# Supplementary material
Source: publisher figshare collection journal article supplement (https://acs.figshare.com/ndownloader/files/3725503)
Supplement: Supplementary file 1 [file 3725503]

 
data_shelx

_audit_creation_method           SHELXL-2014/7
_shelx_SHELXL_version_number     2014/7
_chemical_name_systematic        ?
_chemical_name_common            ?
_chemical_melting_point          ?
_chemical_formula_moiety         ?
_chemical_formula_sum            'C17 H29 Cu2 N2 O10'
_chemical_formula_weight         548.50

loop_
_atom_type_symbol
_atom_type_description
_atom_type_scat_dispersion_real
_atom_type_scat_dispersion_imag
_atom_type_scat_source
C C 0.0033 0.0016 'International Tables Vol C Tables 4.2.6.8 and 6.1.1.4'
H H 0.0000 0.0000 'International Tables Vol C Tables 4.2.6.8 and 6.1.1.4'
N N 0.0061 0.0033 'International Tables Vol C Tables 4.2.6.8 and 6.1.1.4'
O O 0.0106 0.0060 'International Tables Vol C Tables 4.2.6.8 and 6.1.1.4'
Cu Cu 0.3201 1.2651 'International Tables Vol C Tables 4.2.6.8 and 6.1.1.4'

_space_group_crystal_system      monoclinic
_space_group_IT_number           14
_space_group_name_H-M_alt        'P 21/c'
_space_group_name_Hall           '-P 2ybc'

_shelx_space_group_comment       
;
The symmetry employed for this shelxl refinement is uniquely defined
by the following loop, which should always be used as a source of
symmetry information in preference to the above space-group names.
They are only intended as comments.
;

loop_
_space_group_symop_operation_xyz
'x, y, z'
'-x, y+1/2, -z+1/2'
'-x, -y, -z'
'x, -y-1/2, z-1/2'

_cell_length_a                   13.0515(12)
_cell_length_b                   14.5150(14)
_cell_length_c                   12.6791(12)
_cell_angle_alpha                90
_cell_angle_beta                 100.520(3)
_cell_angle_gamma                90
_cell_volume                     2361.6(4)
_cell_formula_units_Z            4
_cell_measurement_temperature    293(2)
_cell_measurement_reflns_used    ?
_cell_measurement_theta_min      2.492
_cell_measurement_theta_max      25.402

_exptl_crystal_description       block
_exptl_crystal_colour            blue

_exptl_crystal_density_meas      'not measured'
_exptl_crystal_density_method    ?
_exptl_crystal_density_diffrn    1.543
_exptl_crystal_F_000             1132
_exptl_transmission_factor_min   ?
_exptl_transmission_factor_max   ?
_exptl_crystal_size_max          0.4
_exptl_crystal_size_mid          0.3
_exptl_crystal_size_min          0.2
_exptl_absorpt_coefficient_mu    1.853
_shelx_estimated_absorpt_T_min   ?
_shelx_estimated_absorpt_T_max   ?

_exptl_absorpt_correction_type   multi-scan
_exptl_absorpt_correction_T_min  0.518
_exptl_absorpt_correction_T_max  0.690
_exptl_absorpt_process_details   'SADABS (Bruker,2005)'
_exptl_absorpt_special_details   ?
_diffrn_ambient_temperature      293(2)


_diffrn_radiation_wavelength     0.71069
_diffrn_radiation_type           MoK\a
_diffrn_source                   ?
_diffrn_measurement_device_type  'Bruker APEX-II CCD area detector'
_diffrn_measurement_method       'phi and omega scans'
_diffrn_detector_area_resol_mean ?
_diffrn_reflns_number            27502
_diffrn_reflns_av_unetI/netI     0.0882
_diffrn_reflns_av_R_equivalents  0.1133
_diffrn_reflns_limit_h_min       -15
_diffrn_reflns_limit_h_max       15
_diffrn_reflns_limit_k_min       -17
_diffrn_reflns_limit_k_max       17
_diffrn_reflns_limit_l_min       -15
_diffrn_reflns_limit_l_max       14
_diffrn_reflns_theta_min         2.492
_diffrn_reflns_theta_max         25.402
_diffrn_reflns_theta_full        25.242
_diffrn_measured_fraction_theta_max 0.974
_diffrn_measured_fraction_theta_full 0.976
_diffrn_reflns_Laue_measured_fraction_max 0.974
_diffrn_reflns_Laue_measured_fraction_full 0.976
_diffrn_reflns_point_group_measured_fraction_max 0.974
_diffrn_reflns_point_group_measured_fraction_full 0.976
_reflns_number_total             4243
_reflns_number_gt                2492
_reflns_threshold_expression     'I > 2\s(I)'
_reflns_Friedel_coverage         0.000
_reflns_Friedel_fraction_max     .
_reflns_Friedel_fraction_full    .

_reflns_special_details          
;
 Reflections were merged by SHELXL according to the crystal
 class for the calculation of statistics and refinement.
 
 _reflns_Friedel_fraction is defined as the number of unique
 Friedel pairs measured divided by the number that would be
 possible theoretically, ignoring centric projections and
 systematic absences.
;


_computing_data_collection       'BRUKER APEX2 (Bruker, 2005)'
_computing_cell_refinement       'BRUKER SMART (Bruker, 2005)'
_computing_data_reduction        'BRUKER SAINT (Bruker, 2005)'
_computing_structure_solution    'SIR 97 (Altomare et al, 1999)'
_computing_structure_refinement  'SHELXL-97 (Sheldrick, 2008)'
_computing_molecular_graphics    'ORTEP 3.2 (Farrugia, 1997) and Mercury 2.2'
_computing_publication_material  ?
_refine_special_details          ?
_refine_ls_structure_factor_coef Fsqd
_refine_ls_matrix_type           full
_refine_ls_weighting_scheme      calc
_refine_ls_weighting_details     
'w=1/[\s^2^(Fo^2^)+(0.1163P)^2^+19.0289P] where P=(Fo^2^+2Fc^2^)/3'
_atom_sites_solution_primary     ?
_atom_sites_solution_secondary   ?
_atom_sites_solution_hydrogens   mixed
_refine_ls_hydrogen_treatment    constr
_refine_ls_extinction_method     none
_refine_ls_extinction_coef       .
_refine_ls_number_reflns         4243
_refine_ls_number_parameters     250
_refine_ls_number_restraints     6
_refine_ls_R_factor_all          0.1595
_refine_ls_R_factor_gt           0.0933
_refine_ls_wR_factor_ref         0.2662
_refine_ls_wR_factor_gt          0.2240
_refine_ls_goodness_of_fit_ref   1.041
_refine_ls_restrained_S_all      1.041
_refine_ls_shift/su_max          0.000
_refine_ls_shift/su_mean         0.000

loop_
_atom_site_label
_atom_site_type_symbol
_atom_site_fract_x
_atom_site_fract_y
_atom_site_fract_z
_atom_site_U_iso_or_equiv
_atom_site_adp_type
_atom_site_occupancy
_atom_site_site_symmetry_order
_atom_site_calc_flag
_atom_site_refinement_flags_posn
_atom_site_refinement_flags_adp
_atom_site_refinement_flags_occupancy
_atom_site_disorder_assembly
_atom_site_disorder_group
Cu1 Cu 0.52459(9) 0.07099(8) 0.92462(8) 0.0342(4) Uani 1 1 d . . . . .
Cu2 Cu 0.92798(10) -0.03575(15) 0.56476(12) 0.0773(7) Uani 1 1 d . . . . .
O1W O 0.2769(11) 0.1515(12) 0.0726(11) 0.149(6) Uani 1 1 d . . . . .
O4 O 0.6460(6) -0.0257(5) 0.7720(6) 0.0519(19) Uani 1 1 d . . . . .
O2W O 0.2552(14) 0.1653(14) 0.6671(14) 0.209(11) Uani 1 1 d . . . . .
O6 O 0.7796(5) -0.0482(5) 0.5482(6) 0.054(2) Uani 1 1 d . . . . .
O1 O 0.5377(8) 0.0497(10) 1.0727(8) 0.107(3) Uani 1 1 d . . . . .
O3 O 0.5222(5) 0.0804(4) 0.7745(5) 0.0387(15) Uani 1 1 d . . . . .
C7 C 0.5740(7) 0.0223(6) 0.7283(7) 0.034(2) Uani 1 1 d . . . . .
C8 C 0.5381(6) 0.0147(6) 0.6090(7) 0.0258(18) Uani 1 1 d . . . . .
C10 C 0.6062(6) 0.0028(6) 0.5380(7) 0.0292(19) Uani 1 1 d . . . . .
C9 C 0.4309(6) 0.0128(6) 0.5694(6) 0.0254(18) Uani 1 1 d . . . . .
H5 H 0.3843 0.0220 0.6158 0.031 Uiso 1 1 calc R U . . .
C11 C 0.7240(7) 0.0166(8) 0.5735(7) 0.039(2) Uani 1 1 d . . . . .
O5 O 0.7543(6) 0.0884(5) 0.6201(7) 0.060(2) Uani 1 1 d . . . . .
O2 O 0.3635(6) 0.1655(6) 0.8781(7) 0.064(2) Uani 1 1 d . . . . .
H80 H 0.3413 0.1594 0.9342 0.076 Uiso 1 1 calc R U . . .
C4 C 0.4098(15) 0.2519(15) 0.8766(15) 0.119(5) Uani 1 1 d . . . . .
H14A H 0.3581 0.2993 0.8792 0.142 Uiso 1 1 calc R U . . .
H14B H 0.4358 0.2591 0.8101 0.142 Uiso 1 1 calc R U . . .
C3 C 0.4961(11) 0.2633(8) 0.9676(13) 0.079(4) Uani 1 1 d . . . . .
H15A H 0.4686 0.2572 1.0333 0.095 Uiso 1 1 calc R U . . .
H15B H 0.5231 0.3254 0.9656 0.095 Uiso 1 1 calc R U . . .
N1 N 0.5841(6) 0.1976(5) 0.9718(6) 0.0381(19) Uani 1 1 d . . . . .
C2 C 0.6358(11) 0.1865(8) 1.0870(9) 0.066(4) Uani 1 1 d . . . . .
H17A H 0.7064 0.1643 1.0903 0.079 Uiso 1 1 calc R U . . .
H17B H 0.6393 0.2458 1.1227 0.079 Uiso 1 1 calc R U . . .
C1 C 0.5764(9) 0.1198(9) 1.1437(10) 0.059(2) Uani 1 1 d . . . . .
H18A H 0.6220 0.0942 1.2058 0.071 Uiso 1 1 calc R U . . .
H18B H 0.5194 0.1512 1.1680 0.071 Uiso 1 1 calc R U . . .
C5 C 0.6595(13) 0.2346(13) 0.9113(17) 0.112(5) Uani 1 1 d . . . . .
H19A H 0.6859 0.2919 0.9450 0.134 Uiso 1 1 calc R U . . .
H19B H 0.6223 0.2497 0.8400 0.134 Uiso 1 1 calc R U . . .
C6 C 0.7493(15) 0.1775(14) 0.899(2) 0.147(7) Uani 1 1 d . . . . .
H20A H 0.7922 0.2103 0.8579 0.220 Uiso 1 1 calc R U . . .
H20B H 0.7892 0.1636 0.9689 0.220 Uiso 1 1 calc R U . . .
H20C H 0.7254 0.1212 0.8634 0.220 Uiso 1 1 calc R U . . .
N2 N 0.9672(7) -0.1107(8) 0.6996(9) 0.069(3) Uani 1 1 d . . . . .
C13 C 1.1331(9) -0.0686(9) 0.6426(10) 0.059(2) Uani 1 1 d . . . . .
H51A H 1.1772 -0.0221 0.6831 0.071 Uiso 1 1 calc R U . A 1
H51B H 1.1782 -0.1099 0.6119 0.071 Uiso 1 1 calc R U . A 1
C12 C 1.0830(9) -0.1214(13) 0.7176(12) 0.087(5) Uani 1 1 d . . . . .
H50A H 1.1119 -0.1021 0.7902 0.105 Uiso 1 1 calc R U . . .
H50B H 1.0996 -0.1861 0.7114 0.105 Uiso 1 1 calc R U . . .
O7 O 1.0745(8) -0.0299(10) 0.5685(8) 0.107(3) Uani 1 1 d . . . B 1
C17 C 0.9253(15) -0.2364(15) 0.565(2) 0.147(7) Uani 1 1 d . . . . .
H86A H 0.8912 -0.2948 0.5500 0.220 Uiso 1 1 calc R U . . .
H86B H 0.8947 -0.1921 0.5124 0.220 Uiso 1 1 calc R U . . .
H86C H 0.9981 -0.2429 0.5628 0.220 Uiso 1 1 calc R U . . .
C16 C 0.9121(13) -0.2023(13) 0.6809(18) 0.112(5) Uani 1 1 d . . . . .
H70A H 0.8388 -0.1955 0.6843 0.134 Uiso 1 1 calc R U . . .
H70B H 0.9427 -0.2465 0.7350 0.134 Uiso 1 1 calc R U . . .
C14 C 0.9270(14) -0.0649(19) 0.7885(15) 0.126(9) Uani 1 1 d . . . . .
H45A H 0.8515 -0.0641 0.7718 0.152 Uiso 1 1 calc R U . . .
H45B H 0.9477 -0.1005 0.8536 0.152 Uiso 1 1 calc R U . . .
O8 O 0.9493(13) 0.0852(11) 0.7093(19) 0.184(8) Uani 1 1 d . . . . .
H543 H 0.8869 0.0893 0.6844 0.221 Uiso 1 1 calc R U . . .
C15 C 0.9643(18) 0.0275(17) 0.8070(17) 0.119(5) Uani 1 1 d . U . . .
H45C H 1.0380 0.0257 0.8377 0.142 Uiso 1 1 calc R U . . .
H45D H 0.9285 0.0562 0.8592 0.142 Uiso 1 1 calc R U . . .
H1W H 0.2960 0.1088 0.1191 0.178 Uiso 1 1 d . U . . .
H2W H 0.2424 0.1906 0.1042 0.178 Uiso 1 1 d . U . . .
H3W H 0.3008 0.1521 0.7234 0.178 Uiso 1 1 d . U . . .
H4W H 0.2697 0.1297 0.6173 0.178 Uiso 1 1 d . U . . .

loop_
_atom_site_aniso_label
_atom_site_aniso_U_11
_atom_site_aniso_U_22
_atom_site_aniso_U_33
_atom_site_aniso_U_23
_atom_site_aniso_U_13
_atom_site_aniso_U_12
Cu1 0.0563(7) 0.0330(6) 0.0151(6) -0.0032(5) 0.0111(5) -0.0062(5)
Cu2 0.0235(6) 0.1663(19) 0.0433(9) 0.0173(10) 0.0098(6) 0.0211(8)
O1W 0.130(10) 0.217(16) 0.110(10) 0.089(11) 0.051(8) 0.082(11)
O4 0.055(4) 0.068(5) 0.029(4) 0.008(4) -0.001(3) 0.018(4)
O2W 0.205(16) 0.229(19) 0.150(14) -0.125(14) -0.079(13) 0.120(15)
O6 0.030(3) 0.073(5) 0.059(5) -0.012(4) 0.012(3) 0.012(3)
O1 0.079(5) 0.195(9) 0.048(4) 0.048(5) 0.016(4) -0.005(5)
O3 0.057(4) 0.043(4) 0.017(3) -0.004(3) 0.010(3) 0.005(3)
C7 0.039(5) 0.040(5) 0.023(5) 0.003(4) 0.005(4) -0.006(4)
C8 0.027(4) 0.030(5) 0.020(4) -0.005(4) 0.004(3) 0.004(3)
C10 0.019(4) 0.044(5) 0.024(5) 0.004(4) 0.002(3) -0.003(4)
C9 0.024(4) 0.041(5) 0.014(4) 0.001(4) 0.013(3) 0.003(4)
C11 0.030(5) 0.067(7) 0.022(5) 0.005(5) 0.006(4) -0.004(5)
O5 0.043(4) 0.066(5) 0.065(6) -0.011(4) -0.009(4) -0.018(4)
O2 0.067(5) 0.061(5) 0.067(6) -0.009(4) 0.024(4) -0.004(4)
C4 0.127(11) 0.127(12) 0.093(10) -0.002(9) -0.006(9) 0.054(10)
C3 0.095(10) 0.030(6) 0.110(12) -0.014(7) 0.012(9) -0.011(6)
N1 0.053(5) 0.037(4) 0.024(4) -0.002(3) 0.007(4) -0.012(4)
C2 0.109(10) 0.055(7) 0.031(6) 0.001(5) 0.002(6) -0.031(7)
C1 0.060(5) 0.065(5) 0.045(5) 0.002(4) -0.007(4) -0.012(4)
C5 0.085(8) 0.105(9) 0.143(12) 0.044(9) 0.016(8) -0.018(7)
C6 0.104(10) 0.106(11) 0.22(2) -0.055(12) 0.000(11) -0.006(8)
N2 0.042(5) 0.096(8) 0.069(7) 0.019(6) 0.011(5) 0.008(5)
C13 0.060(5) 0.065(5) 0.045(5) 0.002(4) -0.007(4) -0.012(4)
C12 0.044(7) 0.150(14) 0.066(9) 0.021(10) 0.006(6) 0.025(8)
O7 0.079(5) 0.195(9) 0.048(4) 0.048(5) 0.016(4) -0.005(5)
C17 0.104(10) 0.106(11) 0.22(2) -0.055(12) 0.000(11) -0.006(8)
C16 0.085(8) 0.105(9) 0.143(12) 0.044(9) 0.016(8) -0.018(7)
C14 0.075(11) 0.23(3) 0.087(13) 0.069(16) 0.035(10) 0.024(13)
O8 0.120(12) 0.139(13) 0.27(2) -0.016(15) -0.025(13) -0.007(10)
C15 0.127(11) 0.127(12) 0.093(10) -0.002(9) -0.006(9) 0.054(10)

_geom_special_details            
;
 All esds (except the esd in the dihedral angle between two l.s. planes)
 are estimated using the full covariance matrix.  The cell esds are taken
 into account individually in the estimation of esds in distances, angles
 and torsion angles; correlations between esds in cell parameters are only
 used when they are defined by crystal symmetry.  An approximate (isotropic)
 treatment of cell esds is used for estimating esds involving l.s. planes.
;

loop_
_geom_bond_atom_site_label_1
_geom_bond_atom_site_label_2
_geom_bond_distance
_geom_bond_site_symmetry_2
_geom_bond_publ_flag
Cu1 O1 1.879(9) . ?
Cu1 O3 1.903(6) . ?
Cu1 O1 1.934(14) 3_657 ?
Cu1 N1 2.042(8) . ?
Cu1 Cu1 2.960(2) 3_657 ?
Cu2 O7 1.906(10) . ?
Cu2 O6 1.918(7) . ?
Cu2 O7 1.935(10) 3_756 ?
Cu2 N2 2.013(11) . ?
Cu2 Cu2 2.904(3) 3_756 ?
O1W H1W 0.861(12) . ?
O1W H2W 0.866(15) . ?
O4 C7 1.219(11) . ?
O2W H3W 0.864(14) . ?
O2W H4W 0.864(14) . ?
O6 C11 1.265(12) . ?
O1 C1 1.391(17) . ?
O1 Cu1 1.934(14) 3_657 ?
O3 C7 1.287(11) . ?
C7 C8 1.503(12) . ?
C8 C10 1.386(12) . ?
C8 C9 1.398(11) . ?
C10 C9 1.378(12) 3_656 ?
C10 C11 1.534(12) . ?
C9 C10 1.378(12) 3_656 ?
C9 H5 0.9300 . ?
C11 O5 1.227(12) . ?
O2 C4 1.39(2) . ?
O2 H80 0.8200 . ?
C4 C3 1.47(2) . ?
C4 H14A 0.9700 . ?
C4 H14B 0.9700 . ?
C3 N1 1.486(16) . ?
C3 H15A 0.9700 . ?
C3 H15B 0.9700 . ?
N1 C5 1.456(18) . ?
N1 C2 1.501(13) . ?
C2 C1 1.503(17) . ?
C2 H17A 0.9700 . ?
C2 H17B 0.9700 . ?
C1 H18A 0.9700 . ?
C1 H18B 0.9700 . ?
C5 C6 1.47(3) . ?
C5 H19A 0.9700 . ?
C5 H19B 0.9700 . ?
C6 H20A 0.9600 . ?
C6 H20B 0.9600 . ?
C6 H20C 0.9600 . ?
N2 C14 1.48(2) . ?
N2 C12 1.495(15) . ?
N2 C16 1.51(2) . ?
C13 O7 1.234(14) . ?
C13 C12 1.465(19) . ?
C13 H51A 0.9700 . ?
C13 H51B 0.9700 . ?
C12 H50A 0.9700 . ?
C12 H50B 0.9700 . ?
O7 Cu2 1.935(10) 3_756 ?
C17 C16 1.59(3) . ?
C17 H86A 0.9600 . ?
C17 H86B 0.9600 . ?
C17 H86C 0.9600 . ?
C16 H70A 0.9700 . ?
C16 H70B 0.9700 . ?
C14 C15 1.43(3) . ?
C14 H45A 0.9700 . ?
C14 H45B 0.9700 . ?
O8 C15 1.48(3) . ?
O8 H543 0.8200 . ?
C15 H45C 0.9700 . ?
C15 H45D 0.9700 . ?

loop_
_geom_angle_atom_site_label_1
_geom_angle_atom_site_label_2
_geom_angle_atom_site_label_3
_geom_angle
_geom_angle_site_symmetry_1
_geom_angle_site_symmetry_3
_geom_angle_publ_flag
O1 Cu1 O3 173.1(5) . . ?
O1 Cu1 O1 78.2(6) . 3_657 ?
O3 Cu1 O1 98.7(4) . 3_657 ?
O1 Cu1 N1 84.0(5) . . ?
O3 Cu1 N1 99.5(3) . . ?
O1 Cu1 N1 161.6(4) 3_657 . ?
O1 Cu1 Cu1 39.8(4) . 3_657 ?
O3 Cu1 Cu1 136.9(2) . 3_657 ?
O1 Cu1 Cu1 38.4(3) 3_657 3_657 ?
N1 Cu1 Cu1 123.6(2) . 3_657 ?
O7 Cu2 O6 174.4(5) . . ?
O7 Cu2 O7 81.7(5) . 3_756 ?
O6 Cu2 O7 95.5(4) . 3_756 ?
O7 Cu2 N2 84.5(4) . . ?
O6 Cu2 N2 97.9(4) . . ?
O7 Cu2 N2 165.8(4) 3_756 . ?
O7 Cu2 Cu2 41.2(3) . 3_756 ?
O6 Cu2 Cu2 135.8(3) . 3_756 ?
O7 Cu2 Cu2 40.5(3) 3_756 3_756 ?
N2 Cu2 Cu2 125.7(3) . 3_756 ?
H1W O1W H2W 105.3(13) . . ?
H3W O2W H4W 105.2(15) . . ?
C11 O6 Cu2 121.1(7) . . ?
C1 O1 Cu1 118.8(9) . . ?
C1 O1 Cu1 139.0(8) . 3_657 ?
Cu1 O1 Cu1 101.8(6) . 3_657 ?
C7 O3 Cu1 119.7(6) . . ?
O4 C7 O3 126.4(8) . . ?
O4 C7 C8 119.2(8) . . ?
O3 C7 C8 114.4(8) . . ?
C10 C8 C9 118.9(8) . . ?
C10 C8 C7 122.9(7) . . ?
C9 C8 C7 118.1(7) . . ?
C9 C10 C8 120.7(7) 3_656 . ?
C9 C10 C11 117.6(8) 3_656 . ?
C8 C10 C11 121.3(8) . . ?
C10 C9 C8 120.4(7) 3_656 . ?
C10 C9 H5 119.8 3_656 . ?
C8 C9 H5 119.8 . . ?
O5 C11 O6 127.1(9) . . ?
O5 C11 C10 118.1(9) . . ?
O6 C11 C10 114.8(9) . . ?
C4 O2 H80 109.5 . . ?
O2 C4 C3 111.3(14) . . ?
O2 C4 H14A 109.4 . . ?
C3 C4 H14A 109.4 . . ?
O2 C4 H14B 109.4 . . ?
C3 C4 H14B 109.4 . . ?
H14A C4 H14B 108.0 . . ?
C4 C3 N1 115.7(12) . . ?
C4 C3 H15A 108.4 . . ?
N1 C3 H15A 108.4 . . ?
C4 C3 H15B 108.4 . . ?
N1 C3 H15B 108.4 . . ?
H15A C3 H15B 107.4 . . ?
C5 N1 C3 109.7(11) . . ?
C5 N1 C2 109.0(10) . . ?
C3 N1 C2 108.1(10) . . ?
C5 N1 Cu1 115.8(10) . . ?
C3 N1 Cu1 108.5(6) . . ?
C2 N1 Cu1 105.5(6) . . ?
C1 C2 N1 110.8(9) . . ?
C1 C2 H17A 109.5 . . ?
N1 C2 H17A 109.5 . . ?
C1 C2 H17B 109.5 . . ?
N1 C2 H17B 109.5 . . ?
H17A C2 H17B 108.1 . . ?
O1 C1 C2 108.6(10) . . ?
O1 C1 H18A 110.0 . . ?
C2 C1 H18A 110.0 . . ?
O1 C1 H18B 110.0 . . ?
C2 C1 H18B 110.0 . . ?
H18A C1 H18B 108.3 . . ?
N1 C5 C6 118.5(16) . . ?
N1 C5 H19A 107.7 . . ?
C6 C5 H19A 107.7 . . ?
N1 C5 H19B 107.7 . . ?
C6 C5 H19B 107.7 . . ?
H19A C5 H19B 107.1 . . ?
C5 C6 H20A 109.5 . . ?
C5 C6 H20B 109.5 . . ?
H20A C6 H20B 109.5 . . ?
C5 C6 H20C 109.5 . . ?
H20A C6 H20C 109.5 . . ?
H20B C6 H20C 109.5 . . ?
C14 N2 C12 114.7(12) . . ?
C14 N2 C16 106.9(14) . . ?
C12 N2 C16 111.8(12) . . ?
C14 N2 Cu2 109.4(10) . . ?
C12 N2 Cu2 106.2(8) . . ?
C16 N2 Cu2 107.6(10) . . ?
O7 C13 C12 116.4(11) . . ?
O7 C13 H51A 108.2 . . ?
C12 C13 H51A 108.2 . . ?
O7 C13 H51B 108.2 . . ?
C12 C13 H51B 108.2 . . ?
H51A C13 H51B 107.3 . . ?
C13 C12 N2 113.9(11) . . ?
C13 C12 H50A 108.8 . . ?
N2 C12 H50A 108.8 . . ?
C13 C12 H50B 108.8 . . ?
N2 C12 H50B 108.8 . . ?
H50A C12 H50B 107.7 . . ?
C13 O7 Cu2 118.6(9) . . ?
C13 O7 Cu2 143.0(10) . 3_756 ?
Cu2 O7 Cu2 98.3(5) . 3_756 ?
C16 C17 H86A 109.5 . . ?
C16 C17 H86B 109.5 . . ?
H86A C17 H86B 109.5 . . ?
C16 C17 H86C 109.5 . . ?
H86A C17 H86C 109.5 . . ?
H86B C17 H86C 109.5 . . ?
N2 C16 C17 106.9(14) . . ?
N2 C16 H70A 110.3 . . ?
C17 C16 H70A 110.3 . . ?
N2 C16 H70B 110.3 . . ?
C17 C16 H70B 110.3 . . ?
H70A C16 H70B 108.6 . . ?
C15 C14 N2 112.9(16) . . ?
C15 C14 H45A 109.0 . . ?
N2 C14 H45A 109.0 . . ?
C15 C14 H45B 109.0 . . ?
N2 C14 H45B 109.0 . . ?
H45A C14 H45B 107.8 . . ?
C15 O8 H543 109.5 . . ?
C14 C15 O8 113.8(17) . . ?
C14 C15 H45C 108.8 . . ?
O8 C15 H45C 108.8 . . ?
C14 C15 H45D 108.8 . . ?
O8 C15 H45D 108.8 . . ?
H45C C15 H45D 107.7 . . ?

loop_
_geom_torsion_atom_site_label_1
_geom_torsion_atom_site_label_2
_geom_torsion_atom_site_label_3
_geom_torsion_atom_site_label_4
_geom_torsion
_geom_torsion_site_symmetry_1
_geom_torsion_site_symmetry_2
_geom_torsion_site_symmetry_3
_geom_torsion_site_symmetry_4
_geom_torsion_publ_flag
O1 Cu1 O1 C1 -174.7(13) 3_657 . . . ?
N1 Cu1 O1 C1 0.6(10) . . . . ?
Cu1 Cu1 O1 C1 -174.7(13) 3_657 . . . ?
O1 Cu1 O1 Cu1 0.000(1) 3_657 . . 3_657 ?
N1 Cu1 O1 Cu1 175.3(5) . . . 3_657 ?
Cu1 O3 C7 O4 -19.4(13) . . . . ?
Cu1 O3 C7 C8 159.6(6) . . . . ?
O4 C7 C8 C10 -38.4(13) . . . . ?
O3 C7 C8 C10 142.4(9) . . . . ?
O4 C7 C8 C9 136.6(9) . . . . ?
O3 C7 C8 C9 -42.5(11) . . . . ?
C9 C8 C10 C9 -1.4(14) . . . 3_656 ?
C7 C8 C10 C9 173.7(8) . . . 3_656 ?
C9 C8 C10 C11 171.9(8) . . . . ?
C7 C8 C10 C11 -13.0(13) . . . . ?
C10 C8 C9 C10 1.4(14) . . . 3_656 ?
C7 C8 C9 C10 -173.9(8) . . . 3_656 ?
Cu2 O6 C11 O5 -8.2(14) . . . . ?
Cu2 O6 C11 C10 170.0(6) . . . . ?
C9 C10 C11 O5 122.5(10) 3_656 . . . ?
C8 C10 C11 O5 -51.0(13) . . . . ?
C9 C10 C11 O6 -55.8(12) 3_656 . . . ?
C8 C10 C11 O6 130.7(10) . . . . ?
O2 C4 C3 N1 62(2) . . . . ?
C4 C3 N1 C5 88.4(17) . . . . ?
C4 C3 N1 C2 -152.8(14) . . . . ?
C4 C3 N1 Cu1 -38.9(16) . . . . ?
C5 N1 C2 C1 -160.1(13) . . . . ?
C3 N1 C2 C1 80.7(12) . . . . ?
Cu1 N1 C2 C1 -35.2(12) . . . . ?
Cu1 O1 C1 C2 -20.6(14) . . . . ?
Cu1 O1 C1 C2 167.3(11) 3_657 . . . ?
N1 C2 C1 O1 36.7(15) . . . . ?
C3 N1 C5 C6 -176.0(16) . . . . ?
C2 N1 C5 C6 66(2) . . . . ?
Cu1 N1 C5 C6 -53(2) . . . . ?
O7 C13 C12 N2 -7(2) . . . . ?
C14 N2 C12 C13 -114.9(16) . . . . ?
C16 N2 C12 C13 123.2(16) . . . . ?
Cu2 N2 C12 C13 6.1(16) . . . . ?
C12 C13 O7 Cu2 4.1(19) . . . . ?
C12 C13 O7 Cu2 -170.2(16) . . . 3_756 ?
C14 N2 C16 C17 161.9(14) . . . . ?
C12 N2 C16 C17 -71.8(16) . . . . ?
Cu2 N2 C16 C17 44.4(15) . . . . ?
C12 N2 C14 C15 62(2) . . . . ?
C16 N2 C14 C15 -173.5(14) . . . . ?
Cu2 N2 C14 C15 -57.3(17) . . . . ?
N2 C14 C15 O8 51(2) . . . . ?

_refine_diff_density_max         1.561
_refine_diff_density_min         -1.407
_refine_diff_density_rms         0.146

_shelx_res_file                  
;

    shelx.res created by SHELXL-2014/7

TITL TAF51 in P2(1)/c
CELL  0.71073  13.0515  14.5150  12.6791   90.000  100.520   90.000
ZERR     4.00   0.0012   0.0014   0.0012    0.000    0.003    0.000
LATT   1
SYMM  - X, 1/2 + Y, 1/2 - Z
SFAC  C    H    N    O    CU
UNIT  68 116 8 40 8
MERG   2
OMIT    -3   2   2
OMIT    -1   1   2
OMIT    -5   2  15
OMIT    -3   4   2
OMIT    -2   1   5
OMIT     0   1   2
OMIT     0   4   0
OMIT     1  13   4
OMIT    -5   1   2
OMIT    -3   1   1
OMIT     1  16   5
OMIT     2   4   0
OMIT    -4   6   2
OMIT    -7   9   4
OMIT     2   3   2
OMIT     0  12   0
OMIT    -6   0   8
OMIT     1   3   1
OMIT     6   6   1
OMIT     2   8   1
OMIT    -6   6   1
OMIT    -5   5   3
OMIT     2   0   6
OMIT     2   7   2
OMIT     7   5   5
OMIT     4   6   1
OMIT     1   2   0
OMIT    -2   1   1
OMIT     1   0   2
OMIT     2   2   1
OMIT    -4   1   3
OMIT     3   2   1
OMIT     2   3   0
OMIT     0   2   2
OMIT     2   0   2
OMIT     2   2   2
OMIT     0   4   1
OMIT     1  10   3
OMIT     1   4   1
OMIT    -1  10   3
OMIT     0   0   2
OMIT     1   2   3
OMIT     6   4   0
OMIT     0  12   3
OMIT     1   6   0
OMIT     5   9   0
OMIT     3   5   1
OMIT     2   7   0
OMIT     1   4   3
OMIT     2   4   3
OMIT     0  11   2
OMIT    -5   1   5
OMIT    -2   4   1
OMIT     3   8   1
OMIT     2   8   2
OMIT     0   7   2
OMIT    -3   8   1
OMIT     2   9   2
OMIT     1   6   3
OMIT     3   6   7
OMIT    -2   3   3
OMIT     3   4   4
OMIT     4   7   0
OMIT    -4   7   6
OMIT    -4   5   1
OMIT    -3   4   3
OMIT     5   4   2
OMIT     0  11   1
OMIT    -5   8   1
OMIT     9   7   9
OMIT     4   5   3
OMIT     0   9   2
OMIT     6  10   2
OMIT    -5   0   4
OMIT    -1   4   2
OMIT     0   9   1
OMIT     1   4   4
OMIT    -1  12   2
OMIT   -10   0   2
OMIT     2   9   0
OMIT    -3   6   1
OMIT    -2   5   4
OMIT    -4   5   3
OMIT     6   0   0
OMIT     0   9   7
OMIT     2   6  10
OMIT    -1   8   5
OMIT     0  13   7
OMIT    -2  12   5
ISOR  0.10 0.20 C15
EADP O1 O7
EADP C4 C15
EADP C1 C13
EADP C5 C16
EADP C6 C17
FMAP   2
PLAN   20
ACTA
BOND   $H
CONF
L.S.  60
TEMP     0.00
WGHT    0.116300   19.028900
FVAR       0.11048
CU1   5    0.524586    0.070991    0.924622    11.00000    0.05632    0.03299 =
         0.01506   -0.00316    0.01110   -0.00616
CU2   5    0.927977   -0.035749    0.564758    11.00000    0.02349    0.16633 =
         0.04333    0.01731    0.00977    0.02114
O1W   4    0.276862    0.151504    0.072561    11.00000    0.13013    0.21746 =
         0.11049    0.08885    0.05068    0.08210
O4    4    0.645961   -0.025721    0.771963    11.00000    0.05549    0.06780 =
         0.02907    0.00825   -0.00106    0.01808
O2W   4    0.255158    0.165277    0.667134    11.00000    0.20524    0.22873 =
         0.15049   -0.12462   -0.07912    0.11970
O6    4    0.779597   -0.048240    0.548227    11.00000    0.02985    0.07274 =
         0.05930   -0.01221    0.01183    0.01201
O1    4    0.537737    0.049678    1.072700    11.00000    0.07885    0.19501 =
         0.04768    0.04764    0.01605   -0.00463
O3    4    0.522167    0.080364    0.774491    11.00000    0.05670    0.04337 =
         0.01724   -0.00386    0.00994    0.00485
C7    1    0.573982    0.022322    0.728255    11.00000    0.03865    0.04029 =
         0.02279    0.00300    0.00472   -0.00565
C8    1    0.538072    0.014723    0.608974    11.00000    0.02662    0.03043 =
         0.02000   -0.00524    0.00367    0.00359
C10   1    0.606164    0.002761    0.537998    11.00000    0.01938    0.04373 =
         0.02373    0.00352    0.00180   -0.00276
C9    1    0.430873    0.012770    0.569385    11.00000    0.02418    0.04150 =
         0.01432    0.00087    0.01331    0.00282
AFIX  43
H5    2    0.384280    0.022010    0.615805    11.00000   -1.20000
AFIX   0
C11   1    0.723958    0.016614    0.573524    11.00000    0.02975    0.06735 =
         0.02171    0.00470    0.00623   -0.00418
O5    4    0.754340    0.088358    0.620090    11.00000    0.04290    0.06570 =
         0.06494   -0.01127   -0.00937   -0.01779
O2    4    0.363494    0.165548    0.878131    11.00000    0.06688    0.06101 =
         0.06708   -0.00896    0.02370   -0.00361
AFIX  83
H80   2    0.341278    0.159412    0.934187    11.00000   -1.20000
AFIX   0
C4    1    0.409834    0.251858    0.876552    11.00000    0.12651    0.12696 =
         0.09260   -0.00206   -0.00635    0.05360
AFIX  23
H14A  2    0.358077    0.299347    0.879211    11.00000   -1.20000
H14B  2    0.435792    0.259118    0.810061    11.00000   -1.20000
AFIX   0
C3    1    0.496103    0.263280    0.967568    11.00000    0.09462    0.02965 =
         0.10994   -0.01374    0.01218   -0.01087
AFIX  23
H15A  2    0.468641    0.257209    1.033343    11.00000   -1.20000
H15B  2    0.523108    0.325392    0.965594    11.00000   -1.20000
AFIX   0
N1    3    0.584092    0.197625    0.971821    11.00000    0.05305    0.03709 =
         0.02401   -0.00170    0.00656   -0.01166
C2    1    0.635760    0.186491    1.086954    11.00000    0.10936    0.05462 =
         0.03076    0.00058    0.00246   -0.03119
AFIX  23
H17A  2    0.706379    0.164273    1.090340    11.00000   -1.20000
H17B  2    0.639346    0.245807    1.122678    11.00000   -1.20000
AFIX   0
C1    1    0.576373    0.119772    1.143707    11.00000    0.05997    0.06528 =
         0.04539    0.00226   -0.00697   -0.01240
AFIX  23
H18A  2    0.621979    0.094184    1.205798    11.00000   -1.20000
H18B  2    0.519360    0.151217    1.168029    11.00000   -1.20000
AFIX   0
C5    1    0.659459    0.234557    0.911322    11.00000    0.08496    0.10459 =
         0.14341    0.04401    0.01639   -0.01775
AFIX  23
H19A  2    0.685872    0.291918    0.945029    11.00000   -1.20000
H19B  2    0.622327    0.249650    0.839984    11.00000   -1.20000
AFIX   0
C6    1    0.749327    0.177483    0.899345    11.00000    0.10390    0.10551 =
         0.21911   -0.05515   -0.00041   -0.00592
AFIX  33
H20A  2    0.792163    0.210260    0.857946    11.00000   -1.50000
H20B  2    0.789247    0.163644    0.968891    11.00000   -1.50000
H20C  2    0.725406    0.121178    0.863355    11.00000   -1.50000
AFIX   0
N2    3    0.967185   -0.110729    0.699626    11.00000    0.04174    0.09628 =
         0.06941    0.01910    0.01126    0.00751
C13   1    1.133108   -0.068578    0.642643    11.00000    0.05997    0.06528 =
         0.04539    0.00226   -0.00697   -0.01240
AFIX  23
H51A  2    1.177159   -0.022124    0.683125    11.00000   -1.20000
H51B  2    1.178155   -0.109878    0.611882    11.00000   -1.20000
AFIX   0
C12   1    1.083038   -0.121422    0.717600    11.00000    0.04384    0.14982 =
         0.06601    0.02148    0.00554    0.02492
AFIX  23
H50A  2    1.111943   -0.102105    0.790175    11.00000   -1.20000
H50B  2    1.099572   -0.186119    0.711365    11.00000   -1.20000
AFIX   0
PART    1
O7    4    1.074453   -0.029899    0.568507    11.00000    0.07885    0.19501 =
         0.04768    0.04764    0.01605   -0.00463
PART    0
C17   1    0.925343   -0.236411    0.565072    11.00000    0.10390    0.10551 =
         0.21911   -0.05515   -0.00041   -0.00592
AFIX  33
H86A  2    0.891189   -0.294771    0.550033    11.00000   -1.50000
H86B  2    0.894747   -0.192140    0.512361    11.00000   -1.50000
H86C  2    0.998114   -0.242918    0.562839    11.00000   -1.50000
AFIX   0
C16   1    0.912069   -0.202327    0.680886    11.00000    0.08496    0.10459 =
         0.14341    0.04401    0.01639   -0.01775
AFIX  23
H70A  2    0.838814   -0.195455    0.684275    11.00000   -1.20000
H70B  2    0.942678   -0.246479    0.734996    11.00000   -1.20000
AFIX   0
C14   1    0.927044   -0.064881    0.788454    11.00000    0.07493    0.22509 =
         0.08673    0.06868    0.03460    0.02411
AFIX  23
H45A  2    0.851498   -0.064075    0.771785    11.00000   -1.20000
H45B  2    0.947715   -0.100477    0.853614    11.00000   -1.20000
AFIX   0
O8    4    0.949294    0.085152    0.709276    11.00000    0.12034    0.13930 =
         0.26997   -0.01566   -0.02506   -0.00716
AFIX  83
H543  2    0.886889    0.089258    0.684448    11.00000   -1.20000
AFIX   0
C15   1    0.964308    0.027545    0.807017    11.00000    0.12651    0.12696 =
         0.09260   -0.00206   -0.00635    0.05360
AFIX  23
H45C  2    1.038008    0.025700    0.837746    11.00000   -1.20000
H45D  2    0.928522    0.056193    0.859160    11.00000   -1.20000
AFIX   0
H1W   2   10.296020   10.108821   10.119130    11.00000   -1.50000
H2W   2   10.242449   10.190570   10.104170    11.00000   -1.50000
H3W   2   10.300830   10.152141   10.723450    11.00000   -1.50000
H4W   2   10.269740   10.129690   10.617250    11.00000   -1.50000
HKLF    4  1.0  1.00  0.00  0.00  0.00  1.00  0.00  0.00  0.00  1.00

REM  TAF51 in P2(1)/c
REM R1 =  0.0933 for    2492 Fo > 4sig(Fo)  and  0.1595 for all    4243 data
REM    250 parameters refined using      6 restraints

END

WGHT      0.1154     19.2429

REM Highest difference peak  1.561,  deepest hole -1.407,  1-sigma level  0.146
Q1    1   1.0616 -0.0796  0.5364  11.00000  0.05    1.40
Q2    1   0.4980  0.0618  1.0679  11.00000  0.05    1.32
Q3    1   1.0853  0.0207  0.5862  11.00000  0.05    1.04
Q4    1   0.9137  0.2122  0.6042  11.00000  0.05    0.95
Q5    1   0.9386 -0.1728  0.4769  11.00000  0.05    0.94
Q6    1   0.8923 -0.2558  0.6286  11.00000  0.05    0.69
Q7    1   1.1177 -0.1041  0.6035  11.00000  0.05    0.63
Q8    1   0.5375  0.2642  0.8767  11.00000  0.05    0.62
Q9    1   0.2449  0.0666  0.0098  11.00000  0.05    0.54
Q10   1   0.5499  0.1211  1.1368  11.00000  0.05    0.51
Q11   1   0.5628  0.2056  1.0824  11.00000  0.05    0.50
Q12   1   0.9232 -0.0654  0.5761  11.00000  0.05    0.49
Q13   1   0.9653 -0.0659  0.9036  11.00000  0.05    0.48
Q14   1   1.1390 -0.0157  0.6599  11.00000  0.05    0.46
Q15   1   0.9162 -0.2046  0.6242  11.00000  0.05    0.46
Q16   1   1.2236 -0.0808  0.6535  11.00000  0.05    0.46
Q17   1   0.4391  0.1849  0.9194  11.00000  0.05    0.45
Q18   1   1.1023 -0.1457  0.5814  11.00000  0.05    0.43
Q19   1   0.4839  0.1962  0.9359  11.00000  0.05    0.42
Q20   1   0.8254 -0.1977  0.5953  11.00000  0.05    0.41
;
_shelx_res_checksum              9819

_shelx_hkl_file                  
;
   0   0  -2  313.76    8.38
   0   0   2  314.68    8.39
   0   0  -3   -0.05    0.71
   0   0   3   -1.12    0.76
   0   0  -4   82.77    2.61
   0   0   4   80.59    2.69
   0   0  -5    0.62    0.89
   0   0   5    1.64    0.90
   0   0  -6  676.36   17.99
   0   0  -6  668.23   17.91
   0   0   6  671.82   18.00
   0   0  -7   -2.09    1.02
   0   0  -7   -2.96    0.89
   0   0  -8  162.34    4.87
   0   0  -8  166.67    5.04
   0   0  -9   -3.01    1.35
   0   0  -9   -2.42    1.26
   0   0 -10    7.06    1.74
   0   0 -10    4.07    1.43
   0   0 -11   -2.05    1.90
   0   0 -11   -2.27    1.51
   0   0 -12   11.22    1.89
   0   0 -12    6.32    2.43
   0   0 -13    2.56    1.97
   0   0 -13   -4.31    2.50
   0   0 -14   46.10    3.40
   0  -1 -14   -1.02    2.21
   0  -1 -13   22.69    2.27
   0  -1 -13   12.13    2.73
   0  -1 -12    3.28    2.32
   0  -1 -12   -1.20    1.79
   0  -1 -11   10.36    2.05
   0  -1 -11    6.36    1.76
   0  -1 -10    0.33    1.50
   0  -1 -10    1.24    1.64
   0   1   9   15.90    1.58
   0  -1  -9   13.26    1.67
   0  -1  -9   14.33    1.57
   0   1   8    1.45    1.21
   0  -1  -8    0.29    1.24
   0   1   7    2.06    1.14
   0  -1  -7   -0.11    1.13
   0   1   6   23.31    1.74
   0  -1  -6   24.15    1.74
   0   1   5   -0.47    0.91
   0  -1  -5   -1.23    0.92
   0   1   4   63.57    2.27
   0  -1  -4   64.26    2.22
   0   1   3   12.19    1.27
   0  -1  -3   13.69    1.18
   0   1   2  133.06    3.77
   0  -1  -2  136.91    3.75
   0   1  -2  132.01    3.74
   0  -1   2  132.92    3.73
   0   1  -3   13.49    1.01
   0   1  -3    9.74    1.11
   0   1  -4   62.81    2.05
   0   1  -4   50.66    2.56
   0   1  -5   -0.66    0.84
   0   1  -5   -2.86    0.98
   0   1  -6   18.89    1.63
   0   1  -6   16.00    1.78
   0   1  -7   -0.45    1.04
   0   1  -7   -1.37    1.14
   0   1  -8   -2.54    1.22
   0   1  -8    0.90    0.97
   0   1  -9   16.60    1.63
   0   1 -10    1.26    1.30
   0   1 -10   -4.24    1.57
   0   1 -11    5.05    2.02
   0   1 -12   -4.62    2.25
   0   1 -13    9.15    2.63
   0  -2 -14   22.04    2.59
   0  -2 -13    1.97    3.89
   0  -2 -13    1.73    2.19
   0  -2 -12    7.47    2.01
   0  -2 -12   10.40    2.52
   0   2  11    2.37    1.80
   0  -2 -11    0.57    1.98
   0  -2 -11   -2.52    1.71
   0   2  10   10.14    1.73
   0  -2 -10   10.23    1.85
   0   2   9    4.69    1.41
   0  -2  -9    3.60    1.54
   0   2   8  135.35    4.32
   0  -2  -8  134.07    4.33
   0   2   7   16.30    1.80
   0  -2  -7   17.88    2.06
   0   2   6  294.77    8.29
   0  -2  -6  302.04    8.28
   0   2   5    2.41    0.96
   0  -2  -5    2.36    0.98
   0   2   4   18.56    1.41
   0  -2  -4   13.62    1.38
   0  -2  -3   14.79    1.27
   0   2   2   16.94    1.23
   0  -2  -2   18.22    1.17
   0   2   1    0.38    0.61
   0   2   1   -1.05    0.63
   0  -2  -1   -2.14    0.59
   0  -2  -1   -0.32    0.60
   0  -2  -1    0.04    0.46
   0   2   0  717.83   18.31
   0   2   0  668.20   18.31
   0   2   0  709.72   18.28
   0   2   0  686.18   18.28
   0  -2   0  707.62   18.31
   0  -2   0  696.70   18.28
   0  -2   0  664.93   18.30
   0   2  -1    0.97    0.67
   0  -2   1    1.10    0.64
   0   2  -2   19.08    1.38
   0  -2   2   16.37    1.33
   0   2  -3   15.20    1.56
   0  -2   3   14.99    1.48
   0   2  -4   18.73    1.56
   0   2  -5    1.17    0.92
   0   2  -5    4.41    1.06
   0   2  -6  308.02    8.53
   0   2  -6  306.38    8.48
   0   2  -7   16.38    1.73
   0   2  -7   19.43    2.10
   0   2  -8  144.87    4.67
   0   2  -8  140.99    4.54
   0   2  -9    5.70    1.46
   0   2  -9    7.31    1.72
   0   2 -10   13.86    1.98
   0   2 -10   11.57    1.80
   0   2 -11   -0.44    1.86
   0   2 -12   10.00    2.46
   0   2 -13   -0.97    2.50
   0  -3 -14   -0.32    2.49
   0  -3 -13   -4.69    2.17
   0   3  12   19.68    2.27
   0  -3 -12   19.28    2.31
   0  -3 -12   14.66    2.60
   0   3  11   -2.27    1.73
   0  -3 -11   -0.54    2.10
   0   3  10   55.65    3.00
   0  -3 -10   57.19    3.24
   0   3   9    4.01    1.44
   0  -3  -9    6.88    1.62
   0   3   8   15.69    1.53
   0  -3  -8   13.72    1.52
   0   3   7    9.27    1.30
   0  -3  -7    9.45    1.37
   0   3   6   57.85    2.38
   0  -3  -6   57.83    2.42
   0   3   5  127.77    3.92
   0  -3  -5  126.20    3.90
   0   3   4  119.95    3.67
   0  -3  -4  121.92    3.68
   0   3   3   60.50    2.23
   0  -3  -3   63.13    2.20
   0   3   2    5.81    0.98
   0   3   2    9.09    0.92
   0  -3  -2    7.43    0.93
   0  -3  -2    4.67    0.92
   0   3   1  381.88   10.50
   0   3   1  399.93   10.50
   0   3   1  392.12   10.58
   0   3   1  396.21   10.56
   0  -3  -1  410.42   10.57
   0  -3  -1  390.02   10.57
   0  -3  -1  392.22   10.50
   0  -3  -1  398.05   10.51
   0   3   0    0.06    0.55
   0   3   0    0.07    0.86
   0   3   0   -1.78    0.77
   0   3   0    0.18    0.65
   0  -3   0    0.41    0.60
   0  -3   0    1.07    0.79
   0  -3   0   -2.19    0.83
   0   3  -1  393.73   10.36
   0   3  -1  382.90   10.30
   0   3  -1  372.11   10.39
   0   3  -1  395.12   10.29
   0  -3   1  404.51   10.31
   0  -3   1  393.02   10.29
   0  -3   1  388.01   10.29
   0  -3   1  369.32   10.38
   0   3  -2    7.46    1.04
   0  -3   2    5.74    0.95
   0   3  -3   59.06    2.28
   0  -3   3   60.17    2.30
   0   3  -4  116.37    3.62
   0  -3   4  118.04    3.67
   0   3  -5  127.46    3.95
   0   3  -6   56.92    2.61
   0   3  -7   12.02    1.63
   0   3  -7   14.36    1.57
   0   3  -8   16.15    1.56
   0   3  -8   17.48    1.79
   0   3  -9    9.65    1.84
   0   3  -9    7.95    1.56
   0   3 -10   52.44    3.03
   0   3 -11   -0.37    1.92
   0   3 -12   18.33    2.65
   0   3 -12   26.82    2.74
   0   3 -13    1.28    2.63
   0   3 -13   -1.09    2.63
   0   4  14    3.10    2.67
   0  -4 -14    0.29    2.57
   0   4  13   -0.65    2.38
   0  -4 -13    2.07    2.35
   0   4  12   -1.92    2.07
   0  -4 -12   -5.06    2.46
   0   4  11    5.32    1.90
   0  -4 -11    3.32    2.22
   0   4  10    2.79    1.74
   0  -4 -10    1.96    1.92
   0   4   9   34.13    2.52
   0  -4  -9   31.15    2.69
   0   4   8   12.49    1.51
   0  -4  -8   11.31    1.59
   0   4   7   38.74    2.15
   0  -4  -7   37.70    2.29
   0   4   6   34.76    2.12
   0  -4  -6   37.75    2.17
   0   4   5   -0.74    1.11
   0  -4  -5   -0.11    1.09
   0   4   4    1.88    1.03
   0   4   4   -0.08    0.97
   0  -4  -4    2.63    0.90
   0   4   3   -0.42    1.00
   0   4   3    2.39    0.94
   0  -4  -3   -0.26    0.98
   0  -4  -3    0.27    1.01
   0   4   2  119.32    4.16
   0   4   2  138.29    3.90
   0  -4  -2  141.03    3.97
   0  -4  -2  135.70    3.80
   0   4   1   -0.44    0.93
   0   4   1    1.09    0.67
   0   4   1   -0.01    1.01
   0  -4  -1    0.53    0.73
   0  -4  -1    1.80    1.00
   0   4   0  191.29    5.05
   0   4   0  185.29    5.15
   0  -4   0  174.63    5.18
   0   4  -1    0.64    0.69
   0   4  -1    0.25    0.97
   0  -4   1    1.57    0.73
   0  -4   1    0.29    0.86
   0  -4   1   -0.08    0.77
   0  -4   1    1.25    0.99
   0   4  -2  133.70    4.01
   0  -4   2  135.47    4.03
   0   4  -3    1.32    1.03
   0  -4   3   -0.29    1.07
   0   4  -4    1.98    1.06
   0  -4   4   -0.54    1.19
   0   4  -5    1.00    1.19
   0  -4   5    1.58    1.28
   0   4  -6   35.60    2.30
   0   4  -7   37.13    2.47
   0   4  -8   12.79    1.50
   0   4  -8   12.20    1.68
   0   4  -9   31.07    2.54
   0   4  -9   35.15    2.91
   0   4 -10    1.57    1.79
   0   4 -10    3.67    1.98
   0   4 -11    6.33    2.27
   0   4 -11    5.13    2.16
   0   4 -12    0.94    2.49
   0   4 -12   -5.63    2.36
   0   4 -13    1.41    2.90
   0   4 -14    2.77    3.09
   0   5  14    1.24    2.88
   0  -5 -14   -7.62    5.12
   0   5  13   14.02    2.78
   0   5  12   14.00    2.30
   0  -5 -12   13.64    2.68
   0   5  11   -0.92    1.97
   0  -5 -11    5.76    2.38
   0   5  10   35.95    2.76
   0  -5 -10   31.63    3.18
   0   5   9   12.91    1.69
   0  -5  -9   15.56    1.91
   0   5   8    2.53    1.33
   0  -5  -8    2.29    1.52
   0   5   7   55.96    2.59
   0  -5  -7   56.55    2.64
   0   5   6   32.78    2.07
   0  -5  -6   33.96    2.11
   0   5   5   29.27    1.93
   0   5   4  188.16    5.44
   0  -5  -4  186.93    5.33
   0   5   3   12.26    1.16
   0  -5  -3   14.13    1.28
   0  -5  -3   13.05    1.42
   0   5   2  171.60    4.89
   0   5   2  167.11    4.85
   0  -5  -2  169.61    4.91
   0  -5  -2  167.26    4.72
   0  -5  -2  170.23    4.86
   0  -5  -2  168.07    4.74
   0   5   1  103.85    3.33
   0   5   1  105.78    3.25
   0   5   1  106.53    3.10
   0   5   1  101.37    3.11
   0  -5  -1  102.61    3.14
   0  -5  -1  104.45    3.10
   0  -5  -1  107.72    3.26
   0  -5  -1  105.13    3.35
   0   5   0    0.17    0.75
   0   5   0    0.23    1.02
   0   5   0    0.57    0.75
   0   5   0   -1.09    1.06
   0  -5   0   -0.12    0.98
   0  -5   0    0.48    0.73
   0  -5   0    0.90    1.04
   0   5  -1  108.28    3.28
   0   5  -1  101.72    3.12
   0   5  -1  107.78    3.12
   0   5  -1   97.89    3.30
   0  -5   1  107.32    3.15
   0  -5   1  101.45    3.36
   0  -5   1  104.84    3.13
   0  -5   1  105.85    3.06
   0   5  -2  175.99    4.90
   0   5  -2  160.67    4.93
   0   5  -2  174.98    4.75
   0  -5   2  166.93    4.96
   0   5  -3   13.75    1.29
   0  -5   3   16.98    1.80
   0   5  -4  181.29    5.45
   0  -5   4  188.25    5.49
   0   5  -5   30.39    2.20
   0  -5   5   32.42    2.29
   0   5  -6   31.70    2.34
   0   5  -7   59.93    2.96
   0   5  -8   -0.40    1.66
   0   5  -9   16.62    2.09
   0   5  -9   14.93    1.83
   0   5 -10   42.43    3.49
   0   5 -10   30.30    2.98
   0   5 -11   -0.06    2.32
   0   5 -11    3.29    2.24
   0   5 -12   15.58    2.77
   0   5 -12   13.56    2.76
   0   5 -13   20.82    3.10
   0   5 -14   -3.80    2.99
   0   6  14    4.88    2.94
   0  -6 -14    7.55    2.87
   0   6  13    2.06    2.77
   0   6  12    2.62    2.43
   0   6  11   -1.12    2.07
   0  -6 -11    3.01    2.44
   0   6  10   -0.27    1.69
   0  -6 -10    3.13    2.12
   0   6   9    0.76    1.56
   0  -6  -9   -2.44    1.73
   0   6   8    4.50    1.51
   0   6   7    2.08    1.30
   0   6   6   11.44    1.42
   0   6   5   13.68    1.35
   0   6   5   15.55    1.48
   0   6   4   -0.46    1.13
   0  -6  -4   -0.10    1.10
   0   6   3    7.11    1.26
   0   6   3    3.36    1.14
   0  -6  -3    4.94    0.95
   0  -6  -3    4.38    1.25
   0  -6  -3    3.84    1.16
   0  -6  -3    4.41    0.79
   0   6   2   -1.75    1.09
   0   6   2   -0.10    1.18
   0   6   2    1.16    0.79
   0   6   2    0.78    0.79
   0  -6  -2    1.11    0.91
   0  -6  -2   -1.43    1.08
   0  -6  -2   -1.80    1.22
   0  -6  -2    0.49    0.82
   0   6   1    0.65    1.13
   0   6   1    0.88    0.83
   0   6   1    1.12    0.82
   0   6   1   -1.95    1.03
   0  -6  -1    0.61    0.78
   0  -6  -1    0.53    1.13
   0  -6  -1    0.53    1.04
   0   6   0   26.67    1.87
   0   6   0   30.17    1.53
   0   6   0   26.13    1.50
   0   6   0   26.13    1.79
   0  -6   0   27.25    1.61
   0  -6   0   27.35    1.43
   0  -6   0   25.51    1.67
   0  -6   0   29.76    1.97
   0   6  -1    0.26    1.02
   0   6  -1    1.10    0.85
   0   6  -1   -0.65    1.16
   0   6  -1   -0.28    0.83
   0  -6   1    0.43    1.19
   0  -6   1   -0.38    0.74
   0  -6   1   -1.02    0.96
   0  -6   1   -0.32    0.91
   0   6  -2    0.65    1.16
   0   6  -2   -0.57    1.19
   0   6  -2   -0.30    0.87
   0  -6   2   -1.61    0.94
   0  -6   2   -0.62    1.19
   0   6  -3    5.56    1.30
   0   6  -3    4.63    1.27
   0   6  -3    4.59    0.93
   0  -6   3    4.95    1.31
   0   6  -4   -0.50    1.29
   0  -6   4    1.83    1.35
   0   6  -5   12.24    1.48
   0   6  -6   14.50    1.63
   0  -6   6   12.37    1.69
   0   6  -7    4.13    1.58
   0  -6   7    5.77    1.82
   0   6  -8    4.92    1.76
   0   6  -9    1.56    1.89
   0   6 -10   -1.84    2.12
   0   6 -10    0.63    2.01
   0   6 -11    2.84    2.35
   0   6 -11   -3.76    2.24
   0   6 -12    2.91    2.56
   0   6 -12    8.60    2.60
   0   6 -13   -1.09    2.86
   0   6 -14    9.32    4.33
   0   7  13   13.21    2.86
   0   7  12   -0.70    2.33
   0   7  11    5.07    2.07
   0   7  10   -0.48    1.76
   0   7   9   -0.10    1.69
   0   7   8   12.95    1.73
   0   7   6    0.29    1.33
   0   7   5   24.33    1.97
   0   7   5   22.50    2.02
   0  -7  -5   24.39    1.96
   0   7   4   13.01    1.49
   0   7   4    9.87    1.35
   0  -7  -4   11.64    1.44
   0  -7  -4    8.71    1.05
   0  -7  -4    9.44    1.11
   0  -7  -4    9.81    1.46
   0   7   3    6.12    1.26
   0   7   3    9.89    1.38
   0  -7  -3    8.47    1.46
   0  -7  -3    7.13    1.03
   0  -7  -3    7.03    1.36
   0  -7  -3    7.51    1.08
   0   7   2   -1.19    1.22
   0   7   2   -0.04    1.29
   0   7   2    0.15    0.87
   0  -7  -2   -0.82    0.90
   0  -7  -2   -1.88    1.19
   0  -7  -2    0.97    1.02
   0  -7  -2   -0.60    1.32
   0   7   1   73.53    2.74
   0   7   1   73.62    2.54
   0   7   1   73.85    2.54
   0   7   1   72.01    2.86
   0  -7  -1   74.08    2.53
   0  -7  -1   77.59    2.95
   0  -7  -1   71.93    2.80
   0   7   0   -0.74    0.91
   0   7   0   -0.15    1.27
   0   7   0   -0.51    0.89
   0   7   0   -0.88    1.20
   0  -7   0   -1.62    1.00
   0  -7   0   -0.48    1.30
   0  -7   0   -0.93    0.86
   0  -7   0   -2.74    1.13
   0   7  -1   74.98    3.00
   0   7  -1   73.21    2.64
   0   7  -1   82.18    2.63
   0   7  -1   76.10    2.85
   0  -7   1   82.38    2.72
   0  -7   1   76.19    2.69
   0  -7   1   73.16    2.54
   0  -7   1   76.27    3.03
   0   7  -2    1.20    1.26
   0   7  -2    0.86    0.95
   0   7  -2    0.21    0.95
   0   7  -2   -3.16    1.26
   0  -7   2   -0.38    1.31
   0  -7   2    0.07    0.97
   0  -7   2   -0.48    0.80
   0   7  -3    7.97    1.45
   0   7  -3    8.39    1.37
   0   7  -3    8.84    1.08
   0  -7   3    9.34    1.57
   0   7  -4   12.62    1.50
   0  -7   4   11.02    1.52
   0   7  -5   23.08    2.33
   0  -7   5   23.00    2.42
   0   7  -6   -0.90    1.48
   0  -7   6   -2.22    1.62
   0   7  -7   97.42    3.98
   0  -7   7  106.24    4.17
   0   7  -8   16.00    2.06
   0   7  -9    3.61    2.04
   0   7 -10   -0.91    2.24
   0   7 -11    9.08    2.60
   0   7 -11    9.07    2.65
   0   7 -12    1.43    2.79
   0   7 -12   -5.73    4.25
   0   7 -13   19.80    3.40
   0   8  13    0.56    2.72
   0   8  12    5.37    2.68
   0   8  11    8.82    2.20
   0   8  10    2.03    1.97
   0   8   9    5.74    1.89
   0   8   8   12.95    1.82
   0   8   7    1.04    1.55
   0   8   6   33.56    2.37
   0  -8  -6   31.46    2.34
   0   8   5   33.90    2.28
   0   8   5   35.59    2.35
   0  -8  -5   32.53    1.92
   0   8   4    1.30    1.27
   0   8   4    3.16    1.54
   0  -8  -4    0.50    1.44
   0  -8  -4    1.64    1.12
   0  -8  -4    1.54    1.05
   0   8   3   20.58    2.10
   0  -8  -3   25.39    1.80
   0  -8  -3   21.59    1.80
   0  -8  -3   21.81    1.69
   0  -8  -3   20.45    1.96
   0   8   2   24.90    1.63
   0   8   2   21.79    2.16
   0   8   2   24.15    1.60
   0  -8  -2   18.26    1.96
   0  -8  -2   21.88    2.15
   0  -8  -2   20.19    1.61
   0   8   1    7.08    2.14
   0   8   1    4.83    1.01
   0   8   1    7.53    1.02
   0   8   1    5.75    1.33
   0  -8  -1    7.14    1.47
   0  -8  -1    6.65    1.38
   0  -8  -1    6.47    1.02
   0   8   0   45.44    3.23
   0   8   0   57.68    2.22
   0   8   0   55.80    2.60
   0  -8   0   56.29    2.40
   0  -8   0   54.89    2.17
   0  -8   0   57.42    2.70
   0   8  -1    6.01    1.07
   0   8  -1    5.67    2.37
   0   8  -1    5.24    1.41
   0   8  -1    5.81    1.43
   0  -8   1    6.16    1.17
   0  -8   1    6.37    1.01
   0  -8   1    7.18    1.23
   0   8  -2   20.24    1.71
   0   8  -2   23.36    1.70
   0   8  -2   19.38    2.05
   0   8  -2   21.62    2.05
   0  -8   2   22.01    2.24
   0  -8   2   23.19    1.47
   0  -8   2   21.51    1.81
   0   8  -3   24.92    2.26
   0   8  -3   23.78    1.76
   0   8  -3   22.11    2.14
   0   8  -3   23.96    1.81
   0  -8   3   21.54    2.37
   0   8  -4    1.61    1.54
   0   8  -4    2.01    1.41
   0   8  -4    1.84    1.15
   0  -8   4    1.39    1.52
   0   8  -5   37.79    2.65
   0   8  -5   37.33    2.50
   0  -8   5   34.99    2.73
   0   8  -6   33.03    2.73
   0  -8   6   29.99    3.02
   0   8  -7    0.09    1.78
   0  -8   7    2.41    2.02
   0   8  -8   19.69    2.24
   0  -8   8   19.05    2.53
   0   8  -9    7.94    2.21
   0   8 -10   -1.44    2.29
   0   8 -11    8.78    2.63
   0   8 -11   10.12    2.67
   0   8 -12   11.53    2.99
   0   8 -13    4.25    4.06
   0   9  12    2.93    2.59
   0   9  11    3.78    2.50
   0   9  10    2.57    2.02
   0   9   9    0.34    1.82
   0   9   8    8.57    1.91
   0   9   7   29.90    2.62
   0   9   6    7.04    1.90
   0   9   6    5.60    1.53
   0  -9  -6    6.79    1.49
   0  -9  -6    7.74    1.90
   0  -9  -6   11.21    1.78
   0  -9  -6    6.48    1.32
   0   9   5   21.37    1.96
   0   9   5   16.82    1.71
   0  -9  -5   20.40    1.98
   0  -9  -5   19.47    1.54
   0  -9  -5   15.01    1.37
   0  -9  -5   17.51    1.79
   0   9   4    6.55    1.71
   0   9   4    4.24    1.38
   0  -9  -4    6.56    1.29
   0  -9  -4    5.60    1.14
   0  -9  -4    8.26    1.62
   0  -9  -4    9.50    1.78
   0   9   3   -2.22    1.49
   0   9   3   -0.48    1.36
   0  -9  -3   -1.21    2.31
   0  -9  -3   -1.76    1.38
   0  -9  -3    1.13    1.03
   0   9   2   16.22    1.63
   0   9   2   11.52    1.58
   0   9   2   14.80    1.67
   0   9   2   16.78    1.65
   0  -9  -2   10.91    1.58
   0  -9  -2   12.80    1.24
   0  -9  -2   13.96    1.74
   0   9   1   55.65    2.26
   0   9   1   50.89    2.71
   0   9   1   53.35    2.25
   0   9   1   51.82    2.54
   0  -9  -1   54.19    2.24
   0  -9  -1   53.49    2.40
   0  -9  -1   56.88    2.83
   0  -9  -1   50.17    2.52
   0   9   0   -0.20    1.47
   0   9   0   -0.41    0.99
   0   9   0   -0.52    1.33
   0   9   0    0.30    1.06
   0  -9   0    0.44    1.20
   0  -9   0   -1.13    1.53
   0  -9   0    0.42    0.99
   0   9  -1   54.62    2.34
   0   9  -1   52.81    2.77
   0   9  -1   53.31    2.61
   0   9  -1   52.24    2.31
   0  -9   1   53.34    2.19
   0  -9   1   57.50    2.51
   0  -9   1   57.65    2.89
   0  -9   1   53.50    2.44
   0   9  -2   13.02    1.30
   0   9  -2   12.68    1.59
   0   9  -2   15.06    1.73
   0   9  -2   12.31    1.27
   0  -9   2   11.11    1.66
   0  -9   2   12.19    1.11
   0  -9   2   13.32    1.62
   0  -9   2   16.94    1.46
   0   9  -3    1.28    1.18
   0   9  -3   -1.37    1.10
   0   9  -3    0.70    1.39
   0   9  -3    0.82    1.58
   0  -9   3   -0.45    1.18
   0  -9   3   -2.48    1.55
   0   9  -4    7.27    1.64
   0   9  -4    8.52    1.26
   0   9  -4    7.39    1.34
   0   9  -4    9.66    1.80
   0  -9   4    6.86    1.72
   0   9  -5   22.43    2.13
   0   9  -5   20.37    1.93
   0   9  -5   21.75    2.16
   0  -9   5   18.32    2.11
   0   9  -6   11.47    1.88
   0   9  -6   10.08    2.08
   0  -9   6   10.72    2.10
   0   9  -7   35.72    3.08
   0   9  -7   36.23    3.13
   0  -9   7   30.89    3.57
   0   9  -8   13.71    2.28
   0  -9   8   18.41    2.73
   0   9  -9   -3.20    2.20
   0   9 -10    2.67    2.49
   0   9 -11    4.71    2.77
   0  10  12    3.30    2.63
   0  10  11    4.59    2.36
   0  10  10   -0.31    2.27
   0  10   9    4.81    2.04
   0  10   8    1.09    1.81
   0  10   7   -0.11    1.64
   0 -10  -7    1.05    1.38
   0  10   6    3.01    1.54
   0  10   6    4.13    2.10
   0 -10  -6    1.88    1.36
   0 -10  -6    0.83    1.82
   0 -10  -6    1.10    1.58
   0  10   5   12.46    1.76
   0  10   5   12.05    2.09
   0 -10  -5   12.56    1.61
   0 -10  -5   12.82    2.12
   0 -10  -5   10.53    1.39
   0 -10  -5   10.77    1.82
   0  10   4   -0.87    1.46
   0  10   4    2.61    1.84
   0 -10  -4    1.56    1.25
   0 -10  -4   -0.62    1.86
   0 -10  -4    0.55    1.60
   0  10   3   19.92    1.84
   0  10   3   22.93    1.96
   0  10   3   22.09    1.85
   0 -10  -3   21.46    2.23
   0 -10  -3   21.70    1.93
   0 -10  -3   25.63    2.70
   0  10   2    6.61    1.70
   0  10   2    7.77    1.20
   0  10   2    6.18    1.19
   0  10   2    5.61    1.60
   0 -10  -2    4.49    1.57
   0 -10  -2    5.73    1.21
   0 -10  -2    6.68    1.82
   0  10   1   30.81    2.52
   0  10   1   27.71    1.94
   0  10   1   28.64    2.01
   0  10   1   27.36    2.31
   0 -10  -1   33.09    2.77
   0 -10  -1   29.57    1.94
   0 -10  -1   28.97    2.21
   0  10   0    2.29    1.50
   0  10   0    1.53    1.17
   0  10   0    1.04    1.13
   0  10   0    2.45    1.61
   0 -10   0    2.89    1.11
   0 -10   0    4.24    1.69
   0 -10   0    1.56    1.52
   0 -10   0    0.85    1.33
   0  10  -1   29.77    2.11
   0  10  -1   28.61    2.43
   0  10  -1   32.44    2.47
   0  10  -1   26.61    2.00
   0 -10   1   29.37    2.95
   0 -10   1   29.24    2.21
   0 -10   1   29.90    2.79
   0 -10   1   29.26    1.89
   0  10  -2    6.48    1.76
   0  10  -2    5.49    1.24
   0  10  -2    5.13    1.31
   0  10  -2    3.70    1.63
   0 -10   2    5.02    1.73
   0 -10   2    5.31    1.07
   0 -10   2    7.74    1.35
   0 -10   2    7.11    1.49
   0  10  -3   24.87    2.19
   0  10  -3   27.55    2.65
   0  10  -3   24.54    2.01
   0  10  -3   23.42    2.54
   0 -10   3   20.54    2.12
   0  10  -4    1.07    1.26
   0  10  -4   -1.33    1.66
   0  10  -4    4.07    1.47
   0  10  -4   -0.25    1.96
   0 -10   4   -1.56    1.82
   0  10  -5   13.88    1.69
   0  10  -5   15.60    1.95
   0  10  -5   14.51    2.20
   0  10  -5   11.19    1.49
   0 -10   5   10.74    2.21
   0  10  -6    4.75    2.24
   0  10  -6    2.83    1.90
   0  10  -6    3.42    1.65
   0 -10   6    0.35    2.25
   0  10  -7    0.17    2.37
   0  10  -7   -1.00    1.97
   0 -10   7   -6.05    2.45
   0  10  -8   10.14    2.70
   0  10  -8    5.46    2.26
   0 -10   8    5.61    2.79
   0  10  -9    7.00    2.53
   0  10  -9    8.96    2.91
   0 -10   9    4.35    3.10
   0  10 -10    5.22    3.10
   0  10 -10    1.03    2.75
   0  10 -11   15.47    4.16
   0  10 -12    1.46    3.25
   0  11  11   -2.23    2.43
   0  11  10    0.40    2.45
   0  11   9   -1.64    2.13
   0  11   8   10.91    2.10
   0 -11  -8   13.32    2.15
   0  11   7   -0.02    1.77
   0 -11  -7    0.31    1.99
   0 -11  -7   -0.45    1.89
   0  11   6    2.67    1.65
   0  11   6    1.78    2.29
   0 -11  -6    0.55    1.94
   0 -11  -6   -0.83    1.78
   0 -11  -6    0.11    2.30
   0 -11  -6   -0.17    1.46
   0  11   5    0.34    1.64
   0  11   5   -0.73    2.20
   0 -11  -5    1.14    1.86
   0 -11  -5   -0.05    2.19
   0 -11  -5   -0.45    1.46
   0  11   4   22.74    2.42
   0  11   4   25.50    2.84
   0 -11  -4   29.63    3.11
   0 -11  -4   22.89    2.56
   0 -11  -4   24.32    2.21
   0  11   3   -0.95    1.66
   0  11   3    1.71    1.23
   0  11   3    0.12    1.85
   0  11   3    2.09    1.28
   0 -11  -3    0.90    1.25
   0 -11  -3    5.06    2.01
   0 -11  -3    0.69    1.72
   0  11   2   44.31    2.97
   0  11   2   53.27    2.47
   0  11   2   47.66    2.46
   0  11   2   55.72    3.11
   0 -11  -2   46.74    2.76
   0 -11  -2   49.39    3.33
   0 -11  -2   48.55    2.49
   0 -11  -2   48.50    2.75
   0  11   1    0.86    1.22
   0  11   1    1.20    1.83
   0  11   1   -0.20    1.65
   0  11   1    1.19    1.33
   0 -11  -1    0.68    1.21
   0 -11  -1   -0.40    1.96
   0 -11  -1   -0.54    1.49
   0  11   0    1.00    1.29
   0  11   0    1.70    1.75
   0  11   0   -2.27    1.61
   0  11   0    0.86    1.22
   0 -11   0    0.80    1.67
   0 -11   0    0.29    1.24
   0 -11   0    1.63    1.93
   0 -11   0    1.86    1.52
   0  11  -1   -1.19    1.21
   0  11  -1    0.32    1.86
   0  11  -1    0.30    1.35
   0  11  -1    0.35    1.67
   0 -11   1   -0.92    1.14
   0 -11   1   -1.90    1.95
   0 -11   1    0.51    1.50
   0 -11   1   -0.38    1.59
   0  11  -2   54.56    3.07
   0  11  -2   52.69    3.16
   0  11  -2   49.48    2.70
   0  11  -2   51.52    2.50
   0 -11   2   44.23    2.35
   0 -11   2   56.46    2.83
   0 -11   2   50.29    2.77
   0 -11   2   54.38    3.36
   0  11  -3    3.45    2.04
   0  11  -3   -1.78    1.50
   0  11  -3    1.84    1.33
   0  11  -3    1.04    1.81
   0 -11   3   -0.02    2.06
   0  11  -4   30.04    3.11
   0  11  -4   28.88    2.84
   0  11  -4   22.87    2.27
   0  11  -4   23.94    1.95
   0 -11   4   23.11    2.38
   0  11  -5   -0.71    1.93
   0  11  -5   -0.56    1.41
   0  11  -5    0.38    2.29
   0  11  -5   -0.50    1.71
   0 -11   5   -1.35    2.31
   0  11  -6    1.54    1.50
   0  11  -6    1.20    1.96
   0  11  -6   -0.92    2.56
   0 -11   6   -0.20    2.48
   0  11  -7    1.87    2.19
   0  11  -7    2.55    2.74
   0 -11   7   -1.73    2.80
   0  11  -8   14.49    2.56
   0  11  -8   12.36    3.13
   0 -11   8   15.21    2.96
   0  11  -9    6.99    3.05
   0  11  -9   -0.32    2.57
   0  11 -11   -3.99    3.10
   0  12  10   -1.06    2.38
   0  12   9    8.79    2.50
   0 -12  -9    6.80    1.99
   0  12   8   -1.16    2.00
   0  12   8   -3.66    3.13
   0 -12  -8   -1.15    2.19
   0 -12  -8    1.54    2.36
   0  12   7    1.20    1.93
   0  12   7   -5.88    2.80
   0 -12  -7    1.18    2.21
   0 -12  -7    1.02    1.68
   0 -12  -7    3.16    2.71
   0  12   6    0.29    2.59
   0  12   6    7.24    1.83
   0 -12  -6    4.65    2.17
   0 -12  -6   11.40    1.73
   0 -12  -6    9.83    2.61
   0  12   5    2.88    1.71
   0  12   5    2.52    2.52
   0 -12  -5    1.80    2.00
   0 -12  -5   -2.82    2.34
   0 -12  -5    1.40    1.52
   0  12   4    3.86    2.36
   0  12   4    5.23    1.70
   0 -12  -4    3.69    2.37
   0 -12  -4    1.64    1.46
   0 -12  -4    0.80    2.01
   0  12   3    1.33    1.37
   0  12   3    0.74    1.93
   0  12   3   -0.10    1.38
   0  12   3   -0.99    2.13
   0 -12  -3    0.47    1.45
   0 -12  -3    3.64    2.26
   0 -12  -3   -1.41    1.84
   0 -12  -3    0.39    1.80
   0  12   2    1.88    1.35
   0  12   2   -0.01    2.10
   0  12   2    4.31    1.97
   0  12   2    3.09    1.46
   0 -12  -2    0.01    2.24
   0 -12  -2    1.93    1.43
   0 -12  -2    3.90    1.82
   0  12   1    1.37    1.46
   0  12   1    3.53    1.33
   0  12   1    0.83    2.04
   0  12   1    0.15    1.86
   0 -12  -1   -1.07    2.19
   0 -12  -1    0.44    1.76
   0 -12  -1    1.10    1.37
   0  12   0   24.54    2.18
   0  12   0   19.92    1.78
   0  12   0   17.72    2.13
   0  12   0   21.19    2.30
   0 -12   0   20.47    1.96
   0 -12   0   22.82    2.44
   0 -12   0   18.56    1.63
   0 -12   0   26.34    2.85
   0  12  -1    1.25    1.86
   0  12  -1    3.16    2.15
   0  12  -1    2.20    1.38
   0  12  -1    0.13    1.53
   0 -12   1   -0.13    1.32
   0 -12   1    5.58    1.87
   0 -12   1    0.45    1.69
   0 -12   1    0.07    2.21
   0  12  -2    1.97    1.89
   0  12  -2    3.84    1.66
   0  12  -2    2.54    1.39
   0  12  -2   -0.02    2.20
   0 -12   2    4.25    2.29
   0 -12   2    2.69    1.31
   0 -12   2    4.62    1.75
   0 -12   2    1.85    1.79
   0  12  -3   -0.18    2.28
   0  12  -3   -2.14    1.87
   0  12  -3    3.20    1.42
   0  12  -3    0.62    1.71
   0 -12   3   -0.73    2.36
   0  12  -4    4.04    1.85
   0  12  -4    2.81    1.97
   0  12  -4    5.05    2.56
   0  12  -4    2.79    1.53
   0 -12   4    5.14    2.43
   0  12  -5    3.81    1.98
   0  12  -5   -0.11    1.86
   0  12  -5   -1.49    2.69
   0  12  -5   -0.05    1.58
   0 -12   5    0.05    2.59
   0  12  -6   11.23    2.97
   0  12  -6    6.06    2.18
   0  12  -6    9.66    1.75
   0  12  -6    7.83    2.21
   0 -12   6    5.82    2.77
   0  12  -7    5.87    3.00
   0  12  -7    2.57    2.32
   0  12  -7    4.12    2.35
   0  12  -7    2.15    1.69
   0 -12   7   -2.09    3.56
   0  12  -8    6.40    3.80
   0  12  -8    2.01    2.60
   0  12 -10    0.09    3.10
   0  13  10   -1.57    2.61
   0  13   9    4.99    4.75
   0  13   9   -5.34    2.36
   0 -13  -9    1.28    2.17
   0  13   8    1.13    2.28
   0  13   8   -2.19    3.31
   0 -13  -8    2.53    1.97
   0 -13  -8    1.58    2.60
   0 -13  -8    2.85    3.37
   0  13   7    5.42    3.22
   0  13   7   10.84    2.24
   0 -13  -7    7.01    1.94
   0 -13  -7   12.06    2.50
   0 -13  -7    5.56    3.03
   0  13   6    2.76    1.94
   0  13   6    4.75    2.95
   0 -13  -6    2.99    2.79
   0 -13  -6   -0.25    1.73
   0 -13  -6    2.73    2.29
   0  13   5    0.11    2.81
   0  13   5    3.61    1.96
   0 -13  -5   -1.79    2.75
   0 -13  -5    5.54    2.27
   0 -13  -5    4.35    1.79
   0  13   4    3.10    1.78
   0  13   4    2.66    2.59
   0 -13  -4    3.01    2.07
   0 -13  -4    0.33    2.60
   0 -13  -4    0.81    2.07
   0 -13  -4    4.81    1.69
   0  13   3   -0.16    1.59
   0  13   3    0.53    1.42
   0  13   3   -4.27    2.34
   0  13   3    0.13    2.12
   0 -13  -3   -1.71    2.55
   0 -13  -3   -0.55    1.54
   0 -13  -3   -0.30    2.05
   0  13   2    8.14    2.47
   0  13   2    4.13    2.10
   0  13   2    7.76    1.71
   0  13   2    2.17    1.47
   0 -13  -2    4.38    2.60
   0 -13  -2    4.42    1.50
   0 -13  -2    6.82    2.08
   0  13   1    2.06    1.45
   0  13   1    0.51    2.06
   0  13   1    2.94    1.70
   0  13   1    3.07    2.33
   0 -13  -1    2.80    2.56
   0 -13  -1    3.63    2.28
   0 -13  -1    2.39    1.52
   0 -13  -1    0.41    2.03
   0  13   0    0.85    2.02
   0  13   0    1.12    1.78
   0  13   0    0.32    2.32
   0  13   0   -1.14    1.38
   0 -13   0    1.53    2.16
   0 -13   0    4.88    2.02
   0 -13   0   -0.30    1.44
   0 -13   0    2.12    2.51
   0  13  -1   -1.31    2.02
   0  13  -1    1.00    1.49
   0  13  -1    0.55    2.39
   0  13  -1   -0.49    1.74
   0 -13   1    0.27    2.11
   0 -13   1    4.02    1.96
   0 -13   1    2.11    1.42
   0 -13   1    0.24    2.42
   0  13  -2    9.63    2.64
   0  13  -2    6.94    2.08
   0  13  -2    5.24    1.57
   0  13  -2    4.22    1.87
   0 -13   2    3.96    1.50
   0 -13   2    6.36    2.13
   0 -13   2    8.57    2.65
   0 -13   2    2.55    2.00
   0  13  -3    3.59    2.59
   0  13  -3   -2.44    1.93
   0  13  -3   -3.04    2.13
   0  13  -3   -1.81    1.48
   0 -13   3   -5.79    2.62
   0  13  -4   10.88    2.12
   0  13  -4    4.03    2.78
   0  13  -4    3.27    1.64
   0  13  -4    7.14    2.23
   0 -13   4    5.96    2.71
   0  13  -5    1.54    2.79
   0  13  -5    4.16    2.28
   0  13  -5    3.46    2.14
   0  13  -5    3.38    1.73
   0 -13   5    1.48    2.71
   0  13  -6    4.93    2.24
   0  13  -6    5.97    3.86
   0  13  -6    3.19    1.78
   0  13  -6    4.58    2.40
   0  13  -7    7.95    1.97
   0  13  -7   11.84    2.71
   0  13  -8    2.50    2.87
   0  13  -9   -2.08    2.94
   0  13 -10    5.07    3.21
   0  14   9    1.08    2.58
   0  14   8    5.37    2.47
   0 -14  -8    6.43    2.63
   0 -14  -8    6.02    2.82
   0  14   7    1.88    2.28
   0 -14  -7    5.20    2.80
   0 -14  -7    0.56    3.16
   0 -14  -7    3.90    2.65
   0  14   6    8.03    2.88
   0 -14  -6    8.31    3.29
   0 -14  -6   10.39    2.58
   0 -14  -6    5.63    2.11
   0  14   5   -4.55    2.87
   0  14   5   -1.48    2.05
   0 -14  -5   -2.40    2.29
   0 -14  -5   -0.45    1.87
   0 -14  -5   -4.46    3.13
   0  14   4    1.25    2.01
   0  14   4   -2.14    2.73
   0 -14  -4   -2.48    3.02
   0 -14  -4   -0.79    1.76
   0  14   3    3.47    1.90
   0  14   3    0.01    2.33
   0  14   3    3.12    2.65
   0  14   3   -0.18    1.57
   0 -14  -3   -3.14    3.15
   0 -14  -3   -1.04    3.02
   0 -14  -3    4.51    1.82
   0  14   2    5.19    1.61
   0  14   2    5.48    1.93
   0  14   2    5.36    2.62
   0  14   2    7.57    2.34
   0 -14  -2    4.25    2.95
   0 -14  -2    5.57    1.78
   0 -14  -2    3.62    2.18
   0  14   1    8.00    2.65
   0  14   1    4.29    1.93
   0  14   1    6.28    1.68
   0  14   1    4.53    2.32
   0 -14  -1    7.30    1.73
   0 -14  -1    5.95    2.24
   0 -14  -1    2.52    2.93
   0 -14  -1    7.44    2.64
   0  14   0   13.92    2.49
   0  14   0   10.90    1.70
   0  14   0    6.85    2.01
   0  14   0    9.74    2.63
   0 -14   0    8.17    2.38
   0 -14   0   16.11    2.63
   0 -14   0    6.85    1.70
   0 -14   0   10.01    2.94
   0  14  -1    1.45    1.98
   0  14  -1    8.37    2.53
   0  14  -1    6.17    1.65
   0  14  -1    7.44    2.39
   0 -14   1    7.98    2.47
   0 -14   1    4.70    1.68
   0 -14   1    4.60    2.29
   0 -14   1    4.25    2.88
   0  14  -2    6.71    2.64
   0  14  -2    6.58    2.33
   0  14  -2    4.39    1.97
   0  14  -2    4.77    1.67
   0 -14   2    5.23    1.64
   0 -14   2    1.04    2.75
   0 -14   2    9.79    2.49
   0 -14   2    5.35    2.31
   0  14  -3    1.77    1.66
   0  14  -3    3.23    2.33
   0 -14   3    0.53    3.28
   0  14  -4   -1.36    2.42
   0  14  -4    2.20    1.80
   0  14  -5    0.84    1.82
   0  14  -5   -1.03    2.57
   0  14  -6    4.89    4.43
   0  14  -6    8.04    1.99
   0  14  -7    4.70    2.82
   0  14  -7    3.10    2.04
   0  14  -8   10.11    2.90
   0  14  -8    8.54    3.41
   0  14  -9   -0.76    2.94
   0  15   7    0.05    2.29
   0 -15  -7    3.11    2.34
   0  15   6    1.29    2.22
   0 -15  -6    2.96    3.25
   0 -15  -6    0.83    2.24
   0  15   5   -0.66    2.22
   0 -15  -5    1.01    2.14
   0  15   4    1.56    2.75
   0 -15  -4   -8.78    3.79
   0  15   3   -0.92    2.68
   0  15   3    0.02    1.78
   0 -15  -3    0.03    3.44
   0 -15  -3   -1.57    2.23
   0  15   2   -2.07    1.76
   0  15   2    1.02    2.66
   0  15   2   -1.38    1.93
   0 -15  -2    1.05    1.86
   0 -15  -2    2.94    2.77
   0 -15  -2    0.36    3.62
   0  15   1    7.82    2.79
   0  15   1    4.79    1.81
   0 -15  -1    4.21    1.91
   0 -15  -1    0.79    4.73
   0 -15  -1   11.25    2.96
   0  15   0    0.68    2.58
   0  15   0    1.02    1.71
   0 -15   0    2.49    2.89
   0 -15   0    0.82    1.85
   0  15  -1    7.72    2.67
   0  15  -1    5.49    1.82
   0 -15   1    3.61    2.44
   0 -15   1    8.73    1.92
   0 -15   1   12.62    2.88
   0  15  -2   -0.40    2.58
   0  15  -2   -0.21    1.76
   0 -15   2    0.69    1.81
   0 -15   2    3.26    2.54
   0 -15   2    0.29    2.68
   0  15  -3    2.03    2.85
   0  15  -3    4.61    2.00
   0 -15   3    6.70    2.66
   0 -15   3   -0.03    2.44
   0 -15   3    1.88    1.76
   0  15  -4   -3.75    3.22
   0  15  -5   -0.64    2.86
   0  15  -5    2.95    3.02
   0  15  -6    0.87    2.06
   0  15  -6   -2.93    2.83
   0  15  -7    2.11    3.15
   0  15  -7    3.59    2.10
   0  16   6   -0.72    2.34
   0 -16  -6    1.67    2.40
   0  16   5    5.90    2.42
   0 -16  -5    7.23    2.38
   0  16   4   -1.13    2.31
   0 -16  -4   -1.33    2.20
   0  16   3    8.99    3.43
   0  16   3    5.36    2.11
   0 -16  -3    9.09    2.17
   0  16   2   10.79    3.51
   0 -16  -2    4.50    2.12
   0  16   1    3.18    2.14
   0  16   1    2.34    5.01
   0 -16  -1    7.87    2.16
   0  16   0    9.71    2.06
   0 -16   0    6.16    2.75
   0 -16   0   10.68    3.15
   0  16  -1    2.71    1.98
   0  16  -1    3.91    3.20
   0 -16   1    8.22    3.24
   0 -16   1    2.53    2.86
   0  16  -2    5.81    3.01
   0  16  -2    4.02    2.01
   0 -16   2    4.76    3.06
   0 -16   2    4.32    2.08
   0  16  -3    5.59    2.93
   0  16  -3    3.56    1.98
   0 -16   3    6.01    3.07
   0  16  -4    0.70    2.05
   0  16  -4   -2.65    2.92
   0  16  -5   11.24    3.06
   0  16  -5    4.87    2.15
   0  16  -6   -2.41    2.18
   0  16  -6   -1.25    3.21
   0  17   3   -0.39    2.25
   0  17   3    8.97    3.64
   0 -17  -3   -6.14    2.23
   0  17   2   -0.51    2.20
   0  17   2    4.40    3.43
   0 -17  -2    5.48    2.36
   0  17   1   -3.13    3.32
   0  17   1   -2.31    2.06
   0 -17  -1    3.72    2.35
   0  17   0    1.34    2.13
   0  17   0    2.93    3.33
   0 -17   0    4.48    2.30
   0  17  -1    0.61    2.10
   0  17  -1   -0.57    3.18
   0 -17   1   -1.24    2.46
   0  17  -2    2.34    2.14
   0  17  -2    3.24    3.32
   0 -17   2    1.76    3.40
   0 -17   2    2.95    2.35
   0  17  -3    2.84    2.16
   0  17  -3    0.30    3.39
   0 -17   3   -5.24    3.33
   1  17  -3   -0.60    2.13
   1  17  -3    3.43    3.38
  -1 -17   2   12.93    3.61
   1  17  -2    6.35    2.17
   1  17  -2   -2.86    3.17
  -1 -17   1    6.69    3.75
  -1 -17   1   -1.39    2.36
   1  17  -1    2.93    3.23
   1  17  -1   -0.84    2.19
  -1 -17   0    5.25    2.32
   1  17   0    1.39    2.10
   1  17   0    3.01    3.17
  -1 -17  -1   -4.54    2.35
   1  17   1    3.85    3.33
   1  17   1   -1.25    2.09
  -1 -17  -2    3.34    2.36
   1  17   2   -1.73    2.21
   1  17   2    6.26    3.43
  -1 -17  -3    4.59    2.41
   1  17   3   -1.25    2.45
   1  16  -6   -0.83    3.11
   1  16  -6    1.12    2.17
   1  16  -5    7.01    2.11
   1  16  -5    1.73    3.01
   1  16  -4    0.42    2.05
   1  16  -4    3.40    2.81
  -1 -16   3    5.52    2.10
   1  16  -3   11.22    2.99
   1  16  -3    5.24    2.01
  -1 -16   2    1.15    2.00
  -1 -16   2   -0.60    3.20
   1  16  -2    6.87    3.00
   1  16  -2    1.71    2.00
  -1 -16   1    3.30    3.26
   1  16  -1    5.10    2.94
   1  16  -1   -0.43    1.96
  -1 -16   0    6.84    3.18
  -1 -16   0    1.44    2.25
   1  16   0    3.09    1.98
   1  16   0    4.49    3.32
  -1 -16  -1   15.80    3.37
  -1 -16  -1    5.20    2.21
   1  16   1   13.81    5.09
   1  16   1    5.37    2.10
  -1 -16  -2    3.77    2.20
  -1 -16  -3    8.92    2.20
   1  16   3    3.70    2.35
   1  16   3    5.89    2.15
  -1 -16  -4   -0.99    2.14
   1  16   4   -0.37    2.22
  -1 -16  -5   -5.20    2.16
   1  16   5   -0.87    2.16
   1  15  -7   13.33    3.20
   1  15  -7   12.72    2.20
   1  15  -6   -0.97    2.88
   1  15  -6   -3.04    2.00
   1  15  -5    7.06    2.82
   1  15  -5    0.19    3.15
   1  15  -4   -3.41    3.90
   1  15  -3   -1.17    1.92
   1  15  -3   -4.76    2.86
  -1 -15   2    0.82    1.77
  -1 -15   2    2.54    2.50
   1  15  -2    0.47    1.78
   1  15  -2    5.36    2.68
  -1 -15   1    9.25    2.89
  -1 -15   1    0.97    2.44
  -1 -15   1   10.59    1.97
   1  15  -1    8.87    2.62
   1  15  -1   10.33    1.87
  -1 -15   0    3.31    2.83
  -1 -15   0   -1.25    1.90
   1  15   0    0.75    2.62
   1  15   0   -1.34    1.71
  -1 -15  -1    8.55    3.04
  -1 -15  -1   14.05    2.07
   1  15   1    8.13    2.68
   1  15   1    8.75    1.86
  -1 -15  -2    2.84    1.87
   1  15   2    1.66    2.69
   1  15   2    2.04    1.85
   1  15   2    0.96    1.99
  -1 -15  -3    1.78    2.90
   1  15   3    5.86    2.06
   1  15   3    2.63    2.77
   1  15   3   -0.54    2.33
  -1 -15  -4    1.08    2.79
   1  15   4   -3.66    2.30
  -1 -15  -5    3.83    2.15
   1  15   5    2.97    2.16
  -1 -15  -6   -3.27    2.23
   1  15   6   -2.05    2.28
  -1 -15  -7    1.07    2.30
   1  15   7    1.29    2.35
   1  14  -9    3.47    2.95
   1  14  -9    4.87    3.10
   1  14  -8    3.98    2.99
   1  14  -8    7.73    2.78
   1  14  -7   -1.45    2.80
   1  14  -7    1.91    1.93
   1  14  -6    7.67    1.97
   1  14  -5    1.49    1.83
   1  14  -5   -0.61    2.39
   1  14  -4   -0.80    1.75
   1  14  -4    0.67    2.39
  -1 -14   3    2.43    4.13
   1  14  -3    1.21    2.26
   1  14  -3    2.63    1.68
   1  14  -3    0.59    3.04
  -1 -14   2   -3.37    2.22
  -1 -14   2   -0.42    1.52
  -1 -14   2    2.45    2.69
  -1 -14   2    1.49    2.35
   1  14  -2    0.87    1.61
   1  14  -2    1.81    2.25
   1  14  -2    4.77    2.76
   1  14  -2    1.18    1.92
  -1 -14   1   -0.49    2.77
  -1 -14   1    3.22    2.45
  -1 -14   1   -0.33    1.65
  -1 -14   1   -0.19    2.30
   1  14  -1    6.66    2.60
   1  14  -1    2.68    1.59
   1  14  -1   -4.08    1.91
   1  14  -1    0.79    2.34
  -1 -14   0    9.79    3.02
  -1 -14   0    8.59    2.42
  -1 -14   0   13.34    2.58
  -1 -14   0    8.49    1.75
   1  14   0    5.64    2.00
   1  14   0   12.97    2.74
   1  14   0    8.79    2.43
   1  14   0    9.31    1.72
  -1 -14  -1    7.22    2.29
  -1 -14  -1    3.07    3.03
  -1 -14  -1    5.59    1.71
   1  14   1    2.66    1.65
   1  14   1    4.21    2.40
   1  14   1    5.64    2.01
   1  14   1    3.10    2.68
  -1 -14  -2    6.67    2.18
  -1 -14  -2    4.73    1.73
  -1 -14  -2    3.45    3.06
   1  14   2    6.63    1.92
   1  14   2    7.46    1.66
   1  14   2    4.77    2.75
   1  14   2    7.84    2.41
  -1 -14  -3    0.03    1.77
  -1 -14  -3   -1.57    3.04
   1  14   3    1.13    1.89
   1  14   3    0.18    2.73
   1  14   3   -2.46    2.35
   1  14   3   -0.29    1.56
  -1 -14  -4   -4.77    3.06
  -1 -14  -4   -0.64    1.80
   1  14   4   -1.59    1.97
   1  14   4    2.64    2.79
  -1 -14  -5   -3.55    3.06
  -1 -14  -5    0.23    1.91
   1  14   5   -9.48    2.84
   1  14   5    0.81    2.06
  -1 -14  -6    6.49    2.16
  -1 -14  -6   -1.29    3.01
   1  14   6    6.48    2.33
   1  14   6    5.18    3.10
  -1 -14  -7    2.62    2.60
   1  14   7    1.56    4.49
   1  14   7    0.30    2.16
  -1 -14  -8    7.27    2.40
   1  14   8    5.06    2.48
   1  13 -10    2.86    3.12
   1  13  -9   -0.21    2.85
   1  13  -8    1.57    1.92
   1  13  -8    2.21    3.92
   1  13  -7    8.95    1.90
   1  13  -7    7.11    2.68
   1  13  -6    0.95    1.66
   1  13  -6    1.13    2.45
   1  13  -6   -1.16    2.19
  -1 -13   5    7.05    2.68
   1  13  -5    9.31    2.95
   1  13  -5    6.59    2.16
   1  13  -5    6.97    2.41
   1  13  -5    6.23    1.70
  -1 -13   4   -0.42    3.07
   1  13  -4    6.33    2.82
   1  13  -4    1.98    1.55
   1  13  -4    2.25    2.08
   1  13  -4    1.72    2.17
  -1 -13   3    2.77    2.70
  -1 -13   3   -1.05    1.32
   1  13  -3    3.58    2.69
   1  13  -3   -1.64    1.97
   1  13  -3    1.32    1.52
   1  13  -3   -0.28    2.07
  -1 -13   2    4.78    2.12
  -1 -13   2   -0.59    1.98
  -1 -13   2   -0.63    1.39
  -1 -13   2    2.65    2.54
   1  13  -2    1.19    1.51
   1  13  -2    2.60    2.48
   1  13  -2   -1.46    1.98
   1  13  -2    2.74    1.84
  -1 -13   1    5.98    2.12
  -1 -13   1   -0.43    2.57
  -1 -13   1    3.74    2.02
  -1 -13   1    0.44    1.46
   1  13  -1   -1.76    1.98
   1  13  -1    0.36    1.45
   1  13  -1    4.17    1.83
   1  13  -1   -0.97    2.45
  -1 -13   0    0.22    2.16
  -1 -13   0   -0.18    2.07
  -1 -13   0   -1.35    1.46
  -1 -13   0    0.28    2.55
   1  13   0    0.64    1.73
   1  13   0    0.97    1.44
   1  13   0    1.45    2.38
   1  13   0   -0.58    1.99
  -1 -13  -1    2.96    2.06
  -1 -13  -1    1.00    2.66
  -1 -13  -1    3.73    1.50
   1  13   1    4.31    1.49
   1  13   1    1.65    2.47
   1  13   1    1.15    2.10
   1  13   1    1.70    1.73
  -1 -13  -2    3.34    2.06
  -1 -13  -2    0.83    2.62
  -1 -13  -2    1.16    1.49
   1  13   2    1.18    2.41
   1  13   2    1.27    1.68
   1  13   2    1.75    1.48
   1  13   2    1.26    2.14
  -1 -13  -3    5.20    2.65
  -1 -13  -3    0.48    1.57
   1  13   3    0.44    1.63
   1  13   3   -0.46    2.44
   1  13   3   -1.82    1.35
   1  13   3   -2.77    2.10
  -1 -13  -4   -2.08    2.75
  -1 -13  -4    0.46    1.73
   1  13   4   -1.05    2.54
   1  13   4   -0.93    1.81
  -1 -13  -5   -0.58    2.73
  -1 -13  -5    0.43    1.77
   1  13   5    3.78    2.84
   1  13   5    4.31    1.83
  -1 -13  -6    0.42    1.79
  -1 -13  -6    1.22    3.13
   1  13   6   -2.53    1.85
   1  13   6   -3.11    2.95
  -1 -13  -7    8.27    1.95
  -1 -13  -7   11.75    3.48
   1  13   7    8.38    3.31
   1  13   7    5.52    3.49
  -1 -13  -8    1.32    2.05
  -1 -13  -8    6.43    3.42
   1  13   8    3.07    2.37
  -1 -13  -9   -3.94    2.23
   1  13   9   -0.71    2.21
   1  12 -11    7.62    3.33
   1  12 -10    1.27    2.99
   1  12  -9    9.27    4.00
   1  12  -8    2.32    2.49
  -1 -12   7    2.75    2.82
   1  12  -7    5.20    2.30
   1  12  -7    5.62    2.32
   1  12  -7    7.62    2.86
  -1 -12   6    9.03    2.82
   1  12  -6   14.16    2.22
   1  12  -6   11.47    2.92
   1  12  -6   14.62    2.35
   1  12  -6   11.16    1.72
  -1 -12   5    0.73    2.46
   1  12  -5   -0.12    1.51
   1  12  -5    2.97    2.74
   1  12  -5   -0.04    1.92
   1  12  -5    0.96    2.15
  -1 -12   4    0.11    2.39
   1  12  -4   -0.29    1.95
   1  12  -4    3.42    1.46
   1  12  -4    4.75    2.57
   1  12  -4    2.49    1.82
  -1 -12   3    4.49    2.32
   1  12  -3    9.77    2.46
   1  12  -3    7.27    1.80
   1  12  -3    5.41    1.97
   1  12  -3    5.91    1.44
  -1 -12   2    3.76    2.28
  -1 -12   2    1.81    1.75
  -1 -12   2    0.41    1.25
   1  12  -2    0.30    1.37
   1  12  -2   -1.61    1.82
   1  12  -2    0.61    1.62
   1  12  -2    0.37    2.30
  -1 -12   1    2.01    2.27
  -1 -12   1    3.23    1.78
  -1 -12   1    1.62    1.36
  -1 -12   1    6.44    1.86
   1  12  -1    0.17    1.34
   1  12  -1    2.23    1.58
   1  12  -1    3.39    2.15
   1  12  -1    2.75    1.88
  -1 -12   0   22.62    2.53
  -1 -12   0   19.17    1.97
  -1 -12   0   18.04    1.62
   1  12   0   16.92    2.33
   1  12   0   20.21    1.75
   1  12   0   19.46    1.63
   1  12   0   16.40    2.11
  -1 -12  -1    1.78    2.24
  -1 -12  -1    1.58    1.74
  -1 -12  -1    1.13    1.33
   1  12   1    0.06    1.93
   1  12   1   -1.30    1.31
   1  12   1   -0.80    2.09
   1  12   1    1.08    1.47
  -1 -12  -2    3.10    1.49
  -1 -12  -2    2.31    2.31
   1  12   2    0.97    1.88
   1  12   2    4.41    2.11
   1  12   2    1.94    1.50
   1  12   2    2.54    1.35
  -1 -12  -3    5.42    1.55
  -1 -12  -3    9.36    2.40
   1  12   3    5.09    2.01
   1  12   3    3.26    2.23
   1  12   3    3.59    1.34
  -1 -12  -4   -0.43    1.77
  -1 -12  -4    0.21    1.48
  -1 -12  -4    0.66    2.37
   1  12   4   -2.41    2.27
   1  12   4   -0.51    1.73
  -1 -12  -5    1.19    1.95
  -1 -12  -5    1.40    2.00
  -1 -12  -5    0.30    2.61
  -1 -12  -5    3.69    1.63
   1  12   5    6.11    1.75
   1  12   5   -1.17    2.40
  -1 -12  -6    1.44    2.09
  -1 -12  -6    6.61    1.73
  -1 -12  -6    5.49    2.18
  -1 -12  -6    9.05    2.89
   1  12   6    2.83    1.82
   1  12   6    3.53    2.63
  -1 -12  -7    2.69    2.20
  -1 -12  -7    2.80    2.95
  -1 -12  -7    3.90    1.74
   1  12   7   -0.80    1.94
  -1 -12  -8    7.84    1.90
  -1 -12  -8    4.55    3.24
   1  12   8    2.40    2.29
  -1 -12  -9    2.46    1.99
   1  12   9    5.05    2.31
   1  12  10    0.67    2.47
   1  11 -11   -4.10    3.00
   1  11 -10    6.14    2.92
   1  11  -9    4.32    2.54
   1  11  -9    5.50    3.07
  -1 -11   8   23.18    3.11
   1  11  -8   25.34    3.21
   1  11  -8   25.35    2.74
  -1 -11   7   -2.44    2.67
   1  11  -7   -0.84    1.53
   1  11  -7    2.03    2.68
   1  11  -7   -1.44    2.15
  -1 -11   6    1.02    2.45
   1  11  -6    0.24    1.49
   1  11  -6    0.75    1.92
   1  11  -6    0.80    2.40
   1  11  -6    0.81    1.81
  -1 -11   5    5.39    2.30
   1  11  -5    5.30    2.38
   1  11  -5    4.58    1.73
   1  11  -5    1.84    1.37
   1  11  -5    1.88    1.94
  -1 -11   4   14.75    2.33
   1  11  -4   16.49    2.41
   1  11  -4   15.91    2.09
   1  11  -4   18.25    1.80
   1  11  -4   16.22    1.54
  -1 -11   3   -1.33    1.97
   1  11  -3   -0.25    2.10
   1  11  -3    1.26    1.50
   1  11  -3   -0.75    1.28
   1  11  -3   -0.53    1.74
  -1 -11   2   43.53    2.38
  -1 -11   2   51.75    2.78
  -1 -11   2   54.82    3.46
   1  11  -2   52.43    3.16
   1  11  -2   44.37    2.66
   1  11  -2   51.65    2.47
   1  11  -2   47.19    3.05
  -1 -11   1    0.04    1.64
  -1 -11   1    0.18    1.19
  -1 -11   1    1.20    1.55
  -1 -11   1   -1.63    1.98
   1  11  -1   -0.75    1.83
   1  11  -1    1.90    1.25
   1  11  -1    1.40    1.37
   1  11  -1   -0.26    1.65
  -1 -11   0   -2.20    2.00
  -1 -11   0   -1.14    1.16
  -1 -11   0    2.49    1.51
   1  11   0    0.47    1.22
   1  11   0    3.07    1.36
   1  11   0    1.90    1.86
   1  11   0   -3.01    1.68
  -1 -11  -1   -0.36    1.20
  -1 -11  -1   -0.14    1.97
   1  11   1   -0.78    1.71
   1  11   1   -1.43    1.81
   1  11   1    0.61    1.22
   1  11   1   -1.23    1.30
  -1 -11  -2   53.33    2.67
  -1 -11  -2   64.69    3.59
   1  11   2   53.49    3.05
   1  11   2   52.18    2.63
   1  11   2   63.38    2.63
   1  11   2   58.84    3.24
  -1 -11  -3    1.62    1.28
  -1 -11  -3    2.77    1.55
  -1 -11  -3    1.69    2.05
   1  11   3    1.92    1.30
   1  11   3   -1.56    1.69
   1  11   3   -0.50    1.91
  -1 -11  -4   11.75    1.85
  -1 -11  -4    9.39    1.48
  -1 -11  -4   10.12    1.72
  -1 -11  -4   10.45    2.29
   1  11   4   11.18    2.13
   1  11   4    7.98    1.77
  -1 -11  -5    0.05    1.83
  -1 -11  -5   -0.10    1.73
  -1 -11  -5    0.48    2.35
  -1 -11  -5   -0.94    1.43
   1  11   5   -1.71    2.14
   1  11   5    2.21    1.64
  -1 -11  -6    4.53    1.98
  -1 -11  -6    4.57    1.87
  -1 -11  -6    4.79    2.44
  -1 -11  -6    4.08    1.53
   1  11   6    3.54    1.72
  -1 -11  -7    0.09    1.55
  -1 -11  -7   -0.01    1.98
   1  11   7    3.12    1.82
  -1 -11  -8   17.31    2.93
   1  11   8    7.85    2.21
   1  11   9    0.49    2.28
   1  11  10    7.20    2.34
   1  11  11    2.43    2.47
   1  10 -12   -2.02    3.17
   1  10 -11    1.50    2.86
  -1 -10  10    3.11    4.18
   1  10 -10   -1.09    2.55
  -1 -10   9    9.03    3.04
   1  10  -9    4.61    2.45
  -1 -10   8    2.01    2.72
   1  10  -8    0.52    2.14
  -1 -10   7    9.42    2.52
   1  10  -7   11.53    2.50
   1  10  -7    8.03    2.04
  -1 -10   6   -3.38    2.17
   1  10  -6    0.33    1.61
   1  10  -6    0.34    1.86
   1  10  -6    2.71    2.18
  -1 -10   5    7.04    2.02
   1  10  -5    9.05    1.60
   1  10  -5    7.28    1.72
   1  10  -5   10.73    2.19
   1  10  -5    8.21    1.40
  -1 -10   4   -0.49    1.89
   1  10  -4    1.49    1.23
   1  10  -4    0.20    1.91
   1  10  -4    1.48    1.42
   1  10  -4    0.75    1.68
  -1 -10   3   18.75    2.06
   1  10  -3   19.32    2.09
   1  10  -3   17.94    1.85
   1  10  -3   22.67    1.88
   1  10  -3   20.30    1.61
  -1 -10   2    1.63    1.76
  -1 -10   2   -0.29    1.03
  -1 -10   2    0.60    1.32
   1  10  -2    0.36    1.54
   1  10  -2    0.02    1.14
   1  10  -2    0.97    1.26
   1  10  -2    1.41    1.78
  -1 -10   1    5.15    1.15
  -1 -10   1    8.45    1.81
  -1 -10   1    6.28    1.43
   1  10  -1    7.58    1.78
   1  10  -1    7.46    1.22
   1  10  -1    4.95    1.62
   1  10  -1    6.79    1.31
  -1 -10   0    0.07    1.32
  -1 -10   0   -0.40    1.70
  -1 -10   0   -0.95    1.08
   1  10   0    1.61    1.53
   1  10   0    0.28    1.16
   1  10   0    0.23    1.59
   1  10   0   -0.14    1.10
  -1 -10  -1   10.45    1.84
  -1 -10  -1    6.34    1.18
   1  10   1    6.90    1.66
   1  10   1    8.92    1.64
   1  10   1    7.75    1.20
   1  10   1    9.32    1.26
  -1 -10  -2    0.70    1.77
  -1 -10  -2    0.12    1.32
  -1 -10  -2   -0.95    1.15
   1  10   2    1.69    1.14
   1  10   2   -1.26    1.50
   1  10   2   -0.04    1.63
   1  10   2   -0.40    1.12
  -1 -10  -3    8.03    1.66
  -1 -10  -3    9.92    1.98
  -1 -10  -3   11.61    1.49
  -1 -10  -3   11.48    1.32
   1  10   3   11.13    1.84
   1  10   3    7.97    1.59
  -1 -10  -4    5.12    1.46
  -1 -10  -4    3.87    1.26
  -1 -10  -4    8.26    2.05
  -1 -10  -4    2.56    1.66
   1  10   4    3.96    1.83
   1  10   4    2.06    1.55
  -1 -10  -5    0.06    1.65
  -1 -10  -5    4.09    2.08
  -1 -10  -5    2.99    1.58
  -1 -10  -5    3.24    1.34
   1  10   5   -0.52    1.98
   1  10   5    2.79    1.51
  -1 -10  -6   -0.49    1.34
  -1 -10  -6   -2.33    1.57
  -1 -10  -6   -0.55    2.17
   1  10   6    3.04    1.70
  -1 -10  -7    0.08    2.28
  -1 -10  -7   -0.83    1.41
   1  10   7    0.83    1.67
   1  10   8    1.74    1.94
   1  10   9    3.22    2.01
   1  10  10    5.35    3.84
   1  10  11    6.06    2.41
   1  10  12    2.51    2.72
   1   9 -13    4.95    3.46
   1   9 -12   10.12    3.08
   1   9 -11    0.40    2.65
   1   9 -10   12.07    2.51
  -1  -9   9    6.16    2.81
   1   9  -9    4.68    2.29
  -1  -9   8   19.45    2.58
   1   9  -8   23.05    2.36
  -1  -9   7   28.98    2.56
   1   9  -7   27.70    2.99
  -1  -9   6    7.88    2.05
   1   9  -6    7.44    1.83
  -1  -9   5   41.36    2.98
   1   9  -5   35.12    2.79
   1   9  -5   36.78    2.29
   1   9  -5   40.83    2.80
   1   9  -5   37.59    2.13
  -1  -9   4   26.82    2.76
   1   9  -4   29.73    1.99
   1   9  -4   32.44    2.13
   1   9  -4   28.86    2.52
   1   9  -4   32.21    2.54
  -1  -9   3    5.48    1.63
   1   9  -3    4.62    1.22
   1   9  -3    5.11    1.16
   1   9  -3    8.56    1.60
   1   9  -3    5.50    1.64
  -1  -9   2   84.17    3.50
  -1  -9   2   83.24    3.09
  -1  -9   2   81.38    2.84
   1   9  -2   83.99    2.95
   1   9  -2   84.61    3.37
   1   9  -2   85.94    3.32
   1   9  -2   86.32    3.02
  -1  -9   1   76.08    2.87
  -1  -9   1   72.00    3.29
  -1  -9   1   72.90    2.65
   1   9  -1   77.51    3.08
   1   9  -1   72.61    3.15
   1   9  -1   72.75    2.73
   1   9  -1   80.16    2.78
  -1  -9   0   29.84    2.49
  -1  -9   0   23.90    1.68
   1   9   0   26.04    1.81
   1   9   0   21.99    2.12
   1   9   0   22.80    1.75
   1   9   0   20.26    2.33
  -1  -9  -1   47.30    2.17
  -1  -9  -1   50.82    2.85
   1   9   1   46.64    2.65
   1   9   1   50.46    2.19
   1   9   1   47.78    2.53
   1   9   1   47.83    2.17
  -1  -9  -2   29.61    2.13
  -1  -9  -2   35.14    2.69
  -1  -9  -2   34.32    1.95
  -1  -9  -2   34.59    2.06
   1   9   2   32.99    1.88
   1   9   2   35.29    2.41
   1   9   2   32.52    1.88
   1   9   2   32.84    2.27
  -1  -9  -3    9.90    1.82
  -1  -9  -3    9.22    1.17
  -1  -9  -3    6.35    1.49
  -1  -9  -3    8.23    1.31
   1   9   3    7.64    1.44
   1   9   3    7.69    1.44
   1   9   3    9.53    1.63
  -1  -9  -4   34.68    2.02
  -1  -9  -4   40.05    2.83
  -1  -9  -4   34.85    2.31
  -1  -9  -4   34.66    2.25
   1   9   4   34.85    2.41
   1   9   4   34.04    2.46
  -1  -9  -5   10.25    1.44
  -1  -9  -5   10.30    1.92
   1   9   5    8.89    1.53
  -1  -9  -6   27.75    2.33
   1   9   6   30.89    2.50
  -1  -9  -7   23.81    2.35
   1   9   7   13.62    1.86
   1   9   8   10.97    1.91
   1   9   9    6.29    2.02
   1   9  10    3.56    2.06
   1   9  11    3.80    2.65
   1   9  12    8.60    2.76
   1   8 -13   -0.13    3.22
   1   8 -12   12.84    2.91
   1   8 -12    9.42    3.01
   1   8 -11    1.18    2.54
   1   8 -11   -1.68    2.57
   1   8 -10   -0.73    2.26
  -1  -8   9   -2.41    2.48
   1   8  -9   -0.66    2.05
  -1  -8   8   26.15    2.48
   1   8  -8   24.51    2.24
  -1  -8   7    1.00    1.98
   1   8  -7    4.17    1.78
  -1  -8   6   29.82    2.87
   1   8  -6   30.88    2.60
  -1  -8   5    3.45    1.59
   1   8  -5    1.62    1.47
  -1  -8   4    0.63    1.49
   1   8  -4    1.28    1.44
   1   8  -4    0.00    1.10
  -1  -8   3    7.37    1.51
   1   8  -3    7.91    1.55
   1   8  -3    4.86    1.11
   1   8  -3    4.38    1.37
   1   8  -3    4.49    1.06
  -1  -8   2    3.33    0.91
  -1  -8   2    3.96    1.51
  -1  -8   2    4.07    1.11
   1   8  -2    3.60    1.46
   1   8  -2    4.29    1.44
   1   8  -2    4.14    1.06
   1   8  -2    3.38    1.01
  -1  -8   1   -0.99    0.93
  -1  -8   1   -1.28    1.09
  -1  -8   1    0.78    2.35
   1   8  -1   -0.49    1.07
   1   8  -1   -1.00    2.30
   1   8  -1    0.19    1.00
   1   8  -1   -1.11    1.29
  -1  -8   0   19.84    1.57
   1   8   0   21.27    2.48
   1   8   0   18.58    1.64
   1   8   0   20.71    2.13
  -1  -8  -1    2.19    1.67
  -1  -8  -1    2.01    1.13
  -1  -8  -1    2.43    0.97
   1   8   1    1.33    1.37
   1   8   1    3.66    1.02
   1   8   1    2.85    1.44
   1   8   1    3.61    1.03
  -1  -8  -2   12.36    1.25
  -1  -8  -2   12.34    1.47
  -1  -8  -2   11.96    1.14
  -1  -8  -2   12.37    2.75
   1   8   2   12.31    1.44
   1   8   2   14.06    1.53
   1   8   2   14.67    1.13
   1   8   2   16.43    1.53
  -1  -8  -3   -0.52    1.33
  -1  -8  -3    2.97    1.13
  -1  -8  -3    2.30    1.00
   1   8   3   -0.06    1.42
   1   8   3   -0.10    1.27
  -1  -8  -4   -0.17    1.36
  -1  -8  -4    1.55    1.14
  -1  -8  -4    0.89    1.04
  -1  -8  -4   -0.52    1.58
   1   8   4    0.51    1.29
  -1  -8  -5    0.26    1.64
  -1  -8  -5    0.37    1.39
  -1  -8  -5    0.74    1.10
   1   8   5    0.34    1.31
  -1  -8  -6   36.04    2.93
   1   8   6   39.69    2.54
   1   8   7    0.41    1.62
   1   8   8   10.05    1.80
   1   8   9    4.77    1.81
   1   8  10    2.85    1.98
   1   8  11    2.16    2.29
   1   8  12    9.12    2.62
   1   8  13    0.64    3.02
   1   7 -13   18.64    3.22
   1   7 -12    2.11    2.67
   1   7 -12    9.54    2.72
   1   7 -11    2.64    2.39
   1   7 -11    2.25    2.39
   1   7 -10    9.17    2.24
   1   7  -9    6.48    2.02
  -1  -7   8   10.61    2.10
   1   7  -8   11.87    1.92
  -1  -7   7   58.40    3.30
   1   7  -7   61.56    3.11
  -1  -7   6    5.11    1.66
   1   7  -6    5.93    1.55
  -1  -7   5   16.95    1.68
   1   7  -5   17.33    1.63
  -1  -7   4   19.46    1.81
   1   7  -4   18.79    2.16
  -1  -7   3   -0.06    1.37
   1   7  -3    0.94    1.25
   1   7  -3    1.30    0.96
   1   7  -3    0.64    0.94
  -1  -7   2   26.81    2.26
  -1  -7   2   29.19    1.78
  -1  -7   2   28.51    1.53
   1   7  -2   29.07    1.69
   1   7  -2   29.41    2.02
   1   7  -2   32.34    1.68
   1   7  -2   26.48    2.23
  -1  -7   1   94.82    3.09
  -1  -7   1   96.66    3.41
  -1  -7   1   91.08    2.96
   1   7  -1   89.20    3.34
   1   7  -1   95.65    3.25
   1   7  -1   94.26    3.02
   1   7  -1   98.56    3.04
  -1  -7   0   27.62    2.21
  -1  -7   0   25.22    1.58
   1   7   0   23.98    1.63
   1   7   0   23.64    2.11
   1   7   0   27.16    1.62
   1   7   0   26.92    1.94
  -1  -7  -1  190.18    5.61
  -1  -7  -1  205.94    5.92
  -1  -7  -1  199.46    5.65
   1   7   1  202.50    5.77
   1   7   1  192.04    5.61
   1   7   1  203.93    5.88
   1   7   1  201.67    5.61
  -1  -7  -2   32.74    1.75
  -1  -7  -2   32.94    1.86
  -1  -7  -2   31.12    1.96
  -1  -7  -2   33.43    2.34
   1   7   2   34.70    1.73
   1   7   2   31.79    2.20
   1   7   2   35.61    2.00
   1   7   2   36.06    1.68
  -1  -7  -3   16.84    1.50
  -1  -7  -3   17.59    1.60
  -1  -7  -3   18.61    1.65
  -1  -7  -3   14.30    1.40
   1   7   3   18.92    1.84
   1   7   3   16.27    1.43
  -1  -7  -4   39.03    1.97
  -1  -7  -4   37.55    2.54
  -1  -7  -4   38.10    2.07
  -1  -7  -4   37.50    1.84
   1   7   4   38.39    2.18
  -1  -7  -5   20.56    2.05
   1   7   5   23.82    2.03
  -1  -7  -6   11.73    1.74
   1   7   6   10.72    1.53
  -1  -7  -7   71.71    3.41
   1   7   7   63.33    3.06
   1   7   8    5.67    1.64
   1   7   9    5.54    1.76
   1   7  10   -0.09    1.84
   1   7  11    1.94    2.21
   1   7  13    7.40    2.80
   1   6 -14   14.46    3.17
   1   6 -13   -0.32    2.73
   1   6 -12   22.16    2.98
   1   6 -12   21.70    2.84
   1   6 -11   10.89    2.45
   1   6 -11   11.96    2.39
   1   6 -10   -2.37    2.01
   1   6 -10    2.73    1.98
   1   6  -9   13.53    2.01
  -1  -6   8   13.88    2.05
   1   6  -8   13.65    1.79
  -1  -6   7    0.83    1.58
   1   6  -7    0.98    1.48
  -1  -6   6   53.80    2.82
   1   6  -6   48.77    2.68
  -1  -6   5    9.13    1.51
   1   6  -5    8.26    1.44
  -1  -6   4   20.00    2.11
   1   6  -4   19.28    2.06
  -1  -6   3  157.68    4.75
   1   6  -3  151.27    4.72
  -1  -6   2   28.93    2.09
  -1  -6   2   26.42    1.60
   1   6  -2   25.65    1.50
   1   6  -2   25.05    1.96
   1   6  -2   27.55    1.54
  -1  -6   1  111.78    3.63
  -1  -6   1  108.95    3.27
   1   6  -1  106.88    3.58
   1   6  -1  112.74    3.53
   1   6  -1  113.65    3.32
   1   6  -1  109.51    3.32
  -1  -6   0   20.12    1.37
  -1  -6   0   19.07    1.88
  -1  -6   0   22.72    1.52
   1   6   0   22.18    1.44
   1   6   0   18.72    1.85
   1   6   0   18.64    1.71
   1   6   0   20.12    1.42
  -1  -6  -1    7.06    1.33
  -1  -6  -1    5.45    0.88
  -1  -6  -1    7.08    0.96
  -1  -6  -1    3.83    1.07
   1   6   1    6.42    1.22
   1   6   1    6.40    1.23
   1   6   1    7.95    0.89
   1   6   1    6.74    0.89
  -1  -6  -2   12.49    1.06
  -1  -6  -2   12.87    1.39
  -1  -6  -2   10.97    0.95
  -1  -6  -2   11.21    1.17
   1   6   2   14.27    1.29
   1   6   2   10.39    1.24
   1   6   2   12.86    1.27
  -1  -6  -3   31.72    1.53
  -1  -6  -3   27.91    2.19
  -1  -6  -3   30.57    1.70
   1   6   3   31.33    1.96
  -1  -6  -4   -0.35    1.34
   1   6   4    0.74    1.15
  -1  -6  -5   63.31    2.83
   1   6   5   60.34    2.63
  -1  -6  -6   29.64    2.42
   1   6   6   27.48    2.10
  -1  -6  -7   14.03    1.65
   1   6   7   13.59    1.60
  -1  -6  -8   27.36    2.69
   1   6   8   27.55    2.43
  -1  -6  -9   -0.40    1.88
   1   6   9    0.00    1.58
  -1  -6 -10    1.77    2.20
   1   6  10   -0.69    1.81
  -1  -6 -11    5.07    2.44
   1   6  11   10.95    2.21
   1   6  12    9.41    2.48
  -1  -6 -13   -1.23    4.29
   1   6  13    2.89    2.66
   1   5 -13    5.01    2.51
   1   5 -12    3.53    2.47
   1   5 -12    5.12    2.41
   1   5 -11    0.42    2.08
   1   5 -11    1.30    2.11
   1   5 -10   -1.11    1.80
   1   5 -10    3.74    1.89
   1   5  -9   -0.11    1.69
   1   5  -9    1.38    1.59
   1   5  -8    6.31    1.58
  -1  -5   7   10.38    1.68
   1   5  -7    9.43    1.51
  -1  -5   6    0.79    1.41
   1   5  -6    1.58    1.31
  -1  -5   5    7.81    1.37
   1   5  -5    7.40    1.33
  -1  -5   4   41.51    2.26
   1   5  -4   42.08    2.18
  -1  -5   3   21.00    1.85
   1   5  -3   19.45    1.75
  -1  -5   2    6.69    1.19
   1   5  -2    5.64    1.04
   1   5  -2    6.29    0.82
   1   5  -2    5.52    0.83
  -1  -5   1   40.62    1.62
  -1  -5   1   41.92    2.08
   1   5  -1   41.41    2.03
   1   5  -1   41.15    1.70
   1   5  -1   45.40    1.68
   1   5  -1   43.30    1.90
  -1  -5   0   -0.10    0.74
  -1  -5   0   -0.41    1.11
  -1  -5   0    1.14    0.83
   1   5   0   -1.14    1.03
   1   5   0    0.02    0.73
   1   5   0   -0.89    1.02
   1   5   0    0.07    0.76
  -1  -5  -1    9.75    0.92
  -1  -5  -1    8.22    1.06
  -1  -5  -1    9.07    1.24
  -1  -5  -1   10.12    0.86
   1   5   1   11.25    1.18
   1   5   1   11.12    0.85
   1   5   1   10.38    0.87
   1   5   1    9.03    1.15
  -1  -5  -2    1.80    0.98
  -1  -5  -2    2.13    1.19
  -1  -5  -2    3.82    0.83
  -1  -5  -2    2.98    0.76
   1   5   2    0.04    1.04
   1   5   2    2.17    1.03
   1   5   2    3.00    0.98
  -1  -5  -3    8.91    1.30
   1   5   3    9.30    1.11
  -1  -5  -4    0.41    1.25
   1   5   4    0.14    1.10
  -1  -5  -5   10.79    1.69
   1   5   5    9.19    1.32
  -1  -5  -6    4.63    1.34
   1   5   6    1.56    1.26
  -1  -5  -7   24.60    2.25
   1   5   7   21.86    2.14
  -1  -5  -8    8.41    1.72
   1   5   8    7.84    1.52
  -1  -5  -9    2.20    1.89
   1   5   9    1.03    1.59
  -1  -5 -10    4.47    2.15
   1   5  10    4.42    1.78
  -1  -5 -11   -0.59    2.44
   1   5  11   -1.09    1.95
  -1  -5 -12    4.12    2.40
   1   5  12   -1.12    2.14
  -1  -5 -13    3.87    2.55
   1   5  13   -1.65    2.48
  -1  -5 -14    3.84    2.75
   1   5  14    1.78    2.80
   1   4 -13    1.04    2.54
   1   4 -12    4.12    2.25
   1   4 -11   42.25    3.47
   1   4 -11   43.76    3.26
   1   4 -10    2.47    1.90
   1   4 -10    3.86    1.75
   1   4  -9   99.07    3.71
   1   4  -8   14.81    1.54
   1   4  -8   13.87    1.65
   1   4  -7   19.62    2.15
  -1  -4   6   29.86    2.21
   1   4  -6   30.64    2.11
  -1  -4   5   83.83    3.09
   1   4  -5   84.74    2.99
  -1  -4   4   86.75    3.00
   1   4  -4   86.26    2.94
  -1  -4   3  370.04    9.93
   1   4  -3  359.83    9.91
  -1  -4   2   -0.54    1.01
   1   4  -2   -0.36    0.97
  -1  -4   1   83.53    2.75
   1   4  -1   87.05    2.49
   1   4  -1   73.87    2.90
  -1  -4   0    5.71    1.10
  -1  -4   0    5.95    0.78
   1   4   0    6.97    0.75
   1   4   0    6.06    1.00
  -1  -4  -1   86.45    2.86
  -1  -4  -1   81.56    2.71
  -1  -4  -1   86.26    2.59
   1   4   1   77.65    3.14
   1   4   1   85.98    2.67
   1   4   1   86.86    2.55
  -1  -4  -2   50.85    2.14
  -1  -4  -2   46.84    1.94
   1   4   2   47.20    1.97
  -1  -4  -3   77.57    2.75
   1   4   3   75.73    2.62
  -1  -4  -4    1.67    1.07
   1   4   4    0.83    1.01
  -1  -4  -5  188.21    5.49
   1   4   5  186.48    5.48
  -1  -4  -6   -0.54    1.25
   1   4   6    1.42    1.16
  -1  -4  -7    2.15    1.36
   1   4   7    3.48    1.28
  -1  -4  -8    6.21    1.54
   1   4   8    6.82    1.46
  -1  -4  -9   11.34    1.88
   1   4   9    9.49    1.70
  -1  -4 -10    5.97    1.96
   1   4  10    5.32    1.75
  -1  -4 -11   24.90    2.71
  -1  -4 -11   30.17    3.11
   1   4  11   30.41    2.94
  -1  -4 -12   -2.83    2.92
  -1  -4 -12    3.38    2.18
   1   4  12   -0.96    2.21
  -1  -4 -13    2.28    2.42
   1   4  13    2.54    4.10
   1   3 -13    9.36    2.70
   1   3 -12   -0.52    2.15
   1   3 -11    4.80    1.91
   1   3 -10   16.14    1.83
   1   3  -9   27.16    2.50
   1   3  -9   22.83    2.26
   1   3  -8   10.43    1.39
   1   3  -7   45.12    2.21
   1   3  -6    2.50    1.08
  -1  -3   5   63.56    2.53
   1   3  -5   64.30    2.41
  -1  -3   4   23.14    1.75
   1   3  -4   25.11    1.65
  -1  -3   3   33.68    1.78
  -1  -3   2   38.80    1.78
   1   3  -2   39.74    1.82
  -1  -3   1   60.27    1.91
  -1  -3   1   61.92    2.17
  -1  -3   1   62.42    1.94
   1   3  -1   59.56    1.96
   1   3  -1   61.16    2.23
   1   3  -1   62.63    1.92
  -1  -3   0    5.00    0.66
  -1  -3   0    3.58    0.90
  -1  -3   0    5.37    0.68
   1   3   0    4.22    0.62
   1   3   0    3.87    0.95
   1   3   0    4.33    0.80
   1   3   0    4.79    0.71
  -1  -3  -1   38.39    1.46
  -1  -3  -1   39.06    1.46
  -1  -3  -1   34.94    1.79
  -1  -3  -1   38.84    1.58
   1   3   1   40.90    1.40
   1   3   1   37.01    1.80
   1   3   1   38.25    1.48
   1   3   1   37.09    1.54
  -1  -3  -2    2.01    0.85
  -1  -3  -2   -0.12    0.94
  -1  -3  -3   49.12    1.98
   1   3   3   47.23    1.94
  -1  -3  -4   29.31    1.74
   1   3   4   28.08    1.71
  -1  -3  -5    2.99    1.12
   1   3   5    2.31    1.09
  -1  -3  -6    2.96    1.19
   1   3   6    3.10    1.16
  -1  -3  -7   25.81    2.13
   1   3   7   27.47    2.06
  -1  -3  -8   57.03    2.80
   1   3   8   55.29    2.71
  -1  -3  -9   21.08    1.97
   1   3   9   21.31    2.33
  -1  -3 -10   16.03    2.11
  -1  -3 -10   19.51    2.06
   1   3  10   16.54    1.91
  -1  -3 -11   -1.46    2.18
  -1  -3 -11    0.24    1.91
   1   3  11   -1.22    1.85
  -1  -3 -12   -1.99    2.40
  -1  -3 -12    0.88    2.01
   1   3  12    4.21    2.20
  -1  -3 -13    4.15    2.38
  -1  -3 -14    6.79    2.53
   1   2 -13    2.95    2.66
   1   2 -12    5.36    2.16
   1   2 -11    8.18    1.90
   1   2 -10    1.58    1.58
   1   2  -9   60.33    2.71
   1   2  -8    9.56    1.43
   1   2  -7    6.62    1.20
   1   2  -6    2.12    0.98
   1   2  -5  146.83    4.19
   1   2  -5  140.31    4.19
  -1  -2   4   96.77    3.06
  -1  -2   3   93.52    2.93
   1   2  -3   96.53    2.93
  -1  -2   2    1.53    0.77
   1   2  -2    1.39    0.80
  -1  -2   1  248.88    6.93
   1   2  -1  256.02    6.87
   1   2  -1  257.16    6.95
   1   2  -1  267.50    6.86
  -1  -2   0    4.18    0.51
  -1  -2   0    2.53    0.70
  -1  -2   0    3.20    0.52
   1   2   0    3.89    0.54
   1   2   0    3.67    0.48
   1   2   0    1.93    0.73
  -1  -2  -1   83.15    2.36
  -1  -2  -1   82.22    2.45
  -1  -2  -1   82.67    2.35
   1   2   1   80.12    2.46
   1   2   1   82.03    2.38
  -1  -2  -2   78.98    2.46
   1   2   2   78.37    2.50
  -1  -2  -3   15.72    1.37
   1   2   3   15.69    1.38
  -1  -2  -4   52.60    2.09
   1   2   4   51.32    2.03
  -1  -2  -5   87.29    2.98
   1   2   5   86.01    2.94
  -1  -2  -6   56.91    2.46
   1   2   6   56.40    2.38
  -1  -2  -7    6.72    1.35
   1   2   7    2.36    1.16
  -1  -2  -8    0.13    1.39
   1   2   8   -0.52    1.22
  -1  -2  -9    1.28    1.49
  -1  -2  -9    6.18    1.64
   1   2   9    2.20    1.49
  -1  -2 -10    2.46    1.66
  -1  -2 -10    7.02    1.87
   1   2  10    2.89    1.66
  -1  -2 -11   11.56    2.29
  -1  -2 -11   14.14    2.03
   1   2  11   14.29    1.96
  -1  -2 -12    7.84    2.52
  -1  -2 -12    6.98    2.11
  -1  -2 -13    3.76    2.19
  -1  -2 -14    6.78    2.57
   1   1 -13   50.82    4.07
   1   1 -12    3.04    2.08
   1   1 -11    3.99    1.85
   1   1 -10    1.04    1.52
   1   1  -9   25.51    2.10
   1   1  -7  271.93    7.60
   1   1  -6    4.91    1.02
   1   1  -5  409.52   11.04
   1   1  -4   14.68    1.23
   1   1  -3   30.51    1.31
  -1  -1   1  236.21    5.58
   1   1  -1  181.35    5.59
  -1  -1  -1 1000.00   26.06
   1   1   1  977.95   26.06
  -1  -1  -2    1.14    0.70
   1   1   2    0.41    0.72
  -1  -1  -3   64.73    2.22
  -1  -1  -4   20.73    1.54
   1   1   4   21.35    1.50
  -1  -1  -5    3.60    1.07
   1   1   5    4.09    1.01
  -1  -1  -6   -0.66    1.10
  -1  -1  -6    1.43    1.11
   1   1   6    2.10    1.07
  -1  -1  -7  205.04    6.01
  -1  -1  -7  204.47    5.94
   1   1   7  204.78    5.99
  -1  -1  -8    3.84    1.41
  -1  -1  -8    3.25    1.29
   1   1   8    3.55    1.28
  -1  -1  -9   42.99    2.54
  -1  -1  -9   48.22    2.79
   1   1   9   47.17    2.62
  -1  -1 -10    1.11    1.80
  -1  -1 -10   -1.89    1.57
  -1  -1 -11    0.41    1.74
  -1  -1 -11   -0.69    2.10
  -1  -1 -12   -0.96    1.93
  -1  -1 -12    0.56    2.47
  -1  -1 -13   25.32    2.51
  -1  -1 -14    0.57    2.32
   1   0 -13   -2.61    2.58
   1   0 -12   10.87    2.21
   1   0 -11   -1.44    1.76
   1   0 -10    1.60    1.57
   1   0  -9    0.07    1.31
  -1   0   7   -1.19    1.03
   1   0  -7    1.01    1.03
  -1   0   6  127.20    3.84
   1   0  -6  127.18    3.84
  -1   0   5   -0.95    0.87
   1   0  -5    1.22    0.82
  -1   0   4    2.41    0.86
   1   0  -4    5.11    0.78
  -1   0   3   -0.80    0.70
   1   0  -3    0.80    0.64
   1   0  -2  226.44    6.05
  -1   0  -1   -0.18    0.42
  -1   0  -1    0.10    0.44
   1   0   1   -0.07    0.41
   1   0   1   -0.35    0.45
  -1   0  -2   34.36    1.43
  -1   0  -2   35.40    1.40
   1   0   2   34.19    1.46
   1   0   2   34.92    1.40
  -1   0  -3   -0.47    0.79
  -1   0  -3    0.47    0.83
   1   0   3   -2.38    1.02
  -1   0  -4  144.24    4.28
  -1   0  -4  144.70    4.23
   1   0   4  145.35    4.22
  -1   0  -5   -0.23    0.89
  -1   0  -5    0.12    0.96
   1   0   5    0.16    0.97
  -1   0  -6   47.96    2.04
  -1   0  -6   49.34    2.25
  -1   0  -7    0.40    1.10
  -1   0  -7   -0.03    1.40
  -1   0  -8    0.65    1.29
  -1   0  -8    1.76    1.22
  -1   0  -9   -0.59    1.51
  -1   0  -9   -0.14    1.32
  -1   0 -10    1.03    1.52
  -1   0 -10    1.64    1.77
  -1   0 -11   -0.16    2.21
  -1   0 -11    1.94    1.70
  -1   0 -11    1.62    2.12
  -1   0 -12   17.56    2.11
  -1   0 -12   17.04    2.63
  -1   0 -12   20.78    2.68
  -1   0 -13   -2.05    2.05
  -1   0 -14   15.40    2.49
   1  -1 -14   -0.61    2.06
   1  -1 -13   59.29    3.32
   1  -1 -13   39.93    3.93
   1  -1 -12   -4.20    1.73
   1  -1 -12   -4.46    2.07
   1  -1 -11    1.40    1.60
   1  -1 -11    4.14    1.82
  -1   1  10    2.50    1.45
   1  -1 -10    0.83    1.53
  -1   1   9   26.69    2.15
   1  -1  -9   27.42    2.23
  -1   1   8    0.64    1.16
   1  -1  -8    0.36    1.26
  -1   1   7  262.37    7.44
   1  -1  -7  267.88    7.44
  -1   1   6    2.83    0.97
   1  -1  -6    5.12    1.00
  -1   1   5  386.86   10.47
   1  -1  -5  398.96   10.46
   1  -1  -5  375.83   10.42
   1  -1  -4   14.85    1.20
  -1   1   3   31.10    1.45
  -1   1   3   30.65    1.48
   1  -1  -3   32.89    1.34
   1  -1  -3   30.49    1.44
  -1   1   2   15.05    0.99
  -1   1   2   13.89    0.98
   1  -1  -2   13.76    1.03
   1  -1  -2   12.35    0.88
  -1   1   1  257.82    6.19
   1  -1  -1  204.07    6.17
  -1   1  -1  942.41   24.91
   1  -1   1  948.88   24.91
  -1   1  -2    4.08    0.67
   1  -1   2    1.90    0.67
  -1   1  -3   65.47    2.24
  -1   1  -3   67.04    2.17
   1  -1   3   64.44    2.16
  -1   1  -4   22.14    1.50
   1  -1   4   18.61    1.45
  -1   1  -5    3.91    1.03
  -1   1  -5    5.90    0.83
  -1   1  -6    2.05    1.15
  -1   1  -6    2.90    0.87
  -1   1  -7  204.32    6.16
  -1   1  -7  199.67    5.75
  -1   1  -8    4.99    1.18
  -1   1  -8    1.25    1.63
  -1   1  -8    2.97    1.33
  -1   1  -9   50.13    2.39
  -1   1  -9   46.96    2.75
  -1   1  -9   37.38    2.97
  -1   1 -10   -0.08    1.74
  -1   1 -10   -0.78    1.86
  -1   1 -10    3.52    1.43
  -1   1 -11    1.06    2.17
  -1   1 -11    2.42    1.65
  -1   1 -11   -3.46    2.10
  -1   1 -12    1.78    1.81
  -1   1 -12    2.86    2.49
  -1   1 -12    1.94    2.52
  -1   1 -13   30.22    2.48
  -1   1 -14    0.73    3.11
  -1   1 -14    2.35    2.32
   1  -2 -15    4.10    2.40
   1  -2 -14   -1.92    2.24
   1  -2 -13   -1.02    2.54
   1  -2 -13    1.15    2.01
   1  -2 -12    1.34    1.88
   1  -2 -12    1.71    2.17
  -1   2  11    5.17    1.83
   1  -2 -11    5.63    1.94
  -1   2  10    1.19    1.58
   1  -2 -10    1.51    1.58
  -1   2   9   57.06    2.66
   1  -2  -9   52.00    2.64
  -1   2   8    5.75    1.26
   1  -2  -8    5.21    1.27
  -1   2   7    7.85    1.21
   1  -2  -7    7.77    1.15
  -1   2   6    1.82    1.05
   1  -2  -6    1.20    0.96
  -1   2   5  136.57    4.05
   1  -2  -5  137.33    3.97
   1  -2  -5  137.83    4.03
  -1   2   4   96.78    3.02
  -1   2   4  101.53    3.06
   1  -2  -4   98.56    3.00
  -1   2   3   97.60    2.92
  -1   2   3   95.62    2.95
   1  -2  -3   93.46    2.89
   1  -2  -3  102.94    2.96
  -1   2   2    0.60    0.75
  -1   2   2   -0.18    0.76
   1  -2  -2    0.52    0.78
  -1   2   1  269.42    7.15
  -1   2   1  264.53    7.09
   1  -2  -1  265.59    7.10
   1  -2  -1  266.39    7.16
   1  -2  -1  265.19    7.10
  -1   2   0    3.30    0.65
  -1   2   0    4.61    0.66
  -1   2   0    2.15    0.62
  -1   2   0    3.17    0.54
  -1   2   0    3.78    0.48
   1  -2   0    2.88    0.52
   1  -2   0    4.04    0.69
   1  -2   0    2.50    0.60
   1  -2   0    3.08    0.61
   1  -2   0    3.52    0.51
  -1   2  -1   81.01    2.55
  -1   2  -1   81.85    2.33
  -1   2  -1   77.85    2.40
  -1   2  -1   83.71    2.39
   1  -2   1   79.72    2.39
   1  -2   1   78.73    2.50
   1  -2   1   82.94    2.42
  -1   2  -2   77.67    2.67
  -1   2  -2   81.80    2.42
   1  -2   2   81.35    2.42
   1  -2   2   77.23    2.66
  -1   2  -3   23.51    1.24
   1  -2   3   17.28    1.29
  -1   2  -4   51.45    2.24
   1  -2   4   52.50    1.94
  -1   2  -5   83.21    3.04
  -1   2  -5   88.24    2.93
  -1   2  -5   88.25    2.68
   1  -2   5   83.37    2.79
  -1   2  -6   57.99    2.42
  -1   2  -6   61.44    2.09
  -1   2  -6   55.20    2.67
  -1   2  -7    3.13    1.44
  -1   2  -7    3.59    1.29
  -1   2  -7    7.14    0.96
  -1   2  -8   -0.07    1.33
  -1   2  -8    0.36    1.52
  -1   2  -9    5.21    1.61
  -1   2  -9    3.48    1.77
  -1   2  -9    7.12    1.31
  -1   2 -10    3.92    2.02
  -1   2 -10    5.08    1.83
  -1   2 -11   10.57    2.29
  -1   2 -11   17.67    2.48
  -1   2 -11   23.30    2.44
  -1   2 -12    4.90    2.59
  -1   2 -12   -1.26    2.43
  -1   2 -13   -1.86    2.87
  -1   2 -14    8.79    3.29
   1  -3 -14    5.78    2.46
  -1   3  13   12.02    2.49
   1  -3 -13   11.90    2.68
   1  -3 -13   11.91    2.34
  -1   3  12    1.86    2.01
   1  -3 -12   -2.06    2.32
  -1   3  11    0.54    1.77
   1  -3 -11    0.81    1.89
  -1   3  10   13.46    1.76
   1  -3 -10    8.23    1.73
  -1   3   9   19.49    1.73
   1  -3  -9   20.89    1.76
  -1   3   8    8.88    1.35
   1  -3  -8    7.71    1.35
  -1   3   7   43.21    2.13
   1  -3  -7   39.61    2.18
  -1   3   6   -0.20    1.07
   1  -3  -6    0.32    1.04
  -1   3   5   62.79    2.39
  -1   3   5   63.38    2.40
   1  -3  -5   69.79    2.29
   1  -3  -5   65.95    2.39
  -1   3   4   25.43    1.56
  -1   3   4   27.26    1.59
   1  -3  -4   26.95    1.50
   1  -3  -4   25.86    1.50
  -1   3   3   36.88    1.65
  -1   3   3   31.66    1.81
  -1   3   2   39.67    1.67
   1  -3  -2   40.67    1.72
  -1   3   1   59.84    2.09
  -1   3   1   61.09    1.90
  -1   3   1   62.59    2.06
   1  -3  -1   59.07    1.93
   1  -3  -1   61.24    1.96
   1  -3  -1   60.40    2.11
  -1   3   0    5.42    0.88
  -1   3   0    6.48    0.84
  -1   3   0    5.22    0.64
  -1   3   0    4.56    0.70
   1  -3   0    3.79    0.79
   1  -3   0    4.78    0.68
   1  -3   0    4.44    0.67
   1  -3   0    5.15    0.96
   1  -3   0    4.75    0.81
  -1   3  -1   37.62    1.59
  -1   3  -1   35.80    1.60
  -1   3  -1   37.48    1.51
  -1   3  -1   38.55    1.79
  -1   3  -1   39.70    1.42
   1  -3   1   39.35    1.54
   1  -3   1   37.58    1.64
   1  -3   1   39.01    1.46
   1  -3   1   39.26    1.44
   1  -3   1   38.21    1.72
  -1   3  -2    0.92    0.87
  -1   3  -2    2.59    0.77
   1  -3   2    3.26    0.79
   1  -3   2    1.36    0.98
  -1   3  -3   53.35    1.81
  -1   3  -3   47.66    2.17
   1  -3   3   50.40    1.82
   1  -3   3   44.36    2.22
  -1   3  -4   28.80    1.88
  -1   3  -5    2.06    1.20
  -1   3  -6    4.04    1.39
  -1   3  -7   36.36    1.65
  -1   3  -7   25.96    2.44
  -1   3  -7   28.82    2.15
  -1   3  -8   58.31    2.75
  -1   3  -8   55.59    3.07
  -1   3  -9   31.57    2.07
  -1   3  -9   20.01    1.99
  -1   3  -9   23.26    2.12
  -1   3 -10   20.66    2.12
  -1   3 -10   18.63    2.30
  -1   3 -11    4.59    2.30
  -1   3 -11   -1.28    2.11
  -1   3 -12    4.38    2.66
  -1   3 -12   -0.46    2.56
  -1   3 -13    3.05    3.05
  -1   3 -14   -0.07    3.06
  -1   4  14    8.20    4.01
   1  -4 -14    3.13    2.54
  -1   4  13    1.80    2.37
  -1   4  12    5.69    2.06
   1  -4 -12    7.90    2.57
  -1   4  11   34.77    2.86
   1  -4 -11   32.80    3.28
  -1   4  10   -2.58    1.61
   1  -4 -10    0.59    1.75
  -1   4   9  100.17    3.62
   1  -4  -9   95.02    3.74
  -1   4   8    9.39    1.34
   1  -4  -8   11.40    1.51
  -1   4   7   18.94    1.86
   1  -4  -7   23.85    1.90
  -1   4   6   30.55    1.94
   1  -4  -6   33.26    1.92
   1  -4  -6   34.61    1.76
  -1   4   5   85.81    2.95
  -1   4   5   85.95    2.95
   1  -4  -5   88.26    2.85
  -1   4   4   90.19    2.94
  -1   4   4   88.39    2.93
   1  -4  -4   89.70    2.89
  -1   4   3  385.14   10.29
  -1   4   3  380.13   10.27
   1  -4  -3  375.11   10.27
  -1   4   2    1.84    1.00
   1  -4  -2    0.48    0.96
  -1   4   1   82.90    2.74
  -1   4   1   85.14    2.54
  -1   4   1   88.33    2.70
   1  -4  -1   83.66    2.70
   1  -4  -1   82.38    2.59
   1  -4  -1   81.48    2.96
  -1   4   0    5.67    0.76
  -1   4   0    4.87    1.23
  -1   4   0    6.83    1.01
   1  -4   0    6.57    0.98
   1  -4   0    4.98    0.79
   1  -4   0    5.47    0.90
  -1   4  -1   87.81    2.59
  -1   4  -1   83.35    2.67
  -1   4  -1   88.37    2.74
  -1   4  -1   79.40    2.93
   1  -4   1   87.38    2.68
   1  -4   1   84.02    2.83
   1  -4   1   84.91    2.60
  -1   4  -2   47.45    1.92
  -1   4  -2   45.86    1.85
  -1   4  -2   45.71    2.06
   1  -4   2   48.10    1.84
   1  -4   2   47.50    2.14
  -1   4  -3   72.13    2.75
  -1   4  -3   78.66    2.56
   1  -4   3   78.27    2.48
   1  -4   3   75.98    2.83
  -1   4  -4    3.68    0.86
  -1   4  -4    3.90    1.16
   1  -4   4    1.55    0.89
   1  -4   4    1.40    1.30
  -1   4  -5  186.20    5.56
  -1   4  -6    1.08    1.43
  -1   4  -7    6.37    1.58
  -1   4  -8    7.71    1.81
  -1   4  -8    6.94    1.55
  -1   4  -9   13.30    2.08
  -1   4  -9   15.27    1.90
  -1   4 -10    7.17    2.06
  -1   4 -10    8.95    2.22
  -1   4 -11   28.15    2.75
  -1   4 -11   40.71    3.67
  -1   4 -12    0.98    2.55
  -1   4 -12    1.77    2.42
  -1   4 -13    4.78    2.97
  -1   4 -14    5.61    3.37
  -1   5  14   -0.47    2.74
  -1   5  13    3.93    2.40
  -1   5  12   -1.69    2.04
   1  -5 -12    7.50    2.54
  -1   5  11   -0.91    1.81
   1  -5 -11    2.87    2.18
  -1   5  10   -1.97    1.59
   1  -5 -10    1.32    1.86
  -1   5   9    1.17    1.45
   1  -5  -9    4.35    1.62
  -1   5   8    4.14    1.39
   1  -5  -8    7.54    1.48
  -1   5   7    7.22    1.30
   1  -5  -7    8.20    1.33
  -1   5   6    0.30    1.16
  -1   5   6    2.98    1.27
  -1   5   5   10.17    1.32
  -1   5   5    8.17    1.19
   1  -5  -5    7.63    1.17
  -1   5   4   43.32    2.12
  -1   5   4   44.31    2.07
   1  -5  -4   42.61    1.97
  -1   5   3   21.89    1.67
   1  -5  -3   20.71    1.27
   1  -5  -3   20.05    1.56
  -1   5   2    5.26    1.06
  -1   5   2    5.73    0.78
  -1   5   2    6.51    1.16
   1  -5  -2    6.10    1.02
   1  -5  -2    5.49    1.01
   1  -5  -2    5.63    0.81
  -1   5   1   43.93    1.71
  -1   5   1   43.23    1.97
  -1   5   1   43.08    1.73
  -1   5   1   44.17    1.95
   1  -5  -1   42.47    1.80
   1  -5  -1   43.32    2.00
   1  -5  -1   43.14    1.93
   1  -5  -1   44.84    1.71
  -1   5   0    0.51    0.78
  -1   5   0    0.66    0.97
  -1   5   0    0.53    1.02
   1  -5   0    0.66    1.01
   1  -5   0    0.56    0.96
   1  -5   0   -0.50    0.93
   1  -5   0    0.07    0.74
   1  -5   0    0.71    0.83
  -1   5  -1    8.72    0.90
  -1   5  -1   11.67    0.92
  -1   5  -1   13.28    1.21
  -1   5  -1    9.24    1.11
   1  -5   1   10.03    0.94
   1  -5   1    8.61    1.18
   1  -5   1    9.07    0.81
   1  -5   1    8.49    1.09
   1  -5   1    9.92    1.03
  -1   5  -2    2.31    1.08
  -1   5  -2    0.09    0.88
  -1   5  -2    2.54    1.05
  -1   5  -2    1.72    0.81
  -1   5  -2    1.99    0.76
   1  -5   2    2.25    0.90
   1  -5   2    1.07    1.11
  -1   5  -3   11.62    1.26
  -1   5  -3    8.82    0.97
  -1   5  -3   11.47    1.27
   1  -5   3   12.46    1.34
  -1   5  -4    2.56    0.83
  -1   5  -4    1.86    1.27
   1  -5   4    3.17    1.34
  -1   5  -5    9.79    1.46
   1  -5   5   10.79    1.57
  -1   5  -6    2.41    1.41
  -1   5  -7   24.44    2.49
  -1   5  -8   11.87    1.81
  -1   5  -9    3.57    1.88
  -1   5  -9    3.29    1.85
  -1   5 -10   11.54    2.21
  -1   5 -10    2.42    2.10
  -1   5 -11   -5.72    2.33
  -1   5 -11    0.66    2.39
  -1   5 -12   -1.27    2.63
  -1   5 -12    0.00    2.67
  -1   5 -13    5.03    3.22
  -1   6  14   10.13    3.01
  -1   6  13    0.58    2.76
  -1   6  12   20.07    2.51
  -1   6  11    6.80    2.08
  -1   6  10    0.70    1.67
  -1   6   9    9.69    1.69
  -1   6   8   12.79    1.65
  -1   6   7   -0.43    1.35
  -1   6   6   51.41    2.45
  -1   6   6   51.80    2.47
   1  -6  -6   54.15    2.43
  -1   6   5    9.99    1.28
  -1   6   5    8.46    1.41
   1  -6  -5    6.43    1.31
  -1   6   4   20.73    1.84
  -1   6   4   17.99    1.82
   1  -6  -4   20.95    1.79
  -1   6   3  168.11    4.80
  -1   6   3  161.14    4.72
   1  -6  -3  157.76    4.57
   1  -6  -3  156.68    4.73
  -1   6   2   27.69    1.84
  -1   6   2   26.71    1.47
  -1   6   2   29.44    1.51
   1  -6  -2   25.52    1.92
   1  -6  -2   26.39    1.85
   1  -6  -2   27.38    1.49
  -1   6   1  107.13    3.50
  -1   6   1  110.11    3.50
  -1   6   1  109.81    3.33
  -1   6   1  111.88    3.31
   1  -6  -1  108.55    3.57
   1  -6  -1  109.86    3.30
   1  -6  -1  110.96    3.51
   1  -6  -1  114.74    3.38
  -1   6   0   22.06    1.70
  -1   6   0   19.13    1.66
  -1   6   0   24.54    1.45
  -1   6   0   19.95    1.45
   1  -6   0   21.15    1.52
   1  -6   0   21.20    1.40
   1  -6   0   22.81    1.86
   1  -6   0   22.06    1.70
   1  -6   0   19.33    1.65
  -1   6  -1    6.50    0.94
  -1   6  -1    6.78    1.23
  -1   6  -1    7.04    1.15
   1  -6   1    5.78    0.98
   1  -6   1    6.04    1.09
   1  -6   1    3.13    1.11
   1  -6   1    5.94    0.85
   1  -6   1    6.19    1.23
  -1   6  -2   12.47    1.33
  -1   6  -2   12.55    1.00
  -1   6  -2   15.15    1.43
  -1   6  -2   15.39    1.41
   1  -6   2   11.17    1.13
   1  -6   2   14.00    1.39
  -1   6  -3   28.67    1.64
  -1   6  -3   29.01    1.98
  -1   6  -3   29.05    1.62
  -1   6  -3   32.87    1.55
  -1   6  -3   28.83    2.15
   1  -6   3   29.97    2.24
  -1   6  -4   -1.45    1.27
  -1   6  -4    0.95    1.30
   1  -6   4   -0.36    1.43
  -1   6  -5   62.25    2.85
   1  -6   5   62.79    2.95
  -1   6  -6   32.54    2.57
   1  -6   6   33.42    2.79
  -1   6  -7   16.60    1.84
  -1   6  -8   34.95    3.08
  -1   6  -9    2.72    2.07
  -1   6 -10    2.47    2.33
  -1   6 -10   -0.02    2.12
  -1   6 -11   11.66    2.78
  -1   6 -11   11.34    2.71
  -1   6 -12   11.86    3.05
  -1   6 -13    8.67    3.15
  -1   7  13   15.45    2.90
  -1   7  12    9.64    2.42
  -1   7  11    2.61    1.96
  -1   7  10    3.74    1.80
  -1   7   9    3.61    1.75
  -1   7   8    7.37    1.57
  -1   7   7   63.68    2.88
  -1   7   7   59.62    2.99
   1  -7  -7   63.00    2.82
  -1   7   6    6.54    1.55
  -1   7   6    5.57    1.32
  -1   7   5   19.42    1.97
   1  -7  -5   18.16    1.99
  -1   7   4   20.72    1.90
  -1   7   4   19.87    1.98
   1  -7  -4   20.17    1.70
   1  -7  -4   19.44    1.87
  -1   7   3    1.87    1.34
   1  -7  -3    1.07    1.25
   1  -7  -3    0.47    1.31
   1  -7  -3   -0.13    0.91
  -1   7   2   28.44    1.99
  -1   7   2   32.43    2.00
  -1   7   2   29.49    1.67
  -1   7   2   29.47    1.62
   1  -7  -2   29.87    1.78
   1  -7  -2   28.26    1.66
   1  -7  -2   26.76    2.01
   1  -7  -2   29.75    2.11
  -1   7   1   89.57    3.23
  -1   7   1   95.75    3.19
  -1   7   1   97.05    2.98
  -1   7   1   92.00    3.00
   1  -7  -1   94.17    3.31
   1  -7  -1   91.18    3.24
   1  -7  -1   93.69    3.00
   1  -7  -1   94.24    3.07
  -1   7   0   30.39    1.65
  -1   7   0   27.12    1.93
  -1   7   0   26.87    2.07
  -1   7   0   26.12    1.67
   1  -7   0   29.16    1.60
   1  -7   0   29.72    2.10
   1  -7   0   27.29    1.73
   1  -7   0   28.28    1.91
   1  -7   0   22.45    1.94
  -1   7  -1  190.24    5.82
  -1   7  -1  199.92    5.78
  -1   7  -1  203.30    5.63
   1  -7   1  198.21    5.84
   1  -7   1  204.46    5.65
   1  -7   1  205.64    5.74
   1  -7   1  192.86    5.58
  -1   7  -2   36.54    1.83
  -1   7  -2   38.53    2.26
  -1   7  -2   36.01    2.14
  -1   7  -2   33.31    1.85
   1  -7   2   34.29    1.94
   1  -7   2   36.88    2.31
   1  -7   2   36.78    1.81
  -1   7  -3   17.75    1.60
  -1   7  -3   19.81    1.63
  -1   7  -3   18.16    1.61
  -1   7  -3   21.55    2.11
  -1   7  -3   13.53    1.43
   1  -7   3   19.07    1.68
  -1   7  -4   38.37    2.46
  -1   7  -4   36.50    2.79
   1  -7   4   39.75    2.55
  -1   7  -5   21.75    2.39
  -1   7  -5   25.41    2.12
   1  -7   5   22.10    2.52
  -1   7  -6   15.24    1.73
  -1   7  -6   13.24    1.76
   1  -7   6   12.98    1.89
  -1   7  -7   62.15    3.30
  -1   7  -8    9.24    1.97
  -1   7  -9    7.10    2.17
  -1   7 -10    2.36    2.27
  -1   7 -11    0.87    2.52
  -1   7 -11   -0.83    2.49
  -1   7 -12    3.39    2.82
  -1   8  13    7.33    2.83
  -1   8  12   12.40    2.92
  -1   8  11   -0.91    2.02
  -1   8  10   -1.15    1.82
  -1   8   9   -2.77    1.61
  -1   8   8   24.94    2.64
  -1   8   7    2.66    1.84
  -1   8   7    2.68    1.51
   1  -8  -7    3.03    1.67
  -1   8   6   31.65    2.53
  -1   8   6   25.41    2.25
   1  -8  -6   32.96    2.21
  -1   8   5    3.91    1.57
  -1   8   5    2.53    1.34
   1  -8  -5    3.16    1.45
   1  -8  -5    2.45    1.05
   1  -8  -5    3.89    1.21
  -1   8   4    3.27    1.59
   1  -8  -4    0.40    1.42
   1  -8  -4   -0.57    0.98
   1  -8  -4    1.02    1.43
  -1   8   3    5.70    1.47
  -1   8   3    5.26    1.29
   1  -8  -3    5.01    1.03
   1  -8  -3    7.46    1.43
   1  -8  -3    4.69    1.43
  -1   8   2    1.89    1.29
  -1   8   2    3.35    1.48
  -1   8   2    3.93    0.98
  -1   8   2    3.41    0.98
   1  -8  -2    6.00    1.12
   1  -8  -2    4.32    1.06
   1  -8  -2    4.06    1.42
   1  -8  -2    4.77    1.42
  -1   8   1   -0.52    2.25
  -1   8   1   -2.03    1.23
  -1   8   1    0.09    0.99
  -1   8   1    0.69    0.99
   1  -8  -1    0.48    1.37
   1  -8  -1   -1.45    1.29
   1  -8  -1   -0.54    0.95
   1  -8  -1   -1.30    1.29
  -1   8   0   20.61    1.66
  -1   8   0   22.69    2.14
  -1   8   0   17.18    2.52
   1  -8   0   19.53    2.16
   1  -8   0   20.60    1.91
   1  -8   0   21.91    1.94
   1  -8   0   18.22    1.56
   1  -8   0   18.74    1.51
  -1   8  -1    3.74    1.50
  -1   8  -1    3.71    1.26
  -1   8  -1    2.00    1.05
  -1   8  -1    3.04    1.07
   1  -8   1    1.49    0.94
   1  -8   1    2.00    1.23
   1  -8   1    2.90    1.10
  -1   8  -2   15.09    1.23
  -1   8  -2   14.77    1.49
  -1   8  -2   16.06    1.62
   1  -8   2   14.46    1.33
   1  -8   2   12.12    1.60
   1  -8   2   14.51    1.40
   1  -8   2   13.87    1.21
  -1   8  -3    1.92    1.12
  -1   8  -3    3.22    1.54
  -1   8  -3    2.24    1.32
  -1   8  -3    0.79    1.06
   1  -8   3    1.82    1.14
   1  -8   3    1.94    1.47
  -1   8  -4    0.86    1.57
  -1   8  -4    1.60    1.09
  -1   8  -4   -0.34    0.99
  -1   8  -4    1.02    1.45
   1  -8   4    1.58    1.59
  -1   8  -5    1.41    1.53
  -1   8  -5   -0.50    1.59
   1  -8   5   -0.62    1.75
  -1   8  -6   43.49    2.73
  -1   8  -6   39.14    2.91
   1  -8   6   39.64    3.18
  -1   8  -7    2.45    1.82
  -1   8  -7   -0.58    1.91
   1  -8   7   -0.08    2.20
  -1   8  -8   16.23    2.26
  -1   8  -8   12.53    2.22
  -1   8  -9    6.20    2.34
  -1   8 -10    3.18    2.41
  -1   8 -11   -0.88    2.64
  -1   8 -12   14.15    3.56
  -1   8 -13   -2.14    3.33
  -1   9  13    9.22    2.94
  -1   9  12    5.41    2.41
  -1   9  11    3.01    2.27
  -1   9  10    6.48    2.14
  -1   9   9    3.10    1.84
  -1   9   8   15.13    2.01
  -1   9   8   18.85    2.48
   1  -9  -8   18.37    2.02
  -1   9   7   28.75    2.55
  -1   9   7   30.39    2.99
   1  -9  -7   29.65    2.63
  -1   9   6    7.34    1.59
  -1   9   6    7.21    1.98
   1  -9  -6    9.24    1.79
  -1   9   5   37.92    2.45
  -1   9   5   34.82    2.62
   1  -9  -5   34.71    2.08
   1  -9  -5   35.62    2.51
  -1   9   4   29.76    2.34
  -1   9   4   28.12    2.44
   1  -9  -4   29.85    2.32
   1  -9  -4   26.99    3.00
   1  -9  -4   29.96    1.95
  -1   9   3    6.96    1.63
  -1   9   3    5.87    1.43
  -1   9   3    7.34    1.09
   1  -9  -3    7.12    1.55
   1  -9  -3    9.08    2.31
   1  -9  -3    5.68    1.17
   1  -9  -3    7.52    1.29
  -1   9   2   83.57    3.21
  -1   9   2   86.02    3.23
  -1   9   2   81.50    2.85
  -1   9   2   81.39    2.87
   1  -9  -2   82.80    3.01
   1  -9  -2   82.97    3.54
   1  -9  -2   78.93    2.92
  -1   9   1   68.43    2.93
  -1   9   1   67.62    2.98
  -1   9   1   72.15    2.65
  -1   9   1   73.78    2.66
   1  -9  -1   68.44    2.64
   1  -9  -1   72.03    2.97
   1  -9  -1   78.35    3.18
   1  -9  -1   75.76    2.79
  -1   9   0   23.02    2.08
  -1   9   0   23.99    1.83
  -1   9   0   21.91    1.77
  -1   9   0   22.23    2.26
   1  -9   0   24.41    1.72
   1  -9   0   27.31    2.43
   1  -9   0   24.63    1.95
   1  -9   0   20.32    2.01
  -1   9  -1   48.23    2.24
  -1   9  -1   50.97    2.26
  -1   9  -1   49.46    2.56
  -1   9  -1   46.87    2.61
   1  -9   1   49.50    2.37
   1  -9   1   54.42    2.52
   1  -9   1   46.32    2.13
   1  -9   1   53.57    2.75
  -1   9  -2   30.19    2.03
  -1   9  -2   34.60    2.05
  -1   9  -2   34.18    2.47
  -1   9  -2   36.59    2.35
   1  -9   2   30.68    2.62
   1  -9   2   28.74    1.78
   1  -9   2   38.15    2.15
   1  -9   2   29.17    2.22
  -1   9  -3    9.52    1.58
  -1   9  -3   10.49    1.71
  -1   9  -3   10.25    1.31
   1  -9   3    8.69    1.73
   1  -9   3    9.03    1.35
  -1   9  -4   36.17    2.32
  -1   9  -4   38.19    2.69
  -1   9  -4   36.97    2.68
   1  -9   4   35.64    2.22
   1  -9   4   39.65    2.94
  -1   9  -5    7.05    1.75
  -1   9  -5   11.52    1.98
  -1   9  -5   10.14    1.48
  -1   9  -5    9.12    1.29
   1  -9   5    9.09    2.03
  -1   9  -6   32.64    2.85
  -1   9  -6   29.65    2.87
   1  -9   6   26.81    2.47
  -1   9  -7   19.19    2.43
  -1   9  -7   20.72    2.24
   1  -9   7   21.07    2.65
  -1   9  -8   16.45    2.51
  -1   9  -8   10.63    2.29
  -1   9  -9    7.98    2.44
  -1   9  -9   11.70    2.62
  -1   9 -10    2.61    2.62
  -1   9 -11   -5.22    2.76
  -1   9 -12    9.90    3.27
  -1  10  12    3.11    2.58
  -1  10  11    3.03    2.54
  -1  10  10    0.91    2.07
  -1  10   9    2.71    2.12
  -1  10   8   -0.02    2.45
  -1  10   8   -0.30    1.78
   1 -10  -8   -0.54    2.00
  -1  10   7    4.31    1.77
  -1  10   7    3.71    2.39
   1 -10  -7    7.06    2.04
  -1  10   6    0.30    2.09
  -1  10   6    0.21    1.55
   1 -10  -6   -0.82    1.75
   1 -10  -6    1.92    1.38
  -1  10   5   10.16    2.02
  -1  10   5    8.59    1.68
   1 -10  -5    7.86    1.41
   1 -10  -5    6.83    1.82
  -1  10   4    0.74    1.49
  -1  10   4    0.36    1.82
   1 -10  -4    0.37    1.39
   1 -10  -4    2.82    1.27
   1 -10  -4    1.24    1.65
   1 -10  -4    2.10    1.75
  -1  10   3   16.40    1.39
  -1  10   3   21.99    2.40
  -1  10   3   16.51    1.72
   1 -10  -3   19.98    2.19
   1 -10  -3   22.76    2.17
   1 -10  -3   19.07    1.94
   1 -10  -3   19.18    1.89
  -1  10   2    0.84    1.50
  -1  10   2   -0.33    1.64
  -1  10   2    0.04    1.10
  -1  10   2   -0.47    1.11
   1 -10  -2    0.68    1.37
   1 -10  -2    1.35    1.17
   1 -10  -2    2.03    1.70
   1 -10  -2    0.19    1.51
  -1  10   1    6.06    1.48
  -1  10   1   10.38    1.70
  -1  10   1    7.65    1.24
  -1  10   1    7.01    1.17
   1 -10  -1    7.35    1.42
   1 -10  -1    7.35    1.66
   1 -10  -1    9.85    1.65
   1 -10  -1    6.38    1.76
   1 -10  -1    8.67    1.22
  -1  10   0   -2.07    1.16
  -1  10   0   -0.52    1.49
  -1  10   0   -0.42    1.61
  -1  10   0    0.65    1.15
   1 -10   0   -1.96    1.43
   1 -10   0    2.19    1.10
   1 -10   0    0.08    1.67
   1 -10   0    1.58    1.33
  -1  10  -1    6.38    1.28
  -1  10  -1    7.42    1.63
  -1  10  -1    6.94    1.32
  -1  10  -1    8.89    1.73
   1 -10   1    8.22    1.41
   1 -10   1    8.89    1.60
   1 -10   1    5.70    1.14
   1 -10   1    8.39    1.75
  -1  10  -2   -1.27    1.28
  -1  10  -2   -0.95    1.18
  -1  10  -2    0.42    1.41
  -1  10  -2    0.05    1.67
   1 -10   2    2.55    1.42
   1 -10   2   -1.67    1.72
   1 -10   2    1.04    1.07
  -1  10  -3   10.54    1.91
  -1  10  -3   12.06    1.75
  -1  10  -3   11.67    1.49
  -1  10  -3   12.09    1.39
   1 -10   3   10.82    1.93
   1 -10   3   11.00    1.87
  -1  10  -4    5.57    1.69
  -1  10  -4    4.57    1.51
  -1  10  -4    4.55    1.99
   1 -10   4    1.57    1.95
  -1  10  -5    6.85    1.81
  -1  10  -5    4.80    2.17
  -1  10  -5    3.28    1.57
   1 -10   5    3.60    2.15
  -1  10  -6    1.77    2.24
  -1  10  -6    3.05    1.94
   1 -10   6   -0.63    2.35
  -1  10  -7   -0.19    2.07
  -1  10  -7    4.16    2.49
   1 -10   7    3.45    2.61
  -1  10  -8    4.19    2.58
  -1  10  -8    0.01    2.27
   1 -10   8    2.16    3.00
  -1  10  -9    4.31    2.51
  -1  10  -9    7.67    2.99
  -1  10 -10    4.04    3.30
  -1  10 -10    0.77    2.75
  -1  10 -11    6.44    3.21
  -1  10 -12    6.40    3.35
  -1  11  11   -1.55    2.45
  -1  11  10    4.84    3.90
  -1  11   9   -1.12    2.10
  -1  11   8   20.85    3.04
  -1  11   8   17.32    2.23
   1 -11  -8   16.72    1.91
  -1  11   7   -1.07    1.72
  -1  11   7   -2.78    2.57
   1 -11  -7    1.98    2.12
   1 -11  -7    1.10    1.55
  -1  11   6   -2.03    1.61
  -1  11   6   -0.29    2.33
   1 -11  -6    2.70    1.94
   1 -11  -6    1.87    1.49
  -1  11   5    3.18    2.17
  -1  11   5    0.45    1.64
   1 -11  -5    2.39    1.70
   1 -11  -5   -0.44    1.88
   1 -11  -5    0.96    1.45
  -1  11   4   12.54    1.90
  -1  11   4   15.15    2.20
   1 -11  -4   12.77    1.96
   1 -11  -4   13.93    1.53
   1 -11  -4   18.98    2.21
   1 -11  -4   15.98    1.76
  -1  11   3   -0.85    1.69
  -1  11   3    1.60    1.92
  -1  11   3    0.50    1.24
   1 -11  -3   -1.56    1.57
   1 -11  -3   -1.35    1.67
   1 -11  -3   -1.13    1.24
   1 -11  -3   -0.66    1.96
  -1  11   2   43.82    2.44
  -1  11   2   41.53    2.93
  -1  11   2   52.97    2.45
  -1  11   2   48.91    2.97
   1 -11  -2   52.31    3.27
   1 -11  -2   49.50    2.76
   1 -11  -2   45.32    2.78
   1 -11  -2   43.58    2.44
  -1  11   1    1.03    1.31
  -1  11   1   -0.71    1.57
  -1  11   1    0.26    1.83
  -1  11   1    1.89    1.25
   1 -11  -1    1.67    1.17
   1 -11  -1    3.29    1.78
   1 -11  -1   -0.20    1.90
   1 -11  -1   -0.35    1.48
   1 -11  -1    0.13    1.54
  -1  11   0    1.09    1.63
  -1  11   0   -0.38    1.21
  -1  11   0    0.07    1.31
  -1  11   0    0.22    1.84
   1 -11   0   -0.87    1.20
   1 -11   0    0.66    1.48
   1 -11   0    0.14    1.69
   1 -11   0   -0.32    1.91
  -1  11  -1   -0.05    1.41
  -1  11  -1    1.26    1.79
  -1  11  -1   -0.05    1.25
  -1  11  -1    0.63    1.74
   1 -11   1   -1.64    1.16
   1 -11   1    1.00    1.52
   1 -11   1   -0.58    1.67
   1 -11   1   -0.36    1.87
  -1  11  -2   57.62    2.83
  -1  11  -2   60.83    2.69
  -1  11  -2   57.43    3.22
  -1  11  -2   60.15    3.30
   1 -11   2   55.24    3.51
   1 -11   2   51.95    2.86
   1 -11   2   49.77    2.48
   1 -11   2   65.86    2.96
  -1  11  -3    1.84    1.54
  -1  11  -3    2.20    1.38
  -1  11  -3    1.72    1.69
  -1  11  -3    4.69    1.99
   1 -11   3    0.99    1.57
   1 -11   3    3.70    2.00
  -1  11  -4   15.95    2.31
  -1  11  -4   12.38    1.57
  -1  11  -4   12.63    1.75
  -1  11  -4   13.44    2.04
   1 -11   4   12.21    2.35
  -1  11  -5    1.26    1.93
  -1  11  -5   -1.11    2.32
  -1  11  -5    0.23    1.74
   1 -11   5   -0.55    2.36
  -1  11  -6    5.01    2.59
  -1  11  -6    5.45    1.92
  -1  11  -6    6.35    2.15
   1 -11   6    2.75    2.64
  -1  11  -7    0.10    2.75
  -1  11  -7    2.16    2.22
  -1  11  -7    0.81    1.99
   1 -11   7   -1.15    2.76
  -1  11  -8   11.86    2.58
  -1  11  -8   17.54    3.23
   1 -11   8   16.13    5.26
  -1  11  -9    5.49    3.16
  -1  11  -9    4.42    2.65
  -1  11 -10    5.15    3.07
  -1  11 -11    1.19    3.23
  -1  12  11    5.85    2.81
  -1  12  10   -2.45    2.37
  -1  12   9    3.94    3.31
   1 -12  -9    5.84    2.57
  -1  12   8    2.46    2.10
  -1  12   8    0.65    3.16
   1 -12  -8    4.57    2.34
   1 -12  -8    0.49    1.76
  -1  12   7    2.31    1.90
  -1  12   7    2.14    2.93
   1 -12  -7    2.76    1.68
   1 -12  -7    4.19    2.27
  -1  12   6    8.89    1.98
  -1  12   6    6.07    2.62
   1 -12  -6   10.45    1.76
   1 -12  -6   11.30    2.13
   1 -12  -6    8.43    2.27
  -1  12   5    2.10    2.48
  -1  12   5    2.95    1.71
   1 -12  -5    0.16    2.32
   1 -12  -5    1.22    1.53
   1 -12  -5    0.44    2.10
   1 -12  -5    1.00    1.90
  -1  12   4    4.83    1.92
  -1  12   4   -1.23    2.33
   1 -12  -4    3.44    2.27
   1 -12  -4    0.35    1.86
   1 -12  -4    0.83    1.95
   1 -12  -4   -1.14    1.46
  -1  12   3    5.31    1.39
  -1  12   3    4.63    1.45
  -1  12   3    6.51    2.24
  -1  12   3    4.33    1.89
   1 -12  -3    6.36    2.27
   1 -12  -3    5.10    1.95
   1 -12  -3    6.91    1.88
   1 -12  -3    7.96    1.55
  -1  12   2    1.14    1.36
  -1  12   2    1.92    1.44
  -1  12   2   -0.19    2.07
  -1  12   2    1.07    1.89
   1 -12  -2    1.23    2.18
   1 -12  -2    1.48    1.39
   1 -12  -2    0.09    1.77
   1 -12  -2   -0.49    1.79
  -1  12   1    1.24    1.32
  -1  12   1    2.49    1.85
  -1  12   1    0.81    2.09
  -1  12   1    3.63    1.50
   1 -12  -1    2.98    1.77
   1 -12  -1    0.94    1.37
   1 -12  -1    3.36    1.96
   1 -12  -1    4.00    2.15
  -1  12   0   22.47    2.16
  -1  12   0   20.67    2.32
  -1  12   0   18.26    1.76
  -1  12   0   17.09    2.09
   1 -12   0   14.58    1.56
   1 -12   0   21.37    2.19
   1 -12   0   17.07    2.32
   1 -12   0   26.25    2.63
  -1  12  -1   -3.49    1.99
  -1  12  -1    0.01    1.33
  -1  12  -1   -1.21    1.87
  -1  12  -1   -0.89    1.62
   1 -12   1   -1.90    2.17
   1 -12   1   -2.31    1.88
   1 -12   1    1.39    1.70
   1 -12   1   -1.65    1.35
  -1  12  -2    2.72    1.68
  -1  12  -2    0.69    2.16
  -1  12  -2    1.35    1.43
  -1  12  -2    0.98    2.01
   1 -12   2    0.51    2.29
   1 -12   2    7.14    1.84
   1 -12   2    3.03    1.32
   1 -12   2    2.34    1.69
  -1  12  -3    3.46    1.73
  -1  12  -3    7.85    1.56
  -1  12  -3   10.01    2.40
  -1  12  -3    6.89    2.02
   1 -12   3    8.19    1.87
   1 -12   3    9.79    2.41
  -1  12  -4   -0.91    1.53
  -1  12  -4   -0.05    1.85
  -1  12  -4   -1.95    1.85
  -1  12  -4   -1.50    2.32
   1 -12   4    0.30    2.42
  -1  12  -5    2.48    2.10
  -1  12  -5    3.13    1.65
  -1  12  -5    0.78    2.00
  -1  12  -5    9.48    2.68
   1 -12   5    3.47    2.74
  -1  12  -6    8.46    3.00
  -1  12  -6    2.64    1.70
  -1  12  -6    7.27    2.26
  -1  12  -6    4.17    2.16
   1 -12   6    0.68    2.78
  -1  12  -7   -1.05    3.08
  -1  12  -7    1.28    2.30
  -1  12  -7   -0.76    2.37
  -1  12  -8    2.89    2.68
  -1  12  -8   10.00    3.31
  -1  12  -9    1.21    2.84
  -1  12 -10    0.19    3.00
  -1  13  10    1.20    2.68
   1 -13 -10    3.66    2.99
   1 -13 -10    1.40    3.60
  -1  13   9   -2.93    2.36
   1 -13  -9   -1.14    2.18
   1 -13  -9    6.41    2.86
  -1  13   8   -0.76    2.20
  -1  13   8   -4.25    3.79
   1 -13  -8    2.46    1.96
   1 -13  -8    2.17    2.60
  -1  13   7   -0.94    3.05
  -1  13   7    7.31    2.17
   1 -13  -7    8.84    2.50
   1 -13  -7    7.33    1.99
  -1  13   6    2.56    1.99
  -1  13   6    2.58    2.86
   1 -13  -6   -0.39    1.77
   1 -13  -6    1.11    2.59
   1 -13  -6    1.47    2.24
  -1  13   5    5.93    1.90
  -1  13   5    5.62    2.79
   1 -13  -5    7.40    1.84
   1 -13  -5    3.05    2.02
   1 -13  -5    6.53    2.63
   1 -13  -5    4.40    2.25
  -1  13   4    0.34    2.17
  -1  13   4    2.31    2.59
   1 -13  -4   -3.41    2.54
   1 -13  -4    0.36    1.67
   1 -13  -4    0.03    2.09
   1 -13  -4    3.41    2.15
  -1  13   3   -0.16    1.46
  -1  13   3    0.65    2.49
  -1  13   3    2.86    2.08
  -1  13   3    2.18    1.64
   1 -13  -3   -0.07    2.04
   1 -13  -3    4.68    2.54
   1 -13  -3   -2.51    1.91
   1 -13  -3   -0.25    1.55
  -1  13   2   -3.66    2.03
  -1  13   2   -2.87    2.36
  -1  13   2    2.54    1.44
  -1  13   2   -1.08    1.67
   1 -13  -2    3.62    2.01
   1 -13  -2    2.44    2.52
   1 -13  -2   -0.12    1.89
   1 -13  -2    2.45    1.52
   1 -13  -2    3.43    2.38
  -1  13   1    1.37    1.73
  -1  13   1    2.68    2.10
  -1  13   1    0.80    2.32
  -1  13   1    1.48    1.47
   1 -13  -1   -0.65    1.99
   1 -13  -1    2.36    2.26
   1 -13  -1    0.32    2.44
   1 -13  -1    1.38    1.49
  -1  13   0   -1.83    2.02
  -1  13   0    1.17    1.75
  -1  13   0    0.83    1.41
  -1  13   0   -2.22    2.27
   1 -13   0    3.34    2.23
   1 -13   0    0.77    2.42
   1 -13   0    0.15    1.92
   1 -13   0   -0.04    1.47
  -1  13  -1    3.02    1.47
  -1  13  -1    3.53    2.38
  -1  13  -1   -1.07    2.11
  -1  13  -1    2.72    1.82
   1 -13   1    8.13    2.05
   1 -13   1    1.21    1.48
   1 -13   1    4.65    2.56
   1 -13   1    2.40    2.13
  -1  13  -2    4.38    2.17
  -1  13  -2    2.37    1.90
  -1  13  -2    0.69    2.38
  -1  13  -2    2.04    1.55
   1 -13   2    2.65    1.93
   1 -13   2    1.35    2.55
   1 -13   2    1.03    2.02
  -1  13  -3    3.50    2.65
  -1  13  -3   -3.45    1.98
  -1  13  -3   -1.70    2.16
  -1  13  -3    1.87    1.61
   1 -13   3    3.06    2.67
   1 -13   3    0.96    2.08
  -1  13  -4    2.17    2.76
  -1  13  -4    2.00    1.71
  -1  13  -4   -0.63    2.02
  -1  13  -4    0.66    2.18
   1 -13   4    0.00    2.67
  -1  13  -5    1.86    2.05
  -1  13  -5    2.55    2.15
  -1  13  -5    3.11    1.76
  -1  13  -5   -0.84    2.69
   1 -13   5   10.40    3.36
  -1  13  -6    1.46    1.82
  -1  13  -6   -1.41    2.35
  -1  13  -6   -0.59    3.38
  -1  13  -6    1.31    2.34
  -1  13  -7    8.01    1.97
  -1  13  -8    1.06    2.05
  -1  13  -8    1.95    2.84
  -1  13  -9    2.60    3.09
  -1  14   9   -1.25    2.59
   1 -14  -9    2.96    2.33
  -1  14   8    7.47    2.38
   1 -14  -8    8.72    3.00
   1 -14  -8    4.89    3.00
  -1  14   7    3.49    2.14
   1 -14  -7    6.83    2.49
   1 -14  -7   -1.57    2.63
   1 -14  -7   -6.23    3.22
   1 -14  -6    8.63    2.13
   1 -14  -6    8.38    2.58
   1 -14  -6    3.51    3.15
  -1  14   5   -3.01    2.01
   1 -14  -5   -1.46    1.84
   1 -14  -5   -0.38    2.47
   1 -14  -5    0.71    2.98
  -1  14   4    0.86    2.34
  -1  14   4   -3.16    2.82
   1 -14  -4   -2.40    2.96
   1 -14  -4    1.86    2.36
   1 -14  -4    3.11    1.80
  -1  14   3   -2.92    2.29
  -1  14   3    0.02    1.60
  -1  14   3    0.03    1.84
   1 -14  -3    2.78    3.26
   1 -14  -3    1.96    2.18
   1 -14  -3    6.68    2.75
   1 -14  -3    1.51    1.73
   1 -14  -3    2.17    2.88
  -1  14   2   -2.81    2.36
  -1  14   2    1.64    1.94
  -1  14   2    0.63    1.57
  -1  14   2   -0.55    2.41
   1 -14  -2   -3.70    2.88
   1 -14  -2    7.99    2.73
   1 -14  -2   -0.35    2.10
   1 -14  -2   -0.53    1.72
  -1  14   1    1.18    2.51
  -1  14   1   -0.68    1.63
  -1  14   1   -2.48    2.29
  -1  14   1   -2.82    1.88
   1 -14  -1   -0.39    1.65
   1 -14  -1    1.49    2.15
   1 -14  -1   -0.16    2.54
   1 -14  -1   -0.77    2.81
  -1  14   0    6.09    2.03
  -1  14   0    7.50    2.51
  -1  14   0   14.23    2.45
  -1  14   0    9.89    1.72
   1 -14   0    6.51    2.34
   1 -14   0    9.20    2.90
   1 -14   0    8.67    1.78
   1 -14   0    9.27    2.68
  -1  14  -1    8.20    2.55
  -1  14  -1    5.75    1.68
  -1  14  -1    7.18    1.96
  -1  14  -1    8.17    2.40
   1 -14   1   -2.67    2.88
   1 -14   1    5.89    2.35
   1 -14   1    5.01    2.48
   1 -14   1    5.20    1.68
  -1  14  -2    8.05    2.77
  -1  14  -2    7.71    2.45
  -1  14  -2    6.70    1.67
  -1  14  -2    5.46    2.00
   1 -14   2   13.50    2.41
   1 -14   2    5.09    2.82
   1 -14   2    6.35    2.21
   1 -14   2    7.09    1.70
  -1  14  -3   -3.03    2.39
  -1  14  -3    3.02    1.68
   1 -14   3    2.83    2.32
   1 -14   3    1.10    4.15
  -1  14  -4   -0.31    1.81
  -1  14  -4   -3.17    2.51
   1 -14   4   -2.47    2.27
  -1  14  -5   -3.39    1.89
  -1  14  -5   -1.54    2.55
  -1  14  -6    7.44    2.96
  -1  14  -6    6.50    2.05
  -1  14  -7    7.22    2.84
  -1  14  -7    5.37    2.17
  -1  14  -8    5.50    2.95
  -1  15   7    8.25    2.50
   1 -15  -7    8.57    2.41
   1 -15  -7    7.28    3.03
  -1  15   6    0.09    2.41
   1 -15  -6    1.19    3.23
   1 -15  -6   -1.20    2.22
  -1  15   5    2.33    2.28
   1 -15  -5    2.13    3.30
   1 -15  -5    3.53    2.21
   1 -15  -5    5.03    3.29
  -1  15   4    0.51    2.68
   1 -15  -4    1.27    2.43
   1 -15  -4   -0.77    3.05
  -1  15   3    1.69    1.78
  -1  15   3    2.54    1.98
  -1  15   3   -1.86    2.62
   1 -15  -3   -0.70    2.29
   1 -15  -3    1.36    3.06
  -1  15   2   -2.09    1.99
  -1  15   2    1.35    1.80
  -1  15   2   -0.63    2.70
   1 -15  -2    0.22    2.69
   1 -15  -2    2.12    1.90
   1 -15  -2   -0.05    3.01
  -1  15   1    8.72    1.84
  -1  15   1    7.91    2.71
   1 -15  -1   17.23    3.05
   1 -15  -1    5.55    3.09
   1 -15  -1    6.35    1.97
  -1  15   0    1.54    1.78
  -1  15   0    1.62    2.67
   1 -15   0   -1.45    2.89
   1 -15   0    1.46    1.81
  -1  15  -1    8.39    2.66
  -1  15  -1    7.04    1.88
   1 -15   1   17.18    2.95
   1 -15   1    8.33    1.97
   1 -15   1    4.14    2.42
  -1  15  -2   -0.66    2.67
  -1  15  -2    3.52    1.79
   1 -15   2    2.66    1.85
   1 -15   2   -1.69    2.70
   1 -15   2    2.51    2.35
  -1  15  -3    3.28    2.38
  -1  15  -3   -1.79    3.10
   1 -15   3   -1.42    2.66
  -1  15  -4    3.48    3.22
   1 -15   4   -1.79    2.66
  -1  15  -5    1.26    2.20
  -1  15  -5   -0.62    2.96
  -1  15  -6    2.78    2.17
  -1  15  -6    0.61    2.87
  -1  15  -7    0.06    2.96
  -1  15  -7    1.68    2.22
  -1  16   6    0.44    2.47
   1 -16  -6    4.45    2.92
   1 -16  -6    0.70    2.32
  -1  16   5    0.05    2.42
   1 -16  -5    1.95    2.36
   1 -16  -5    1.89    2.79
  -1  16   4    4.63    3.21
   1 -16  -4   -5.49    2.21
  -1  16   3   10.52    3.13
  -1  16   3    3.76    2.16
   1 -16  -3    5.45    2.24
  -1  16   2    3.53    3.05
   1 -16  -2    1.20    2.16
  -1  16   1    0.83    3.10
  -1  16   1    2.84    2.07
   1 -16  -1    1.34    2.11
  -1  16   0    5.08    2.01
  -1  16   0    0.93    5.21
   1 -16   0    4.04    2.38
   1 -16   0    6.93    3.39
  -1  16  -1    7.52    2.02
  -1  16  -1    5.60    3.57
   1 -16   1    0.84    3.39
   1 -16   1    4.22    2.99
  -1  16  -2    3.06    3.07
  -1  16  -2    2.49    1.97
   1 -16   2    0.54    2.12
   1 -16   2   -1.89    3.08
  -1  16  -3    3.37    2.02
  -1  16  -3    6.95    3.11
   1 -16   3    2.54    3.09
  -1  16  -4    4.88    3.11
  -1  16  -4    1.22    2.08
  -1  16  -5    3.21    3.23
  -1  16  -5   -1.26    2.16
  -1  17   3   -0.48    3.45
  -1  17   3   -3.27    2.24
   1 -17  -3   -1.83    2.32
  -1  17   2    2.86    2.26
  -1  17   2   14.66    3.56
   1 -17  -2    2.92    2.36
  -1  17   1    3.36    3.43
  -1  17   1   -0.04    2.08
   1 -17  -1    3.38    2.32
  -1  17   0    4.81    3.41
  -1  17   0   -1.54    2.09
   1 -17   0    3.24    2.30
  -1  17  -1    2.22    3.31
  -1  17  -1    3.60    2.18
   1 -17   1   -0.34    2.39
  -1  17  -2    2.36    3.37
  -1  17  -2    2.06    2.15
   1 -17   2    0.38    2.48
  -1  17  -3   -0.10    2.24
  -1  17  -3    1.99    3.40
   1 -17   3    0.23    3.83
   2  17  -3    2.85    3.17
   2  17  -3    0.62    2.18
  -2 -17   2    8.21    2.51
  -2 -17   2    2.47    3.71
   2  17  -2    8.50    3.42
   2  17  -2    6.18    2.15
  -2 -17   1    2.26    3.57
  -2 -17   1    1.70    2.32
   2  17  -1   -2.21    3.23
   2  17  -1   -3.19    2.13
  -2 -17   0   -2.74    2.30
   2  17   0    2.79    2.18
   2  17   0    0.94    3.25
  -2 -17  -1    0.58    2.39
   2  17   1    8.51    3.41
   2  17   1   -0.43    2.11
  -2 -17  -2    0.29    2.43
   2  17   2    0.25    3.38
   2  17   2    2.25    2.41
   2  17   2   -0.20    2.34
   2  16  -6    5.67    3.10
   2  16  -6    2.96    2.11
   2  16  -5   -0.55    2.01
   2  16  -5    6.99    3.12
   2  16  -4    4.68    2.89
   2  16  -4    2.52    1.96
  -2 -16   3    3.67    4.77
   2  16  -3    7.72    3.03
   2  16  -3    4.22    2.03
  -2 -16   2   10.70    3.26
  -2 -16   2    1.90    2.25
   2  16  -2    1.19    1.96
   2  16  -2    5.95    2.88
  -2 -16   1    4.57    3.12
  -2 -16   1   10.81    3.38
   2  16  -1    3.68    1.96
   2  16  -1    7.33    3.04
  -2 -16   0   14.71    3.30
  -2 -16   0    1.59    2.16
   2  16   0    7.34    2.95
   2  16   0    6.52    2.04
  -2 -16  -1   -0.08    2.15
   2  16   1    2.96    1.96
   2  16   1    6.52    3.20
  -2 -16  -2    1.11    2.25
   2  16   2    6.25    3.08
   2  16   2    1.47    2.38
   2  16   2    4.62    2.37
  -2 -16  -3    1.51    2.17
   2  16   3    2.31    2.33
  -2 -16  -4    2.78    2.24
   2  16   4   -0.10    2.39
  -2 -16  -5    4.14    2.37
   2  16   5    2.87    2.42
   2  15  -7   13.11    2.17
   2  15  -7   11.07    3.17
   2  15  -6   -0.56    1.98
   2  15  -6    5.58    2.86
   2  15  -5   -0.61    2.25
   2  15  -5    6.97    2.78
   2  15  -4    1.63    3.13
   2  15  -3    1.40    2.37
   2  15  -3   -0.80    4.30
  -2 -15   2   -0.95    2.48
  -2 -15   2    1.68    1.77
   2  15  -2   -1.14    2.51
   2  15  -2   -1.86    1.78
  -2 -15   1    4.58    3.00
  -2 -15   1    9.51    2.80
  -2 -15   1    2.21    1.85
   2  15  -1    8.95    2.69
   2  15  -1    6.99    1.83
  -2 -15   0    1.90    1.89
  -2 -15   0    7.46    2.96
   2  15   0    0.12    2.47
   2  15   0   -0.39    1.78
  -2 -15  -1    4.94    2.08
   2  15   1    7.03    1.83
   2  15   1    7.36    2.76
  -2 -15  -2    4.47    2.21
   2  15   2    1.71    2.05
   2  15   2    3.30    1.84
   2  15   2    0.31    3.59
  -2 -15  -3    0.45    3.41
   2  15   3    1.48    2.13
   2  15   3    4.56    1.84
   2  15   3    6.95    2.81
  -2 -15  -4    1.30    2.08
   2  15   4   -1.70    2.29
  -2 -15  -5   -1.17    2.11
   2  15   5   -0.56    2.23
  -2 -15  -6   -2.01    2.23
   2  15   6    3.59    2.31
  -2 -15  -7    3.88    2.41
   2  15   7    1.55    2.38
   2  14  -9    1.65    3.20
   2  14  -8    1.54    3.05
   2  14  -8    2.74    3.29
   2  14  -7    1.40    2.89
   2  14  -7   -0.35    1.94
   2  14  -6    7.96    1.98
   2  14  -5   -3.63    2.44
   2  14  -5   -1.38    1.79
   2  14  -4    6.03    1.77
   2  14  -4    6.86    2.40
  -2 -14   3    1.22    1.59
   2  14  -3    3.39    1.69
   2  14  -3    1.44    2.33
  -2 -14   2   -0.88    1.49
  -2 -14   2    0.22    2.31
  -2 -14   2    5.77    2.90
   2  14  -2    1.88    2.03
   2  14  -2    2.25    2.31
   2  14  -2   -0.28    2.68
   2  14  -2   -0.10    1.63
  -2 -14   1   -1.78    2.75
  -2 -14   1    1.52    1.65
  -2 -14   1   -4.49    2.33
  -2 -14   1    4.22    2.38
   2  14  -1    0.47    1.62
   2  14  -1    1.32    2.62
   2  14  -1    1.09    2.32
   2  14  -1   -5.03    1.89
  -2 -14   0   17.11    2.47
  -2 -14   0    9.06    2.92
  -2 -14   0   12.41    1.83
   2  14   0   12.73    2.47
   2  14   0   15.04    2.84
   2  14   0    7.33    2.04
   2  14   0   14.84    1.78
  -2 -14  -1    0.10    2.12
  -2 -14  -1    0.23    1.71
  -2 -14  -1   -0.07    2.83
   2  14   1    0.01    2.37
   2  14   1    2.93    1.66
   2  14   1    3.65    2.75
   2  14   1    1.46    1.95
  -2 -14  -2    9.98    1.84
  -2 -14  -2    6.97    2.95
  -2 -14  -2   10.32    3.16
   2  14   2    8.85    2.51
   2  14   2    7.81    1.72
   2  14   2    6.82    2.88
   2  14   2    7.60    2.04
  -2 -14  -3    3.69    1.92
  -2 -14  -3    1.58    2.98
   2  14   3    2.26    1.87
   2  14   3    3.15    2.89
   2  14   3    0.45    1.94
   2  14   3   -1.15    1.60
  -2 -14  -4   -3.45    2.99
  -2 -14  -4   -2.77    1.77
   2  14   4    2.59    2.00
   2  14   4    5.57    2.94
  -2 -14  -5   -4.79    4.80
  -2 -14  -5    1.04    2.02
   2  14   5   -0.19    2.34
   2  14   5   -1.26    3.05
  -2 -14  -6   12.66    3.16
   2  14   6    3.05    3.21
   2  14   6   10.65    2.38
  -2 -14  -7    2.97    2.35
   2  14   7   -2.11    2.27
   2  14   7   -5.39    3.26
  -2 -14  -8    4.78    2.32
   2  14   8    8.28    5.45
   2  14   8    6.77    2.55
   2  13 -10    1.56    3.24
   2  13  -9    4.02    3.00
   2  13  -9    2.05    2.02
   2  13  -8    1.80    1.85
   2  13  -7    7.13    1.84
   2  13  -7   10.51    2.72
   2  13  -6    2.73    2.17
   2  13  -6   -1.49    2.37
   2  13  -6   -1.52    1.69
  -2 -13   5   -1.97    2.72
   2  13  -5    9.67    2.32
   2  13  -5    5.57    1.68
   2  13  -5    5.36    2.08
   2  13  -5    1.50    2.79
  -2 -13   4   -0.81    2.66
   2  13  -4    0.02    2.05
   2  13  -4   -2.20    1.54
   2  13  -4   -1.64    2.73
   2  13  -4   -1.09    2.12
  -2 -13   3    7.20    2.74
  -2 -13   3    8.18    1.58
   2  13  -3    9.39    2.10
   2  13  -3    7.56    1.60
   2  13  -3   11.64    2.25
   2  13  -3   10.85    2.85
  -2 -13   2   -0.58    2.05
  -2 -13   2    1.40    1.39
  -2 -13   2    5.04    2.66
   2  13  -2    3.23    1.51
   2  13  -2    6.44    2.65
   2  13  -2    1.11    2.07
   2  13  -2    2.51    1.97
  -2 -13   1    2.08    2.15
  -2 -13   1   -1.72    2.09
  -2 -13   1    0.64    1.42
  -2 -13   1   -6.56    2.61
   2  13  -1   -0.27    1.99
   2  13  -1    1.08    1.82
   2  13  -1   -0.59    1.43
   2  13  -1   -0.04    2.53
  -2 -13   0   -3.39    2.66
  -2 -13   0    1.83    2.08
  -2 -13   0    1.94    1.49
   2  13   0    0.84    2.57
   2  13   0   -2.79    2.00
   2  13   0    1.37    1.47
   2  13   0   -2.09    1.79
  -2 -13  -1    4.32    2.70
  -2 -13  -1    8.10    1.64
  -2 -13  -1   10.64    2.14
   2  13   1   10.05    2.48
   2  13   1    9.55    1.59
   2  13   1    9.24    1.80
   2  13   1    9.38    2.20
  -2 -13  -2    0.35    1.55
  -2 -13  -2    2.21    2.71
   2  13   2    2.41    2.49
   2  13   2   -1.07    1.72
   2  13   2   -0.27    1.40
   2  13   2   -1.18    2.06
  -2 -13  -3    1.79    1.64
  -2 -13  -3    1.21    2.74
   2  13   3    2.20    2.51
   2  13   3    4.25    1.91
   2  13   3    2.00    1.70
  -2 -13  -4    1.46    2.04
  -2 -13  -4    1.79    2.93
  -2 -13  -4   -0.80    1.67
   2  13   4    2.49    1.88
   2  13   4   -0.74    2.60
  -2 -13  -5   -1.06    2.59
  -2 -13  -5   -1.84    1.78
  -2 -13  -5    1.70    3.15
   2  13   5    1.04    2.78
   2  13   5    4.66    1.93
  -2 -13  -6    4.04    3.31
  -2 -13  -6   -0.45    1.87
   2  13   6    2.83    2.03
   2  13   6    0.77    2.98
  -2 -13  -7    4.13    1.95
  -2 -13  -7    9.40    3.39
   2  13   7    4.67    2.61
  -2 -13  -8   -0.65    2.10
   2  13   8    0.79    3.69
   2  13   8   -0.21    2.41
   2  13   9   -1.04    2.37
   2  12 -11    4.62    3.07
   2  12 -10    2.31    2.92
   2  12  -9    3.38    2.71
   2  12  -8    0.07    1.70
   2  12  -8   -1.69    2.55
  -2 -12   7    1.17    2.77
   2  12  -7    2.74    1.64
   2  12  -7   12.44    2.92
   2  12  -7    0.28    2.30
   2  12  -7    2.00    2.47
  -2 -12   6    8.02    2.73
   2  12  -6    6.93    2.91
   2  12  -6    2.23    2.12
   2  12  -6    4.05    2.31
   2  12  -6    2.70    1.56
  -2 -12   5   -1.84    2.61
   2  12  -5    2.08    2.11
   2  12  -5    4.07    1.96
   2  12  -5   -0.30    1.54
   2  12  -5   -1.62    2.57
  -2 -12   4    1.69    2.43
   2  12  -4    3.03    2.58
   2  12  -4    2.67    1.84
   2  12  -4    1.54    1.98
   2  12  -4    1.67    1.43
  -2 -12   3    5.46    2.48
   2  12  -3    4.69    1.44
   2  12  -3    8.66    2.52
   2  12  -3    4.31    1.95
   2  12  -3    4.92    1.78
  -2 -12   2   -0.27    2.36
  -2 -12   2    1.73    1.79
  -2 -12   2    1.00    1.25
   2  12  -2    1.73    1.37
   2  12  -2   -0.91    1.84
   2  12  -2    3.32    1.68
   2  12  -2    6.80    2.39
  -2 -12   1    5.70    2.32
  -2 -12   1    6.42    1.38
  -2 -12   1    6.10    1.86
   2  12  -1    4.46    1.42
   2  12  -1    3.72    1.92
   2  12  -1    8.63    2.28
   2  12  -1    5.32    1.65
  -2 -12   0    5.13    2.32
  -2 -12   0    6.77    1.82
  -2 -12   0    3.84    1.42
   2  12   0    3.41    1.58
   2  12   0    4.13    2.00
   2  12   0    6.96    1.44
   2  12   0   10.17    2.34
  -2 -12  -1   -5.17    2.28
  -2 -12  -1    1.74    1.39
   2  12   1    3.12    2.12
   2  12   1   -1.79    1.87
   2  12   1   -0.55    1.33
   2  12   1    1.44    1.49
  -2 -12  -2    1.70    1.46
  -2 -12  -2    4.13    2.39
   2  12   2    1.92    1.47
   2  12   2    0.98    1.33
   2  12   2   -0.52    1.83
   2  12   2   -1.63    2.11
  -2 -12  -3   12.26    1.97
  -2 -12  -3    8.08    2.59
  -2 -12  -3    9.32    1.56
   2  12   3   13.04    1.84
   2  12   3   11.22    2.39
  -2 -12  -4   -0.88    1.54
  -2 -12  -4    3.34    2.66
  -2 -12  -4    3.62    1.95
   2  12   4    0.41    2.24
   2  12   4    0.94    1.80
  -2 -12  -5    8.58    2.15
  -2 -12  -5    1.34    1.65
  -2 -12  -5    3.48    2.87
   2  12   5    2.67    1.79
  -2 -12  -6    5.17    2.24
  -2 -12  -6    5.25    1.75
  -2 -12  -6   -0.40    2.88
   2  12   6    3.74    1.87
  -2 -12  -7    3.04    2.23
  -2 -12  -7    3.45    3.11
  -2 -12  -7    2.23    1.76
   2  12   7   -2.73    1.99
  -2 -12  -8    3.06    1.95
  -2 -12  -8    8.63    3.38
  -2 -12  -9    6.37    3.46
   2  12   9    3.02    2.34
   2  12  10   -1.82    2.42
   2  11 -11    5.55    4.56
   2  11 -10    4.02    2.73
  -2 -11   9    2.72    3.43
   2  11  -9   -0.33    2.42
  -2 -11   8    9.08    2.96
   2  11  -8   17.94    2.49
  -2 -11   7    3.97    2.67
   2  11  -7    3.94    2.14
   2  11  -7    8.04    2.80
  -2 -11   6    2.00    2.44
   2  11  -6    0.76    1.79
   2  11  -6    1.44    2.07
   2  11  -6    0.76    2.50
   2  11  -6    1.52    1.45
  -2 -11   5    2.51    2.31
   2  11  -5    7.98    2.37
   2  11  -5    3.15    2.00
   2  11  -5    1.67    1.69
   2  11  -5    5.69    1.39
  -2 -11   4   23.00    2.44
   2  11  -4   21.18    1.86
   2  11  -4   21.20    2.14
   2  11  -4   24.13    2.21
   2  11  -4   22.45    2.52
  -2 -11   3    3.06    2.09
   2  11  -3    2.74    2.15
   2  11  -3    1.94    1.32
   2  11  -3    1.21    1.55
   2  11  -3    0.68    1.69
  -2 -11   2   14.11    1.41
  -2 -11   2   23.28    1.86
  -2 -11   2   23.22    2.27
   2  11  -2   25.28    2.31
   2  11  -2   21.06    2.05
   2  11  -2   17.53    1.70
   2  11  -2   18.85    2.01
  -2 -11   1    0.03    2.05
  -2 -11   1    1.88    1.21
  -2 -11   1    0.86    1.55
   2  11  -1    1.89    1.39
   2  11  -1    2.54    1.25
   2  11  -1    0.32    1.93
   2  11  -1   -1.03    1.70
  -2 -11   0   -0.09    1.24
  -2 -11   0    2.09    2.04
   2  11   0   -0.04    1.71
   2  11   0   -0.95    1.85
   2  11   0   -0.63    1.37
   2  11   0   -0.71    1.18
  -2 -11  -1   -2.83    2.01
  -2 -11  -1    1.92    1.25
   2  11   1   -2.61    1.67
   2  11   1   -2.23    1.31
   2  11   1    2.32    1.91
   2  11   1    0.42    1.25
  -2 -11  -2   18.37    1.75
  -2 -11  -2   24.01    2.34
  -2 -11  -2   16.11    1.51
   2  11   2   15.18    1.92
   2  11   2   16.93    1.53
   2  11   2   22.57    2.00
   2  11   2   22.27    2.09
  -2 -11  -3    1.24    1.31
  -2 -11  -3    3.03    2.28
  -2 -11  -3    2.92    1.64
   2  11   3    5.13    1.98
   2  11   3    0.86    1.56
   2  11   3    0.98    1.35
  -2 -11  -4   13.47    2.46
  -2 -11  -4    9.28    1.83
  -2 -11  -4    9.00    1.54
   2  11   4    8.12    2.14
   2  11   4    9.43    1.77
  -2 -11  -5   -1.68    1.48
  -2 -11  -5    4.98    2.44
  -2 -11  -5    0.12    1.81
   2  11   5    3.23    1.66
   2  11   5    2.84    2.22
  -2 -11  -6    0.05    1.90
  -2 -11  -6    3.91    2.58
  -2 -11  -6    4.40    1.62
   2  11   6    4.79    1.85
  -2 -11  -7    0.48    2.80
  -2 -11  -7   -3.98    2.05
   2  11   7   -0.70    1.82
  -2 -11  -8   -0.38    3.06
   2  11   8    1.70    2.00
  -2 -11  -9   -5.66    3.42
   2  11   9   -0.36    3.25
  -2 -11 -10    9.10    3.47
   2  11  10    2.48    2.42
   2  11  11    1.72    2.45
   2  10 -11   15.86    2.94
  -2 -10  10    1.31    3.05
   2  10 -10   -1.02    2.42
  -2 -10   9   17.39    3.10
   2  10  -9   20.01    2.59
  -2 -10   8   -5.38    2.55
   2  10  -8    1.89    2.13
  -2 -10   7    9.58    2.48
   2  10  -7    9.90    2.03
  -2 -10   6    4.98    2.16
   2  10  -6    4.54    1.34
   2  10  -6    7.49    1.91
  -2 -10   5   20.66    2.29
   2  10  -5   21.30    1.75
   2  10  -5   23.44    2.08
   2  10  -5   25.84    2.86
   2  10  -5   26.37    2.87
  -2 -10   4   13.62    2.04
   2  10  -4   12.09    1.36
   2  10  -4   13.19    1.53
   2  10  -4    9.78    1.81
   2  10  -4   13.37    2.04
  -2 -10   3   35.91    2.99
   2  10  -3   33.18    2.69
   2  10  -3   29.71    2.75
   2  10  -3   33.64    2.05
   2  10  -3   29.22    2.28
  -2 -10   2    1.23    1.43
  -2 -10   2   -0.44    1.79
  -2 -10   2   -0.12    1.00
   2  10  -2    3.09    1.20
   2  10  -2   -1.61    1.27
   2  10  -2    0.94    1.54
   2  10  -2    1.40    1.83
  -2 -10   1   31.87    2.93
  -2 -10   1   33.76    1.99
   2  10  -1   34.75    2.05
   2  10  -1   34.28    2.60
   2  10  -1   30.44    2.17
   2  10  -1   31.00    2.70
  -2 -10   0   -1.76    1.74
  -2 -10   0    1.78    1.14
   2  10   0    1.39    1.19
   2  10   0   -0.40    1.54
   2  10   0    0.06    1.65
   2  10   0    1.55    1.13
  -2 -10  -1    0.38    1.13
  -2 -10  -1    4.68    1.36
  -2 -10  -1    2.14    1.77
   2  10   1   -1.20    1.10
   2  10   1   -0.07    1.68
   2  10   1   -0.65    1.45
   2  10   1    0.96    1.18
  -2 -10  -2    5.73    1.92
  -2 -10  -2    5.59    1.42
  -2 -10  -2    5.40    1.22
   2  10   2    4.77    1.19
   2  10   2    7.18    1.69
   2  10   2    5.51    1.15
   2  10   2    4.89    1.62
  -2 -10  -3   18.48    1.65
  -2 -10  -3   18.43    2.20
  -2 -10  -3   17.55    1.49
   2  10   3   20.10    1.78
   2  10   3   14.66    1.35
   2  10   3   19.84    1.95
  -2 -10  -4    0.35    1.31
  -2 -10  -4    3.19    2.05
  -2 -10  -4    1.70    1.48
   2  10   4   -0.91    1.47
  -2 -10  -5   17.97    1.78
  -2 -10  -5   18.66    1.65
  -2 -10  -5   17.92    2.30
   2  10   5   17.34    1.87
  -2 -10  -6   -0.77    2.32
  -2 -10  -6    1.17    1.39
   2  10   6   -0.92    1.70
  -2 -10  -7    8.28    2.56
  -2 -10  -7    6.47    1.87
   2  10   7    2.85    1.85
  -2 -10  -8    7.08    2.76
   2  10   8    0.43    1.84
  -2 -10  -9   16.74    3.15
   2  10   9   13.08    2.21
  -2 -10 -10    9.51    3.48
   2  10  10    0.89    2.35
   2  10  11    8.83    2.54
   2   9 -12    1.89    2.85
   2   9 -12   11.60    3.05
   2   9 -11    8.63    2.70
  -2  -9  10    0.61    3.11
   2   9 -10    1.01    2.39
  -2  -9   9   -1.20    2.56
   2   9  -9    1.80    2.17
  -2  -9   8    8.81    2.48
   2   9  -8    8.21    2.11
  -2  -9   7   18.13    2.33
   2   9  -7   20.09    2.11
  -2  -9   6   -1.17    1.88
   2   9  -6   -2.02    1.57
  -2  -9   5    0.68    1.81
   2   9  -5    0.33    1.56
   2   9  -5   -0.15    1.29
   2   9  -5   -0.52    1.10
  -2  -9   4   21.44    1.96
   2   9  -4   22.77    1.85
   2   9  -4   18.29    1.85
   2   9  -4   24.04    2.01
  -2  -9   3    0.72    1.67
   2   9  -3    3.04    1.11
   2   9  -3    1.78    1.50
   2   9  -3    0.41    1.14
   2   9  -3    1.35    1.60
  -2  -9   2   16.54    1.43
  -2  -9   2   15.26    1.84
  -2  -9   2   11.32    1.09
   2   9  -2   13.52    1.64
   2   9  -2   16.23    1.33
   2   9  -2   17.76    1.80
   2   9  -2   15.40    1.28
  -2  -9   1   36.26    1.91
  -2  -9   1   36.69    2.70
   2   9  -1   39.73    2.43
   2   9  -1   37.00    2.00
   2   9  -1   37.82    2.08
   2   9  -1   38.20    2.57
  -2  -9   0   -2.55    1.54
  -2  -9   0   -0.42    1.18
  -2  -9   0    0.27    1.01
   2   9   0    0.07    1.03
   2   9   0    0.09    1.50
   2   9   0   -3.40    1.38
   2   9   0    0.59    1.07
  -2  -9  -1   21.45    1.73
  -2  -9  -1   20.27    1.92
  -2  -9  -1   20.18    1.96
   2   9   1   22.89    1.77
   2   9   1   20.53    1.72
   2   9   1   21.35    2.28
   2   9   1   21.10    2.14
  -2  -9  -2   24.07    2.68
  -2  -9  -2   26.32    1.82
  -2  -9  -2   24.69    2.00
   2   9   2   22.61    2.31
   2   9   2   23.29    1.78
   2   9   2   24.98    1.73
   2   9   2   23.56    2.15
  -2  -9  -3   -0.63    1.11
  -2  -9  -3    0.40    1.22
  -2  -9  -3    2.04    1.72
   2   9   3   -0.72    1.35
   2   9   3    0.14    1.52
  -2  -9  -4    2.43    1.22
  -2  -9  -4    2.73    1.34
  -2  -9  -4    3.52    1.81
   2   9   4    1.39    1.35
   2   9   4    1.12    1.63
  -2  -9  -5    5.20    1.25
  -2  -9  -5    9.97    2.04
  -2  -9  -5   10.28    1.48
   2   9   5    6.24    1.57
  -2  -9  -6   -0.37    2.05
  -2  -9  -6    0.47    1.29
   2   9   6   -1.58    1.55
  -2  -9  -7   19.63    2.50
   2   9   7   13.87    1.82
  -2  -9  -8   11.63    2.65
   2   9   8    6.43    1.87
  -2  -9  -9    1.90    2.77
   2   9   9    0.54    1.92
  -2  -9 -10   -0.06    3.09
   2   9  10    2.18    2.06
   2   9  11   -0.62    2.22
  -2  -9 -12    2.68    3.94
   2   9  12    2.93    2.71
   2   8 -13   -4.96    2.98
   2   8 -12   17.31    2.92
   2   8 -12   12.86    2.87
   2   8 -11   17.80    2.70
   2   8 -11   17.98    2.67
   2   8 -10    3.12    2.28
  -2  -8   9    6.34    2.41
   2   8  -9    5.82    2.11
  -2  -8   8   29.40    3.40
   2   8  -8   32.35    3.00
  -2  -8   7    8.29    2.00
   2   8  -7    6.72    1.78
  -2  -8   6   66.64    3.30
   2   8  -6   63.99    3.14
  -2  -8   5    3.16    1.66
   2   8  -5    1.70    1.40
  -2  -8   4   -0.04    1.50
   2   8  -4    1.76    1.48
   2   8  -4    0.86    1.11
   2   8  -4    2.07    1.04
  -2  -8   3    5.26    1.53
   2   8  -3    4.95    1.08
   2   8  -3    5.23    1.13
   2   8  -3    3.29    1.42
  -2  -8   2    0.98    1.52
  -2  -8   2    1.94    0.82
  -2  -8   2    1.44    1.12
   2   8  -2   -0.85    1.39
   2   8  -2    1.12    1.36
   2   8  -2    2.12    1.00
   2   8  -2   -0.19    1.01
  -2  -8   1   44.47    1.97
  -2  -8   1   50.21    2.67
   2   8  -1   47.10    2.08
   2   8  -1   47.74    2.49
   2   8  -1   43.99    2.56
   2   8  -1   46.53    2.08
  -2  -8   0   18.67    1.58
  -2  -8   0   18.00    1.34
  -2  -8   0   17.54    1.68
   2   8   0   19.04    1.61
   2   8   0   15.74    1.56
   2   8   0   19.81    1.63
  -2  -8  -1   23.53    1.81
  -2  -8  -1   23.67    2.40
  -2  -8  -1   21.17    1.64
   2   8   1   19.30    1.92
   2   8   1   18.19    2.12
   2   8   1   21.87    1.67
   2   8   1   21.08    1.94
  -2  -8  -2   32.68    1.81
  -2  -8  -2   31.78    2.51
  -2  -8  -2   27.93    1.94
   2   8   2   30.88    1.73
   2   8   2   30.42    1.77
   2   8   2   32.10    2.08
   2   8   2   30.51    2.29
  -2  -8  -3   10.62    1.27
  -2  -8  -3   12.13    1.20
  -2  -8  -3   12.52    1.70
   2   8   3   14.41    1.54
   2   8   3   10.44    1.47
  -2  -8  -4    9.66    1.76
  -2  -8  -4    7.22    1.12
  -2  -8  -4    9.53    1.25
   2   8   4    9.51    1.44
  -2  -8  -5   14.94    1.91
   2   8   5   10.95    1.57
  -2  -8  -6   12.64    2.00
   2   8   6    7.94    1.62
  -2  -8  -7    8.97    2.18
   2   8   7    6.14    1.61
  -2  -8  -8   19.80    2.52
   2   8   8   12.40    1.83
  -2  -8  -9    8.61    2.61
   2   8   9   10.47    1.87
  -2  -8 -10    1.09    2.90
   2   8  10   -1.00    1.96
  -2  -8 -11    0.06    3.34
   2   8  12    3.43    2.65
   2   7 -13   13.70    3.09
   2   7 -13   17.18    3.05
   2   7 -12   -0.15    2.53
   2   7 -12   -1.05    2.70
   2   7 -11    8.21    2.36
   2   7 -11    7.67    2.42
   2   7 -10    4.94    2.15
  -2  -7   9   -3.17    2.14
   2   7  -9   -1.04    1.92
  -2  -7   8    2.46    1.98
   2   7  -8    6.10    1.78
  -2  -7   7   53.16    3.10
   2   7  -7   54.75    2.97
  -2  -7   6    7.67    1.58
   2   7  -6    5.41    1.52
  -2  -7   5   28.74    2.44
   2   7  -5   25.66    2.32
  -2  -7   4    3.21    1.65
   2   7  -4    3.70    1.33
   2   7  -4    4.61    1.05
  -2  -7   3    5.31    1.49
   2   7  -3    5.05    1.42
   2   7  -3    8.84    1.06
   2   7  -3    7.05    1.00
  -2  -7   2   10.89    0.99
  -2  -7   2   12.39    1.54
   2   7  -2   12.55    1.10
   2   7  -2   11.08    1.45
   2   7  -2   12.19    1.08
  -2  -7   1  110.16    3.47
  -2  -7   1  117.46    3.94
  -2  -7   1  120.32    3.59
   2   7  -1  120.66    3.75
   2   7  -1  110.79    3.87
   2   7  -1  109.72    3.53
   2   7  -1  118.22    3.53
  -2  -7   0   14.91    1.19
  -2  -7   0   16.05    1.49
  -2  -7   0   15.61    1.60
   2   7   0   13.64    1.50
   2   7   0   19.35    1.54
   2   7   0   15.09    1.12
   2   7   0   16.44    1.54
  -2  -7  -1  110.27    3.76
  -2  -7  -1  106.36    3.38
  -2  -7  -1  103.67    3.31
   2   7   1  107.58    3.49
   2   7   1  106.44    3.32
   2   7   1  104.31    3.66
   2   7   1  107.24    3.31
  -2  -7  -2   45.77    2.53
  -2  -7  -2   44.35    2.06
  -2  -7  -2   41.86    1.96
   2   7   2   42.40    2.21
   2   7   2   45.40    1.88
  -2  -7  -3   14.25    1.19
  -2  -7  -3   12.16    1.47
  -2  -7  -3   13.26    1.72
   2   7   3   16.66    1.79
  -2  -7  -4    0.19    0.97
  -2  -7  -4    1.03    1.76
  -2  -7  -4   -0.20    1.73
   2   7   4    0.82    1.24
  -2  -7  -5   47.70    2.85
   2   7   5   44.53    2.47
  -2  -7  -6    8.86    1.77
   2   7   6    7.53    1.46
  -2  -7  -7   72.65    3.61
   2   7   7   66.93    3.19
  -2  -7  -8   16.49    2.31
   2   7   8   11.89    1.83
  -2  -7  -9    0.63    2.18
   2   7   9    1.23    1.72
  -2  -7 -10   -1.81    2.26
   2   7  10    2.50    1.91
   2   7  11   -1.61    2.24
   2   7  12   -1.55    2.55
  -2  -7 -13   12.14    2.94
   2   7  13   12.35    3.01
   2   6 -13    3.47    2.74
   2   6 -12    6.66    2.55
   2   6 -12    7.81    2.58
   2   6 -11    7.90    2.23
   2   6 -11    9.79    2.31
   2   6 -10    4.63    1.90
   2   6 -10    3.59    1.95
   2   6  -9    2.13    1.76
  -2  -6   8    8.89    1.83
   2   6  -8    7.94    1.72
  -2  -6   7   -0.33    1.59
   2   6  -7    0.68    1.47
  -2  -6   6   35.42    2.58
   2   6  -6   39.64    2.45
  -2  -6   5    5.75    1.40
   2   6  -5    5.63    1.35
  -2  -6   4    5.05    1.32
   2   6  -4    5.47    1.24
  -2  -6   3    3.90    1.32
   2   6  -3    4.03    0.92
   2   6  -3    4.31    0.83
   2   6  -3    2.64    1.30
  -2  -6   2    4.05    1.32
   2   6  -2    3.81    0.87
   2   6  -2    4.63    1.27
   2   6  -2    5.26    0.94
  -2  -6   1    3.28    0.79
  -2  -6   1    4.55    1.27
  -2  -6   1    5.50    0.96
   2   6  -1    4.09    0.90
   2   6  -1    2.56    1.20
   2   6  -1    4.69    0.91
  -2  -6   0  135.96    4.07
  -2  -6   0  146.55    4.44
  -2  -6   0  140.38    4.11
   2   6   0  137.96    4.36
   2   6   0  144.20    4.25
   2   6   0  140.63    4.07
   2   6   0  136.84    4.09
  -2  -6  -1   16.00    1.51
  -2  -6  -1   14.23    1.36
  -2  -6  -1   12.72    1.45
   2   6   1   11.44    1.35
   2   6   1   15.56    1.34
   2   6   1   14.16    1.02
   2   6   1   13.77    1.39
  -2  -6  -2   23.39    1.62
  -2  -6  -2   24.25    1.51
  -2  -6  -2   24.19    2.17
   2   6   2   22.86    1.76
   2   6   2   22.36    1.46
   2   6   2   22.61    1.42
   2   6   2   23.08    1.74
  -2  -6  -3    6.50    1.45
  -2  -6  -3    7.19    0.94
  -2  -6  -3    7.68    1.02
   2   6   3    7.18    1.21
  -2  -6  -4   11.03    1.54
   2   6   4    9.24    1.31
   2   6   5   -1.55    1.25
  -2  -6  -6   29.38    2.21
   2   6   6   21.78    2.12
  -2  -6  -7    6.49    1.63
   2   6   7    4.23    1.46
  -2  -6  -8   27.75    2.82
   2   6   8   28.59    2.51
  -2  -6  -9    1.93    2.06
   2   6   9   -2.03    1.66
  -2  -6 -10    2.36    2.40
   2   6  10    2.72    1.91
   2   6  11   -0.23    2.13
  -2  -6 -12    7.85    2.55
  -2  -6 -13   -3.07    2.68
   2   6  13    1.80    2.66
   2   5 -13    8.57    2.81
   2   5 -12    5.15    2.43
   2   5 -11   11.37    2.15
   2   5 -10   13.33    1.91
   2   5 -10   17.52    2.03
   2   5  -9   17.54    1.83
  -2  -5   8   54.26    3.04
   2   5  -8   49.84    2.82
  -2  -5   6   19.29    1.60
   2   5  -6   18.98    2.06
  -2  -5   5   68.58    2.78
   2   5  -5   66.72    2.72
  -2  -5   4   30.64    2.05
   2   5  -4   29.75    1.94
  -2  -5   3   36.67    2.09
   2   5  -3   32.25    1.96
  -2  -5   2  178.85    5.25
   2   5  -2  173.93    5.01
   2   5  -2  174.91    5.21
   2   5  -2  192.67    5.05
  -2  -5   1  115.89    3.68
  -2  -5   1  117.28    3.40
  -2  -5   1  109.17    3.30
   2   5  -1  117.46    3.38
   2   5  -1  112.32    3.37
   2   5  -1  113.39    3.62
  -2  -5   0   97.64    2.97
  -2  -5   0   98.80    3.03
  -2  -5   0   99.51    3.32
   2   5   0   99.26    2.99
   2   5   0   98.32    3.10
   2   5   0   98.15    3.26
   2   5   0   99.29    2.98
  -2  -5  -1  126.09    3.96
  -2  -5  -1  123.89    3.68
  -2  -5  -1  125.61    3.64
   2   5   1  128.67    3.75
   2   5   1  126.20    3.89
   2   5   1  124.75    3.65
   2   5   1  122.19    3.62
  -2  -5  -2    0.44    0.78
  -2  -5  -2   -0.43    0.84
  -2  -5  -2   -0.27    1.21
   2   5   2    0.43    0.96
  -2  -5  -3   18.57    1.45
  -2  -5  -3   16.62    1.48
   2   5   3   15.46    1.66
  -2  -5  -4   76.51    2.79
   2   5   4   72.71    2.80
  -2  -5  -5   55.23    2.50
   2   5   5   52.14    2.43
  -2  -5  -6   53.01    2.60
   2   5   6   51.36    2.51
  -2  -5  -7   42.12    2.64
   2   5   7   38.04    2.40
  -2  -5  -8    4.18    1.76
   2   5   8    2.70    1.48
  -2  -5  -9    6.37    1.99
   2   5   9    6.56    1.72
  -2  -5 -10    5.00    2.29
   2   5  10    3.68    1.89
  -2  -5 -11    2.78    2.37
  -2  -5 -11    0.35    2.14
   2   5  11    2.90    2.08
  -2  -5 -12    9.34    2.43
   2   5  12   12.72    2.53
   2   5  13    5.32    2.65
   2   4 -14    4.09    4.43
   2   4 -13    4.14    2.63
   2   4 -12   -0.70    2.17
   2   4 -11    2.43    1.92
   2   4 -10    0.54    1.68
   2   4  -9    3.83    1.50
   2   4  -8   -1.61    1.72
  -2  -4   7    0.80    1.37
  -2  -4   6    4.75    1.32
   2   4  -6    6.31    1.17
  -2  -4   5    0.09    1.17
   2   4  -5    5.12    1.08
  -2  -4   4   33.96    1.95
   2   4  -4   32.94    1.83
  -2  -4   3   15.61    1.68
   2   4  -3   13.80    1.12
  -2  -4   2    4.96    1.08
   2   4  -2    2.76    1.02
   2   4  -2    5.10    0.77
   2   4  -2    3.93    0.76
  -2  -4   1   35.67    1.96
  -2  -4   1   35.86    1.58
  -2  -4   1   36.30    1.50
   2   4  -1   37.95    1.54
   2   4  -1   34.49    1.90
   2   4  -1   36.12    1.55
  -2  -4   0   69.11    2.26
  -2  -4   0   69.63    2.19
  -2  -4   0   68.11    2.56
   2   4   0   70.52    2.21
   2   4   0   66.38    2.48
   2   4   0   67.64    2.23
  -2  -4  -1   61.86    2.08
  -2  -4  -1   61.88    2.47
  -2  -4  -1   64.44    2.14
   2   4   1   62.20    2.08
   2   4   1   62.15    2.21
   2   4   1   62.48    2.04
  -2  -4  -2  116.45    3.40
  -2  -4  -2  119.47    3.72
  -2  -4  -2  117.67    3.44
   2   4   2  118.01    3.55
  -2  -4  -3   26.64    1.74
   2   4   3   23.90    1.65
  -2  -4  -4    0.83    1.11
   2   4   4    1.21    1.05
  -2  -4  -5   13.51    1.38
   2   4   5   11.36    1.32
  -2  -4  -6    2.58    1.27
   2   4   6    0.00    1.17
  -2  -4  -7    9.95    1.52
   2   4   7    8.26    1.39
  -2  -4  -8    2.80    1.60
   2   4   8   -0.54    1.42
  -2  -4  -9   14.97    2.02
   2   4   9   13.61    1.73
  -2  -4 -10    2.08    2.12
  -2  -4 -10   -0.76    1.86
   2   4  10   -0.67    1.71
  -2  -4 -11   11.82    2.52
  -2  -4 -11    7.78    2.16
   2   4  11   10.11    2.09
  -2  -4 -12    4.16    2.31
   2   4  12    3.06    2.24
  -2  -4 -13   -0.45    2.47
   2   4  13    2.69    2.62
  -2  -4 -14   -3.52    2.62
   2   3 -14    7.91    2.86
   2   3 -13    4.53    2.53
   2   3 -12   14.08    2.24
   2   3 -11    0.43    1.78
   2   3 -10   54.10    2.89
   2   3  -9    4.88    1.47
   2   3  -8  131.14    4.19
   2   3  -7    5.30    1.16
  -2  -3   5   14.95    1.72
  -2  -3   4   34.82    1.85
   2   3  -4   35.12    1.77
  -2  -3   2  148.90    4.29
   2   3  -2  148.81    4.33
  -2  -3   1   12.26    1.11
  -2  -3   1   13.24    1.07
  -2  -3   1   10.31    0.80
   2   3  -1   11.19    0.84
   2   3  -1   12.11    1.06
   2   3  -1   11.45    1.12
  -2  -3   0   14.41    1.53
  -2  -3   0   14.11    1.18
  -2  -3   0   16.38    1.13
   2   3   0   16.97    1.10
   2   3   0   12.95    1.54
   2   3   0   15.60    1.18
  -2  -3  -1   53.17    1.92
  -2  -3  -1   55.89    2.19
  -2  -3  -1   56.35    1.89
   2   3   1   53.05    1.89
   2   3   1   55.53    1.99
   2   3   1   56.13    1.82
  -2  -3  -2   25.49    1.55
  -2  -3  -2   24.96    1.29
   2   3   2   22.97    1.49
  -2  -3  -3   11.31    1.09
   2   3   3   10.62    1.05
  -2  -3  -4   75.88    2.71
   2   3   4   75.67    2.66
  -2  -3  -5   16.25    1.78
   2   3   5   14.88    1.32
  -2  -3  -6   62.88    2.64
   2   3   6   60.26    2.61
  -2  -3  -7   21.53    2.12
   2   3   7   24.36    2.04
  -2  -3  -8    6.46    1.56
  -2  -3  -8    2.45    1.51
   2   3   8    6.45    1.43
  -2  -3  -9    2.73    1.75
  -2  -3  -9    3.29    1.68
   2   3   9    2.52    1.57
  -2  -3 -10   11.70    2.19
  -2  -3 -10   13.96    1.91
   2   3  10   10.82    1.93
  -2  -3 -11    7.28    2.09
  -2  -3 -11    6.12    2.42
   2   3  11   11.16    2.03
  -2  -3 -12   16.15    2.29
   2   3  12   15.48    2.38
  -2  -3 -13   -0.06    2.35
  -2  -3 -14   -1.09    4.59
   2   2 -14   21.51    2.89
   2   2 -13    4.81    2.39
   2   2 -12   54.42    3.45
   2   2 -11    6.78    1.83
   2   2 -10   13.49    1.71
   2   2  -9   10.80    1.48
   2   2  -8   30.29    2.00
   2   2  -7    3.70    1.12
   2   2  -6  210.29    5.92
   2   2  -5   68.46    2.35
  -2  -2   2    0.83    0.79
   2   2  -2    0.02    0.82
  -2  -2   1   -0.90    0.59
  -2  -2   1   -0.55    0.60
  -2  -2   1   -1.34    0.80
   2   2  -1    0.40    0.62
   2   2  -1   -1.98    0.84
   2   2  -1    0.02    0.57
  -2  -2   0  306.43    8.19
  -2  -2   0  308.49    8.28
  -2  -2   0  307.31    8.19
   2   2   0  305.69    8.20
   2   2   0  310.25    8.19
   2   2   0  301.09    8.19
  -2  -2  -1   23.64    1.18
  -2  -2  -1   22.12    1.25
  -2  -2  -1   23.20    1.12
   2   2   1   23.55    1.09
   2   2   1   22.61    1.19
   2   2   1   22.38    1.28
  -2  -2  -2   12.01    1.27
   2   2   2    9.41    1.32
  -2  -2  -3   22.36    1.58
   2   2   3   21.00    1.47
  -2  -2  -4    1.19    1.02
   2   2   4    0.71    0.94
  -2  -2  -5   53.16    2.34
   2   2   5   54.88    2.29
  -2  -2  -6   88.19    3.14
   2   2   6   87.22    3.11
  -2  -2  -7    2.00    1.31
  -2  -2  -7    1.48    1.33
   2   2   7    2.32    1.21
  -2  -2  -8   89.03    3.37
  -2  -2  -8   87.41    3.52
   2   2   8   88.56    3.35
  -2  -2  -9   13.31    1.74
  -2  -2  -9   12.67    1.81
   2   2   9   11.56    1.69
  -2  -2 -10    7.19    1.86
  -2  -2 -10   11.97    2.12
   2   2  10    7.86    1.81
  -2  -2 -11   11.77    2.38
  -2  -2 -11   11.89    1.99
  -2  -2 -12   -1.85    3.09
  -2  -2 -12    2.12    2.02
  -2  -2 -13   -2.34    2.26
  -2  -2 -14    5.70    2.59
   2   1 -14    9.31    2.77
   2   1 -13    8.39    2.42
   2   1 -12   -1.74    1.95
   2   1 -11   -0.06    1.71
   2   1 -10    4.90    1.53
   2   1  -9   10.99    1.46
   2   1  -8   28.55    1.93
   2   1  -7    2.40    1.04
   2   1  -6    5.58    1.00
   2   1  -5   18.79    1.38
  -2  -1   1   16.97    0.95
  -2  -1   1   16.14    0.89
  -2  -1   1   13.27    1.07
   2   1  -1   16.40    0.94
   2   1  -1   18.02    0.89
   2   1  -1   14.16    1.07
  -2  -1   0   67.75    2.05
  -2  -1   0   69.03    2.04
  -2  -1   0   67.54    2.02
   2   1   0   66.31    2.02
   2   1   0   70.27    2.02
   2   1   0   66.74    2.04
  -2  -1  -1   18.31    0.97
  -2  -1  -1   17.64    1.10
  -2  -1  -1   16.81    0.99
  -2  -1  -1   16.68    1.21
   2   1   1   15.84    1.14
   2   1   1   17.02    1.12
  -2  -1  -2   14.80    1.38
  -2  -1  -2   14.22    1.25
   2   1   2   14.60    1.31
  -2  -1  -3   99.89    3.13
  -2  -1  -3  104.06    3.14
   2   1   3  100.60    3.12
  -2  -1  -4    1.37    0.93
  -2  -1  -4    0.87    0.95
   2   1   4    1.44    0.91
  -2  -1  -5    9.93    1.21
  -2  -1  -5    9.72    1.13
   2   1   5    8.41    1.15
  -2  -1  -6   33.41    2.07
  -2  -1  -6   36.30    2.13
   2   1   6   37.46    2.05
  -2  -1  -7   22.91    2.02
  -2  -1  -7   21.82    2.06
   2   1   7   24.01    1.97
  -2  -1  -8    0.37    1.33
  -2  -1  -8   -1.89    1.47
   2   1   8    2.87    1.30
  -2  -1  -9    1.01    1.45
  -2  -1  -9    3.25    1.67
  -2  -1 -10   -1.01    1.63
  -2  -1 -10   -1.33    1.89
  -2  -1 -11    9.56    1.92
  -2  -1 -11    9.60    2.41
  -2  -1 -12    3.94    2.44
  -2  -1 -12    6.55    2.08
  -2  -1 -13   23.61    2.50
  -2  -1 -13   22.87    3.19
  -2  -1 -14    0.81    2.54
  -2  -1 -14   -1.44    3.16
   2   0 -14   27.57    2.88
   2   0 -13    2.92    2.37
   2   0 -12   46.78    3.32
   2   0 -11    2.23    1.69
   2   0 -10   17.71    1.70
   2   0  -9    0.35    1.27
   2   0  -8   84.49    3.02
  -2   0   7    0.42    0.96
   2   0  -7    1.15    1.03
  -2   0   6  500.73   13.31
   2   0  -6  511.08   13.31
   2   0  -6  473.72   13.33
   2   0  -5    1.90    0.83
  -2   0   4   37.14    1.57
  -2   0   1    0.22    0.45
  -2   0   1    0.47    0.54
   2   0  -1   -0.27    0.49
   2   0  -1    0.24    0.44
   2   0  -1   -0.14    0.68
   2   0  -1    0.27    0.47
  -2   0   0  855.58   23.28
  -2   0   0  886.05   23.26
  -2   0   0  895.26   23.26
   2   0   0  866.36   23.27
   2   0   0  910.59   23.26
   2   0   0  882.95   23.26
  -2   0  -1   -0.54    0.49
  -2   0  -1   -0.17    0.61
  -2   0  -1    0.50    0.73
   2   0   1    0.12    0.63
  -2   0  -2   27.48    1.41
  -2   0  -2   30.16    1.50
   2   0   2   27.59    1.42
  -2   0  -3   -1.22    0.84
  -2   0  -3   -0.19    0.90
   2   0   3    0.19    0.86
   2   0   3    0.39    0.89
  -2   0  -4  163.19    4.68
  -2   0  -4  162.46    4.73
  -2   0  -5   -0.41    1.04
  -2   0  -5    0.19    0.96
  -2   0  -6   19.88    1.75
  -2   0  -6   18.32    1.87
  -2   0  -7   -0.59    1.22
  -2   0  -7   -1.36    1.18
  -2   0  -8  105.54    3.78
  -2   0  -8  104.39    3.63
  -2   0  -9    1.54    1.44
  -2   0  -9    1.05    1.62
  -2   0 -10   28.97    2.97
  -2   0 -10   25.08    2.50
  -2   0 -11    0.34    1.74
  -2   0 -11    0.75    2.30
  -2   0 -12    3.44    2.44
  -2   0 -12    0.94    2.03
  -2   0 -12    0.00    2.56
  -2   0 -13   -1.20    2.20
  -2   0 -14   16.78    2.63
  -2   0 -14   23.00    3.49
   2  -1 -14    7.06    2.82
   2  -1 -13    3.23    2.41
   2  -1 -12   -1.31    1.99
   2  -1 -11   -1.43    1.64
  -2   1  10    5.62    1.53
   2  -1 -10    4.44    1.47
  -2   1   9    8.31    1.43
   2  -1  -9   11.91    1.40
  -2   1   8   22.87    1.89
   2  -1  -8   30.37    1.87
  -2   1   7    1.16    1.02
   2  -1  -7   -0.44    1.05
   2  -1  -7    3.27    1.01
  -2   1   6    5.84    0.95
   2  -1  -6    7.29    0.99
   2  -1  -6    4.36    1.01
  -2   1   5   17.66    1.39
   2  -1  -5   15.47    1.37
   2  -1  -5   20.47    1.33
  -2   1   4   36.83    1.65
   2  -1  -4   40.44    1.54
   2  -1  -4   37.91    1.70
  -2   1   3   20.81    1.41
   2  -1  -3   19.79    1.43
  -2   1   2  244.88    6.70
   2  -1  -2  242.36    6.71
   2  -1  -2  252.68    6.66
  -2   1   1   17.07    0.88
  -2   1   1   16.75    1.02
  -2   1   1   14.77    1.09
  -2   1   1   16.40    0.96
   2  -1  -1   14.90    1.01
   2  -1  -1   16.93    1.08
   2  -1  -1   16.83    0.92
   2  -1  -1   15.91    0.93
  -2   1   0   65.67    1.97
  -2   1   0   66.24    2.00
  -2   1   0   65.88    2.08
   2  -1   0   65.95    1.97
   2  -1   0   66.38    2.00
   2  -1   0   65.74    2.03
   2  -1   0   69.17    2.00
  -2   1  -1   16.30    0.99
  -2   1  -1   17.84    1.20
  -2   1  -1   16.54    0.94
   2  -1   1   18.70    1.16
  -2   1  -2   16.51    1.32
   2  -1   2   15.88    1.27
  -2   1  -3  104.42    3.19
   2  -1   3  101.70    3.13
  -2   1  -4    2.53    0.90
  -2   1  -4    1.16    0.97
   2  -1   4    2.07    0.94
  -2   1  -5   10.11    1.06
  -2   1  -5    8.93    1.15
   2  -1   5   10.69    1.18
  -2   1  -6   38.25    2.15
  -2   1  -6   40.68    1.99
  -2   1  -7   23.42    1.91
  -2   1  -7   19.79    2.04
  -2   1  -8   -1.35    1.37
  -2   1  -8    1.48    1.29
  -2   1  -9    2.45    1.66
  -2   1  -9    2.91    1.48
  -2   1 -10   -0.53    2.11
  -2   1 -10    3.51    1.89
  -2   1 -10    1.92    1.60
  -2   1 -11   13.02    2.41
  -2   1 -11   11.39    2.41
  -2   1 -11   14.54    1.94
  -2   1 -12    7.21    2.08
  -2   1 -12    4.99    2.59
  -2   1 -12    7.29    2.46
  -2   1 -13   23.27    2.52
  -2   1 -13   27.13    3.22
  -2   1 -14    0.20    2.42
  -2   1 -14   -1.72    3.36
   2  -2 -15    1.59    2.35
   2  -2 -14   15.73    2.35
   2  -2 -13   -3.17    2.00
   2  -2 -13   -1.16    2.40
  -2   2  12   49.25    3.11
   2  -2 -12   39.45    3.36
  -2   2  11    7.02    1.75
   2  -2 -11    7.52    1.88
  -2   2  10   10.77    1.68
   2  -2 -10   12.18    1.68
  -2   2   9    7.88    1.41
   2  -2  -9    8.78    1.38
  -2   2   8   25.08    1.93
   2  -2  -8   26.37    1.87
   2  -2  -8   23.15    2.35
  -2   2   7    3.69    1.12
   2  -2  -7    3.68    1.04
  -2   2   6  197.78    5.61
   2  -2  -6  196.47    5.63
   2  -2  -6  199.23    5.61
  -2   2   5   65.64    2.28
  -2   2   5   63.44    2.42
   2  -2  -5   66.04    2.31
   2  -2  -5   62.05    2.24
  -2   2   4  102.90    3.12
   2  -2  -4   95.40    2.99
   2  -2  -4  102.10    3.10
  -2   2   3   -0.13    0.82
  -2   2   3   -0.21    0.91
  -2   2   2    0.81    0.85
   2  -2  -2    0.08    0.88
  -2   2   1   -1.06    0.78
  -2   2   1    0.15    0.57
  -2   2   1    0.62    0.76
  -2   2   1    0.29    0.65
   2  -2  -1    0.15    0.60
   2  -2  -1    1.28    0.83
   2  -2  -1   -1.37    0.73
   2  -2  -1    0.09    0.61
  -2   2   0  309.44    8.14
  -2   2   0  302.75    8.20
  -2   2   0  298.43    8.19
  -2   2   0  306.36    8.17
  -2   2   0  297.69    8.14
   2  -2   0  308.75    8.14
   2  -2   0  303.10    8.18
   2  -2   0  309.98    8.20
   2  -2   0  308.69    8.15
   2  -2   0  300.74    8.19
  -2   2  -1   22.35    1.20
  -2   2  -1   23.69    1.11
  -2   2  -1   19.40    1.55
  -2   2  -1   22.01    1.40
   2  -2   1   24.32    1.33
   2  -2   1   21.81    1.11
  -2   2  -2   13.08    1.35
   2  -2   2   13.55    1.28
  -2   2  -3   20.76    1.44
   2  -2   3   22.63    1.46
  -2   2  -4    1.31    0.80
   2  -2   4    2.13    0.95
  -2   2  -5   55.29    2.11
  -2   2  -5   54.64    2.33
   2  -2   5   53.80    2.23
  -2   2  -6   84.43    3.35
  -2   2  -6   78.56    3.42
  -2   2  -6   85.68    2.84
   2  -2   6   83.90    2.93
  -2   2  -7    1.43    1.59
  -2   2  -7    0.24    1.30
  -2   2  -7    3.45    1.17
  -2   2  -8   87.14    3.75
  -2   2  -8   91.44    3.54
  -2   2  -8   90.23    3.25
  -2   2  -9   13.16    1.54
  -2   2  -9   12.36    1.98
  -2   2  -9    9.92    1.80
  -2   2 -10    9.40    2.15
  -2   2 -10    8.93    1.99
  -2   2 -10   10.37    1.71
  -2   2 -11    7.57    2.42
  -2   2 -11    7.54    2.38
  -2   2 -11   13.44    1.88
  -2   2 -12    3.33    1.96
  -2   2 -12   -0.64    2.66
  -2   2 -12    0.55    2.39
  -2   2 -13   -0.34    3.09
  -2   2 -13    1.16    2.19
  -2   2 -14    2.66    3.45
  -2   2 -14    6.99    2.44
   2  -3 -14   10.75    2.41
  -2   3  13   -0.31    2.19
   2  -3 -13   -5.74    2.49
  -2   3  12    8.52    2.09
   2  -3 -12   11.12    2.24
  -2   3  11   -1.75    1.69
   2  -3 -11   -5.33    1.79
  -2   3  10   48.97    2.74
   2  -3 -10   46.33    2.80
  -2   3   9    4.13    1.40
   2  -3  -9    3.94    1.38
  -2   3   8  123.10    3.96
   2  -3  -8  121.90    3.98
  -2   3   7    5.06    1.12
   2  -3  -7    5.87    1.21
   2  -3  -7    4.18    1.14
  -2   3   6    0.45    1.04
  -2   3   6   -0.91    1.21
   2  -3  -6    0.79    1.10
   2  -3  -6    0.23    0.98
  -2   3   5   13.89    1.43
  -2   3   5   16.19    1.32
   2  -3  -5   16.92    1.49
  -2   3   4   38.20    1.71
  -2   3   4   36.03    1.81
   2  -3  -4   38.22    1.76
  -2   3   3   23.18    1.50
   2  -3  -3   21.86    1.48
  -2   3   2  158.36    4.49
   2  -3  -2  157.16    4.37
   2  -3  -2  156.28    4.36
  -2   3   1   11.50    1.04
  -2   3   1   12.91    1.27
  -2   3   1   12.04    1.17
   2  -3  -1   12.43    1.15
   2  -3  -1   10.84    0.99
   2  -3  -1   13.71    1.35
   2  -3  -1   12.12    1.10
  -2   3   0   14.66    1.08
  -2   3   0   14.91    1.11
  -2   3   0   16.51    1.43
  -2   3   0   15.15    1.22
  -2   3   0   18.26    1.27
   2  -3   0   14.55    1.14
   2  -3   0   16.94    1.19
   2  -3   0   16.63    1.34
   2  -3   0   15.31    1.33
   2  -3   0   17.08    1.38
  -2   3  -1   56.21    1.95
  -2   3  -1   51.56    2.09
  -2   3  -1   56.83    1.93
  -2   3  -1   56.72    1.86
  -2   3  -1   49.46    2.50
   2  -3   1   55.59    1.84
   2  -3   1   56.24    2.17
   2  -3   1   55.25    1.89
   2  -3   1   56.80    2.03
   2  -3   1   55.53    2.03
  -2   3  -2   23.28    1.73
   2  -3   2   26.24    1.50
  -2   3  -3   10.85    1.20
  -2   3  -3   13.26    1.31
   2  -3   3   13.52    1.39
  -2   3  -4   73.21    2.45
  -2   3  -4   73.93    2.83
   2  -3   4   75.25    2.56
  -2   3  -5   21.68    1.48
  -2   3  -5   17.60    1.61
   2  -3   5   19.26    1.64
  -2   3  -6   60.09    2.87
  -2   3  -6   61.62    2.29
   2  -3   6   60.00    2.42
  -2   3  -7   22.53    2.15
  -2   3  -7   22.57    1.82
  -2   3  -7   22.37    1.86
   2  -3   7   22.34    1.91
  -2   3  -8    3.84    1.57
  -2   3  -8    5.75    1.32
  -2   3  -8    3.46    1.72
  -2   3  -9    2.26    1.76
  -2   3  -9    5.34    1.38
  -2   3  -9    4.58    1.97
  -2   3 -10   11.66    2.38
  -2   3 -10   16.07    1.71
  -2   3 -10   15.35    2.25
  -2   3 -11    9.64    2.53
  -2   3 -11   10.83    2.45
  -2   3 -11   10.23    1.88
  -2   3 -12   20.10    3.75
  -2   3 -12   19.34    2.96
  -2   3 -12   16.21    2.16
  -2   3 -13   -1.32    3.05
  -2   3 -13    6.66    2.21
  -2   3 -14    2.31    2.30
  -2   3 -14   -2.40    4.01
  -2   4  14   -0.82    2.54
  -2   4  13    0.52    2.24
   2  -4 -13    3.12    2.48
  -2   4  12    2.42    1.99
   2  -4 -12    3.77    2.26
  -2   4  11    1.49    1.78
   2  -4 -11    4.14    1.94
  -2   4  10    0.54    1.68
   2  -4 -10    0.67    1.67
  -2   4   9    5.30    1.44
   2  -4  -9    6.41    1.44
  -2   4   8   -1.59    1.16
   2  -4  -8    1.45    1.33
   2  -4  -8    1.56    1.22
  -2   4   7   -0.82    1.36
  -2   4   7   -0.73    1.12
  -2   4   6    4.29    1.12
  -2   4   6    5.11    1.31
   2  -4  -6    7.19    1.24
  -2   4   5    5.37    1.22
  -2   4   5    2.58    1.01
   2  -4  -5    3.27    1.12
  -2   4   4   35.61    1.75
  -2   4   4   32.41    1.84
   2  -4  -4   33.08    1.80
  -2   4   3   14.20    1.53
   2  -4  -3   16.32    1.46
  -2   4   2    6.38    0.76
  -2   4   2    7.68    1.08
   2  -4  -2    6.22    0.82
   2  -4  -2    3.74    0.76
   2  -4  -2    5.40    1.03
  -2   4   1   34.70    1.58
  -2   4   1   37.38    1.74
  -2   4   1   36.12    1.51
   2  -4  -1   34.62    1.68
   2  -4  -1   34.48    1.73
   2  -4  -1   33.96    1.58
   2  -4  -1   36.79    1.73
   2  -4  -1   35.99    1.51
  -2   4   0   68.56    2.38
  -2   4   0   65.79    2.25
  -2   4   0   71.53    2.38
  -2   4   0   69.63    2.23
   2  -4   0   67.60    2.25
   2  -4   0   66.28    2.40
   2  -4   0   70.73    2.44
   2  -4   0   69.53    2.22
   2  -4   0   70.85    2.42
  -2   4  -1   63.36    2.14
  -2   4  -1   62.96    2.38
  -2   4  -1   64.55    2.10
  -2   4  -1   61.00    2.24
  -2   4  -1   64.29    2.22
   2  -4   1   61.07    2.25
   2  -4   1   61.46    2.39
   2  -4   1   63.38    2.13
   2  -4   1   63.06    2.07
   2  -4   1   62.94    2.23
  -2   4  -2  114.85    3.50
  -2   4  -2  114.31    3.63
  -2   4  -2  124.02    3.42
  -2   4  -2  119.94    3.53
   2  -4   2  114.21    3.70
   2  -4   2  117.30    3.51
  -2   4  -3   26.12    1.94
  -2   4  -3   25.40    1.62
  -2   4  -3   25.88    1.52
   2  -4   3   24.05    2.12
   2  -4   3   28.19    1.62
  -2   4  -4    1.53    0.91
  -2   4  -4    1.15    1.25
   2  -4   4    0.27    0.99
  -2   4  -5   14.20    1.55
  -2   4  -5   15.94    1.43
   2  -4   5   16.37    1.66
  -2   4  -6    1.47    1.40
  -2   4  -6    2.94    1.02
   2  -4   6   -0.56    1.09
  -2   4  -7    9.75    1.24
  -2   4  -7    9.84    1.67
   2  -4   7   10.71    1.32
  -2   4  -8    0.67    1.69
  -2   4  -8   -0.28    1.61
  -2   4  -8    1.21    1.26
  -2   4  -9   17.61    1.60
  -2   4  -9   15.33    2.18
  -2   4  -9   13.71    2.04
  -2   4 -10   -0.34    2.11
  -2   4 -10    1.32    2.16
  -2   4 -11   10.34    2.68
  -2   4 -11   10.67    2.64
  -2   4 -12    1.80    2.90
  -2   4 -13    2.23    3.09
  -2   4 -13    3.51    2.20
  -2   4 -14    1.39    4.38
  -2   5  13   14.30    2.57
  -2   5  12    4.52    2.21
   2  -5 -12    6.29    2.35
  -2   5  11   11.44    2.00
   2  -5 -11   10.26    2.11
  -2   5  10   12.40    1.80
  -2   5   9   13.88    1.59
   2  -5  -9   13.52    1.69
  -2   5   8   49.91    2.68
  -2   5   8   48.97    2.55
   2  -5  -8   51.28    2.53
  -2   5   7   21.84    2.02
   2  -5  -7   22.86    2.03
  -2   5   6   18.59    1.89
  -2   5   6   16.62    1.41
   2  -5  -6   19.26    1.85
  -2   5   5   69.68    2.71
  -2   5   5   70.39    2.66
   2  -5  -5   72.86    2.71
  -2   5   4   28.50    1.83
  -2   5   4   31.81    1.99
   2  -5  -4   33.18    1.86
  -2   5   3   36.18    1.92
   2  -5  -3   35.01    1.55
   2  -5  -3   36.81    1.68
   2  -5  -3   34.29    1.86
  -2   5   2  183.81    5.10
  -2   5   2  188.03    5.27
  -2   5   2  175.45    5.08
   2  -5  -2  183.83    5.13
   2  -5  -2  185.56    5.25
   2  -5  -2  182.15    5.10
  -2   5   1  118.22    3.43
  -2   5   1  118.74    3.59
  -2   5   1  112.30    3.53
   2  -5  -1  116.32    3.43
   2  -5  -1  119.66    3.60
   2  -5  -1  117.14    3.46
   2  -5  -1  115.01    3.56
  -2   5   0  101.89    3.16
  -2   5   0   96.01    3.16
  -2   5   0  101.22    3.00
  -2   5   0   95.40    3.00
   2  -5   0   99.22    2.98
   2  -5   0   98.59    3.20
   2  -5   0   99.40    3.04
   2  -5   0   99.21    3.18
   2  -5   0  101.42    3.18
  -2   5  -1  126.01    3.76
  -2   5  -1  124.64    3.79
  -2   5  -1  121.34    3.85
  -2   5  -1  126.13    3.66
  -2   5  -1  126.07    3.66
   2  -5   1  125.47    3.79
   2  -5   1  124.15    3.62
   2  -5   1  127.15    3.79
   2  -5   1  127.06    3.91
   2  -5   1  129.34    3.70
  -2   5  -2   -0.54    0.89
  -2   5  -2   -0.24    1.09
  -2   5  -2    0.21    0.83
  -2   5  -2   -1.05    0.80
  -2   5  -2    0.94    1.09
   2  -5   2   -0.33    0.98
   2  -5   2    0.62    1.20
  -2   5  -3   15.73    1.67
  -2   5  -3   17.42    1.48
  -2   5  -3   19.58    1.94
   2  -5   3   17.67    2.04
   2  -5   3   17.75    1.65
  -2   5  -4   75.41    2.55
  -2   5  -4   77.76    2.76
  -2   5  -4   76.19    3.01
   2  -5   4   78.69    2.68
   2  -5   4   72.09    3.18
  -2   5  -5   55.46    2.16
  -2   5  -5   54.60    2.72
   2  -5   5   54.53    2.31
  -2   5  -6   54.17    2.30
  -2   5  -6   56.34    2.91
   2  -5   6   58.00    2.38
  -2   5  -7   42.40    2.15
  -2   5  -7   41.75    2.90
  -2   5  -8    6.68    1.88
  -2   5  -9    8.22    2.15
  -2   5  -9    8.50    2.03
  -2   5 -10    5.60    2.26
  -2   5 -10    7.22    2.37
  -2   5 -11    1.03    2.56
  -2   5 -11    2.37    2.56
  -2   5 -12    9.82    2.93
  -2   5 -12   16.24    2.22
  -2   5 -13    4.12    3.20
  -2   5 -13    5.43    2.28
  -2   6  14   11.14    2.98
  -2   6  13    1.25    2.51
  -2   6  12    7.90    2.28
  -2   6  11    8.46    1.90
  -2   6  10   -0.69    1.61
  -2   6   9   -0.44    1.87
  -2   6   9    0.02    1.54
   2  -6  -9    0.33    1.68
  -2   6   8    8.36    1.74
  -2   6   8    7.43    1.48
  -2   6   7    0.84    1.53
  -2   6   7   -0.22    1.24
   2  -6  -7    1.51    1.42
  -2   6   6   42.47    2.53
  -2   6   6   40.13    2.25
   2  -6  -6   44.31    2.31
  -2   6   5    2.55    1.19
  -2   6   5    5.75    1.41
   2  -6  -5    3.65    1.32
  -2   6   4    8.44    1.37
   2  -6  -4    5.67    1.33
  -2   6   3    4.38    1.29
   2  -6  -3    1.38    0.97
   2  -6  -3    0.94    0.86
   2  -6  -3    4.95    1.24
  -2   6   2    6.20    1.27
  -2   6   2    3.69    0.88
  -2   6   2    6.58    0.91
   2  -6  -2    4.55    1.15
   2  -6  -2    5.34    1.00
   2  -6  -2    4.09    0.85
  -2   6   1    6.47    1.24
  -2   6   1    5.54    0.91
   2  -6  -1    3.95    1.23
   2  -6  -1    5.52    1.15
   2  -6  -1    5.15    1.13
   2  -6  -1    3.12    0.87
   2  -6  -1    3.36    0.96
  -2   6   0  138.42    4.13
  -2   6   0  134.82    4.25
  -2   6   0  147.60    4.13
  -2   6   0  142.03    4.28
   2  -6   0  144.70    4.17
   2  -6   0  142.59    4.34
   2  -6   0  141.42    4.11
   2  -6   0  141.78    4.28
   2  -6   0  142.24    4.30
  -2   6  -1   16.64    1.37
  -2   6  -1   12.17    1.10
  -2   6  -1   14.21    1.42
  -2   6  -1   12.95    1.30
  -2   6  -1   14.06    1.39
   2  -6   1   14.54    1.23
   2  -6   1   15.30    1.49
   2  -6   1   10.95    1.32
   2  -6   1   14.83    1.34
   2  -6   1   13.17    1.30
  -2   6  -2   24.88    1.53
  -2   6  -2   22.87    2.05
  -2   6  -2   23.44    1.65
  -2   6  -2   21.83    1.84
  -2   6  -2   24.22    1.60
   2  -6   2   24.10    2.09
   2  -6   2   27.65    1.77
  -2   6  -3    6.03    0.94
  -2   6  -3    6.82    1.34
  -2   6  -3    6.01    1.04
  -2   6  -3    7.31    1.01
  -2   6  -3    8.89    1.35
   2  -6   3    8.60    1.13
   2  -6   3    6.93    1.44
  -2   6  -4   12.08    1.51
  -2   6  -4    9.79    1.10
  -2   6  -4   11.75    1.45
   2  -6   4   10.58    1.22
   2  -6   4   10.85    1.83
  -2   6  -5   -0.81    1.31
  -2   6  -5    1.64    1.45
  -2   6  -5    0.13    0.99
   2  -6   5   -2.43    1.67
   2  -6   5    1.73    1.12
  -2   6  -6   28.76    2.55
   2  -6   6   26.12    1.99
  -2   6  -7    6.67    1.75
  -2   6  -8   32.55    3.13
  -2   6  -9    0.99    2.05
  -2   6 -10    4.60    2.39
  -2   6 -10    4.72    2.42
  -2   6 -11    2.84    2.47
  -2   6 -11    8.00    2.69
  -2   6 -12   13.39    3.15
  -2   6 -13    5.13    5.36
  -2   6 -13   -0.22    2.25
  -2   7  13   11.86    5.15
  -2   7  12    2.13    2.17
  -2   7  11    8.46    1.96
  -2   7  10    3.04    1.80
  -2   7   9   -1.50    2.01
  -2   7   9    1.11    1.56
  -2   7   8    5.64    1.62
  -2   7   8    6.21    1.94
  -2   7   7   55.82    2.72
  -2   7   7   61.18    2.95
   2  -7  -7   54.97    2.74
  -2   7   6    4.95    1.29
  -2   7   6    7.61    1.60
   2  -7  -6    5.24    1.50
  -2   7   5   32.22    2.27
  -2   7   5   27.71    2.06
   2  -7  -5   30.13    2.14
  -2   7   4    4.80    1.89
   2  -7  -4    2.55    0.97
   2  -7  -4    4.26    1.10
   2  -7  -4    4.39    1.40
  -2   7   3   10.76    1.50
   2  -7  -3    6.70    1.01
   2  -7  -3    6.79    1.31
   2  -7  -3    5.94    1.10
  -2   7   2   11.24    1.07
  -2   7   2   16.74    1.51
  -2   7   2   15.11    1.10
   2  -7  -2   11.20    1.16
   2  -7  -2   10.19    1.09
   2  -7  -2   12.50    1.49
  -2   7   1  114.21    3.58
  -2   7   1  116.66    3.75
  -2   7   1  121.60    3.57
  -2   7   1  111.61    3.74
   2  -7  -1  117.64    3.60
   2  -7  -1  113.99    3.56
   2  -7  -1  118.26    3.81
   2  -7  -1  121.20    3.77
   2  -7  -1  112.54    3.81
  -2   7   0   16.37    1.47
  -2   7   0   16.18    1.51
  -2   7   0   14.12    1.39
   2  -7   0   15.88    1.45
   2  -7   0   17.33    1.41
   2  -7   0   12.46    1.43
   2  -7   0   16.63    1.47
   2  -7   0   16.71    1.65
  -2   7  -1  108.96    3.51
  -2   7  -1  105.11    3.36
  -2   7  -1  108.13    3.33
  -2   7  -1  104.93    3.62
   2  -7   1  109.17    3.49
   2  -7   1  103.51    3.53
   2  -7   1  104.87    3.29
   2  -7   1  105.71    3.62
   2  -7   1  106.37    3.34
  -2   7  -2   42.74    2.40
  -2   7  -2   45.26    2.04
  -2   7  -2   41.57    1.98
  -2   7  -2   42.89    2.27
  -2   7  -2   41.68    2.05
   2  -7   2   45.26    2.49
   2  -7   2   46.60    2.16
  -2   7  -3   14.88    1.22
  -2   7  -3   13.90    1.17
  -2   7  -3   17.46    1.59
  -2   7  -3   12.82    1.25
  -2   7  -3   14.85    1.51
   2  -7   3   15.16    1.63
   2  -7   3   17.26    1.77
  -2   7  -4   -0.79    1.36
  -2   7  -4    0.29    1.08
  -2   7  -4   -1.29    1.60
   2  -7   4    1.14    1.16
   2  -7   4    0.75    1.52
  -2   7  -5   42.87    2.20
  -2   7  -5   45.93    2.87
  -2   7  -5   44.14    2.75
   2  -7   5   44.89    2.23
   2  -7   5   47.49    2.96
  -2   7  -6   10.92    1.77
  -2   7  -7   75.44    3.66
  -2   7  -8   17.76    2.28
  -2   7  -9    6.26    2.31
  -2   7 -10    3.95    2.49
  -2   7 -10    8.85    2.62
  -2   7 -11   -1.10    2.80
  -2   7 -12    5.04    3.13
  -2   7 -13   11.73    3.41
  -2   8  13    1.80    2.77
  -2   8  12   15.47    2.52
  -2   8  11   11.80    2.11
  -2   8  10   -1.46    1.92
   2  -8 -10    2.59    2.06
  -2   8   9    7.18    1.75
  -2   8   9    5.58    2.37
  -2   8   8   31.86    3.02
  -2   8   8   34.66    2.64
  -2   8   7    9.15    1.62
  -2   8   7   10.77    1.95
   2  -8  -7    8.52    1.71
  -2   8   6   67.72    2.96
  -2   8   6   69.50    3.20
   2  -8  -6   67.71    3.03
  -2   8   5    2.84    1.32
  -2   8   5    4.34    1.61
   2  -8  -5    2.92    1.20
   2  -8  -5    2.21    1.09
   2  -8  -5    2.60    1.38
  -2   8   4   -1.55    1.48
   2  -8  -4    0.71    1.03
   2  -8  -4    1.07    1.12
   2  -8  -4    1.98    1.37
  -2   8   3    7.38    1.51
  -2   8   3    4.31    1.01
   2  -8  -3    3.43    1.41
   2  -8  -3    3.62    1.07
   2  -8  -3    4.60    1.15
  -2   8   2   -0.66    1.37
  -2   8   2    0.72    1.04
  -2   8   2    0.12    1.18
  -2   8   2    0.58    0.95
   2  -8  -2    0.18    1.40
   2  -8  -2   -0.86    0.96
   2  -8  -2    1.87    1.12
  -2   8   1   47.71    2.42
  -2   8   1   48.21    2.39
  -2   8   1   45.96    2.09
  -2   8   1   44.46    2.54
   2  -8  -1   49.46    2.19
   2  -8  -1   46.10    2.41
   2  -8  -1   48.14    2.06
   2  -8  -1   47.73    2.53
  -2   8   0   16.91    1.96
  -2   8   0   18.52    1.64
  -2   8   0   17.47    1.88
   2  -8   0   18.28    1.59
   2  -8   0   16.94    1.58
   2  -8   0   19.40    2.01
   2  -8   0   14.59    1.51
   2  -8   0   19.20    1.60
  -2   8  -1   20.78    1.94
  -2   8  -1   23.97    2.08
  -2   8  -1   22.29    1.71
   2  -8   1   21.66    1.81
   2  -8   1   23.32    1.98
   2  -8   1   18.05    1.91
   2  -8   1   21.51    1.56
  -2   8  -2   35.54    2.35
  -2   8  -2   31.59    1.93
  -2   8  -2   33.95    1.98
  -2   8  -2   34.04    2.24
   2  -8   2   32.21    2.45
   2  -8   2   30.03    1.70
   2  -8   2   33.19    2.08
   2  -8   2   34.54    1.96
  -2   8  -3   12.64    1.58
  -2   8  -3   13.56    1.60
  -2   8  -3    9.97    1.18
  -2   8  -3   12.40    1.25
  -2   8  -3   11.84    1.34
   2  -8   3   14.62    1.70
   2  -8   3   13.26    1.34
  -2   8  -4    9.44    1.56
  -2   8  -4    9.28    1.67
  -2   8  -4    9.53    1.34
  -2   8  -4    8.06    1.28
  -2   8  -4    8.32    1.18
   2  -8   4    9.24    1.34
   2  -8   4    8.73    1.77
  -2   8  -5   13.52    1.46
  -2   8  -5   17.37    1.87
  -2   8  -5   14.66    1.79
   2  -8   5   19.39    1.99
  -2   8  -6   14.09    1.88
   2  -8   6   12.32    2.21
  -2   8  -7   10.76    2.04
  -2   8  -7    7.14    1.98
  -2   8  -8   15.58    2.27
  -2   8  -9   10.74    2.36
  -2   8 -10   -1.78    2.53
  -2   8 -11    6.74    2.81
  -2   8 -12    5.83    3.19
  -2   9  13    4.03    2.77
  -2   9  12   -3.15    2.79
  -2   9  11    2.57    2.18
  -2   9  10    0.13    1.94
  -2   9   9    1.35    2.46
  -2   9   9    4.22    1.95
  -2   9   8    8.58    1.79
  -2   9   8    4.60    2.39
   2  -9  -8    8.27    2.02
  -2   9   7   15.71    1.80
  -2   9   7   22.33    2.33
   2  -9  -7   16.45    1.91
  -2   9   6   -0.47    1.95
  -2   9   6   -0.05    1.51
   2  -9  -6   -0.68    1.60
  -2   9   5    0.09    1.70
  -2   9   5    0.83    1.39
   2  -9  -5    0.21    1.23
   2  -9  -5    2.01    1.30
   2  -9  -5   -1.75    1.54
  -2   9   4   20.96    1.94
   2  -9  -4   20.36    2.03
   2  -9  -4   17.86    1.79
   2  -9  -4   19.08    1.84
  -2   9   3    0.58    1.51
  -2   9   3    1.17    1.01
   2  -9  -3   -1.21    1.49
   2  -9  -3   -0.04    1.06
   2  -9  -3    1.98    1.26
  -2   9   2   15.70    1.51
  -2   9   2   17.64    1.70
  -2   9   2   18.58    1.68
  -2   9   2   16.75    1.29
   2  -9  -2   17.35    1.41
   2  -9  -2   12.99    1.66
   2  -9  -2   12.41    1.22
   2  -9  -2   13.66    1.63
  -2   9   1   34.66    2.04
  -2   9   1   35.56    2.33
  -2   9   1   37.94    2.04
  -2   9   1   37.33    2.39
   2  -9  -1   36.65    2.13
   2  -9  -1   39.14    2.57
   2  -9  -1   34.49    2.28
   2  -9  -1   33.66    2.00
   2  -9  -1   44.68    2.42
  -2   9   0   -0.71    1.03
  -2   9   0    1.57    1.08
  -2   9   0    0.67    1.32
  -2   9   0    0.19    1.43
   2  -9   0    0.20    1.42
   2  -9   0    0.05    1.50
   2  -9   0   -0.56    1.21
   2  -9   0   -0.33    1.03
   2  -9   0    0.24    1.39
  -2   9  -1   18.72    2.09
  -2   9  -1   20.44    2.25
  -2   9  -1   21.01    1.80
   2  -9   1   21.97    2.40
   2  -9   1   22.18    1.67
   2  -9   1   16.50    1.65
   2  -9   1   20.28    1.91
   2  -9   1   25.19    2.10
  -2   9  -2   26.35    2.25
  -2   9  -2   26.33    2.32
  -2   9  -2   24.90    2.00
   2  -9   2   20.94    1.99
   2  -9   2   25.35    2.49
   2  -9   2   25.43    1.99
  -2   9  -3    1.84    1.24
  -2   9  -3    2.46    1.57
  -2   9  -3    1.84    1.62
  -2   9  -3   -0.54    1.12
   2  -9   3    2.75    1.67
  -2   9  -4   -0.73    1.31
  -2   9  -4    2.09    1.36
  -2   9  -4    2.92    1.73
  -2   9  -4    2.71    1.62
  -2   9  -4    2.35    1.26
   2  -9   4    2.34    1.89
   2  -9   4    3.35    1.67
  -2   9  -5    8.89    1.31
  -2   9  -5   11.05    1.86
  -2   9  -5    8.20    1.93
  -2   9  -5    7.41    1.52
   2  -9   5    6.35    1.55
   2  -9   5   10.08    2.09
  -2   9  -6   -1.12    1.82
  -2   9  -6    2.18    2.05
   2  -9   6    3.86    2.29
  -2   9  -7   13.91    2.23
  -2   9  -7   19.86    2.41
  -2   9  -8    7.60    2.27
  -2   9  -9    2.40    2.47
  -2   9 -10   -0.25    2.63
  -2   9 -12    1.32    3.23
  -2  10  12    2.21    2.60
   2 -10 -11    6.95    2.52
  -2  10  10    1.16    2.06
  -2  10   9   14.73    2.90
  -2  10   9   16.61    2.20
   2 -10  -9   15.09    2.35
  -2  10   8   -2.73    2.50
  -2  10   8    3.77    1.83
   2 -10  -8    2.96    2.09
  -2  10   7    9.26    1.70
  -2  10   7   13.06    2.47
   2 -10  -7   10.55    2.02
   2 -10  -7   12.23    1.73
   2 -10  -7   10.33    1.54
  -2  10   6    8.09    2.21
  -2  10   6    3.55    1.67
   2 -10  -6    4.03    1.85
   2 -10  -6    4.71    1.38
   2 -10  -6    3.20    1.57
  -2  10   5   22.88    2.20
  -2  10   5   21.29    2.37
   2 -10  -5   23.89    2.37
   2 -10  -5   17.71    1.55
   2 -10  -5   18.66    2.05
  -2  10   4    8.18    1.98
   2 -10  -4   11.44    1.82
   2 -10  -4    6.95    1.27
   2 -10  -4    6.51    1.52
   2 -10  -4   11.59    1.85
  -2  10   3   31.82    2.46
  -2  10   3   30.90    1.95
  -2  10   3   28.82    2.61
  -2  10   3   29.55    2.04
   2 -10  -3   27.83    2.43
   2 -10  -3   29.60    2.06
   2 -10  -3   32.07    2.68
   2 -10  -3   31.24    2.34
  -2  10   2   -0.77    1.45
  -2  10   2    0.60    1.14
  -2  10   2    0.01    1.15
  -2  10   2    2.90    1.67
   2 -10  -2    1.82    1.55
   2 -10  -2    1.57    1.61
   2 -10  -2    2.17    1.63
   2 -10  -2    2.56    1.22
   2 -10  -2    1.49    1.38
  -2  10   1   34.65    2.50
  -2  10   1   33.35    2.04
  -2  10   1   32.89    2.14
  -2  10   1   33.68    2.50
   2 -10  -1   31.32    2.38
   2 -10  -1   35.13    2.55
   2 -10  -1   33.63    2.28
   2 -10  -1   35.19    2.69
   2 -10  -1   34.86    2.08
  -2  10   0    3.15    1.56
  -2  10   0    2.05    1.18
  -2  10   0    1.00    1.62
  -2  10   0    2.60    1.26
   2 -10   0    0.70    1.06
   2 -10   0    1.37    1.71
   2 -10   0   -0.53    1.54
   2 -10   0   -0.17    1.55
   2 -10   0    2.03    1.37
  -2  10  -1   -0.18    1.60
  -2  10  -1   -0.72    1.42
  -2  10  -1    0.61    1.25
  -2  10  -1    2.26    1.21
   2 -10   1    0.58    1.29
   2 -10   1    1.96    1.50
   2 -10   1   -0.81    1.71
   2 -10   1    0.77    1.09
  -2  10  -2    8.57    1.79
  -2  10  -2    6.95    1.60
  -2  10  -2    6.80    1.38
   2 -10   2    4.78    1.50
   2 -10   2    5.35    1.11
   2 -10   2    8.20    1.85
  -2  10  -3   20.76    1.71
  -2  10  -3   24.40    2.64
  -2  10  -3   24.30    2.60
   2 -10   3   19.09    2.16
   2 -10   3   20.14    1.74
  -2  10  -4   -0.40    1.29
  -2  10  -4    1.22    1.78
  -2  10  -4    1.37    1.51
  -2  10  -4    1.90    1.92
   2 -10   4    1.13    2.06
   2 -10   4    0.28    1.50
  -2  10  -5   20.83    2.12
  -2  10  -5   18.65    1.82
  -2  10  -5   22.90    2.25
  -2  10  -5   22.00    2.33
   2 -10   5   20.57    2.46
   2 -10   5   18.61    1.83
  -2  10  -6   -0.93    1.95
  -2  10  -6    2.65    2.29
   2 -10   6    0.81    2.47
  -2  10  -7    5.79    2.24
  -2  10  -7    8.15    2.48
   2 -10   7    5.42    2.86
  -2  10  -8    3.22    2.74
  -2  10  -8    2.14    2.30
  -2  10  -9    9.67    2.78
  -2  10  -9   14.55    3.03
  -2  10 -11    7.10    3.25
  -2  11  11    0.98    2.58
  -2  11  10    6.05    2.75
   2 -11 -10    3.08    2.57
  -2  11   9    3.15    3.18
  -2  11   9   -1.67    2.05
   2 -11  -9    0.61    2.31
  -2  11   8   14.84    2.11
  -2  11   8   15.19    2.91
   2 -11  -8   10.45    1.81
   2 -11  -8   13.21    2.39
  -2  11   7    4.02    1.82
  -2  11   7    1.15    2.65
   2 -11  -7    3.58    1.92
   2 -11  -7    0.53    1.51
   2 -11  -7    0.69    2.19
  -2  11   6   -0.09    2.40
  -2  11   6    2.54    1.73
   2 -11  -6    1.50    1.82
   2 -11  -6    1.91    2.02
   2 -11  -6   -0.56    1.40
  -2  11   5    3.33    2.23
  -2  11   5    1.63    1.67
   2 -11  -5    1.58    1.46
   2 -11  -5    2.93    1.73
   2 -11  -5    1.63    1.97
  -2  11   4   18.39    1.94
  -2  11   4   19.21    2.39
   2 -11  -4   19.86    2.18
   2 -11  -4   16.46    2.04
   2 -11  -4   22.04    1.88
   2 -11  -4   17.55    1.66
  -2  11   3    2.02    2.01
  -2  11   3    1.24    1.66
  -2  11   3    0.15    1.22
  -2  11   3    2.48    1.32
   2 -11  -3    1.41    1.38
   2 -11  -3    3.09    1.89
   2 -11  -3    2.34    1.60
   2 -11  -3    2.58    1.69
  -2  11   2   18.46    2.08
  -2  11   2   17.63    1.58
  -2  11   2   25.59    2.07
  -2  11   2   23.85    2.67
   2 -11  -2   18.72    1.92
   2 -11  -2   28.56    2.82
   2 -11  -2   24.73    2.16
   2 -11  -2   21.25    1.78
   2 -11  -2   14.79    1.56
  -2  11   1    1.19    1.83
  -2  11   1   -1.12    1.60
  -2  11   1   -0.40    1.23
  -2  11   1    2.51    1.36
   2 -11  -1    1.23    1.73
   2 -11  -1   -1.41    1.20
   2 -11  -1    1.58    1.86
   2 -11  -1    0.20    1.65
   2 -11  -1    0.69    1.47
  -2  11   0   -1.06    1.79
  -2  11   0    1.07    1.69
  -2  11   0    2.29    1.37
  -2  11   0   -0.85    1.27
   2 -11   0   -2.27    1.89
   2 -11   0    1.69    1.26
   2 -11   0    1.22    1.54
   2 -11   0   -0.27    1.69
   2 -11   0   -0.57    1.58
  -2  11  -1    2.50    1.76
  -2  11  -1    0.00    1.30
  -2  11  -1    0.72    1.39
  -2  11  -1   -1.57    1.83
   2 -11   1    1.01    1.23
   2 -11   1    2.60    1.71
   2 -11   1    1.08    1.47
   2 -11   1   -1.08    1.94
  -2  11  -2   20.12    1.99
  -2  11  -2   24.93    2.20
  -2  11  -2   21.58    1.78
  -2  11  -2   21.90    2.19
   2 -11   2   20.17    1.76
   2 -11   2   15.80    1.43
   2 -11   2   20.25    1.92
   2 -11   2   19.22    2.27
  -2  11  -3    4.48    2.11
  -2  11  -3    3.40    1.61
  -2  11  -3    2.84    1.79
   2 -11   3    1.82    1.64
   2 -11   3    2.87    2.16
  -2  11  -4   13.31    1.87
  -2  11  -4    8.78    2.34
  -2  11  -4   12.14    2.04
   2 -11   4    8.10    1.75
   2 -11   4   10.38    2.33
  -2  11  -5    1.62    1.85
  -2  11  -5    3.00    2.31
  -2  11  -5    1.99    1.92
   2 -11   5   -0.39    2.51
   2 -11   5    0.57    1.74
  -2  11  -6    4.93    1.58
  -2  11  -6    7.36    2.60
  -2  11  -6    4.64    2.16
  -2  11  -6    2.06    1.94
   2 -11   6    8.09    2.83
  -2  11  -7    4.49    2.74
  -2  11  -7    1.10    2.35
   2 -11   7   -0.09    2.90
  -2  11  -8    8.02    3.07
  -2  11  -8   -4.88    2.43
  -2  11  -9    4.97    3.25
  -2  11  -9    2.65    4.48
  -2  11 -10    8.08    3.04
  -2  11 -11    1.40    3.20
  -2  12  11    5.16    2.69
   2 -12 -11    1.87    3.09
  -2  12  10    1.48    2.51
  -2  12   9    4.73    3.57
   2 -12  -9    7.13    2.65
  -2  12   8   -4.72    3.02
  -2  12   8   -2.38    1.98
   2 -12  -8   -0.91    2.13
   2 -12  -8   -1.16    1.84
   2 -12  -8    1.10    2.33
  -2  12   7    1.41    2.94
  -2  12   7    5.64    2.01
   2 -12  -7    4.25    1.81
   2 -12  -7    0.26    2.31
   2 -12  -7    2.58    2.18
  -2  12   6    2.72    1.85
  -2  12   6    6.36    2.72
   2 -12  -6    1.38    1.71
   2 -12  -6   -1.62    2.14
   2 -12  -6    0.65    2.06
  -2  12   5   -0.80    1.66
  -2  12   5   -1.57    2.44
   2 -12  -5   -4.47    1.94
   2 -12  -5   -0.04    1.64
   2 -12  -5    3.19    2.15
  -2  12   4   -2.12    1.86
  -2  12   4   -2.00    2.38
   2 -12  -4    0.49    1.87
   2 -12  -4   -0.07    1.52
   2 -12  -4   -0.04    1.92
  -2  12   3    2.28    2.27
  -2  12   3    6.64    2.01
  -2  12   3    5.23    1.41
  -2  12   3    3.12    1.51
   2 -12  -3    9.42    2.25
   2 -12  -3    6.41    1.86
   2 -12  -3    4.94    1.92
   2 -12  -3    1.72    1.42
   2 -12  -3    4.12    2.22
  -2  12   2    2.27    1.39
  -2  12   2    1.90    1.87
  -2  12   2    0.14    1.46
  -2  12   2    1.36    2.17
   2 -12  -2   -0.17    1.78
   2 -12  -2    2.49    1.38
   2 -12  -2   -0.38    2.16
   2 -12  -2    4.79    2.00
   2 -12  -2    0.05    1.91
  -2  12   1    2.76    1.38
  -2  12   1    6.70    1.58
  -2  12   1    3.82    1.90
  -2  12   1    6.55    2.15
   2 -12  -1    0.95    1.76
   2 -12  -1    5.83    1.99
   2 -12  -1    1.55    1.85
   2 -12  -1    4.34    2.14
   2 -12  -1    5.66    1.44
  -2  12   0    6.06    1.90
  -2  12   0    5.37    2.15
  -2  12   0    2.81    1.61
  -2  12   0    4.59    1.39
   2 -12   0    2.86    1.39
   2 -12   0    3.44    1.76
   2 -12   0    2.48    2.20
   2 -12   0    7.09    2.03
  -2  12  -1    2.80    1.45
  -2  12  -1   -1.21    2.11
  -2  12  -1    0.64    1.64
  -2  12  -1    1.76    2.03
   2 -12   1   -0.28    2.23
   2 -12   1    3.99    1.95
   2 -12   1   -2.03    1.62
   2 -12   1    1.40    1.39
  -2  12  -2    1.95    1.69
  -2  12  -2    1.63    1.45
  -2  12  -2   -1.65    1.90
  -2  12  -2   -0.75    2.20
   2 -12   2    1.59    1.35
   2 -12   2   -0.35    2.24
   2 -12   2    0.30    1.88
   2 -12   2    0.13    1.69
  -2  12  -3   11.72    1.87
  -2  12  -3    9.48    2.36
  -2  12  -3   10.01    1.65
  -2  12  -3   12.03    2.11
   2 -12   3   11.56    1.97
   2 -12   3    8.80    2.53
  -2  12  -4    2.05    1.93
  -2  12  -4   -1.16    2.50
  -2  12  -4    0.99    2.01
   2 -12   4   -2.10    1.85
   2 -12   4    1.21    2.58
  -2  12  -5    4.73    2.67
  -2  12  -5    3.35    2.14
  -2  12  -5    5.35    2.17
   2 -12   5    2.58    2.81
  -2  12  -6    4.50    2.30
  -2  12  -6    5.66    2.88
  -2  12  -6    4.16    2.34
   2 -12   6    4.46    2.80
  -2  12  -7   -0.64    2.42
  -2  12  -7    0.91    2.98
  -2  12  -7   -1.94    2.33
  -2  12  -8   11.95    3.11
  -2  12  -8    7.76    2.50
  -2  12  -9    6.53    2.97
  -2  12 -10    5.22    3.17
  -2  13  10   -2.15    2.48
  -2  13   9   -2.63    2.34
   2 -13  -9    2.55    2.87
   2 -13  -9    0.16    2.19
  -2  13   8   -1.16    2.51
   2 -13  -8    1.49    2.67
   2 -13  -8    0.29    2.04
  -2  13   7    8.73    2.25
  -2  13   7    4.61    3.62
   2 -13  -7    5.50    2.01
   2 -13  -7   10.29    2.56
  -2  13   6   -4.07    2.72
  -2  13   6    1.09    2.07
   2 -13  -6   -0.95    2.25
   2 -13  -6    1.94    1.85
   2 -13  -6    3.53    3.00
  -2  13   5    6.68    2.75
  -2  13   5    5.84    1.94
   2 -13  -5    5.08    2.06
   2 -13  -5    3.27    1.75
   2 -13  -5    5.34    2.57
   2 -13  -5    6.85    2.25
  -2  13   4   -2.02    2.67
  -2  13   4    5.12    2.24
   2 -13  -4    1.25    2.48
   2 -13  -4    0.06    2.12
   2 -13  -4   -0.13    1.66
   2 -13  -4    2.54    2.07
  -2  13   3    5.03    2.54
  -2  13   3    3.27    1.73
  -2  13   3    7.12    1.54
  -2  13   3    7.14    2.19
   2 -13  -3   10.15    2.54
   2 -13  -3    9.37    2.14
   2 -13  -3    2.52    2.04
   2 -13  -3    6.54    2.53
   2 -13  -3    3.50    1.60
  -2  13   2   -1.53    2.11
  -2  13   2    2.67    1.45
  -2  13   2    5.87    1.74
  -2  13   2   -2.45    2.41
   2 -13  -2    2.43    2.33
   2 -13  -2   -1.69    2.42
   2 -13  -2    3.16    1.57
   2 -13  -2    2.66    1.98
   2 -13  -2    3.77    1.99
  -2  13   1    0.34    2.38
  -2  13   1   -2.83    1.46
  -2  13   1    1.53    1.74
  -2  13   1    0.02    2.09
   2 -13  -1    2.23    2.03
   2 -13  -1    0.13    1.82
   2 -13  -1    1.16    2.49
   2 -13  -1    1.50    1.47
   2 -13  -1    1.17    2.28
  -2  13   0   -0.38    1.47
  -2  13   0    2.85    2.38
  -2  13   0    0.92    1.78
  -2  13   0   -0.64    2.04
   2 -13   0    1.52    2.53
   2 -13   0    0.67    1.51
   2 -13   0    3.55    2.31
   2 -13   0   -0.92    2.01
  -2  13  -1    7.27    2.43
  -2  13  -1    8.64    1.61
  -2  13  -1   10.20    2.17
  -2  13  -1   10.02    1.92
   2 -13   1    7.78    1.54
   2 -13   1    4.64    1.99
   2 -13   1    7.61    2.60
   2 -13   1   13.28    2.27
  -2  13  -2    1.38    2.48
  -2  13  -2   -0.38    1.57
  -2  13  -2   -0.22    1.89
  -2  13  -2   -0.18    2.18
   2 -13   2    1.89    2.11
   2 -13   2    3.03    2.63
   2 -13   2   -1.51    1.50
   2 -13   2   -1.89    1.94
  -2  13  -3   -0.08    2.55
  -2  13  -3    2.55    1.69
  -2  13  -3    4.09    2.12
  -2  13  -3    7.84    2.02
   2 -13   3    0.55    2.75
   2 -13   3    5.38    2.11
  -2  13  -4    2.11    1.77
  -2  13  -4    2.81    2.02
  -2  13  -4    5.96    2.24
  -2  13  -4    1.18    2.75
   2 -13   4    6.69    2.72
   2 -13   4    4.53    2.13
  -2  13  -5    1.59    2.82
  -2  13  -5    0.57    1.76
  -2  13  -5   -2.33    2.31
  -2  13  -5   -0.23    2.15
  -2  13  -6    1.34    2.48
  -2  13  -6    0.70    3.54
  -2  13  -7    8.54    3.38
  -2  13  -8   -0.79    2.81
  -2  13  -9    0.73    3.06
  -2  14   9   -1.03    2.51
   2 -14  -9    3.37    3.13
   2 -14  -9    2.80    2.33
  -2  14   8   -3.39    2.33
   2 -14  -8    3.16    2.96
  -2  14   7    0.45    2.28
   2 -14  -7   -2.85    2.71
   2 -14  -7    4.42    3.07
   2 -14  -6    6.02    2.10
   2 -14  -6   10.75    2.63
  -2  14   5   -1.19    2.04
   2 -14  -5   -2.24    2.43
   2 -14  -5    0.30    1.85
  -2  14   4    2.64    2.49
  -2  14   4    2.64    1.66
   2 -14  -4    2.93    2.47
   2 -14  -4    3.63    1.86
   2 -14  -4    2.32    2.83
  -2  14   3   -4.43    3.19
  -2  14   3    1.22    1.62
  -2  14   3   -1.91    2.35
  -2  14   3    1.09    1.93
   2 -14  -3    0.78    2.17
   2 -14  -3    4.74    2.60
   2 -14  -3    0.56    2.80
   2 -14  -3    0.67    1.78
  -2  14   2    3.46    2.34
  -2  14   2    1.43    1.63
  -2  14   2   -1.00    1.94
  -2  14   2   -4.70    2.51
   2 -14  -2    1.60    2.63
   2 -14  -2   -0.03    1.70
   2 -14  -2    0.28    2.07
   2 -14  -2   -0.84    2.76
   2 -14  -2   -1.87    2.06
  -2  14   1   -1.05    1.65
  -2  14   1   -0.84    1.95
  -2  14   1   -0.83    2.41
  -2  14   1   -1.75    2.31
   2 -14  -1   -2.84    2.12
   2 -14  -1    2.82    2.97
   2 -14  -1   -1.10    1.69
   2 -14  -1    0.84    2.64
  -2  14   0   10.67    2.46
  -2  14   0   12.43    2.03
  -2  14   0   12.97    1.78
  -2  14   0   13.95    2.61
   2 -14   0   17.43    2.67
   2 -14   0    8.30    1.83
   2 -14   0   12.87    2.39
   2 -14   0   13.85    3.06
  -2  14  -1    2.60    2.59
  -2  14  -1    0.37    1.91
  -2  14  -1    2.66    2.33
  -2  14  -1    4.12    1.63
   2 -14   1    4.50    2.18
   2 -14   1    5.61    2.90
   2 -14   1    0.06    1.64
   2 -14   1    1.15    2.43
  -2  14  -2    7.83    2.54
  -2  14  -2    9.57    1.84
  -2  14  -2    6.78    3.23
   2 -14   2   10.40    1.75
   2 -14   2   11.49    2.34
   2 -14   2    8.17    2.81
   2 -14   2    9.88    2.53
  -2  14  -3   -1.31    2.55
  -2  14  -3   -1.05    1.72
   2 -14   3   -0.48    2.36
  -2  14  -4    3.11    1.86
  -2  14  -4    2.13    2.47
   2 -14   4   -2.34    2.35
  -2  14  -5   -0.21    4.26
  -2  14  -5    2.09    1.97
   2 -14   5    5.99    2.56
  -2  14  -6    9.91    2.19
  -2  14  -6   10.98    2.98
  -2  14  -7    1.75    2.89
  -2  14  -8    5.49    2.52
  -2  14  -8    5.66    3.23
  -2  15   7    5.87    2.37
   2 -15  -7    2.08    2.34
   2 -15  -7    8.94    2.90
  -2  15   6    0.38    2.36
   2 -15  -6   -1.49    2.24
   2 -15  -6   -1.80    2.70
  -2  15   5    2.71    2.28
   2 -15  -5    3.12    3.20
   2 -15  -5    3.36    2.18
  -2  15   4    1.65    2.76
   2 -15  -4    3.15    2.74
   2 -15  -4    2.11    4.33
   2 -15  -4   -3.27    3.20
  -2  15   3   -1.11    1.80
  -2  15   3    2.70    2.00
  -2  15   3    0.18    2.66
   2 -15  -3   -1.43    2.42
   2 -15  -3    1.66    3.01
   2 -15  -3   -4.67    3.02
  -2  15   2    2.43    2.31
  -2  15   2    1.99    1.81
  -2  15   2    0.19    2.56
   2 -15  -2   -1.67    3.10
   2 -15  -2   -1.99    1.88
  -2  15   1   10.39    2.79
  -2  15   1    2.02    1.85
   2 -15  -1    7.29    1.99
   2 -15  -1   11.16    2.86
   2 -15  -1   10.27    3.21
  -2  15   0   -0.80    1.82
  -2  15   0   -4.38    2.57
   2 -15   0    5.61    2.88
   2 -15   0   -3.29    1.86
  -2  15  -1    9.35    2.80
  -2  15  -1    8.10    1.88
   2 -15   1    7.19    2.01
   2 -15   1    4.10    2.34
   2 -15   1    8.68    2.90
  -2  15  -2    3.77    2.73
  -2  15  -2    1.75    2.23
   2 -15   2    1.20    2.44
   2 -15   2    6.64    2.76
   2 -15   2    3.65    1.88
  -2  15  -3   -2.08    4.73
   2 -15   3    2.30    2.77
  -2  15  -4    1.51    2.90
  -2  15  -4   -0.73    2.13
   2 -15   4   -4.80    2.73
  -2  15  -5    1.94    2.91
  -2  15  -5    1.88    2.17
  -2  15  -6   -1.37    2.81
  -2  15  -6    2.07    2.18
  -2  15  -7    4.29    2.29
  -2  15  -7   -0.36    3.04
  -2  16   6    3.11    2.63
   2 -16  -6    3.93    3.01
   2 -16  -6   -2.78    2.28
  -2  16   5    2.21    2.41
   2 -16  -5    2.27    2.32
   2 -16  -5    5.85    2.81
  -2  16   4    5.98    3.16
   2 -16  -4    0.86    2.75
   2 -16  -4    2.89    2.32
  -2  16   3   10.44    3.15
   2 -16  -3    9.68    2.32
  -2  16   2    0.51    3.00
  -2  16   2    2.90    2.39
   2 -16  -2    4.17    2.25
  -2  16   1    9.96    3.06
  -2  16   1    4.37    2.10
   2 -16  -1    5.43    2.28
  -2  16   0    7.44    4.66
  -2  16   0    3.95    2.03
   2 -16   0    7.57    2.23
  -2  16  -1    3.74    2.03
  -2  16  -1   -0.93    3.73
   2 -16   1    5.88    4.31
  -2  16  -2    3.40    2.01
  -2  16  -2    2.74    3.02
   2 -16   2    2.01    2.13
   2 -16   2   -2.50    2.89
  -2  16  -3   -1.12    3.14
  -2  16  -3    1.96    2.04
   2 -16   3    0.87    2.99
  -2  16  -4   -0.95    2.08
  -2  16  -4    1.55    3.29
   2 -16   4   -0.84    3.11
  -2  16  -5    7.05    2.22
  -2  16  -5    0.22    3.37
   2 -16   5    4.64    3.32
  -2  17   3    0.93    3.52
  -2  17   3   -0.78    2.27
   2 -17  -3   -0.29    2.30
  -2  17   2    5.80    3.62
  -2  17   2    3.48    2.24
   2 -17  -2   -0.17    2.50
  -2  17   1    2.08    2.16
  -2  17   1    6.65    3.42
   2 -17  -1    0.93    2.35
  -2  17   0    1.48    2.16
  -2  17   0    4.75    3.52
   2 -17   0   -0.43    2.22
  -2  17  -1   -1.54    2.10
  -2  17  -1    4.16    3.36
   2 -17   1   -3.45    2.38
  -2  17  -2   -0.03    2.21
  -2  17  -2   -2.01    3.42
  -3 -17   2    4.67    2.43
   3  17  -2   10.47    3.14
   3  17  -2    1.93    2.17
  -3 -17   1    7.47    3.76
  -3 -17   1   -0.09    2.47
   3  17  -1   -1.82    2.18
   3  17  -1    1.98    3.21
  -3 -17   0    2.32    2.41
   3  17   0    1.12    2.20
   3  17   0   -0.74    3.25
  -3 -17  -1    2.16    2.43
   3  17   1    1.38    2.25
   3  17   1    2.73    2.48
   3  17   1   -6.95    3.38
   3  16  -5    3.78    3.11
   3  16  -5    1.85    2.08
   3  16  -4    2.08    2.86
   3  16  -4    1.05    1.96
  -3 -16   3    5.54    2.18
   3  16  -3   10.73    2.88
   3  16  -3    7.07    2.12
   3  16  -2    1.54    3.05
   3  16  -2   -0.46    1.89
  -3 -16   1    6.97    2.25
   3  16  -1    7.72    2.06
   3  16  -1    9.92    3.03
  -3 -16   0    8.99    3.51
  -3 -16   0   -1.48    2.09
   3  16   0    0.33    1.94
   3  16   0    4.33    3.01
  -3 -16  -1   -3.16    2.12
   3  16   1    2.78    2.92
   3  16   1    0.71    2.06
  -3 -16  -2    1.53    2.19
   3  16   2    0.16    2.05
   3  16   2    2.33    2.35
  -3 -16  -3    2.34    2.24
  -3 -16  -4    0.76    2.32
   3  16   4   -1.92    2.34
   3  15  -7    5.11    2.11
   3  15  -7    8.90    3.10
   3  15  -6    1.89    2.77
   3  15  -6   -1.44    1.99
   3  15  -5    7.85    2.08
   3  15  -5    8.55    2.81
   3  15  -4    0.63    2.22
   3  15  -4    5.37    2.78
   3  15  -3   -1.81    4.38
  -3 -15   2   -7.84    2.46
  -3 -15   2   -1.45    1.91
   3  15  -2    1.31    3.03
   3  15  -2    1.53    4.63
  -3 -15   1    7.35    2.85
  -3 -15   1    8.51    2.23
   3  15  -1    6.53    1.93
   3  15  -1    7.50    2.63
  -3 -15   0   -2.68    1.87
   3  15   0    1.84    2.66
   3  15   0   -2.36    1.81
  -3 -15  -1    6.79    2.32
   3  15   1   10.58    2.84
   3  15   1   10.43    1.97
  -3 -15  -2   -5.53    3.19
   3  15   2    4.12    1.88
   3  15   2    0.85    2.23
  -3 -15  -3    3.55    2.17
   3  15   3    1.77    2.08
   3  15   3    5.52    1.92
  -3 -15  -4   -1.35    2.17
   3  15   4   -1.99    2.25
  -3 -15  -5    2.98    2.28
   3  15   5    0.18    2.35
  -3 -15  -6    2.49    2.33
   3  15   6    0.55    2.32
   3  14  -9    0.25    3.09
   3  14  -8    1.15    3.02
   3  14  -7   -2.44    2.05
   3  14  -7    1.43    2.81
   3  14  -6    9.06    1.93
   3  14  -5    1.20    2.55
   3  14  -5   -0.09    1.74
   3  14  -4    2.12    1.82
   3  14  -4    8.01    2.52
  -3 -14   3    0.47    2.34
   3  14  -3   -1.83    1.66
   3  14  -3   -3.16    2.33
  -3 -14   2    6.17    2.50
  -3 -14   2   -2.61    1.65
   3  14  -2    0.62    1.62
   3  14  -2   -1.70    3.26
   3  14  -2   -1.85    2.31
  -3 -14   1   -4.37    3.37
  -3 -14   1    0.15    1.62
  -3 -14   1    0.02    2.44
   3  14  -1   -0.35    1.95
   3  14  -1   -0.41    2.65
   3  14  -1    0.06    2.22
   3  14  -1   -1.04    1.56
  -3 -14   0   11.15    3.17
  -3 -14   0   18.81    2.37
  -3 -14   0   15.45    1.89
   3  14   0   11.94    2.06
   3  14   0   13.12    2.97
   3  14   0   13.26    1.82
   3  14   0   12.34    2.52
  -3 -14  -1    2.19    3.06
  -3 -14  -1    0.75    1.70
   3  14   1    3.63    1.97
   3  14   1    2.87    2.84
   3  14   1    3.15    1.68
   3  14   1   -0.95    2.34
  -3 -14  -2   15.08    3.82
  -3 -14  -2    8.49    1.93
   3  14   2   11.73    2.96
   3  14   2    8.67    2.15
   3  14   2    9.73    2.10
   3  14   2    6.62    1.69
  -3 -14  -3   -3.48    1.86
   3  14   3   -3.06    2.07
   3  14   3   -1.04    2.99
   3  14   3    3.25    2.12
   3  14   3    1.49    1.66
  -3 -14  -4    3.81    1.98
   3  14   4   -4.27    2.99
   3  14   4    0.44    2.03
  -3 -14  -5   -1.49    2.97
  -3 -14  -6    4.35    2.58
   3  14   6    2.11    3.41
   3  14   6    7.62    2.38
  -3 -14  -7   -0.75    2.19
   3  14   7   -1.70    2.21
   3  14   7   -4.82    3.49
   3  14   8    7.69    2.53
   3  13 -10    2.95    3.30
   3  13  -9   -1.77    1.98
   3  13  -9    2.98    3.01
   3  13  -8    1.79    1.86
   3  13  -7    9.32    2.68
   3  13  -7    7.35    1.83
   3  13  -6   -0.12    2.69
   3  13  -6    1.88    1.72
   3  13  -6    3.39    2.44
  -3 -13   5    1.79    2.70
   3  13  -5    2.12    1.71
   3  13  -5    5.72    4.53
   3  13  -5    2.82    2.31
   3  13  -5    4.66    2.11
  -3 -13   4   -0.97    2.62
   3  13  -4   -1.87    1.52
   3  13  -4    3.65    2.76
   3  13  -4    0.29    2.19
   3  13  -4   -0.63    2.00
  -3 -13   3   -3.20    2.06
  -3 -13   3    7.42    2.83
  -3 -13   3   -0.25    1.44
   3  13  -3    2.86    1.55
   3  13  -3    1.93    3.04
   3  13  -3    1.60    2.09
   3  13  -3   -1.07    1.98
  -3 -13   2    4.79    2.22
  -3 -13   2    5.52    2.78
  -3 -13   2    5.49    1.59
   3  13  -2    3.25    2.00
   3  13  -2    9.71    2.77
   3  13  -2    6.23    2.13
   3  13  -2    7.47    1.59
  -3 -13   1    1.24    1.48
  -3 -13   1    1.28    2.80
  -3 -13   1   -1.09    2.09
   3  13  -1    6.98    2.66
   3  13  -1    2.91    2.17
   3  13  -1    2.85    1.46
   3  13  -1    6.32    1.93
  -3 -13   0    7.15    2.81
  -3 -13   0    2.01    1.53
   3  13   0    3.28    2.11
   3  13   0    4.92    1.52
   3  13   0    9.04    1.93
   3  13   0    4.15    2.60
  -3 -13  -1    4.29    2.85
  -3 -13  -1    7.93    1.62
   3  13   1    9.58    2.17
   3  13   1    7.51    1.85
   3  13   1    8.55    1.58
   3  13   1    8.58    2.62
  -3 -13  -2    1.78    2.14
  -3 -13  -2   -0.82    1.62
  -3 -13  -2    4.18    2.83
   3  13   2    5.97    1.81
   3  13   2   -0.10    1.44
   3  13   2   -1.92    1.79
   3  13   2    4.19    2.50
  -3 -13  -3    3.42    2.06
  -3 -13  -3    1.44    2.99
  -3 -13  -3    1.62    1.68
   3  13   3    5.63    2.64
   3  13   3    1.41    1.77
   3  13   3    4.65    1.96
  -3 -13  -4    4.78    3.15
  -3 -13  -4    4.68    2.55
  -3 -13  -4    6.75    1.82
   3  13   4    7.52    2.70
   3  13   4    3.02    1.99
  -3 -13  -5   -0.18    1.85
  -3 -13  -5    0.91    3.14
   3  13   5   -1.11    2.03
   3  13   5    1.70    2.88
  -3 -13  -6   -6.18    4.09
  -3 -13  -6    3.28    1.99
   3  13   6   -3.52    2.09
  -3 -13  -7    9.52    2.16
   3  13   7    6.60    2.34
  -3 -13  -8    2.19    3.37
   3  13   8    1.92    2.32
  -3 -13  -9    1.17    2.42
   3  13   9   -0.97    2.54
   3  12 -11    3.25    3.18
   3  12 -10    5.56    3.80
   3  12  -9   -0.97    2.83
   3  12  -8   -0.32    1.75
   3  12  -8    2.95    2.63
   3  12  -8    1.12    2.27
  -3 -12   7   -0.14    2.66
   3  12  -7    0.19    2.39
   3  12  -7   -0.60    2.22
   3  12  -7    1.67    1.59
  -3 -12   6    0.29    2.76
   3  12  -6    1.15    2.21
   3  12  -6    5.02    2.06
   3  12  -6    3.19    1.64
   3  12  -6    4.49    2.64
  -3 -12   5    0.81    2.61
   3  12  -5    2.92    1.98
   3  12  -5   -1.34    1.51
   3  12  -5    0.76    2.05
   3  12  -5   -2.46    2.70
  -3 -12   4    5.37    2.63
   3  12  -4   -0.30    1.97
   3  12  -4    4.43    1.88
   3  12  -4    1.46    1.45
   3  12  -4    2.27    2.65
  -3 -12   3    2.69    2.53
   3  12  -3    0.92    1.79
   3  12  -3    7.36    2.53
   3  12  -3    2.56    1.44
   3  12  -3    1.72    2.04
  -3 -12   2    0.33    2.45
  -3 -12   2    1.15    1.39
  -3 -12   2   -0.87    1.86
   3  12  -2    0.02    1.70
   3  12  -2    3.62    2.50
   3  12  -2   -1.76    1.83
   3  12  -2    1.34    1.43
  -3 -12   1    0.64    2.41
  -3 -12   1   -0.92    1.26
   3  12  -1    2.22    2.36
   3  12  -1   -2.23    1.93
   3  12  -1   -1.71    1.32
   3  12  -1    1.35    1.65
  -3 -12   0    2.52    1.37
  -3 -12   0    7.38    2.47
   3  12   0    4.98    1.65
   3  12   0    4.49    2.29
   3  12   0    5.02    1.41
   3  12   0    4.49    1.92
  -3 -12  -1   -1.30    1.36
  -3 -12  -1    2.47    2.39
  -3 -12  -1    2.72    1.84
   3  12   1    0.71    2.28
   3  12   1    1.24    1.36
   3  12   1   -0.37    1.57
   3  12   1   -0.60    1.95
  -3 -12  -2    4.02    2.51
  -3 -12  -2    4.59    1.86
  -3 -12  -2    4.64    1.59
   3  12   2    2.17    1.44
   3  12   2    2.66    1.75
   3  12   2    4.97    2.28
   3  12   2    2.43    1.57
  -3 -12  -3    1.22    2.72
  -3 -12  -3    1.61    1.94
  -3 -12  -3    3.85    1.58
   3  12   3    4.36    1.39
   3  12   3    2.58    2.26
   3  12   3    6.92    1.58
   3  12   3   -0.69    1.75
  -3 -12  -4    1.31    2.06
  -3 -12  -4    3.64    1.61
  -3 -12  -4    3.14    2.74
   3  12   4    1.46    1.78
  -3 -12  -5    5.86    2.91
  -3 -12  -5    1.53    1.71
  -3 -12  -5   -0.93    2.12
   3  12   5    2.26    1.90
  -3 -12  -6    2.29    1.77
  -3 -12  -6    5.10    3.14
  -3 -12  -6   -0.63    2.07
   3  12   6   -0.76    1.93
  -3 -12  -7   -0.89    1.82
  -3 -12  -7    4.83    3.12
   3  12   7    6.07    2.20
  -3 -12  -8    5.84    2.00
   3  12   8    2.18    2.31
  -3 -12  -9   -0.28    2.10
   3  12   9    0.97    2.41
   3  12  10    4.57    2.45
   3  11 -10    7.04    2.77
  -3 -11   9   -4.06    2.97
   3  11  -9    1.38    2.61
  -3 -11   8   24.86    3.19
   3  11  -8   29.46    2.81
  -3 -11   7    3.32    2.60
   3  11  -7    4.25    2.22
   3  11  -7    0.52    1.95
  -3 -11   6    0.58    2.48
   3  11  -6    5.60    1.80
   3  11  -6   -0.40    2.03
   3  11  -6    3.93    1.51
  -3 -11   5    1.76    2.29
   3  11  -5    0.81    1.66
   3  11  -5   -0.85    1.92
   3  11  -5    6.27    2.38
   3  11  -5    0.73    1.41
  -3 -11   4   11.83    2.38
   3  11  -4    7.98    1.44
   3  11  -4   13.14    2.37
   3  11  -4    6.99    1.66
   3  11  -4   11.32    1.97
  -3 -11   3    0.56    1.21
  -3 -11   3   -0.88    2.12
   3  11  -3    2.63    2.20
   3  11  -3    1.12    1.52
   3  11  -3    0.66    1.30
   3  11  -3    1.31    1.81
  -3 -11   2   28.13    2.61
  -3 -11   2   25.78    2.13
  -3 -11   2   28.05    2.56
   3  11  -2   27.78    2.86
   3  11  -2   27.25    2.19
   3  11  -2   25.18    2.43
   3  11  -2   32.63    3.04
  -3 -11   1   -0.61    2.05
  -3 -11   1   -1.06    1.16
   3  11  -1   -1.13    1.79
   3  11  -1    1.80    2.05
   3  11  -1   -1.49    1.43
   3  11  -1    1.51    1.27
  -3 -11   0    0.20    1.23
  -3 -11   0   -1.24    2.16
  -3 -11   0    0.11    1.54
   3  11   0    1.93    1.97
   3  11   0    4.78    1.44
   3  11   0    2.19    1.31
   3  11   0    0.22    1.68
  -3 -11  -1   -2.12    1.54
  -3 -11  -1    0.78    2.13
  -3 -11  -1    0.42    1.33
   3  11   1    1.85    1.40
   3  11   1    0.11    1.24
   3  11   1    1.58    1.94
   3  11   1    0.01    1.78
  -3 -11  -2    3.77    2.30
  -3 -11  -2    1.24    1.66
  -3 -11  -2    4.08    1.39
   3  11   2    7.08    1.63
   3  11   2    5.67    1.29
   3  11   2    6.51    2.01
   3  11   2    4.73    1.41
  -3 -11  -3   -0.11    2.32
  -3 -11  -3   -0.14    1.40
  -3 -11  -3    0.55    1.66
   3  11   3   -2.08    2.01
   3  11   3    0.26    1.64
  -3 -11  -4   13.21    1.89
  -3 -11  -4   12.83    2.52
  -3 -11  -4   13.82    1.63
   3  11   4   12.76    1.81
  -3 -11  -5    1.10    2.50
  -3 -11  -5    0.71    1.56
  -3 -11  -5    0.90    1.88
   3  11   5    1.29    1.68
  -3 -11  -6   15.21    1.78
  -3 -11  -6   11.06    2.15
  -3 -11  -6   15.42    2.95
   3  11   6   12.75    2.01
  -3 -11  -7    1.84    1.63
  -3 -11  -7    1.21    2.24
  -3 -11  -7    0.23    3.04
   3  11   7    1.79    2.03
  -3 -11  -8   10.38    3.35
   3  11   8    0.46    2.18
  -3 -11  -9   10.64    3.53
   3  11   9   -0.30    2.23
   3  11  10    5.60    2.35
   3  10 -12    0.31    3.51
   3  10 -12   -0.78    3.40
   3  10 -11    9.14    2.66
  -3 -10  10    1.84    3.00
   3  10 -10    1.07    2.41
  -3 -10   9    3.67    2.93
   3  10  -9    5.17    2.34
  -3 -10   8    3.17    2.57
   3  10  -8    5.59    2.23
  -3 -10   7    3.14    2.28
   3  10  -7    2.72    2.11
  -3 -10   6   -4.10    2.12
   3  10  -6   -0.15    1.86
   3  10  -6   -1.09    1.33
  -3 -10   5   13.11    2.19
   3  10  -5   15.72    1.46
   3  10  -5   17.56    1.72
   3  10  -5   15.36    2.01
  -3 -10   4    5.03    2.00
   3  10  -4    2.06    1.68
   3  10  -4    2.29    1.28
   3  10  -4    4.02    1.42
  -3 -10   3   29.08    3.02
   3  10  -3   31.40    2.26
   3  10  -3   31.20    2.76
   3  10  -3   26.14    2.71
   3  10  -3   24.89    2.06
  -3 -10   2    6.55    1.96
  -3 -10   2    8.08    1.17
   3  10  -2    6.38    1.72
   3  10  -2    9.39    1.40
   3  10  -2    8.87    2.00
   3  10  -2    6.90    1.29
  -3 -10   1   -0.04    1.01
  -3 -10   1    2.07    1.90
   3  10  -1    1.06    1.28
   3  10  -1    4.38    1.83
   3  10  -1    1.72    1.14
   3  10  -1    2.30    1.63
  -3 -10   0    2.31    1.81
  -3 -10   0    3.85    1.38
  -3 -10   0    3.08    1.12
   3  10   0    4.07    1.56
   3  10   0    5.87    1.31
   3  10   0    7.44    1.80
   3  10   0    4.09    1.19
  -3 -10  -1    3.20    1.21
  -3 -10  -1    4.38    1.45
  -3 -10  -1   -0.33    2.00
   3  10   1   -0.02    1.52
   3  10   1    1.34    1.72
   3  10   1    2.50    1.13
   3  10   1    2.35    1.26
  -3 -10  -2   -0.36    1.99
  -3 -10  -2    0.57    1.27
  -3 -10  -2    1.68    1.44
   3  10   2   -1.07    1.11
   3  10   2    2.43    1.46
   3  10   2   -0.76    1.73
   3  10   2    2.25    1.22
  -3 -10  -3   17.17    1.55
  -3 -10  -3   22.57    2.33
  -3 -10  -3   21.51    1.74
   3  10   3   22.17    2.45
   3  10   3   23.96    2.36
  -3 -10  -4    3.36    2.16
  -3 -10  -4    1.96    1.59
  -3 -10  -4    1.49    1.33
   3  10   4    2.74    1.55
  -3 -10  -5   10.40    2.40
  -3 -10  -5   10.93    1.76
  -3 -10  -5    9.10    1.46
   3  10   5    6.83    1.74
  -3 -10  -6   -1.70    1.44
  -3 -10  -6    0.70    1.76
  -3 -10  -6    1.00    2.43
   3  10   6    0.39    1.73
  -3 -10  -7    0.01    2.68
   3  10   7   -1.21    1.76
  -3 -10  -8    4.74    3.01
   3  10   8    2.93    2.08
  -3 -10  -9   19.01    3.57
   3  10   9   15.47    2.42
  -3 -10 -10    8.69    3.59
   3  10  10    0.20    2.29
   3  10  11    1.32    2.48
   3   9 -13   11.33    3.49
   3   9 -12    7.38    2.90
   3   9 -12    4.96    2.86
   3   9 -11   13.60    2.76
  -3  -9  10   15.63    3.06
   3   9 -10   16.68    2.53
  -3  -9   9   -0.20    2.62
   3   9  -9    1.09    2.04
  -3  -9   8   47.62    3.84
   3   9  -8   43.01    3.29
  -3  -9   7    9.71    2.14
   3   9  -7   12.24    1.98
  -3  -9   6    1.78    1.97
   3   9  -6    5.13    1.29
   3   9  -6    4.45    1.81
   3   9  -6    4.48    1.49
  -3  -9   5   11.96    1.94
   3   9  -5   12.68    1.79
   3   9  -5   10.98    1.32
   3   9  -5   13.81    1.51
  -3  -9   4   17.00    1.92
   3   9  -4   13.32    1.74
   3   9  -4   13.59    1.36
   3   9  -4   15.88    1.48
  -3  -9   3   -2.28    1.65
   3   9  -3    0.77    1.10
   3   9  -3   -0.35    1.19
   3   9  -3    0.96    1.47
  -3  -9   2   78.61    2.85
  -3  -9   2   82.39    3.57
   3   9  -2   82.70    2.98
   3   9  -2   89.00    3.35
   3   9  -2   87.05    3.02
   3   9  -2   79.80    3.46
  -3  -9   1    3.16    1.21
  -3  -9   1    0.48    1.69
  -3  -9   1    3.96    0.98
   3   9  -1    8.08    1.65
   3   9  -1    4.32    1.13
   3   9  -1    3.21    1.55
   3   9  -1    7.06    1.18
  -3  -9   0   18.66    1.67
  -3  -9   0   18.03    1.96
  -3  -9   0   17.73    1.45
   3   9   0   21.41    1.83
   3   9   0   15.50    1.65
   3   9   0   19.46    1.78
   3   9   0   19.32    1.77
  -3  -9  -1   12.72    1.85
  -3  -9  -1    9.61    1.34
  -3  -9  -1    9.25    1.23
   3   9   1    9.18    1.57
   3   9   1    9.87    1.22
   3   9   1   13.45    1.68
   3   9   1    9.74    1.14
  -3  -9  -2    2.46    1.15
  -3  -9  -2    3.38    1.30
  -3  -9  -2    7.19    1.80
   3   9   2    2.75    1.10
   3   9   2    0.32    0.99
   3   9   2    3.41    1.60
   3   9   2    1.95    1.34
  -3  -9  -3    2.00    1.16
  -3  -9  -3    7.01    1.37
  -3  -9  -3    3.92    1.82
   3   9   3    6.52    1.38
  -3  -9  -4   12.43    2.08
  -3  -9  -4   10.23    1.35
  -3  -9  -4   10.56    1.48
   3   9   4   11.02    1.61
  -3  -9  -5    0.89    1.47
  -3  -9  -5    2.40    2.04
  -3  -9  -5    3.54    1.26
   3   9   5    1.15    1.50
  -3  -9  -6    9.86    1.65
  -3  -9  -6    8.47    1.45
  -3  -9  -6    8.33    2.32
   3   9   6    7.34    1.82
  -3  -9  -7    9.78    2.57
   3   9   7    6.78    1.81
  -3  -9  -8    6.01    2.71
   3   9   8   -0.80    1.74
  -3  -9  -9    9.66    3.15
   3   9   9    4.21    1.94
  -3  -9 -10    6.93    3.56
  -3  -9 -11   15.05    5.46
   3   9  11    4.14    2.52
  -3  -9 -12    3.36    2.85
   3   9  12    6.34    2.78
   3   8 -13   -1.94    2.80
   3   8 -12    4.43    2.70
   3   8 -11    0.85    2.37
   3   8 -11    5.80    2.42
  -3  -8  10    2.28    2.67
   3   8 -10    0.31    2.21
  -3  -8   9    3.90    2.35
   3   8  -9    1.26    2.03
  -3  -8   8   25.91    2.44
   3   8  -8   27.70    2.92
  -3  -8   7    3.27    1.84
   3   8  -7    4.53    1.66
  -3  -8   6   42.71    3.02
   3   8  -6   44.45    2.88
  -3  -8   5    9.17    1.70
   3   8  -5    7.83    1.60
   3   8  -5    8.28    1.24
  -3  -8   4    6.07    1.61
   3   8  -4    3.58    1.16
   3   8  -4    3.18    1.07
   3   8  -4    2.97    1.46
  -3  -8   3   -0.37    1.52
   3   8  -3    0.01    1.36
   3   8  -3    1.40    1.04
   3   8  -3   -0.69    1.09
  -3  -8   2   -0.17    0.90
  -3  -8   2    2.59    1.52
   3   8  -2   -0.38    1.40
   3   8  -2    0.19    1.05
   3   8  -2    1.64    1.01
  -3  -8   1    1.98    1.11
  -3  -8   1   -0.17    1.46
  -3  -8   1   -0.51    0.92
   3   8  -1    1.04    1.02
   3   8  -1   -0.07    1.42
   3   8  -1   -0.93    1.37
   3   8  -1   -0.50    0.98
  -3  -8   0   54.25    2.86
  -3  -8   0   50.05    2.27
  -3  -8   0   44.39    2.04
   3   8   0   50.39    2.61
   3   8   0   49.73    2.15
   3   8   0   46.36    2.12
  -3  -8  -1    1.45    1.15
  -3  -8  -1    2.93    1.04
  -3  -8  -1    5.07    1.59
   3   8   1    0.45    0.97
   3   8   1    3.36    1.45
   3   8   1    3.21    1.04
   3   8   1    0.92    1.33
  -3  -8  -2   27.64    1.95
  -3  -8  -2   30.86    2.53
  -3  -8  -2   26.89    1.84
   3   8   2   29.02    1.75
   3   8   2   27.38    2.10
  -3  -8  -3   19.32    1.76
  -3  -8  -3   17.74    1.88
  -3  -8  -3   16.72    1.38
   3   8   3   14.82    1.50
  -3  -8  -4    1.67    1.10
  -3  -8  -4   -0.14    1.71
  -3  -8  -4   -0.76    1.21
   3   8   4    0.47    1.33
  -3  -8  -5    1.95    1.85
   3   8   5    0.93    1.43
  -3  -8  -6   18.17    2.23
   3   8   6   14.53    1.72
  -3  -8  -7    4.66    2.26
   3   8   7    1.56    1.76
  -3  -8  -8    5.32    2.58
   3   8   8   10.52    1.83
  -3  -8  -9   14.39    2.95
   3   8   9   14.77    2.07
  -3  -8 -10    2.73    3.12
   3   8  10    3.48    2.06
  -3  -8 -11    1.36    3.39
   3   8  11    0.07    2.41
  -3  -8 -12    7.17    2.73
   3   8  12    4.07    2.74
   3   7 -13   23.96    3.21
   3   7 -12   -3.59    2.42
   3   7 -11   17.82    2.46
   3   7 -11   12.86    2.29
  -3  -7  10    1.44    2.50
   3   7 -10    1.86    1.93
   3   7 -10    1.46    2.04
  -3  -7   9    5.30    2.16
  -3  -7   8    5.53    1.99
   3   7  -8    6.79    1.70
  -3  -7   7   44.92    2.92
   3   7  -7   42.65    2.71
  -3  -7   6    9.56    1.66
   3   7  -6   11.20    1.55
  -3  -7   5   51.39    2.72
   3   7  -5   49.23    2.72
  -3  -7   4    1.20    1.46
   3   7  -4    0.30    0.96
   3   7  -4   -0.73    1.36
   3   7  -3   10.63    1.77
   3   7  -3   10.54    1.47
   3   7  -3   12.12    1.11
  -3  -7   2    0.50    0.99
  -3  -7   2    1.28    0.82
  -3  -7   2    0.78    1.45
   3   7  -2    2.04    1.16
   3   7  -2   -1.18    1.34
   3   7  -2    0.11    0.96
  -3  -7   1   12.44    1.59
  -3  -7   1    9.29    1.02
  -3  -7   1   12.37    1.15
   3   7  -1   10.51    1.08
   3   7  -1    8.59    1.45
   3   7  -1   12.46    1.09
  -3  -7   0   -0.35    1.43
  -3  -7   0    0.56    1.03
  -3  -7   0    0.01    0.89
   3   7   0   -0.49    0.93
   3   7   0   -0.58    0.93
   3   7   0   -0.61    1.29
   3   7   0    0.66    1.30
  -3  -7  -1   50.40    4.38
  -3  -7  -1   66.35    2.41
   3   7   1   64.41    2.59
   3   7   1   66.94    2.36
   3   7   1   63.98    2.83
   3   7   1   66.18    2.39
   3   7   1   66.85    2.55
  -3  -7  -2   -2.89    1.61
  -3  -7  -2   -1.48    1.02
  -3  -7  -2   -1.35    1.06
   3   7   2   -0.40    1.14
   3   7   2   -0.28    0.88
  -3  -7  -3    5.98    1.58
  -3  -7  -3    6.49    1.15
  -3  -7  -3    6.56    1.06
   3   7   3    6.77    1.28
  -3  -7  -4    0.18    1.03
  -3  -7  -4   -0.12    1.12
  -3  -7  -4    1.22    1.55
   3   7   4    0.91    1.28
  -3  -7  -5    0.64    1.73
   3   7   5    0.00    1.40
  -3  -7  -6    3.76    1.87
   3   7   6    0.74    1.46
  -3  -7  -7   35.99    3.29
   3   7   7   32.86    2.61
  -3  -7  -8    3.82    2.05
   3   7   8    3.69    1.70
  -3  -7  -9    9.73    2.38
   3   7   9    4.75    1.81
   3   7  10    2.99    2.13
  -3  -7 -11   -2.02    2.37
   3   7  11   -2.54    4.33
  -3  -7 -12    2.06    2.68
   3   7  12    2.45    2.59
   3   6 -14    3.25    3.44
   3   6 -13    6.50    2.68
   3   6 -12   17.01    2.56
   3   6 -11   -0.52    2.03
   3   6 -10    0.96    1.80
   3   6  -9   26.07    2.12
   3   6  -8    1.75    1.57
  -3  -6   7   63.95    3.08
   3   6  -7   60.01    2.89
   3   6  -6   41.11    2.38
  -3  -6   5    1.40    1.32
   3   6  -5    0.83    1.28
  -3  -6   4   22.80    2.12
   3   6  -4   20.62    2.08
  -3  -6   3   38.48    2.34
   3   6  -3   44.37    1.90
   3   6  -3   37.64    2.27
   3   6  -3   38.48    1.80
  -3  -6   2    1.94    0.80
  -3  -6   2    2.50    1.29
  -3  -6   2    1.70    0.95
   3   6  -2    2.76    0.93
   3   6  -2    0.76    1.27
   3   6  -2    2.56    0.91
  -3  -6   1   82.03    3.14
  -3  -6   1   75.93    2.59
  -3  -6   1   79.03    2.67
   3   6  -1   80.25    2.62
   3   6  -1   74.93    3.04
   3   6  -1   74.97    2.63
  -3  -6   0  159.32    4.72
  -3  -6   0  168.46    5.07
  -3  -6   0  169.18    4.80
   3   6   0  165.81    5.04
   3   6   0  164.16    4.77
   3   6   0  169.90    4.76
  -3  -6  -1   29.42    1.73
  -3  -6  -1   26.46    2.28
  -3  -6  -1   28.83    1.63
   3   6   1   29.75    1.83
   3   6   1   30.75    1.74
   3   6   1   30.41    1.65
   3   6   1   29.03    1.58
  -3  -6  -2  112.62    3.49
  -3  -6  -2  114.69    3.91
  -3  -6  -2  111.80    3.46
   3   6   2  110.21    3.58
  -3  -6  -3    5.84    1.00
  -3  -6  -3    5.82    1.49
  -3  -6  -3    5.73    1.06
   3   6   3    5.22    1.20
  -3  -6  -4    2.96    1.54
  -3  -6  -4    3.10    1.08
   3   6   4    3.75    1.26
  -3  -6  -5   24.29    2.17
   3   6   5   25.69    2.09
  -3  -6  -6   45.03    2.73
   3   6   6   43.90    2.57
  -3  -6  -7   14.58    1.85
   3   6   7    8.95    1.55
  -3  -6  -8   28.70    3.05
   3   6   8   24.16    2.53
  -3  -6  -9    1.05    2.23
   3   6   9    2.31    1.82
  -3  -6 -10    3.44    2.24
  -3  -6 -10    0.89    2.36
   3   6  10    2.72    2.03
  -3  -6 -11    9.77    2.39
   3   6  11    5.92    2.19
  -3  -6 -12    7.04    3.70
   3   6  12    5.58    2.42
  -3  -6 -13   -1.13    2.78
   3   6  13    0.83    2.82
   3   5 -14    1.94    2.63
   3   5 -13    7.32    2.63
   3   5 -12   -0.62    2.17
   3   5 -11   11.61    2.06
   3   5 -10    2.15    1.64
   3   5  -9   34.81    2.49
  -3  -5   8   -0.13    1.59
  -3  -5   7   16.42    1.64
   3   5  -7   18.22    2.11
  -3  -5   6    0.48    1.26
   3   5  -6    4.51    1.25
  -3  -5   5    7.37    1.31
   3   5  -5    6.46    1.19
  -3  -5   4    3.89    1.26
   3   5  -4    2.84    1.15
  -3  -5   3    4.81    1.22
   3   5  -3    4.70    0.88
   3   5  -3    2.38    1.11
  -3  -5   2   19.50    1.27
  -3  -5   2   21.28    1.46
  -3  -5   2   17.81    1.91
   3   5  -2   18.24    1.79
   3   5  -2   19.95    1.37
   3   5  -2   22.78    1.47
  -3  -5   1   84.84    3.04
  -3  -5   1   82.22    2.60
  -3  -5   1   85.38    2.69
   3   5  -1   80.25    2.65
   3   5  -1   85.12    2.67
   3   5  -1   79.45    2.96
  -3  -5   0    8.82    1.33
  -3  -5   0    9.84    0.91
  -3  -5   0    9.46    0.98
   3   5   0    7.70    0.88
   3   5   0    6.05    1.15
   3   5   0    9.25    0.90
  -3  -5  -1    9.01    0.91
  -3  -5  -1   12.56    1.05
  -3  -5  -1   12.49    1.41
   3   5   1   12.17    0.97
   3   5   1   14.16    1.41
   3   5   1   12.91    0.96
   3   5   1   14.15    1.19
  -3  -5  -2   26.83    1.49
  -3  -5  -2   28.64    1.63
  -3  -5  -2   23.98    2.14
   3   5   2   24.65    1.65
  -3  -5  -3    6.15    1.39
  -3  -5  -3    7.41    1.00
  -3  -5  -3    5.03    0.87
  -3  -5  -3    9.46    1.22
   3   5   3    6.66    1.16
  -3  -5  -4   -0.92    1.25
   3   5   4    0.08    1.12
  -3  -5  -5    3.73    1.33
   3   5   5    0.93    1.19
  -3  -5  -6    8.48    1.50
   3   5   6    4.37    1.31
  -3  -5  -7   42.50    2.74
   3   5   7   38.06    2.50
  -3  -5  -8    8.33    1.90
   3   5   8    6.72    1.66
  -3  -5  -9    5.90    1.88
  -3  -5  -9    5.45    2.14
   3   5   9    5.19    1.76
  -3  -5 -10    5.68    2.48
  -3  -5 -10    3.68    1.99
   3   5  10    5.99    1.92
  -3  -5 -11    1.87    2.24
   3   5  11   -1.19    2.05
  -3  -5 -12    7.66    2.50
   3   5  12    4.11    2.66
  -3  -5 -13    2.67    2.62
   3   5  13    5.43    2.67
   3   4 -14    2.38    2.66
   3   4 -14    3.33    2.74
   3   4 -13    8.59    2.41
   3   4 -12    5.53    2.12
   3   4 -11    1.60    1.77
   3   4 -10    4.97    1.64
   3   4  -9   56.46    2.71
  -3  -4   5   11.01    1.27
  -3  -4   4   14.76    1.72
   3   4  -4   15.45    1.25
  -3  -4   3    8.60    1.15
   3   4  -3    6.37    1.09
  -3  -4   2   12.37    1.15
  -3  -4   2   14.96    1.30
   3   4  -2   14.57    1.31
   3   4  -2   13.37    1.23
   3   4  -2   13.31    1.22
  -3  -4   1  238.14    6.53
  -3  -4   1  239.70    6.72
  -3  -4   1  238.18    6.56
   3   4  -1  235.29    6.55
   3   4  -1  248.05    6.56
   3   4  -1  237.73    6.69
  -3  -4   0    8.13    0.83
  -3  -4   0    8.39    1.22
  -3  -4   0    8.01    0.90
   3   4   0    9.69    0.88
   3   4   0    8.20    0.84
  -3  -4  -1    1.14    0.70
  -3  -4  -1    0.21    1.15
  -3  -4  -1    1.74    0.82
   3   4   1    1.43    0.74
   3   4   1    1.39    0.85
   3   4   1    1.50    0.75
  -3  -4  -2    4.67    1.02
  -3  -4  -2    5.82    0.88
  -3  -4  -2    4.69    0.76
   3   4   2    2.87    0.94
  -3  -4  -3   34.41    1.95
   3   4   3   33.95    1.82
  -3  -4  -4   22.41    1.92
   3   4   4   24.36    1.83
  -3  -4  -5  165.57    5.03
   3   4   5  162.06    4.94
  -3  -4  -6    2.95    1.36
   3   4   6    4.74    1.32
  -3  -4  -7    7.62    1.56
  -3  -4  -7    8.42    1.62
   3   4   7    6.33    1.40
  -3  -4  -8    5.27    1.75
  -3  -4  -8    4.53    1.60
   3   4   8    6.74    1.55
  -3  -4  -9   -0.70    1.94
  -3  -4  -9   -1.17    1.70
   3   4   9   -1.03    1.64
  -3  -4 -10    2.94    1.94
  -3  -4 -10    0.00    2.21
   3   4  10    1.36    1.78
  -3  -4 -11   10.83    2.27
  -3  -4 -11   13.20    2.65
   3   4  11    9.84    2.19
  -3  -4 -12   -0.06    2.34
   3   4  12    3.52    2.94
  -3  -4 -13    8.04    3.29
   3   3 -14    9.57    2.84
   3   3 -13    8.23    2.43
   3   3 -12    5.82    2.06
   3   3 -11    9.56    1.85
   3   3 -10   15.52    1.71
  -3  -3   2   34.34    1.82
   3   3  -2   33.46    1.47
   3   3  -2   30.14    1.61
  -3  -3   1   -1.26    1.02
  -3  -3   1    0.41    0.71
  -3  -3   1    1.35    0.77
   3   3  -1   -0.61    0.70
   3   3  -1   -0.09    0.74
  -3  -3   0   49.84    1.93
  -3  -3   0   49.02    1.83
  -3  -3   0   47.89    1.78
  -3  -3   0   49.28    2.12
   3   3   0   48.96    1.78
   3   3   0   47.87    1.78
   3   3   0   47.87    1.82
  -3  -3  -1  146.13    4.18
  -3  -3  -1  150.10    4.24
  -3  -3  -1  147.84    4.19
   3   3   1  147.76    4.17
   3   3   1  148.78    4.16
  -3  -3  -2   75.23    2.39
  -3  -3  -2   72.49    2.52
   3   3   2   73.01    2.49
  -3  -3  -3   58.38    2.29
   3   3   3   57.00    2.21
  -3  -3  -4   22.10    1.90
  -3  -3  -4   25.16    1.81
   3   3   4   21.41    1.76
  -3  -3  -5    2.49    1.29
  -3  -3  -5    1.02    1.24
   3   3   5    0.81    1.19
  -3  -3  -6    5.58    1.35
  -3  -3  -6    5.46    1.35
   3   3   6    5.59    1.28
  -3  -3  -7   17.57    1.66
  -3  -3  -7   17.98    1.65
   3   3   7   19.39    2.02
  -3  -3  -8   15.86    1.87
  -3  -3  -8   14.73    1.73
   3   3   8   16.08    1.69
  -3  -3  -9    9.91    1.82
  -3  -3  -9    9.30    1.99
   3   3   9    7.53    1.68
  -3  -3 -10    5.13    2.23
  -3  -3 -10    6.49    1.94
   3   3  10    8.33    1.77
  -3  -3 -11   -1.34    2.28
  -3  -3 -11    1.16    1.98
   3   3  11   -0.08    1.96
  -3  -3 -12    9.94    2.34
  -3  -3 -13   -4.39    2.51
   3   2 -14    9.95    2.76
   3   2 -13    4.16    2.43
   3   2 -12   10.46    2.07
   3   2 -12    4.61    1.99
   3   2 -11   12.64    1.79
   3   2 -11    7.45    1.93
   3   2 -10    5.31    1.49
   3   2  -9   72.28    2.99
   3   2  -8    1.34    1.12
  -3  -2   1  205.40    5.45
  -3  -2   1  192.36    5.47
  -3  -2   1  207.71    5.55
   3   2  -1  176.88    5.49
   3   2  -1  212.52    5.45
  -3  -2   0   72.85    2.34
  -3  -2   0   73.20    2.36
   3   2   0   76.77    2.32
  -3  -2  -1   12.78    1.23
  -3  -2  -1   13.86    1.18
   3   2   1   14.51    1.10
   3   2   1   13.86    1.27
  -3  -2  -2  157.57    4.49
  -3  -2  -2  156.48    4.48
   3   2   2  152.59    4.45
  -3  -2  -3    0.15    0.95
  -3  -2  -3    0.03    0.96
   3   2   3    0.10    0.91
  -3  -2  -4   93.15    3.10
  -3  -2  -4   91.22    3.08
   3   2   4   88.77    3.04
  -3  -2  -5  141.29    4.28
  -3  -2  -5  136.81    4.26
   3   2   5  132.46    4.22
  -3  -2  -6   83.17    3.11
  -3  -2  -6   79.66    3.06
   3   2   6   81.17    3.03
  -3  -2  -7    8.66    1.45
  -3  -2  -7    7.12    1.43
   3   2   7    4.15    1.28
  -3  -2  -8   13.63    1.58
  -3  -2  -8   11.70    1.76
   3   2   8    9.58    1.59
  -3  -2  -9    3.78    1.63
  -3  -2  -9    1.68    1.84
   3   2   9    1.70    1.56
  -3  -2 -10    4.62    2.17
  -3  -2 -10    1.87    1.73
  -3  -2 -11    8.38    2.09
  -3  -2 -11    9.54    2.47
  -3  -2 -12    5.22    2.19
  -3  -2 -13    5.77    2.48
  -3  -2 -14    2.95    2.85
   3   1 -14    0.80    2.62
   3   1 -13   36.85    3.57
   3   1 -12    2.87    1.95
   3   1 -12    0.67    1.79
   3   1 -11   20.57    2.02
   3   1 -11   23.39    2.58
   3   1 -10    5.64    1.49
   3   1 -10    5.31    1.58
   3   1  -9    0.66    1.44
   3   1  -9    0.87    1.32
   3   1  -8   13.45    1.28
  -3  -1   1   -0.33    0.68
  -3  -1   1   -0.24    0.62
   3   1  -1   -0.63    0.62
   3   1  -1    0.27    0.67
  -3  -1   0    1.18    0.67
  -3  -1   0    2.25    0.78
  -3  -1   0    1.49    0.70
   3   1   0    1.85    0.71
   3   1   0    2.20    0.69
   3   1   0    1.73    0.66
  -3  -1  -1  204.43    5.40
  -3  -1  -1  195.98    5.41
  -3  -1  -1  200.68    5.40
  -3  -1  -1  182.69    5.50
   3   1   1  198.44    5.42
   3   1   1  203.59    5.38
   3   1   1  196.79    5.38
   3   1   1  195.76    5.46
  -3  -1  -2    6.61    0.94
  -3  -1  -2    6.63    0.93
   3   1   2    6.43    0.97
  -3  -1  -3    5.59    0.96
  -3  -1  -3    5.40    0.99
   3   1   3    5.84    0.95
  -3  -1  -4    1.24    1.03
  -3  -1  -4    1.25    1.01
   3   1   4    1.31    0.98
  -3  -1  -5   11.91    1.30
  -3  -1  -5   13.11    1.31
   3   1   5   13.06    1.30
  -3  -1  -6    5.10    1.29
  -3  -1  -6    3.30    1.23
   3   1   6    4.32    1.22
  -3  -1  -7   36.94    2.35
  -3  -1  -7   35.34    2.27
   3   1   7   36.80    2.21
  -3  -1  -8   -0.35    1.49
  -3  -1  -8    0.11    1.41
  -3  -1  -9   41.30    2.74
  -3  -1  -9   43.20    3.03
  -3  -1 -10    0.26    1.75
  -3  -1 -10    1.11    2.10
  -3  -1 -11   -3.06    1.90
  -3  -1 -11    0.06    2.39
  -3  -1 -12    5.41    2.14
  -3  -1 -13    5.43    2.48
  -3  -1 -14   -4.91    3.69
   3   0 -14    4.61    2.50
   3   0 -13    6.69    2.27
   3   0 -12    7.33    1.94
   3   0 -11    3.42    1.62
   3   0 -11    0.11    1.64
   3   0 -10    2.75    1.44
   3   0 -10    1.56    1.50
   3   0  -9    1.00    1.54
   3   0  -9   -2.10    1.27
   3   0  -8    8.79    1.20
   3   0  -8    7.13    1.38
   3   0  -7   -0.75    1.15
   3   0  -6   49.64    2.19
   3   0  -5   -0.17    1.01
   3   0  -4    1.84    0.99
   3   0  -3   -0.10    0.95
   3   0  -2  286.77    8.01
   3   0  -2  303.50    7.92
  -3   0   1    0.17    0.61
  -3   0   1   -0.35    0.72
  -3   0   1   -0.71    0.64
   3   0  -1   -0.20    0.81
   3   0  -1    0.72    0.67
   3   0  -1   -0.60    0.66
   3   0  -1    0.01    0.62
  -3   0   0    5.44    0.82
  -3   0   0    2.76    0.66
  -3   0   0    3.90    0.70
   3   0   0    3.53    0.68
   3   0   0    4.17    0.75
   3   0   0    4.39    0.68
  -3   0  -1   -1.14    0.63
  -3   0  -1    0.95    0.69
  -3   0  -1   -0.20    0.72
  -3   0  -1    0.93    0.87
   3   0   1   -0.08    0.64
   3   0   1    0.15    0.81
  -3   0  -2    7.51    0.92
  -3   0  -2    9.36    0.99
   3   0   2    9.73    0.97
  -3   0  -3   -0.06    0.92
  -3   0  -3   -0.65    0.89
   3   0   3    0.05    0.94
  -3   0  -4    3.15    1.07
  -3   0  -4    5.47    1.06
   3   0   4    4.01    1.10
  -3   0  -5   -0.21    1.10
  -3   0  -5    1.10    1.11
  -3   0  -6   14.68    1.40
  -3   0  -6   12.93    1.38
  -3   0  -7    0.40    1.25
  -3   0  -7   -0.07    1.31
  -3   0  -8   18.03    1.67
  -3   0  -8   16.38    1.79
  -3   0  -9   -1.70    1.53
  -3   0  -9   -0.27    1.70
  -3   0 -10    0.78    1.74
  -3   0 -10   -2.86    2.01
  -3   0 -11    2.64    2.34
  -3   0 -11    0.97    1.90
  -3   0 -12   15.36    2.32
  -3   0 -13    3.88    2.40
  -3   0 -13    0.60    3.13
  -3   0 -14   17.20    4.78
  -3   0 -14   12.78    2.85
   3  -1 -14    9.55    2.56
   3  -1 -13   34.90    3.49
   3  -1 -12   -0.57    1.90
   3  -1 -11   25.66    2.51
  -3   1  10    3.62    1.44
   3  -1 -10    6.88    1.42
   3  -1 -10    1.80    1.51
  -3   1   9   -0.29    1.25
   3  -1  -9    2.88    1.40
   3  -1  -9    1.32    1.48
  -3   1   8   11.71    1.25
   3  -1  -8   15.32    1.64
   3  -1  -8   11.26    1.43
   3  -1  -7  131.19    3.89
   3  -1  -7  126.37    4.02
  -3   1   6    6.06    0.92
   3  -1  -6    4.97    1.16
   3  -1  -5  167.81    4.85
   3  -1  -4   42.41    1.84
  -3   1   3   60.13    2.18
   3  -1  -3   56.26    1.99
   3  -1  -3   60.13    2.16
  -3   1   2   10.70    1.01
  -3   1   2    7.23    0.85
   3  -1  -2    8.22    1.22
   3  -1  -2    9.76    0.86
  -3   1   1   -0.52    0.64
  -3   1   1   -0.36    0.81
  -3   1   1   -0.08    0.78
  -3   1   1    0.39    0.69
   3  -1  -1    0.37    0.63
   3  -1  -1    0.60    0.75
   3  -1  -1   -0.03    0.68
   3  -1  -1    1.45    0.85
  -3   1   0    1.42    0.67
  -3   1   0    2.28    0.86
  -3   1   0    2.33    0.69
   3  -1   0    3.04    0.80
   3  -1   0    2.29    0.68
   3  -1   0    0.49    0.66
  -3   1  -1  199.12    5.35
  -3   1  -1  190.84    5.35
   3  -1   1  198.02    5.34
   3  -1   1  194.48    5.34
   3  -1   1  196.57    5.43
  -3   1  -2    6.58    0.94
   3  -1   2    6.24    0.94
  -3   1  -3    5.86    0.98
  -3   1  -3    5.41    0.99
   3  -1   3    4.55    0.97
  -3   1  -4    1.35    0.98
  -3   1  -4    1.29    1.02
   3  -1   4    0.22    1.03
  -3   1  -5   15.01    1.31
  -3   1  -5   14.86    1.29
   3  -1   5   15.82    1.33
  -3   1  -6    3.82    1.25
  -3   1  -6    6.38    1.25
  -3   1  -7   36.25    2.24
  -3   1  -7   38.55    2.33
  -3   1  -8   -0.40    1.36
  -3   1  -8   -0.13    1.47
  -3   1  -9   48.40    3.13
  -3   1  -9   46.92    2.77
  -3   1 -10    1.17    2.05
  -3   1 -10    2.04    1.71
  -3   1 -11    1.09    2.52
  -3   1 -11   -1.25    2.33
  -3   1 -11    1.21    1.93
  -3   1 -12    0.90    2.68
  -3   1 -12    4.29    2.13
  -3   1 -13    3.31    2.31
  -3   1 -13    4.71    3.11
  -3   1 -14    1.86    2.62
   3  -2 -14    0.09    2.47
   3  -2 -13    3.92    2.34
  -3   2  12    8.77    2.01
   3  -2 -12    9.48    2.07
  -3   2  11    7.67    1.72
   3  -2 -11    8.89    1.74
  -3   2  10    3.54    1.48
   3  -2 -10    1.84    1.50
  -3   2   9   72.12    2.87
   3  -2  -9   68.19    2.89
   3  -2  -9   74.36    2.90
  -3   2   8   -0.39    1.16
   3  -2  -8    0.35    1.11
   3  -2  -8    1.19    1.24
  -3   2   7   40.23    1.93
   3  -2  -7   39.09    1.93
   3  -2  -7   41.42    2.11
  -3   2   6    2.12    0.87
   3  -2  -6    4.40    1.14
   3  -2  -6    1.80    0.92
  -3   2   5    6.68    0.91
  -3   2   5    7.02    1.25
   3  -2  -5    5.67    1.12
  -3   2   4   23.03    1.65
  -3   2   4   23.65    1.43
   3  -2  -4   24.13    1.57
  -3   2   3   52.74    2.02
   3  -2  -3   50.97    2.00
   3  -2  -3   49.81    1.96
  -3   2   2   12.88    1.32
   3  -2  -2   13.43    1.02
   3  -2  -2   11.12    0.85
   3  -2  -2   12.92    1.62
   3  -2  -2   12.98    1.15
  -3   2   1  176.24    5.45
  -3   2   1  206.69    5.33
  -3   2   1  192.98    5.46
  -3   2   1  200.02    5.39
   3  -2  -1  207.43    5.35
   3  -2  -1  197.84    5.41
   3  -2  -1  203.96    5.41
   3  -2  -1  171.34    5.46
  -3   2   0   73.48    2.31
  -3   2   0   75.24    2.35
   3  -2   0   73.18    2.32
   3  -2   0   74.37    2.44
   3  -2   0   74.72    2.38
  -3   2  -1   14.53    1.21
  -3   2  -1   13.82    1.13
   3  -2   1   12.06    1.00
   3  -2   1   13.29    1.16
   3  -2   1   13.64    1.37
  -3   2  -2  150.44    4.39
   3  -2   2  154.04    4.39
  -3   2  -3    0.95    0.90
   3  -2   3    0.13    0.96
  -3   2  -4   86.47    2.88
   3  -2   4   90.02    2.95
  -3   2  -5  138.32    4.25
  -3   2  -5  135.40    4.13
   3  -2   5  135.32    4.16
  -3   2  -6   84.66    3.10
  -3   2  -6   80.33    2.99
   3  -2   6   82.16    3.00
  -3   2  -7    6.16    1.31
  -3   2  -7    5.22    1.40
  -3   2  -8   14.54    2.00
  -3   2  -8   13.09    1.56
  -3   2  -8   13.02    1.81
  -3   2  -9    1.88    1.86
  -3   2  -9    0.56    2.05
  -3   2  -9    4.97    1.58
  -3   2 -10    1.02    2.14
  -3   2 -10    4.13    1.70
  -3   2 -10    0.22    2.05
  -3   2 -11    9.26    2.57
  -3   2 -11   13.24    2.07
  -3   2 -11   12.65    2.55
  -3   2 -12    5.25    2.16
  -3   2 -12    8.02    2.75
  -3   2 -13    4.56    3.26
  -3   2 -13    5.87    2.37
  -3   2 -14    3.00    3.97
  -3   2 -14    6.07    2.66
   3  -3 -15   -5.08    2.41
   3  -3 -14    9.80    3.13
  -3   3  13    6.34    2.20
   3  -3 -13    6.17    2.43
  -3   3  12    5.13    1.98
   3  -3 -12   -1.40    2.03
  -3   3  11    6.80    1.76
   3  -3 -11    3.06    1.76
  -3   3  10   12.74    1.75
   3  -3 -10   11.40    1.64
  -3   3   9    1.07    1.33
   3  -3  -9   -0.01    1.30
   3  -3  -9    3.00    1.38
  -3   3   8   23.98    1.87
   3  -3  -8   21.97    2.16
   3  -3  -8   23.58    1.95
  -3   3   7   -0.38    1.01
   3  -3  -7    1.09    1.18
   3  -3  -7   -3.34    0.99
  -3   3   6    0.49    0.93
  -3   3   6   -0.07    1.28
   3  -3  -6    1.20    1.16
  -3   3   5  120.49    3.75
  -3   3   5  121.61    3.58
   3  -3  -5  115.95    3.72
  -3   3   4   41.31    1.98
  -3   3   4   40.38    1.77
   3  -3  -4   40.76    1.90
  -3   3   3    2.90    1.07
   3  -3  -3    2.26    0.95
   3  -3  -3    1.19    0.96
  -3   3   2   32.27    1.77
  -3   3   2   33.97    1.69
  -3   3   2   33.16    1.44
   3  -3  -2   33.29    1.50
   3  -3  -2   32.54    1.47
   3  -3  -2   33.75    1.65
   3  -3  -2   30.67    1.72
  -3   3   1    0.57    0.75
  -3   3   1    0.54    0.73
  -3   3   1   -0.81    0.90
  -3   3   1    0.77    0.94
   3  -3  -1    0.68    0.92
   3  -3  -1   -1.29    0.77
   3  -3  -1   -0.01    0.90
   3  -3  -1    0.42    0.73
  -3   3   0   48.79    2.03
  -3   3   0   49.57    1.80
  -3   3   0   50.18    1.84
  -3   3   0   47.04    1.99
  -3   3   0   48.45    1.89
   3  -3   0   51.54    1.86
   3  -3   0   49.15    1.98
   3  -3   0   50.37    1.78
  -3   3  -1  145.89    4.19
  -3   3  -1  152.63    4.18
  -3   3  -1  143.63    4.27
  -3   3  -1  149.65    4.21
  -3   3  -1  146.89    4.35
   3  -3   1  147.69    4.29
   3  -3   1  152.02    4.26
   3  -3   1  147.36    4.15
   3  -3   1  146.89    4.17
  -3   3  -2   74.06    2.32
  -3   3  -2   71.84    2.64
  -3   3  -2   69.71    2.47
  -3   3  -2   70.11    2.32
   3  -3   2   76.99    2.53
  -3   3  -3   53.57    2.41
  -3   3  -3   54.17    2.14
   3  -3   3   58.64    2.24
  -3   3  -4   26.78    1.67
  -3   3  -4   22.97    2.17
   3  -3   4   25.62    1.78
  -3   3  -5    2.68    1.08
  -3   3  -5    0.39    1.41
   3  -3   5    2.67    1.12
  -3   3  -6    6.13    1.22
  -3   3  -6    7.69    1.56
  -3   3  -6    5.78    1.39
   3  -3   6    7.41    1.27
  -3   3  -7   19.93    1.92
  -3   3  -7   18.37    1.72
  -3   3  -7   21.02    1.88
   3  -3   7   20.67    2.02
  -3   3  -8   17.38    1.57
  -3   3  -8   17.87    1.87
  -3   3  -8   16.99    1.97
  -3   3  -9    8.06    2.06
  -3   3  -9    5.91    1.95
  -3   3  -9    9.14    1.62
  -3   3 -10   10.83    1.81
  -3   3 -10   12.19    2.40
  -3   3 -10    9.59    2.27
  -3   3 -11    0.95    2.38
  -3   3 -11   -0.97    2.60
  -3   3 -11    1.34    1.87
  -3   3 -12   17.86    3.06
  -3   3 -12   16.48    2.23
  -3   3 -13   -1.72    3.21
  -3   3 -13    3.62    2.27
  -3   3 -14   -1.91    3.72
  -3   4  14    4.53    2.57
  -3   4  13    7.78    2.25
   3  -4 -13   -2.44    2.42
  -3   4  12    5.59    2.03
   3  -4 -12    3.21    2.09
  -3   4  11    4.51    1.82
   3  -4 -11    1.35    1.81
   3  -4 -11    5.64    1.85
  -3   4  10    2.34    1.59
   3  -4 -10   -3.11    1.50
  -3   4   9   53.31    2.60
   3  -4  -9   51.73    2.72
  -3   4   8   -1.70    1.20
  -3   4   8    0.18    1.55
   3  -4  -8    0.79    1.39
  -3   4   7   67.29    2.59
  -3   4   7   63.79    2.78
   3  -4  -7   66.09    2.71
  -3   4   6   18.61    1.69
  -3   4   6   20.05    1.59
   3  -4  -6   21.01    1.83
  -3   4   5   10.47    1.33
  -3   4   5    9.29    1.09
   3  -4  -5   10.80    1.34
  -3   4   4   18.08    1.45
  -3   4   4   13.29    1.42
   3  -4  -4   14.74    1.34
  -3   4   3    7.30    1.17
   3  -4  -3    7.20    0.87
   3  -4  -3    7.25    1.14
   3  -4  -3    6.16    0.81
  -3   4   2   15.85    1.24
  -3   4   2   12.81    1.22
  -3   4   2   12.79    0.93
   3  -4  -2   13.13    1.15
   3  -4  -2   11.43    0.89
   3  -4  -2   13.46    1.43
   3  -4  -2   12.10    0.98
  -3   4   1  238.11    6.63
  -3   4   1  233.22    6.54
  -3   4   1  245.44    6.55
  -3   4   1  245.47    6.66
   3  -4  -1  247.35    6.67
   3  -4  -1  235.66    6.54
   3  -4  -1  231.33    6.63
   3  -4  -1  239.53    6.56
  -3   4   0   10.63    1.12
  -3   4   0   10.89    0.89
  -3   4   0    8.03    0.87
  -3   4   0    8.96    1.04
  -3   4   0    7.90    1.06
   3  -4   0    8.06    0.83
   3  -4   0    8.71    1.12
   3  -4   0    8.46    1.03
   3  -4   0    9.85    1.06
   3  -4   0    8.98    0.95
  -3   4  -1    1.02    0.79
  -3   4  -1    3.17    1.02
  -3   4  -1   -0.40    0.79
  -3   4  -1    0.18    0.99
  -3   4  -1    1.26    0.94
   3  -4   1    0.13    1.17
   3  -4   1    0.61    0.82
   3  -4   1    0.06    0.98
   3  -4   1    0.88    0.75
  -3   4  -2    5.44    0.97
  -3   4  -2    6.17    0.84
  -3   4  -2    4.54    1.11
  -3   4  -2    5.07    0.80
   3  -4   2    5.95    1.08
  -3   4  -3   34.27    2.17
  -3   4  -3   31.73    1.79
   3  -4   3   35.11    1.86
  -3   4  -4   24.51    1.71
  -3   4  -4   25.08    2.24
   3  -4   4   25.76    1.86
  -3   4  -5  171.81    5.26
  -3   4  -5  157.68    4.92
   3  -4   5  172.09    4.97
  -3   4  -6    5.68    1.63
  -3   4  -6    5.25    1.25
   3  -4   6    6.81    1.28
  -3   4  -7    5.87    1.75
  -3   4  -7    9.14    1.35
   3  -4   7    8.09    1.39
  -3   4  -8    3.65    1.89
  -3   4  -8    8.29    1.46
  -3   4  -8    8.91    1.81
   3  -4   8    6.43    1.53
  -3   4  -9    1.91    1.57
  -3   4  -9   -0.50    1.94
  -3   4  -9   -2.58    2.02
  -3   4 -10   -2.26    2.26
  -3   4 -10    0.39    2.25
  -3   4 -10    0.76    1.71
  -3   4 -11   10.53    2.63
  -3   4 -11   12.68    2.05
  -3   4 -11   11.21    2.74
  -3   4 -12    2.05    2.13
  -3   4 -12    1.73    2.88
  -3   4 -13   10.15    5.54
  -3   4 -13   11.98    2.49
  -3   5  14    1.45    2.60
  -3   5  13    6.82    2.35
  -3   5  12   -0.96    1.98
  -3   5  11   10.35    1.93
  -3   5  10   -0.41    1.54
   3  -5 -10   -1.11    1.71
  -3   5   9   29.87    2.37
   3  -5  -9   27.85    2.41
  -3   5   8    0.26    1.24
  -3   5   8    1.53    1.62
   3  -5  -8    2.18    1.47
  -3   5   7   16.74    1.82
  -3   5   7   15.77    1.68
   3  -5  -7   16.02    1.61
  -3   5   6    1.94    1.13
  -3   5   6    1.57    1.66
   3  -5  -6    1.09    1.32
  -3   5   5    9.38    1.19
  -3   5   5    9.12    1.41
   3  -5  -5    6.16    1.32
  -3   5   4    2.86    1.29
   3  -5  -4    3.65    1.24
  -3   5   3    4.04    1.25
   3  -5  -3    5.37    1.20
   3  -5  -3    3.22    0.82
   3  -5  -3    4.89    0.93
  -3   5   2   23.57    1.69
  -3   5   2   21.35    1.41
  -3   5   2   20.87    1.42
   3  -5  -2   22.23    1.74
   3  -5  -2   20.96    1.65
   3  -5  -2   16.10    1.37
   3  -5  -2   20.78    1.54
  -3   5   1   80.32    2.75
  -3   5   1   84.22    2.66
  -3   5   1   84.79    2.83
  -3   5   1   82.91    2.66
   3  -5  -1   82.81    2.64
   3  -5  -1   83.76    2.80
   3  -5  -1   84.11    2.68
   3  -5  -1   80.39    2.83
   3  -5  -1   83.66    2.89
  -3   5   0    7.71    1.06
  -3   5   0   11.35    0.95
  -3   5   0    9.46    1.07
  -3   5   0    9.42    0.93
  -3   5   0   10.28    1.22
   3  -5   0    9.71    1.20
   3  -5   0   10.86    1.17
   3  -5   0   12.54    1.21
   3  -5   0    8.36    0.98
   3  -5   0    8.03    0.90
  -3   5  -1   11.98    1.17
  -3   5  -1   12.24    1.01
  -3   5  -1   14.43    1.28
  -3   5  -1   11.74    1.19
  -3   5  -1   13.32    1.01
   3  -5   1   11.93    1.22
   3  -5   1   13.15    1.34
   3  -5   1   13.75    1.05
   3  -5   1   13.59    1.21
   3  -5   1   11.99    1.24
  -3   5  -2   24.87    1.68
  -3   5  -2   26.03    1.49
  -3   5  -2   28.08    1.57
  -3   5  -2   29.25    1.95
   3  -5   2   23.14    1.66
   3  -5   2   26.90    1.79
   3  -5   2   24.94    2.19
  -3   5  -3    7.74    1.08
  -3   5  -3    8.61    1.35
   3  -5   3    8.88    1.18
  -3   5  -4    1.16    1.38
  -3   5  -4   -0.02    1.04
   3  -5   4   -0.50    1.12
  -3   5  -5    0.51    1.15
  -3   5  -5    0.47    1.43
   3  -5   5   -0.77    1.16
  -3   5  -6    5.74    1.28
  -3   5  -6    6.05    1.67
   3  -5   6    7.12    1.38
  -3   5  -7   39.46    2.96
  -3   5  -7   42.33    2.30
   3  -5   7   38.48    2.44
  -3   5  -8    6.90    1.52
  -3   5  -8    8.55    2.06
   3  -5   8    6.72    1.54
  -3   5  -9    6.70    2.22
  -3   5  -9    6.75    1.67
  -3   5  -9    6.99    2.16
   3  -5   9    8.00    1.78
  -3   5 -10    3.01    2.40
  -3   5 -10    9.21    2.51
  -3   5 -10    3.96    1.83
  -3   5 -11    5.18    4.15
  -3   5 -11   -2.78    2.69
  -3   5 -11    1.86    1.92
  -3   5 -12    7.13    2.29
  -3   5 -12    5.66    3.21
  -3   5 -13    7.37    2.38
  -3   5 -13    9.13    3.41
  -3   6  14    9.43    4.04
  -3   6  13    1.01    2.50
  -3   6  12   11.24    2.29
   3  -6 -12   10.44    2.32
  -3   6  11   -0.74    1.80
   3  -6 -11   -1.07    2.01
  -3   6  10   -0.01    1.66
  -3   6  10    3.16    2.24
   3  -6 -10   -0.63    1.82
  -3   6   9   24.42    2.32
  -3   6   9   24.38    1.95
   3  -6  -9   20.05    2.01
  -3   6   8   -0.39    1.42
  -3   6   8    1.59    1.74
   3  -6  -8    1.40    1.51
  -3   6   7   61.23    2.68
  -3   6   7   61.97    2.91
   3  -6  -7   63.13    2.83
  -3   6   6   46.47    2.35
  -3   6   6   52.64    2.58
   3  -6  -6   48.14    2.50
  -3   6   5    1.15    1.39
  -3   6   5    0.12    1.16
   3  -6  -5    2.33    1.33
  -3   6   4   25.93    2.05
   3  -6  -4   24.09    1.95
   3  -6  -4   24.94    1.65
  -3   6   3   42.83    2.14
   3  -6  -3   39.01    1.89
   3  -6  -3   38.49    1.82
   3  -6  -3   38.39    2.13
  -3   6   2    4.22    1.30
  -3   6   2    1.79    0.88
   3  -6  -2    3.28    1.28
   3  -6  -2    1.98    0.90
   3  -6  -2    1.75    0.99
   3  -6  -2    2.10    1.16
  -3   6   1   81.22    2.85
  -3   6   1   78.95    2.61
  -3   6   1   75.22    2.65
  -3   6   1   73.94    2.70
   3  -6  -1   78.66    2.89
   3  -6  -1   78.28    2.62
   3  -6  -1   78.52    2.80
   3  -6  -1   79.93    2.66
   3  -6  -1   77.38    2.83
  -3   6   0  171.14    4.82
  -3   6   0  172.03    4.95
  -3   6   0  161.85    4.82
  -3   6   0  164.21    4.94
   3  -6   0  172.10    4.84
   3  -6   0  171.94    4.96
   3  -6   0  162.66    4.80
   3  -6   0  167.24    4.99
   3  -6   0  167.91    4.99
  -3   6  -1   27.80    1.88
  -3   6  -1   31.20    1.72
  -3   6  -1   29.33    2.01
  -3   6  -1   28.76    1.92
  -3   6  -1   30.21    1.70
   3  -6   1   32.50    1.75
   3  -6   1   28.42    1.60
   3  -6   1   26.92    1.91
   3  -6   1   32.82    1.95
   3  -6   1   28.57    2.16
  -3   6  -2  116.14    3.58
  -3   6  -2  112.73    3.46
  -3   6  -2  112.96    3.43
  -3   6  -2  109.03    3.73
  -3   6  -2  105.25    3.57
   3  -6   2  109.69    3.82
   3  -6   2  108.73    3.57
   3  -6   2  117.25    3.61
  -3   6  -3    7.54    1.35
  -3   6  -3    5.94    1.00
  -3   6  -3    4.94    1.36
  -3   6  -3    4.98    1.17
   3  -6   3    6.33    1.23
   3  -6   3    8.31    2.63
  -3   6  -4    3.92    1.34
  -3   6  -4    2.55    1.16
   3  -6   4    1.17    1.16
  -3   6  -5   25.21    2.44
  -3   6  -5   27.64    1.92
   3  -6   5   28.07    2.06
  -3   6  -6   43.10    2.86
  -3   6  -6   42.39    2.33
   3  -6   6   40.26    2.83
  -3   6  -7   13.79    1.93
  -3   6  -7   13.96    1.54
   3  -6   7   14.98    1.59
  -3   6  -8   31.63    3.20
  -3   6  -8   32.43    2.43
   3  -6   8   32.00    2.53
  -3   6  -9    5.57    2.19
  -3   6  -9    4.07    1.70
  -3   6  -9    6.58    2.24
   3  -6   9    0.61    1.70
  -3   6 -10    0.70    2.48
  -3   6 -10    4.13    2.44
  -3   6 -11    7.31    2.81
  -3   6 -11   10.63    1.99
  -3   6 -12    1.20    3.62
  -3   6 -12    0.83    2.13
  -3   6 -13   -3.09    3.38
  -3   6 -13    4.34    2.40
  -3   7  14    1.48    2.96
  -3   7  13   16.36    2.78
  -3   7  12    1.96    2.12
  -3   7  11   11.61    2.00
   3  -7 -11   11.56    2.29
  -3   7  10   -2.25    2.38
  -3   7  10    0.87    1.75
   3  -7 -10    0.53    1.95
  -3   7   9    3.81    1.64
  -3   7   9    2.51    2.09
   3  -7  -9    3.61    1.86
  -3   7   8    7.27    2.01
  -3   7   8    3.06    1.57
   3  -7  -8    7.07    1.75
  -3   7   7   49.81    2.87
  -3   7   7   45.89    2.55
   3  -7  -7   47.81    2.70
  -3   7   6   10.51    1.69
  -3   7   6    7.75    1.35
   3  -7  -6   11.12    1.58
  -3   7   5   47.82    2.42
  -3   7   5   54.37    2.65
   3  -7  -5   53.04    2.55
  -3   7   4    0.76    1.45
   3  -7  -4    1.64    1.34
   3  -7  -4    1.21    1.23
   3  -7  -4    1.31    0.99
  -3   7   3   15.21    1.58
   3  -7  -3   12.44    1.56
   3  -7  -3   12.53    1.45
   3  -7  -3   11.47    1.14
  -3   7   2    1.62    0.95
   3  -7  -2   -1.09    1.34
   3  -7  -2   -0.81    1.25
   3  -7  -2   -0.21    1.66
   3  -7  -2    0.31    0.94
  -3   7   1   10.89    1.10
  -3   7   1   13.77    1.46
  -3   7   1   11.83    1.11
  -3   7   1   10.03    1.23
   3  -7  -1    9.03    1.09
   3  -7  -1   12.74    1.38
   3  -7  -1   10.79    1.48
   3  -7  -1    9.76    1.35
   3  -7  -1    9.28    1.17
  -3   7   0    1.43    1.21
  -3   7   0    0.19    1.03
  -3   7   0    2.70    0.98
  -3   7   0    2.05    1.32
   3  -7   0    1.82    1.03
   3  -7   0    1.14    1.27
   3  -7   0    1.69    0.95
   3  -7   0   -0.40    1.28
   3  -7   0    1.62    1.24
  -3   7  -1   67.57    2.76
  -3   7  -1   64.11    2.45
  -3   7  -1   67.09    2.64
  -3   7  -1   66.54    2.63
   3  -7   1   61.55    2.34
   3  -7   1   66.83    2.48
   3  -7   1   69.34    2.66
   3  -7   1   64.64    2.84
   3  -7   1   61.07    2.64
  -3   7  -2   -0.75    1.17
  -3   7  -2    0.99    1.27
  -3   7  -2    0.68    1.63
  -3   7  -2    1.21    1.31
  -3   7  -2   -0.27    0.98
   3  -7   2   -0.90    1.22
   3  -7   2    0.02    1.19
  -3   7  -3    8.85    1.45
  -3   7  -3    8.53    1.16
  -3   7  -3    6.77    1.09
  -3   7  -3    6.17    1.26
  -3   7  -3    7.01    1.46
   3  -7   3    7.82    1.58
   3  -7   3    7.50    1.28
  -3   7  -4    0.95    1.43
  -3   7  -4    0.57    1.05
  -3   7  -4    1.36    1.68
  -3   7  -4    0.81    1.24
  -3   7  -4   -0.59    1.10
   3  -7   4    0.97    1.66
   3  -7   4    2.26    1.25
  -3   7  -5    0.51    1.27
  -3   7  -5    0.68    1.52
   3  -7   5   -1.14    2.40
  -3   7  -6    2.69    1.32
  -3   7  -6    1.80    1.72
   3  -7   6   -0.50    1.42
  -3   7  -7   38.37    3.08
  -3   7  -7   34.09    2.35
   3  -7   7   29.93    2.53
  -3   7  -8    5.15    2.05
   3  -7   8    8.53    1.71
  -3   7  -9    7.74    1.76
  -3   7  -9    6.90    2.35
   3  -7   9    8.73    1.92
  -3   7 -10    0.58    2.63
  -3   7 -10    6.50    2.50
  -3   7 -10    4.21    1.92
   3  -7  10    3.02    2.08
  -3   7 -11    1.31    2.94
  -3   7 -11   -0.50    2.00
  -3   7 -12   -1.10    2.23
  -3   7 -12   -4.44    3.35
  -3   8  13   -0.58    2.88
  -3   8  12    5.26    2.25
  -3   8  11    4.96    3.05
  -3   8  11    2.17    2.02
   3  -8 -11    4.95    2.28
  -3   8  10   -0.56    1.79
   3  -8 -10    2.61    2.08
  -3   8   9    0.98    1.82
  -3   8   9    4.59    2.40
   3  -8  -9    2.17    1.97
  -3   8   8   26.39    2.54
  -3   8   8   22.77    2.39
   3  -8  -8   27.34    2.72
  -3   8   7    6.21    1.53
  -3   8   7    5.60    1.95
   3  -8  -7    5.39    1.77
  -3   8   6   47.84    2.88
  -3   8   6   44.77    2.53
   3  -8  -6   40.01    2.62
  -3   8   5    6.88    1.72
   3  -8  -5    9.35    1.29
   3  -8  -5    9.16    1.22
   3  -8  -5    6.47    1.57
  -3   8   4    7.04    1.60
   3  -8  -4    4.80    1.21
   3  -8  -4    5.75    1.09
   3  -8  -4    4.07    1.52
  -3   8   3   -0.91    0.95
  -3   8   3   -1.01    1.44
  -3   8   3    1.51    1.01
   3  -8  -3    0.96    1.38
   3  -8  -3    0.59    1.14
   3  -8  -3   -0.85    0.98
   3  -8  -3    0.75    1.37
  -3   8   2    0.75    1.45
  -3   8   2   -0.93    1.02
  -3   8   2   -0.34    0.97
   3  -8  -2   -1.32    1.32
   3  -8  -2   -0.50    1.38
   3  -8  -2    0.97    1.31
   3  -8  -2   -0.50    1.11
   3  -8  -2    0.20    1.01
  -3   8   1    0.51    1.18
  -3   8   1    0.80    1.40
  -3   8   1    0.32    1.05
   3  -8  -1    2.53    1.04
   3  -8  -1    1.21    1.37
   3  -8  -1   -0.03    1.11
   3  -8  -1   -0.27    1.34
   3  -8  -1    3.59    1.40
  -3   8   0   48.99    2.23
  -3   8   0   51.27    2.19
  -3   8   0   48.65    2.48
  -3   8   0   50.12    2.45
   3  -8   0   50.97    2.51
   3  -8   0   53.02    2.25
   3  -8   0   45.73    2.43
   3  -8   0   46.86    2.10
   3  -8   0   51.77    2.58
  -3   8  -1    4.09    1.11
  -3   8  -1    3.00    1.35
  -3   8  -1    3.04    1.11
  -3   8  -1    4.37    1.41
   3  -8   1    2.36    0.98
   3  -8   1    3.19    1.22
   3  -8   1    2.43    1.37
   3  -8   1    1.99    1.49
   3  -8   1    1.42    1.59
  -3   8  -2   25.30    1.87
  -3   8  -2   26.45    2.08
  -3   8  -2   25.79    1.84
  -3   8  -2   28.14    2.05
  -3   8  -2   28.15    2.29
   3  -8   2   20.83    2.45
   3  -8   2   24.21    1.62
   3  -8   2   27.06    2.50
   3  -8   2   22.10    1.93
  -3   8  -3   21.12    1.80
  -3   8  -3   17.41    1.67
  -3   8  -3   18.97    1.78
  -3   8  -3   21.87    2.00
  -3   8  -3   19.68    1.86
   3  -8   3   16.41    1.67
   3  -8   3   22.08    1.92
  -3   8  -4    2.47    1.62
  -3   8  -4    0.54    1.53
  -3   8  -4   -1.11    1.21
  -3   8  -4    0.00    1.30
  -3   8  -4   -0.06    1.12
   3  -8   4    1.63    1.36
   3  -8   4   -2.03    1.75
  -3   8  -5    0.98    1.62
  -3   8  -5    0.78    1.36
  -3   8  -5    0.25    1.60
   3  -8   5   -2.21    2.00
   3  -8   5   -1.06    1.37
  -3   8  -6   14.55    1.62
  -3   8  -6   17.03    1.97
   3  -8   6   15.06    1.72
  -3   8  -7    4.18    1.57
  -3   8  -7    2.03    1.97
   3  -8   7    2.82    1.63
  -3   8  -8   13.53    1.82
  -3   8  -8   11.56    2.28
   3  -8   8    9.97    1.88
  -3   8  -9   19.79    2.75
  -3   8 -10    4.59    2.79
  -3   8 -12    1.75    3.21
  -3   8 -12    1.62    2.40
  -3   9  13    8.41    2.88
  -3   9  12    4.85    3.28
   3  -9 -12   -1.88    2.62
  -3   9  11   17.23    3.37
  -3   9  11   11.95    2.34
   3  -9 -11    9.74    2.53
  -3   9  10   14.59    2.98
  -3   9  10   13.43    2.14
   3  -9 -10   13.91    2.42
  -3   9   9    1.42    2.61
  -3   9   9    0.74    1.77
   3  -9  -9    0.48    2.06
  -3   9   8   41.37    2.89
  -3   9   8   41.82    3.50
   3  -9  -8   47.59    3.07
  -3   9   7   13.08    2.20
  -3   9   7    7.64    1.67
   3  -9  -7   11.58    1.94
  -3   9   6    6.46    2.05
  -3   9   6    4.93    1.55
   3  -9  -6    5.07    1.46
   3  -9  -6    5.96    1.26
   3  -9  -6    4.33    1.83
  -3   9   5   12.28    2.05
   3  -9  -5   11.38    1.65
   3  -9  -5   12.25    1.40
   3  -9  -5   10.42    1.49
  -3   9   4   17.87    1.87
   3  -9  -4   12.85    1.33
   3  -9  -4   14.82    1.74
   3  -9  -4   16.81    1.49
  -3   9   3   -1.74    1.66
  -3   9   3   -0.49    1.00
  -3   9   3   -1.57    1.09
   3  -9  -3   -3.30    1.50
   3  -9  -3    0.25    1.13
   3  -9  -3   -0.39    1.23
   3  -9  -3    1.98    1.53
  -3   9   2   83.44    2.95
  -3   9   2   85.48    3.22
  -3   9   2   85.43    2.95
  -3   9   2   81.49    3.30
   3  -9  -2   79.10    3.27
   3  -9  -2   87.82    3.29
   3  -9  -2   84.01    3.07
   3  -9  -2   79.49    3.69
   3  -9  -2   81.66    2.99
  -3   9   1    5.13    1.52
  -3   9   1    3.56    1.17
  -3   9   1    7.98    1.20
  -3   9   1    5.66    1.37
   3  -9  -1    1.78    1.27
   3  -9  -1    5.45    1.51
   3  -9  -1    4.52    1.63
   3  -9  -1    2.97    1.06
   3  -9  -1    4.54    1.50
  -3   9   0   20.07    2.15
  -3   9   0   17.31    1.61
  -3   9   0   20.36    1.85
   3  -9   0   17.49    1.74
   3  -9   0   19.30    1.89
   3  -9   0   18.00    1.71
   3  -9   0   20.97    2.38
   3  -9   0   15.94    1.67
  -3   9  -1   12.21    1.52
  -3   9  -1   14.65    1.71
  -3   9  -1   12.19    1.29
  -3   9  -1   11.63    1.27
   3  -9   1   10.58    1.20
   3  -9   1   10.95    1.52
   3  -9   1   10.71    1.73
   3  -9   1   12.90    1.39
   3  -9   1    9.72    1.55
  -3   9  -2    3.07    1.53
  -3   9  -2    1.34    1.17
  -3   9  -2    1.03    1.55
  -3   9  -2    2.11    1.25
   3  -9   2    3.72    1.27
   3  -9   2    3.89    1.42
   3  -9   2    5.73    1.69
   3  -9   2    3.79    1.04
  -3   9  -3    4.93    1.37
  -3   9  -3    3.67    1.58
  -3   9  -3    4.94    1.70
  -3   9  -3    6.59    1.41
  -3   9  -3    4.81    1.19
   3  -9   3    5.61    1.85
   3  -9   3    3.66    1.43
  -3   9  -4   10.09    1.87
  -3   9  -4   10.27    1.48
  -3   9  -4   10.09    1.79
  -3   9  -4   13.79    1.52
  -3   9  -4   11.28    1.34
   3  -9   4   12.51    2.06
   3  -9   4   12.20    1.59
  -3   9  -5    2.25    1.25
  -3   9  -5    1.75    1.49
  -3   9  -5   -0.11    1.77
  -3   9  -5    2.70    1.47
  -3   9  -5    4.45    1.92
   3  -9   5    3.55    2.21
   3  -9   5    2.84    1.53
  -3   9  -6    6.68    1.62
  -3   9  -6    8.82    1.99
   3  -9   6    8.31    1.69
  -3   9  -7   10.56    1.76
  -3   9  -7   12.03    2.17
   3  -9   7    5.31    1.88
  -3   9  -8    0.00    2.23
  -3   9  -9    4.60    2.44
  -3   9 -10    1.73    2.90
  -3   9 -11    0.81    3.06
  -3   9 -12   -0.91    3.27
  -3  10  12   -0.68    2.55
   3 -10 -12    0.75    2.84
  -3  10  11    3.74    3.35
  -3  10  11    5.91    2.52
   3 -10 -11    6.29    2.70
  -3  10  10    2.01    2.25
  -3  10  10   -4.45    3.17
   3 -10 -10    1.21    2.35
  -3  10   9    5.52    1.97
  -3  10   9    0.47    2.87
   3 -10  -9    0.47    2.29
  -3  10   8   -0.23    1.76
  -3  10   8    3.96    2.68
   3 -10  -8    3.47    2.08
  -3  10   7    4.66    2.42
  -3  10   7    3.56    1.73
   3 -10  -7    3.11    1.73
   3 -10  -7    2.03    1.89
  -3  10   6    0.50    1.60
  -3  10   6   -1.24    2.19
   3 -10  -6    0.77    1.84
   3 -10  -6   -3.97    1.57
   3 -10  -6    0.99    1.42
  -3  10   5   15.16    2.22
   3 -10  -5   11.10    1.91
   3 -10  -5   16.73    1.71
   3 -10  -5   12.07    1.52
  -3  10   4    0.88    1.91
   3 -10  -4    2.35    1.71
   3 -10  -4    3.50    1.33
   3 -10  -4    4.11    1.49
  -3  10   3   25.66    2.61
  -3  10   3   25.71    1.95
  -3  10   3   25.57    2.05
   3 -10  -3   31.41    2.68
   3 -10  -3   24.47    2.07
   3 -10  -3   26.03    2.42
   3 -10  -3   24.39    2.26
  -3  10   2    8.33    1.54
  -3  10   2    7.17    1.28
  -3  10   2    9.43    1.82
  -3  10   2    6.27    1.29
   3 -10  -2    5.00    1.63
   3 -10  -2    8.55    1.76
   3 -10  -2    8.09    1.51
   3 -10  -2    6.80    1.25
   3 -10  -2    6.73    1.71
  -3  10   1    1.34    1.20
  -3  10   1    1.58    1.55
  -3  10   1    4.92    1.74
  -3  10   1    0.55    1.25
   3 -10  -1    0.41    1.54
   3 -10  -1    2.55    1.40
   3 -10  -1    1.20    1.23
   3 -10  -1    2.29    1.72
   3 -10  -1    3.62    1.68
  -3  10   0    3.93    1.30
  -3  10   0    6.88    1.78
  -3  10   0    3.76    1.48
   3 -10   0    6.49    1.67
   3 -10   0    5.38    1.74
   3 -10   0    6.66    1.26
   3 -10   0    5.56    1.37
   3 -10   0    5.97    1.58
  -3  10  -1    2.46    1.57
  -3  10  -1    3.03    1.32
  -3  10  -1    3.29    1.74
   3 -10   1    3.49    1.39
   3 -10   1    2.99    1.58
   3 -10   1    2.55    1.55
   3 -10   1    1.77    1.83
   3 -10   1   -0.17    1.14
  -3  10  -2    1.94    1.79
  -3  10  -2   -3.43    1.35
  -3  10  -2   -0.48    1.58
  -3  10  -2    1.17    1.29
   3 -10   2   -0.60    1.52
   3 -10   2   -0.28    1.87
   3 -10   2   -0.47    1.06
   3 -10   2   -0.13    1.36
  -3  10  -3   20.23    1.74
  -3  10  -3   22.26    2.18
  -3  10  -3   26.71    2.60
  -3  10  -3   24.81    2.76
   3 -10   3   25.16    2.47
   3 -10   3   18.36    2.34
  -3  10  -4    1.10    1.58
  -3  10  -4    2.47    1.40
  -3  10  -4    1.23    1.78
  -3  10  -4   -0.22    1.55
  -3  10  -4   -0.29    1.93
   3 -10   4    2.51    1.63
   3 -10   4   -0.65    2.16
  -3  10  -5   10.03    1.49
  -3  10  -5   11.15    1.75
  -3  10  -5   11.58    2.26
  -3  10  -5    9.13    1.68
  -3  10  -5    8.78    1.98
   3 -10   5   10.71    1.80
   3 -10   5   11.71    2.52
  -3  10  -6    1.25    1.48
  -3  10  -6   -1.56    1.98
  -3  10  -6    2.73    1.72
  -3  10  -6    2.02    2.30
   3 -10   6   -2.11    1.75
   3 -10   6    0.78    2.73
  -3  10  -7    1.91    2.22
  -3  10  -7   -1.38    2.38
  -3  10  -8    0.93    2.41
  -3  10  -9   19.81    2.93
  -3  10 -10    0.31    2.98
  -3  10 -11    8.12    3.29
  -3  11  11   -0.08    2.45
   3 -11 -11   -2.46    2.64
  -3  11  10    6.67    2.44
   3 -11 -10    5.96    2.53
  -3  11   9   -1.48    2.10
  -3  11   9   -0.14    2.96
   3 -11  -9    3.29    2.30
  -3  11   8   26.96    2.99
  -3  11   8   26.49    3.14
   3 -11  -8   21.76    2.08
   3 -11  -8   30.02    3.25
  -3  11   7    3.77    1.82
  -3  11   7    5.00    2.71
   3 -11  -7    4.32    1.97
   3 -11  -7    3.48    2.22
   3 -11  -7    1.79    1.61
  -3  11   6    2.39    2.52
  -3  11   6    1.43    1.71
   3 -11  -6   -0.46    1.86
   3 -11  -6    1.93    2.05
   3 -11  -6    0.61    1.59
  -3  11   5   -0.57    2.22
   3 -11  -5    1.99    1.73
   3 -11  -5   -1.65    1.47
   3 -11  -5    3.31    1.97
  -3  11   4    7.65    2.23
   3 -11  -4   11.67    1.77
   3 -11  -4   12.94    2.19
   3 -11  -4    8.30    1.46
   3 -11  -4    6.78    1.94
  -3  11   3   -1.80    1.73
  -3  11   3    0.84    2.08
  -3  11   3    2.84    1.37
  -3  11   3    2.72    1.28
   3 -11  -3    3.08    1.33
   3 -11  -3   -0.31    1.79
   3 -11  -3   -0.71    1.87
   3 -11  -3    6.97    1.94
   3 -11  -3    3.94    1.60
  -3  11   2   30.60    2.72
  -3  11   2   25.25    2.29
  -3  11   2   27.95    2.81
  -3  11   2   28.99    2.19
   3 -11  -2   25.76    2.56
   3 -11  -2   30.43    2.89
   3 -11  -2   27.39    2.54
   3 -11  -2   26.81    2.24
   3 -11  -2   30.70    3.00
  -3  11   1    1.40    1.89
  -3  11   1   -1.66    1.70
  -3  11   1    0.14    1.38
  -3  11   1    1.39    1.34
   3 -11  -1    2.05    1.59
   3 -11  -1    0.11    1.79
   3 -11  -1   -0.89    1.32
   3 -11  -1    1.24    1.66
   3 -11  -1    0.99    1.96
  -3  11   0    2.54    1.33
  -3  11   0    3.84    1.72
  -3  11   0    1.77    1.43
  -3  11   0    3.97    1.95
   3 -11   0    2.78    1.82
   3 -11   0    4.31    1.97
   3 -11   0    0.16    1.74
   3 -11   0    4.41    1.53
   3 -11   0    1.91    1.26
  -3  11  -1    2.79    1.94
  -3  11  -1    1.04    1.49
  -3  11  -1   -0.07    1.67
   3 -11   1    2.03    2.00
   3 -11   1    0.07    1.26
   3 -11   1   -0.71    1.58
   3 -11   1    0.69    1.76
   3 -11   1    1.64    1.56
  -3  11  -2    1.06    1.54
  -3  11  -2    7.29    1.88
  -3  11  -2    5.90    2.09
   3 -11   2    4.21    1.81
   3 -11   2    4.50    2.21
   3 -11   2    7.71    1.62
  -3  11  -3    1.90    1.89
  -3  11  -3   -1.14    1.42
  -3  11  -3    0.51    2.07
  -3  11  -3   -0.91    1.65
   3 -11   3   -1.21    2.26
   3 -11   3   -0.09    1.75
  -3  11  -4   11.81    1.90
  -3  11  -4   13.51    2.23
  -3  11  -4   11.04    1.63
  -3  11  -4   17.14    2.32
   3 -11   4   13.50    1.92
   3 -11   4   12.72    2.56
  -3  11  -5    1.10    2.09
  -3  11  -5   -0.30    2.38
  -3  11  -5   -1.87    1.56
  -3  11  -5    4.00    1.88
   3 -11   5    2.50    2.62
   3 -11   5    0.79    1.86
  -3  11  -6   16.93    2.66
  -3  11  -6   16.18    2.17
  -3  11  -6   11.99    2.29
  -3  11  -6   15.81    1.86
  -3  11  -6   15.60    2.06
   3 -11   6   12.07    2.10
   3 -11   6   20.31    3.10
  -3  11  -7    1.52    1.66
  -3  11  -7    0.64    2.68
  -3  11  -7    0.13    2.43
  -3  11  -8   -1.80    2.61
  -3  11  -8    2.47    2.95
  -3  11  -9   -4.64    2.82
  -3  11 -10    1.76    3.05
  -3  12  11    4.46    2.66
   3 -12 -11    4.49    3.35
  -3  12  10    7.91    2.51
   3 -12 -10    1.84    2.11
   3 -12 -10    5.80    3.01
  -3  12   9    4.57    2.63
   3 -12  -9    1.79    2.03
   3 -12  -9    3.33    2.75
  -3  12   8   -3.38    2.94
  -3  12   8   -0.05    1.97
   3 -12  -8   -0.99    2.30
   3 -12  -8   -0.46    2.51
   3 -12  -8   -0.55    1.81
  -3  12   7    5.05    2.93
  -3  12   7    3.13    1.95
   3 -12  -7    2.20    2.32
   3 -12  -7    0.03    1.77
   3 -12  -7    8.15    2.19
  -3  12   6    7.27    2.81
  -3  12   6    2.66    1.88
   3 -12  -6    3.97    2.26
   3 -12  -6    5.97    2.12
   3 -12  -6    4.14    1.71
  -3  12   5    0.21    2.47
   3 -12  -5   -2.18    1.97
   3 -12  -5    0.32    1.52
   3 -12  -5    2.26    2.11
  -3  12   4   -1.55    2.42
   3 -12  -4   -0.93    1.97
   3 -12  -4    2.47    2.35
   3 -12  -4    2.00    1.89
   3 -12  -4    2.56    1.56
  -3  12   3    4.34    1.44
  -3  12   3    1.50    1.90
  -3  12   3    3.44    1.54
  -3  12   3    2.98    2.29
   3 -12  -3    1.85    1.80
   3 -12  -3    3.29    1.91
   3 -12  -3    7.06    2.20
   3 -12  -3    4.95    2.12
   3 -12  -3    6.45    1.60
  -3  12   2    1.39    1.55
  -3  12   2    2.60    1.36
  -3  12   2    1.86    1.91
  -3  12   2    0.60    2.20
   3 -12  -2    1.87    1.90
   3 -12  -2    3.21    1.85
   3 -12  -2    1.55    1.49
   3 -12  -2   -1.55    2.21
   3 -12  -2    5.93    2.15
  -3  12   1    0.86    2.09
  -3  12   1    0.97    1.90
  -3  12   1   -1.84    1.58
  -3  12   1   -0.62    1.41
   3 -12  -1    1.97    2.10
   3 -12  -1   -1.99    1.37
   3 -12  -1   -0.27    1.79
   3 -12  -1   -2.71    2.26
   3 -12  -1   -0.47    1.82
  -3  12   0    3.32    2.03
  -3  12   0    4.47    1.61
  -3  12   0    1.97    2.17
  -3  12   0    2.41    1.42
   3 -12   0    6.88    2.10
   3 -12   0    3.48    1.48
   3 -12   0   -0.13    1.81
   3 -12   0    2.18    1.71
   3 -12   0    2.64    2.20
  -3  12  -1   -0.36    1.92
  -3  12  -1    3.98    2.19
  -3  12  -1   -1.20    1.68
  -3  12  -1   -0.01    1.46
   3 -12   1    1.54    1.77
   3 -12   1   -0.68    1.38
   3 -12   1    1.21    1.98
   3 -12   1   -0.31    2.29
  -3  12  -2    7.74    2.04
  -3  12  -2    1.89    2.25
  -3  12  -2    0.51    1.75
   3 -12   2    4.24    1.42
   3 -12   2    3.71    2.45
   3 -12   2    5.91    2.00
  -3  12  -3    2.78    2.40
  -3  12  -3    2.97    2.08
  -3  12  -3    2.57    1.87
   3 -12   3    4.80    2.63
   3 -12   3    2.16    1.99
  -3  12  -4    5.03    2.48
  -3  12  -4    3.52    2.19
  -3  12  -4    6.29    2.03
   3 -12   4    0.77    1.97
   3 -12   4    0.08    2.73
  -3  12  -5    1.16    1.73
  -3  12  -5   -0.58    2.66
  -3  12  -5    2.95    2.22
  -3  12  -5    5.59    2.20
   3 -12   5    1.55    2.80
   3 -12   5    1.62    2.16
  -3  12  -6    5.67    1.73
  -3  12  -6    3.52    2.41
  -3  12  -6    5.51    3.03
  -3  12  -6    0.89    2.25
   3 -12   6    4.85    2.22
  -3  12  -7    2.53    2.60
  -3  12  -7   -0.44    1.80
  -3  12  -7    4.88    3.08
  -3  12  -7    1.45    2.34
  -3  12  -8    5.16    2.87
  -3  12  -8    3.67    3.14
  -3  12  -8    1.72    1.99
  -3  12  -9    5.12    2.98
  -3  12 -10    0.96    3.20
  -3  13  10    4.13    2.60
   3 -13 -10    0.50    3.03
  -3  13   9    0.61    2.39
   3 -13  -9   -0.76    2.21
  -3  13   8    2.48    3.20
   3 -13  -8    0.89    2.11
   3 -13  -8    4.86    2.71
  -3  13   7    8.46    2.27
   3 -13  -7    4.10    2.07
   3 -13  -7    6.56    2.59
  -3  13   6   -2.06    4.11
  -3  13   6    2.54    2.02
   3 -13  -6   -0.47    2.39
   3 -13  -6    3.23    1.95
  -3  13   5   -0.71    2.53
   3 -13  -5    2.17    2.17
   3 -13  -5    6.17    2.79
   3 -13  -5    4.66    1.89
   3 -13  -5    3.32    2.33
  -3  13   4   -0.18    2.56
   3 -13  -4    1.77    1.97
   3 -13  -4   -2.87    2.09
   3 -13  -4   -7.72    2.38
   3 -13  -4    1.62    1.77
   3 -13  -4    4.00    2.52
  -3  13   3   -1.49    2.68
  -3  13   3   -0.60    1.48
  -3  13   3   -0.11    1.75
  -3  13   3    4.23    2.23
   3 -13  -3   -1.61    1.64
   3 -13  -3    1.84    2.50
   3 -13  -3    0.36    2.05
   3 -13  -3   -3.11    2.18
  -3  13   2    8.16    2.60
  -3  13   2    8.21    2.24
  -3  13   2    7.20    1.56
  -3  13   2    0.38    1.77
   3 -13  -2    7.69    2.72
   3 -13  -2    6.10    1.62
   3 -13  -2    7.23    2.09
   3 -13  -2   10.02    2.59
   3 -13  -2   14.26    2.56
  -3  13   1   -0.10    1.78
  -3  13   1    3.60    2.19
  -3  13   1    2.71    2.38
  -3  13   1    2.74    1.55
   3 -13  -1    2.71    2.08
   3 -13  -1    2.80    2.53
   3 -13  -1    2.47    1.60
   3 -13  -1    1.45    1.90
   3 -13  -1    6.79    2.43
  -3  13   0    0.34    1.86
  -3  13   0    3.32    2.21
  -3  13   0    3.02    1.54
  -3  13   0    6.74    2.48
   3 -13   0    6.82    1.97
   3 -13   0   -0.31    1.83
   3 -13   0    7.52    2.60
   3 -13   0    5.00    1.58
   3 -13   0    6.83    2.43
  -3  13  -1    6.12    2.54
  -3  13  -1    6.83    2.00
  -3  13  -1   10.57    2.25
  -3  13  -1    5.50    1.66
   3 -13   1    5.04    2.07
   3 -13   1    9.36    2.38
   3 -13   1    9.91    1.63
   3 -13   1   10.49    2.67
  -3  13  -2    1.75    2.14
  -3  13  -2   -1.76    2.51
  -3  13  -2   -1.57    1.55
  -3  13  -2    0.46    1.91
   3 -13   2    2.71    2.03
   3 -13   2    0.25    1.47
   3 -13   2   -0.45    2.18
   3 -13   2    1.40    2.71
  -3  13  -3    1.36    2.69
  -3  13  -3    4.16    1.98
  -3  13  -3    6.21    2.35
  -3  13  -3    3.89    1.74
   3 -13   3    0.23    2.22
   3 -13   3    6.43    2.90
  -3  13  -4    4.83    2.77
  -3  13  -4    3.64    2.44
  -3  13  -4    8.04    2.10
   3 -13   4    6.26    2.99
   3 -13   4    0.47    2.21
  -3  13  -5   -5.57    2.74
  -3  13  -5    0.65    2.51
   3 -13   5    1.09    2.44
  -3  13  -6    2.29    3.32
  -3  13  -6    0.06    4.83
   3 -13   6   -0.48    2.43
  -3  13  -7    8.08    2.95
  -3  13  -8    1.50    3.05
  -3  13  -9    2.70    3.22
  -3  14   9   -0.27    2.53
   3 -14  -9    2.71    2.96
   3 -14  -9   -3.90    2.38
  -3  14   8    1.29    2.31
   3 -14  -8   -3.54    2.37
   3 -14  -8   -1.17    2.91
  -3  14   7   -2.26    2.34
   3 -14  -6    7.91    2.69
   3 -14  -6    7.86    2.28
   3 -14  -5    1.60    2.39
   3 -14  -5   -2.16    1.96
   3 -14  -4    7.64    1.88
   3 -14  -4    6.40    2.34
   3 -14  -4    4.25    2.78
  -3  14   3    4.83    1.99
  -3  14   3   -3.19    2.35
  -3  14   3   -2.47    1.63
   3 -14  -3   -1.22    2.22
   3 -14  -3    0.19    1.77
   3 -14  -3    3.43    2.63
   3 -14  -3   -4.63    2.83
  -3  14   2    0.10    1.98
  -3  14   2   -0.37    2.36
  -3  14   2   -0.66    1.68
   3 -14  -2   -1.55    2.93
   3 -14  -2    3.80    2.56
   3 -14  -2    2.07    2.85
   3 -14  -2    2.45    2.16
   3 -14  -2    1.02    1.80
  -3  14   1   -3.05    2.31
  -3  14   1   -0.01    1.66
  -3  14   1    0.81    1.91
   3 -14  -1    1.88    1.77
   3 -14  -1    2.00    2.68
   3 -14  -1   -4.72    2.88
   3 -14  -1    1.93    2.08
   3 -14  -1   -1.22    2.10
  -3  14   0   13.80    4.21
  -3  14   0   13.28    2.05
  -3  14   0   13.18    1.86
  -3  14   0   13.97    2.54
   3 -14   0   20.26    3.13
   3 -14   0   19.99    2.80
   3 -14   0   11.61    2.26
   3 -14   0   11.74    1.92
  -3  14  -1    1.49    1.77
  -3  14  -1    3.69    2.58
   3 -14   1    3.90    1.72
   3 -14   1    4.89    2.96
   3 -14   1    2.76    2.56
   3 -14   1    5.32    2.33
  -3  14  -2    9.86    1.89
  -3  14  -2    7.58    2.64
   3 -14   2    8.15    1.79
   3 -14   2    9.03    2.39
   3 -14   2   10.82    2.97
   3 -14   2    8.19    2.57
  -3  14  -3    4.72    2.46
  -3  14  -3    0.71    1.80
   3 -14   3   -4.49    2.54
  -3  14  -4   -1.65    2.58
  -3  14  -4   -2.65    1.84
  -3  14  -5   -4.35    3.52
   3 -14   5    2.94    2.73
  -3  14  -6    4.42    2.87
   3 -14   6    2.61    2.83
  -3  14  -7    0.87    3.05
  -3  14  -8   10.29    3.32
  -3  15   7    2.22    2.45
   3 -15  -7    8.63    2.96
   3 -15  -7    5.98    2.43
  -3  15   6    2.05    2.42
   3 -15  -6   -1.98    2.24
   3 -15  -6    5.77    2.92
   3 -15  -5    6.56    2.21
   3 -15  -5    3.25    2.67
  -3  15   4    4.26    2.20
  -3  15   4    6.08    2.77
  -3  15   4    2.58    1.86
   3 -15  -4    2.01    3.21
   3 -15  -4   -3.23    2.10
   3 -15  -4   -0.99    3.40
  -3  15   3    1.10    1.99
  -3  15   3    4.88    2.83
  -3  15   3    1.29    1.89
   3 -15  -3    3.01    3.41
  -3  15   2    1.69    2.14
  -3  15   2    3.91    2.74
   3 -15  -2   -4.60    3.18
   3 -15  -2    2.13    3.98
   3 -15  -2   -2.53    2.61
  -3  15   1    5.08    2.69
  -3  15   1    2.83    1.84
   3 -15  -1    4.24    1.96
   3 -15  -1    6.37    3.18
  -3  15   0    1.06    2.74
  -3  15   0    3.77    1.95
   3 -15   0    6.08    2.73
   3 -15   0    2.73    1.97
  -3  15  -1   11.91    3.31
  -3  15  -1   12.10    2.95
   3 -15   1   12.03    2.08
   3 -15   1   10.64    3.26
   3 -15   1   11.99    2.82
  -3  15  -2    4.17    2.93
   3 -15   2    5.31    2.52
   3 -15   2    0.47    2.79
   3 -15   2    0.41    1.90
  -3  15  -3    7.96    2.12
   3 -15   3    2.46    2.85
  -3  15  -4   -1.62    2.86
  -3  15  -4    2.39    2.07
   3 -15   4   -8.47    2.83
  -3  15  -5   -1.52    2.08
  -3  15  -5    1.32    2.87
   3 -15   5    2.59    3.11
  -3  15  -6   -0.31    2.20
  -3  15  -6   -0.26    3.09
  -3  16   5    5.15    3.22
   3 -16  -5    4.51    2.90
   3 -16  -5   -0.57    2.27
   3 -16  -4   -1.16    2.28
   3 -16  -4    3.36    2.69
  -3  16   3    7.68    2.54
  -3  16   3   11.85    3.21
   3 -16  -3    4.93    2.23
   3 -16  -3    4.76    2.58
  -3  16   2    2.06    3.08
  -3  16   2   -0.63    1.99
   3 -16  -2   -1.23    2.18
  -3  16   1    5.43    3.12
  -3  16   1    8.86    2.15
   3 -16  -1    4.30    2.25
  -3  16   0    0.23    5.06
  -3  16   0   -0.53    1.97
   3 -16   0    5.61    2.22
  -3  16  -1    3.79    3.37
  -3  16  -1   -0.29    2.08
   3 -16   1   -0.09    2.29
  -3  16  -2    2.84    3.22
  -3  16  -2   -1.83    1.98
   3 -16   2   -0.11    3.08
  -3  16  -3    4.88    3.25
  -3  16  -3    0.19    2.13
  -3  16  -4   -0.70    3.25
  -3  16  -4    0.33    2.18
  -3  17   2   12.81    3.59
  -3  17   2    1.76    2.28
   3 -17  -2    7.39    2.53
  -3  17   1    1.29    2.16
  -3  17   1    6.70    3.65
   3 -17  -1    0.52    2.41
  -3  17   0    3.19    3.40
  -3  17   0   -2.16    2.17
   3 -17   0    0.92    2.40
  -3  17  -1    2.13    3.43
  -3  17  -1    0.20    2.13
   3 -17   1    0.88    2.47
   4  16  -5   -1.01    2.11
   4  16  -5    0.31    3.03
   4  16  -4    3.89    2.98
   4  16  -4    5.86    2.11
   4  16  -3    7.50    2.14
   4  16  -3    9.86    3.01
  -4 -16   2    1.05    2.21
   4  16  -2    4.61    2.90
   4  16  -2   -2.02    1.86
  -4 -16   1    1.09    2.26
   4  16  -1    7.21    2.08
   4  16  -1    8.72    3.09
  -4 -16   0    5.88    2.32
   4  16   0    2.08    2.04
   4  16   0    0.32    2.97
  -4 -16  -1    0.25    2.20
   4  16   1   -0.65    2.08
   4  16   1   -0.39    2.41
  -4 -16  -2    1.46    2.17
   4  16   2    0.68    2.39
   4  16   2    0.34    2.08
  -4 -16  -3    5.18    2.32
   4  16   3   -0.56    2.34
   4  15  -7    7.24    3.05
   4  15  -7    2.48    2.06
   4  15  -6    2.17    2.90
   4  15  -6    5.09    2.03
   4  15  -5    6.29    2.90
   4  15  -5    6.69    2.08
   4  15  -4    1.08    1.88
   4  15  -4    2.04    2.78
  -4 -15   3   -3.74    2.68
   4  15  -3    1.23    2.86
   4  15  -3    0.77    1.92
  -4 -15   2   -2.32    1.93
   4  15  -2    1.01    2.94
   4  15  -2   -1.59    2.02
  -4 -15   1    1.99    2.00
   4  15  -1    4.81    4.47
  -4 -15   0   -0.36    3.06
   4  15   0    1.06    4.51
  -4 -15  -1    6.38    2.31
   4  15   1   11.08    2.31
   4  15   1   10.56    2.09
  -4 -15  -2   -0.18    2.04
   4  15   2    1.54    2.30
   4  15   2    1.11    1.87
  -4 -15  -3   -0.28    2.14
   4  15   3   -0.72    2.37
   4  15   3    2.59    3.33
  -4 -15  -4   -2.73    2.14
   4  15   4    0.64    2.29
  -4 -15  -5    0.63    2.24
   4  15   5   -0.80    2.29
   4  15   6   -2.15    2.40
   4  14  -8   -2.66    2.32
   4  14  -8   -0.12    2.88
   4  14  -7    1.41    2.86
   4  14  -6   13.14    3.77
   4  14  -6   13.37    2.21
   4  14  -5   -0.96    3.01
   4  14  -5   -1.35    1.84
   4  14  -4    6.37    2.57
   4  14  -4    4.11    1.80
  -4 -14   3   -0.78    1.66
  -4 -14   3    4.30    2.64
   4  14  -3   -3.17    1.65
   4  14  -3    1.85    2.49
  -4 -14   2    2.80    1.69
  -4 -14   2   -1.13    2.60
   4  14  -2    0.59    2.37
   4  14  -2    1.46    1.71
  -4 -14   1    0.85    1.82
  -4 -14   1   -1.46    2.32
   4  14  -1    1.66    2.88
   4  14  -1    0.70    1.65
   4  14  -1    5.21    2.36
  -4 -14   0   11.41    1.91
   4  14   0    5.20    2.19
   4  14   0    6.82    2.38
   4  14   0   16.62    3.03
   4  14   0    7.13    1.81
  -4 -14  -1    1.01    1.78
   4  14   1    3.43    2.92
   4  14   1    2.96    2.00
   4  14   1    4.13    1.75
   4  14   1   -2.88    2.02
  -4 -14  -2    3.85    1.89
   4  14   2    7.47    2.09
   4  14   2    5.09    3.02
   4  14   2    5.73    1.77
   4  14   2    4.14    2.09
  -4 -14  -3    1.25    1.96
   4  14   3   -3.85    1.99
   4  14   3    6.18    3.11
   4  14   4   -0.77    2.08
   4  14   4    3.91    3.19
  -4 -14  -5    2.67    2.27
   4  14   5    2.08    2.48
  -4 -14  -6    6.84    2.27
   4  14   6    3.28    2.42
   4  14   6    5.66    3.70
  -4 -14  -7   -4.44    2.24
   4  14   7    4.92    2.60
   4  14   7   -7.55    3.75
   4  13 -10    9.69    3.19
   4  13  -9    0.34    2.03
   4  13  -9    2.22    2.92
   4  13  -8    2.57    1.95
   4  13  -7    4.74    2.62
   4  13  -7    2.10    1.82
   4  13  -6    0.91    1.78
   4  13  -6    5.95    2.51
  -4 -13   5    0.03    4.24
   4  13  -5    2.66    2.73
   4  13  -5    1.12    1.68
   4  13  -5    5.41    2.41
  -4 -13   4   -1.19    2.74
   4  13  -4    0.97    1.59
   4  13  -4    1.06    1.96
   4  13  -4    2.15    2.71
   4  13  -4    0.73    2.30
  -4 -13   3    1.68    2.73
  -4 -13   3    1.94    1.53
   4  13  -3   -0.80    1.96
   4  13  -3    0.81    1.53
   4  13  -3    5.74    2.93
   4  13  -3    3.97    2.23
  -4 -13   2   12.76    2.96
  -4 -13   2   12.88    2.30
  -4 -13   2    8.45    1.63
   4  13  -2   11.67    2.29
   4  13  -2   10.59    1.66
   4  13  -2    9.76    2.03
   4  13  -2   13.23    2.98
  -4 -13   1    1.39    2.77
  -4 -13   1    1.88    1.65
   4  13  -1    0.03    2.11
   4  13  -1   -1.98    1.46
   4  13  -1    5.88    2.86
   4  13  -1    3.57    2.01
  -4 -13   0    0.79    2.85
  -4 -13   0   -0.20    1.59
   4  13   0    2.22    2.70
   4  13   0   -0.13    1.51
   4  13   0    4.73    2.11
   4  13   0    3.09    1.97
  -4 -13  -1   14.52    2.25
  -4 -13  -1   15.55    2.91
  -4 -13  -1   12.27    1.69
   4  13   1   16.24    2.09
   4  13   1   15.86    2.09
   4  13   1   14.74    1.72
   4  13   1   15.55    2.83
  -4 -13  -2   -1.52    2.80
  -4 -13  -2    1.15    1.62
  -4 -13  -2   -4.20    2.04
   4  13   2   -2.70    1.85
   4  13   2   -1.69    1.50
   4  13   2   -0.25    1.93
   4  13   2   -0.17    2.61
  -4 -13  -3    3.40    1.78
  -4 -13  -3    4.39    2.89
  -4 -13  -3    1.08    2.89
   4  13   3    6.52    2.70
   4  13   3    5.60    1.90
   4  13   3    5.45    1.96
   4  13   3    5.47    1.59
  -4 -13  -4    3.14    1.83
  -4 -13  -4    5.46    3.62
   4  13   4   -0.56    2.81
   4  13   4    0.64    1.98
  -4 -13  -5   -1.05    1.89
   4  13   5    0.48    2.07
  -4 -13  -6   -0.94    2.04
   4  13   7    3.94    2.36
  -4 -13  -8   -1.09    2.38
   4  13   8    0.26    2.44
   4  12 -10    3.64    4.95
   4  12  -9    4.21    2.82
   4  12  -8    3.25    2.55
   4  12  -8   -1.83    1.72
   4  12  -8   -0.84    2.30
  -4 -12   7   -0.03    2.76
   4  12  -7   -1.58    1.64
   4  12  -7    2.24    2.39
   4  12  -7    7.56    2.19
  -4 -12   6    5.14    2.82
   4  12  -6    2.65    1.63
   4  12  -6    5.82    2.37
   4  12  -6    9.18    2.15
  -4 -12   5   -2.87    2.68
   4  12  -5    0.14    2.09
   4  12  -5   -1.56    2.00
   4  12  -5    1.50    3.04
   4  12  -5    0.54    1.54
  -4 -12   4    1.30    2.70
   4  12  -4    3.26    2.71
   4  12  -4    0.02    1.86
   4  12  -4    0.39    1.45
   4  12  -4    2.02    2.08
  -4 -12   3    0.05    1.30
  -4 -12   3   -0.17    2.54
   4  12  -3    1.53    1.99
   4  12  -3    0.62    1.73
   4  12  -3    0.66    1.44
   4  12  -3    3.20    2.65
  -4 -12   2   -0.92    1.38
  -4 -12   2   -0.63    2.56
   4  12  -2    1.44    1.42
   4  12  -2    1.09    2.04
   4  12  -2    5.65    2.63
   4  12  -2    0.19    1.74
  -4 -12   1    3.08    1.49
  -4 -12   1    8.46    2.63
   4  12  -1    6.35    2.52
   4  12  -1    2.24    1.95
   4  12  -1    1.11    1.39
   4  12  -1    2.58    1.78
  -4 -12   0    4.53    1.53
  -4 -12   0    6.62    2.58
  -4 -12   0    7.09    1.92
   4  12   0    4.73    2.01
   4  12   0    4.58    1.77
   4  12   0    5.86    1.50
   4  12   0    4.81    2.41
  -4 -12  -1   -0.53    1.39
  -4 -12  -1    2.35    2.65
  -4 -12  -1    1.83    1.89
   4  12   1    1.90    1.36
   4  12   1    3.49    1.73
   4  12   1    1.14    1.65
   4  12   1    6.57    2.41
  -4 -12  -2    0.18    2.74
  -4 -12  -2    1.04    1.48
  -4 -12  -2    0.86    1.99
   4  12   2    5.33    1.69
   4  12   2    2.00    1.41
   4  12   2    2.97    2.35
   4  12   2    1.17    1.80
  -4 -12  -3   -2.34    2.76
  -4 -12  -3    0.68    1.56
  -4 -12  -3   -0.77    2.03
   4  12   3   -0.92    1.58
   4  12   3    4.32    1.85
  -4 -12  -4   -0.39    1.68
  -4 -12  -4   -0.38    2.90
  -4 -12  -4    1.25    2.07
   4  12   4   -0.41    1.85
  -4 -12  -5    5.97    2.94
  -4 -12  -5    4.48    2.07
  -4 -12  -5    3.75    1.92
   4  12   5    4.83    2.02
  -4 -12  -6    2.39    1.98
  -4 -12  -6   -2.21    3.11
   4  12   6    2.23    2.11
  -4 -12  -7    4.20    2.06
   4  12   7    4.87    3.39
  -4 -12  -8    3.87    2.17
   4  12   8    0.56    2.41
  -4 -12  -9   -0.89    2.70
   4  12   9    3.84    2.46
   4  11 -11   -2.66    3.63
   4  11 -10    4.95    2.86
  -4 -11   9    4.58    2.91
   4  11  -9    3.76    2.59
  -4 -11   8   12.59    3.02
   4  11  -8   20.90    2.60
   4  11  -8   18.65    2.38
  -4 -11   7   -1.92    2.61
   4  11  -7    1.49    2.20
   4  11  -7    0.43    1.50
   4  11  -7    3.63    2.04
  -4 -11   6   -1.59    2.42
   4  11  -6   -1.54    1.84
   4  11  -6   -0.13    2.09
   4  11  -6    0.42    1.47
  -4 -11   5   -1.70    2.46
   4  11  -5    0.02    1.42
   4  11  -5    1.17    1.77
   4  11  -5   -0.23    1.94
  -4 -11   4    7.12    2.40
   4  11  -4    8.95    1.49
   4  11  -4    7.75    1.73
   4  11  -4    6.60    1.99
  -4 -11   3   -0.38    1.23
  -4 -11   3    4.24    2.35
   4  11  -3    0.04    1.55
   4  11  -3    2.02    1.91
   4  11  -3    0.00    1.30
   4  11  -3    4.85    2.23
  -4 -11   2   10.77    1.37
  -4 -11   2   11.28    2.33
   4  11  -2   11.67    1.45
   4  11  -2   15.96    2.36
   4  11  -2   13.88    1.66
   4  11  -2   11.83    2.01
  -4 -11   1   -2.25    2.24
  -4 -11   1   -0.66    1.55
  -4 -11   1    0.04    1.30
   4  11  -1   -0.85    1.52
   4  11  -1    0.24    1.27
   4  11  -1    2.20    2.16
   4  11  -1   -0.21    1.70
  -4 -11   0   -2.34    1.29
  -4 -11   0    0.57    1.62
  -4 -11   0    3.06    2.25
   4  11   0    1.69    1.77
   4  11   0    0.50    1.27
   4  11   0    1.52    1.47
   4  11   0    1.87    2.09
  -4 -11  -1   -0.39    1.27
  -4 -11  -1    0.88    2.34
  -4 -11  -1   -1.49    1.64
   4  11   1    1.07    1.61
   4  11   1    0.79    1.28
   4  11   1    1.45    1.46
   4  11   1   -1.30    2.04
  -4 -11  -2   -1.46    1.67
  -4 -11  -2    1.30    1.36
  -4 -11  -2   -0.43    2.34
   4  11   2   -1.16    1.27
   4  11   2   -1.46    1.41
   4  11   2    0.83    1.61
   4  11   2   -2.50    2.10
  -4 -11  -3    2.03    1.81
  -4 -11  -3    6.17    1.48
  -4 -11  -3   11.52    2.45
   4  11   3    5.15    1.74
   4  11   3    7.30    2.13
  -4 -11  -4   17.05    2.72
  -4 -11  -4   15.85    2.07
  -4 -11  -4   15.86    1.78
   4  11   4   17.29    1.98
  -4 -11  -5    1.94    2.04
  -4 -11  -5    2.21    2.75
  -4 -11  -5    1.32    1.68
   4  11   5   -0.14    1.77
  -4 -11  -6   17.55    3.14
  -4 -11  -6    9.15    1.87
  -4 -11  -6    9.04    2.24
   4  11   6    9.38    2.08
  -4 -11  -7   -1.16    3.05
  -4 -11  -7   -0.92    1.77
  -4 -11  -7   -1.30    2.19
   4  11   7   -0.09    1.98
  -4 -11  -8   -2.17    1.93
  -4 -11  -9    0.41    2.10
   4  11   9   -2.18    2.18
  -4 -11 -10   -2.23    2.28
   4  11  10    1.71    2.52
   4  10 -12    2.76    2.84
   4  10 -12   -2.56    3.09
   4  10 -11    0.14    2.75
  -4 -10  10    3.36    3.10
   4  10 -10    0.22    2.55
  -4 -10   9   10.17    2.91
   4  10  -9    6.23    2.44
  -4 -10   8    3.65    2.47
   4  10  -8    1.96    2.20
  -4 -10   7   14.90    2.54
   4  10  -7   16.59    2.33
  -4 -10   6   -2.67    2.19
   4  10  -6   -0.19    1.93
   4  10  -6   -1.89    1.34
   4  10  -6   -2.31    1.62
  -4 -10   5    0.51    2.07
   4  10  -5    1.59    1.82
   4  10  -5    0.03    1.34
   4  10  -5    3.00    1.56
  -4 -10   4   -1.63    2.00
   4  10  -4   -0.18    1.27
   4  10  -4   -0.17    1.76
   4  10  -4    0.17    1.48
  -4 -10   3   20.21    2.24
   4  10  -3   19.22    1.65
   4  10  -3   17.26    1.95
   4  10  -3   20.90    2.02
  -4 -10   2    1.20    1.11
  -4 -10   2    2.25    1.97
   4  10  -2    5.76    1.97
   4  10  -2    2.42    1.24
   4  10  -2    2.80    1.34
   4  10  -2    3.95    1.73
  -4 -10   1   33.07    2.15
  -4 -10   1   37.10    2.48
  -4 -10   1   33.02    3.06
   4  10  -1   38.26    2.33
   4  10  -1   38.43    2.82
   4  10  -1   33.94    2.79
   4  10  -1   35.78    2.16
  -4 -10   0    1.10    1.98
  -4 -10   0    1.19    1.21
  -4 -10   0    0.94    1.45
   4  10   0   -0.55    1.56
   4  10   0    0.51    1.19
   4  10   0   -0.40    1.29
   4  10   0    4.40    1.88
  -4 -10  -1   -1.99    1.40
  -4 -10  -1    2.19    2.03
  -4 -10  -1   -1.12    1.14
   4  10   1    0.91    1.83
   4  10   1   -2.60    1.14
   4  10   1    0.81    1.32
   4  10   1    0.60    1.46
  -4 -10  -2    4.42    2.09
  -4 -10  -2    1.51    1.53
  -4 -10  -2    3.88    1.26
   4  10   2    6.04    1.32
   4  10   2    5.11    1.34
   4  10   2    6.32    1.56
  -4 -10  -3    7.03    1.44
  -4 -10  -3   13.45    2.29
  -4 -10  -3   14.24    1.72
   4  10   3    8.70    1.61
  -4 -10  -4    6.47    2.37
  -4 -10  -4    4.51    1.50
  -4 -10  -4    4.42    1.68
   4  10   4    3.28    1.63
  -4 -10  -5   14.90    1.91
  -4 -10  -5   11.42    1.67
  -4 -10  -5   14.75    2.62
   4  10   5   10.99    1.88
  -4 -10  -6   -0.29    1.90
  -4 -10  -6    3.27    2.62
  -4 -10  -6    1.65    1.59
   4  10   6    0.07    1.77
  -4 -10  -7    5.93    1.73
  -4 -10  -7    7.68    3.01
  -4 -10  -7    4.50    2.08
   4  10   7    2.50    1.97
  -4 -10  -8    7.35    3.23
  -4 -10  -8   -2.19    1.74
   4  10   8   -0.92    1.98
  -4 -10  -9    6.50    5.21
   4  10   9   -1.07    2.76
   4  10  10   -3.09    2.42
   4  10  11    2.22    2.68
   4   9 -13    4.43    2.82
   4   9 -13    1.91    3.09
   4   9 -12    1.33    2.76
   4   9 -12    1.71    2.70
  -4  -9  11   11.30    3.37
   4   9 -11    7.21    2.63
  -4  -9  10   13.06    2.96
   4   9 -10   14.72    2.52
  -4  -9   9   -1.21    2.55
   4   9  -9   -3.81    2.14
  -4  -9   8   17.89    2.44
   4   9  -8   18.62    2.32
  -4  -9   7    7.79    2.16
   4   9  -7    9.82    2.00
  -4  -9   6    0.80    1.92
   4   9  -6   -1.91    1.73
   4   9  -6   -1.58    1.23
  -4  -9   5    6.08    1.96
   4   9  -5    7.94    1.43
   4   9  -5    7.32    1.78
   4   9  -5    7.26    1.32
  -4  -9   4   15.46    1.99
   4   9  -4   16.55    1.52
   4   9  -4   14.90    1.79
   4   9  -4   13.79    1.37
  -4  -9   3    4.17    1.79
   4   9  -3    4.13    1.61
   4   9  -3    4.98    1.19
   4   9  -3    4.57    1.28
  -4  -9   2   20.95    1.74
  -4  -9   2   26.80    2.06
  -4  -9   2   22.52    2.06
   4   9  -2   25.46    2.06
   4   9  -2   23.80    1.94
   4   9  -2   22.63    2.57
  -4  -9   1    2.65    1.06
  -4  -9   1    0.36    1.26
  -4  -9   1    0.11    1.76
   4   9  -1    3.01    1.20
   4   9  -1    4.16    1.66
   4   9  -1    0.84    1.06
   4   9  -1    2.07    1.51
  -4  -9   0    1.17    1.84
  -4  -9   0   -0.36    1.21
  -4  -9   0   -1.18    1.08
   4   9   0    1.31    1.16
   4   9   0   -0.70    1.45
   4   9   0    1.92    1.11
   4   9   0    1.76    1.58
  -4  -9  -1   22.25    1.84
  -4  -9  -1   25.25    2.78
  -4  -9  -1   23.72    2.16
   4   9   1   22.25    2.16
   4   9   1   23.57    1.93
   4   9   1   23.38    1.87
   4   9   1   21.25    2.29
  -4  -9  -2    6.98    1.40
  -4  -9  -2    4.19    1.17
  -4  -9  -2    5.58    1.86
   4   9   2    4.45    1.18
   4   9   2    3.37    1.13
   4   9   2    4.23    1.39
  -4  -9  -3    4.48    1.98
  -4  -9  -3    2.31    1.41
  -4  -9  -3    2.33    1.25
   4   9   3    2.93    1.45
  -4  -9  -4   12.35    1.49
  -4  -9  -4   12.06    2.16
  -4  -9  -4   16.51    1.65
   4   9   4   14.69    1.71
  -4  -9  -5    4.76    1.58
  -4  -9  -5    6.06    2.24
  -4  -9  -5    2.27    1.39
   4   9   5    1.06    1.65
  -4  -9  -6    2.23    2.43
  -4  -9  -6   -0.65    1.48
  -4  -9  -6    0.25    1.68
   4   9   6    0.18    1.64
  -4  -9  -7   10.56    2.76
   4   9   7    6.77    1.84
  -4  -9  -8    8.78    3.09
   4   9   8    6.03    1.95
  -4  -9  -9    5.09    3.23
   4   9   9    1.68    2.15
   4   9  10   12.37    2.51
  -4  -9 -11    3.29    2.67
   4   9  11   -2.34    2.52
   4   8 -13   -2.82    2.95
   4   8 -11    2.69    2.28
   4   8 -11    3.63    2.31
  -4  -8  10   -2.61    2.54
   4   8 -10   -1.19    2.11
  -4  -8   9    1.14    2.32
   4   8  -9    0.60    1.99
  -4  -8   8    4.55    2.04
   4   8  -8    3.64    1.93
  -4  -8   7   13.26    2.02
   4   8  -7   13.64    1.90
  -4  -8   6   30.93    2.84
   4   8  -6   30.86    2.69
  -4  -8   5   -2.66    1.58
   4   8  -5   -1.57    1.21
   4   8  -5   -2.44    1.10
   4   8  -5   -0.38    1.52
  -4  -8   4   11.05    1.76
   4   8  -4   10.92    1.60
   4   8  -4   12.31    1.31
   4   8  -4   11.96    1.25
  -4  -8   3   14.84    1.73
  -4  -8   3   12.82    1.77
   4   8  -3   11.41    1.22
   4   8  -3   12.97    1.25
   4   8  -3   10.66    1.63
  -4  -8   2    2.47    1.18
  -4  -8   2    5.36    1.55
  -4  -8   2    3.35    0.97
   4   8  -2    2.38    1.55
   4   8  -2    4.12    1.10
   4   8  -2    5.26    1.11
  -4  -8   1   19.64    1.66
  -4  -8   1   21.78    1.88
  -4  -8   1   21.77    2.53
   4   8  -1   21.52    1.71
   4   8  -1   23.25    1.77
   4   8  -1   18.36    1.70
  -4  -8   0   30.93    1.88
  -4  -8   0   32.72    2.05
  -4  -8   0   34.53    2.62
   4   8   0   28.92    2.49
   4   8   0   32.94    1.87
   4   8   0   32.67    1.91
   4   8   0   26.86    2.36
  -4  -8  -1    1.64    1.16
  -4  -8  -1   -1.56    1.58
  -4  -8  -1    0.41    0.95
   4   8   1    0.19    1.22
   4   8   1    0.92    1.06
   4   8   1    1.44    1.71
   4   8   1    0.52    0.99
  -4  -8  -2   30.88    2.06
  -4  -8  -2   30.73    2.69
  -4  -8  -2   27.71    1.88
   4   8   2   26.42    1.83
   4   8   2   29.26    1.80
   4   8   2   28.19    2.11
  -4  -8  -3    6.96    1.30
  -4  -8  -3    2.99    1.17
  -4  -8  -3    4.33    1.79
   4   8   3    4.02    1.35
  -4  -8  -4   -1.94    1.17
  -4  -8  -4    1.12    1.32
  -4  -8  -4    3.78    1.88
   4   8   4    2.27    1.40
  -4  -8  -5    0.42    1.30
  -4  -8  -5    0.58    2.01
  -4  -8  -5    1.53    1.46
   4   8   5   -1.65    1.44
  -4  -8  -6    7.10    1.44
  -4  -8  -6    7.20    2.26
   4   8   6    8.55    1.68
  -4  -8  -7    3.90    2.39
   4   8   7    0.73    1.69
  -4  -8  -8    8.30    2.80
   4   8   8    7.60    1.90
  -4  -8  -9    6.78    3.15
   4   8   9   -0.32    2.04
  -4  -8 -10    1.99    3.27
  -4  -8 -10    4.26    3.06
   4   8  10   -1.31    4.00
  -4  -8 -11   -0.40    2.56
   4   8  11    0.71    2.54
  -4  -8 -12    2.72    2.87
   4   8  12    1.29    2.73
   4   7 -13   15.33    2.82
   4   7 -10    1.67    1.78
  -4  -7   9    1.55    2.13
   4   7  -9    4.69    1.82
  -4  -7   8   10.82    1.97
   4   7  -8    6.84    1.77
  -4  -7   7   31.58    2.75
   4   7  -7   33.47    2.73
  -4  -7   6   17.45    1.76
   4   7  -6   15.66    1.70
  -4  -7   5   54.66    2.78
   4   7  -5   48.10    2.20
   4   7  -5   51.42    2.70
  -4  -7   4    1.50    1.47
   4   7  -4    0.53    1.10
   4   7  -4    0.07    1.36
   4   7  -4    0.04    1.01
  -4  -7   3   34.98    2.50
   4   7  -3   37.47    2.44
   4   7  -3   37.96    1.98
   4   7  -3   34.88    1.90
  -4  -7   2    2.40    1.06
  -4  -7   2    2.36    1.65
  -4  -7   2    0.79    0.85
   4   7  -2    2.70    1.00
   4   7  -2    2.46    1.03
   4   7  -2    0.43    1.42
  -4  -7   1    6.10    0.95
  -4  -7   1    7.59    1.64
   4   7  -1    6.08    1.41
   4   7  -1    4.51    1.04
   4   7  -1    7.90    1.07
  -4  -7   0   45.24    2.07
  -4  -7   0   45.64    2.17
  -4  -7   0   49.43    2.65
   4   7   0   48.01    2.53
   4   7   0   44.17    2.11
   4   7   0   45.23    2.03
   4   7   0   48.48    2.10
  -4  -7  -1   28.29    1.83
  -4  -7  -1   31.66    1.92
  -4  -7  -1   34.53    2.52
   4   7   1   34.25    2.01
   4   7   1   29.95    1.98
   4   7   1   31.40    1.84
  -4  -7  -2    6.22    1.05
  -4  -7  -2    6.36    1.18
  -4  -7  -2    6.74    1.57
   4   7   2    7.01    1.00
   4   7   2    7.13    1.23
  -4  -7  -3    6.44    1.23
  -4  -7  -3    8.36    1.68
  -4  -7  -3    5.97    1.09
   4   7   3    8.43    1.32
  -4  -7  -4   -0.79    1.09
  -4  -7  -4   -0.99    1.21
  -4  -7  -4    1.63    1.68
   4   7   4   -1.01    1.34
  -4  -7  -5   -0.54    1.27
  -4  -7  -5   -1.76    1.79
   4   7   5   -0.31    1.38
  -4  -7  -6    5.55    2.09
   4   7   6    5.48    1.53
  -4  -7  -7   15.71    2.18
   4   7   7   14.43    1.83
  -4  -7  -8    0.85    2.22
   4   7   8   -2.04    1.77
  -4  -7  -9    7.83    2.21
  -4  -7  -9    6.28    2.41
   4   7   9    5.11    1.95
  -4  -7 -10    0.22    2.24
   4   7  10    0.35    2.17
  -4  -7 -11   -1.09    2.64
   4   7  11    0.14    2.34
  -4  -7 -12   -1.51    2.56
   4   7  12    0.01    2.55
   4   6 -14   -2.39    2.78
   4   6 -13    0.58    2.35
   4   6  -6   51.78    2.70
  -4  -6   5    5.89    1.41
   4   6  -5    4.40    1.36
  -4  -6   4    3.79    1.37
   4   6  -4    3.24    1.29
   4   6  -4    2.44    1.00
  -4  -6   3   17.63    1.56
   4   6  -3   14.29    1.50
   4   6  -3   17.16    1.20
   4   6  -3   15.02    1.53
  -4  -6   2    0.54    0.80
  -4  -6   2    0.62    1.36
  -4  -6   2   -0.17    0.97
   4   6  -2   -1.00    0.88
   4   6  -2   -0.67    0.98
   4   6  -2   -1.13    1.31
  -4  -6   1    8.96    0.97
  -4  -6   1   10.00    1.10
  -4  -6   1   11.85    1.52
   4   6  -1   10.03    1.41
   4   6  -1   10.07    1.08
   4   6  -1   10.06    1.06
  -4  -6   0  102.26    3.21
  -4  -6   0   94.17    3.15
  -4  -6   0  102.04    3.61
   4   6   0   97.28    3.13
   4   6   0  101.18    3.16
   4   6   0  100.59    3.15
  -4  -6  -1   12.17    1.18
  -4  -6  -1   14.85    1.58
  -4  -6  -1   11.20    1.13
   4   6   1   12.35    1.06
   4   6   1   14.17    1.52
   4   6   1   14.93    1.45
  -4  -6  -2   19.63    1.60
   4   6   2   22.07    1.49
   4   6   2   25.72    1.80
   4   6   2   23.47    1.58
  -4  -6  -3    0.69    0.95
  -4  -6  -3    2.04    1.49
  -4  -6  -3   -0.35    1.13
   4   6   3    0.67    1.21
  -4  -6  -4   -1.25    1.29
  -4  -6  -4    0.44    1.55
  -4  -6  -4    0.97    1.02
   4   6   4   -0.52    1.19
  -4  -6  -5    3.33    1.50
   4   6   5    1.21    1.28
  -4  -6  -6   10.64    1.82
   4   6   6    9.52    1.54
  -4  -6  -7    0.16    1.88
   4   6   7   -0.50    1.53
  -4  -6  -8   17.74    2.36
  -4  -6  -8   11.48    2.01
   4   6   8   13.73    2.00
  -4  -6  -9   10.00    2.04
  -4  -6  -9    3.31    2.46
   4   6   9    7.70    1.94
  -4  -6 -10   -0.32    2.13
   4   6  10    1.76    1.95
  -4  -6 -11   13.57    2.62
  -4  -6 -12   -2.59    2.63
   4   6  12   -4.00    2.47
   4   5 -14   17.71    3.00
   4   5 -13   14.32    2.58
   4   5 -12   -1.00    1.98
   4   5 -11   30.30    2.83
  -4  -5   5   64.60    2.69
  -4  -5   4    6.21    1.30
   4   5  -4    4.56    1.17
  -4  -5   3   15.78    1.40
   4   5  -3   13.54    1.03
   4   5  -3   12.29    1.33
   4   5  -3   15.11    1.13
  -4  -5   2   33.55    2.21
  -4  -5   2   29.93    1.69
  -4  -5   2   30.31    1.55
   4   5  -2   27.63    1.98
   4   5  -2   34.17    1.70
   4   5  -2   31.43    1.65
  -4  -5   1    7.61    1.01
  -4  -5   1    8.46    1.36
  -4  -5   1    6.41    0.91
   4   5  -1    5.95    1.22
   4   5  -1    8.76    1.00
   4   5  -1    8.34    0.95
  -4  -5   0   72.96    2.90
  -4  -5   0   64.86    2.40
  -4  -5   0   73.36    2.52
   4   5   0   70.89    2.44
   4   5   0   70.30    2.39
   4   5   0   70.63    2.46
  -4  -5  -1   32.44    1.70
  -4  -5  -1   29.47    2.25
  -4  -5  -1   35.44    1.78
   4   5   1   31.74    1.68
   4   5   1   34.26    1.63
   4   5   1   29.11    1.65
  -4  -5  -2    1.16    0.98
  -4  -5  -2   -0.69    1.34
  -4  -5  -2    0.55    0.93
   4   5   2    1.13    0.83
   4   5   2   -0.58    0.97
  -4  -5  -3   38.33    1.82
  -4  -5  -3   39.31    2.18
  -4  -5  -3   40.59    1.92
   4   5   3   38.32    2.05
  -4  -5  -4    2.04    1.35
   4   5   4    1.94    1.17
  -4  -5  -5    5.34    1.44
   4   5   5    3.63    1.28
  -4  -5  -6   92.27    3.64
  -4  -5  -6   97.18    3.59
   4   5   6   94.04    3.52
  -4  -5  -7   14.06    1.79
  -4  -5  -7   18.35    2.00
   4   5   7   18.93    1.75
  -4  -5  -8    7.38    2.02
  -4  -5  -8    7.49    1.80
   4   5   8    5.47    1.72
  -4  -5  -9   10.82    2.38
  -4  -5  -9   16.13    2.05
   4   5   9   13.45    1.90
  -4  -5 -10   -1.01    2.30
  -4  -5 -10    4.68    2.15
   4   5  10   -2.49    1.88
  -4  -5 -11    8.88    2.41
   4   5  11    3.55    2.19
  -4  -5 -12    6.92    2.73
   4   5  12    5.40    2.49
  -4  -5 -13    0.70    2.74
   4   5  13    0.70    2.60
   4   4 -14   -1.33    2.65
   4   4 -14   -1.67    2.68
   4   4 -12    9.31    1.99
  -4  -4   4   27.58    1.92
  -4  -4   3   30.34    1.94
   4   4  -3   30.52    1.49
   4   4  -3   26.95    1.82
   4   4  -3   34.68    1.62
  -4  -4   2   -1.83    1.12
  -4  -4   2   -0.21    0.83
  -4  -4   2   -0.50    0.74
   4   4  -2   -0.92    0.84
   4   4  -2   -1.65    0.99
   4   4  -2   -0.26    0.76
  -4  -4   1   92.07    2.92
  -4  -4   1   94.74    2.99
  -4  -4   1   94.69    3.28
   4   4  -1   97.16    2.97
   4   4  -1   98.71    2.99
  -4  -4   0   62.34    2.20
  -4  -4   0   64.79    2.29
  -4  -4   0   63.10    2.60
  -4  -4   0   63.56    2.24
   4   4   0   65.12    2.24
   4   4   0   62.79    2.21
  -4  -4  -1   34.93    1.66
  -4  -4  -1   39.15    1.76
  -4  -4  -1   36.93    1.82
  -4  -4  -1   34.88    2.19
   4   4   1   36.21    1.65
   4   4   1   37.43    1.66
   4   4   1   35.59    1.67
  -4  -4  -2    1.90    1.07
  -4  -4  -2    2.36    0.83
  -4  -4  -2    1.92    0.92
  -4  -4  -2    1.80    1.10
   4   4   2    1.09    0.89
  -4  -4  -3   49.92    2.29
  -4  -4  -3   47.74    1.92
  -4  -4  -3   48.36    2.28
   4   4   3   48.29    2.17
  -4  -4  -4   18.48    1.91
  -4  -4  -4   21.16    1.96
   4   4   4   19.42    1.81
  -4  -4  -5   26.34    2.16
  -4  -4  -5   28.16    2.20
   4   4   5   28.19    2.05
  -4  -4  -6    7.64    1.50
  -4  -4  -6    7.51    1.48
   4   4   6    7.83    1.43
  -4  -4  -7    0.09    1.51
  -4  -4  -7   -3.20    1.57
   4   4   7    1.50    1.44
  -4  -4  -8    8.34    1.75
  -4  -4  -8    8.51    1.91
   4   4   8    8.61    1.64
  -4  -4  -9    4.21    2.16
  -4  -4  -9    2.67    1.91
   4   4   9    3.88    1.70
  -4  -4 -10    1.60    2.31
  -4  -4 -10    1.87    1.97
   4   4  10    3.76    1.89
  -4  -4 -11   11.63    2.31
   4   4  11   10.78    2.20
  -4  -4 -12    2.15    2.61
   4   4  12    0.21    2.40
  -4  -4 -13    4.55    2.64
   4   3 -15    0.19    2.86
   4   3 -14   34.13    3.74
   4   3 -14   30.72    2.99
   4   3 -13    2.97    2.35
   4   3 -13    1.25    2.26
   4   3 -12   -0.67    1.89
   4   3 -11    6.23    1.71
   4   3  -3   19.04    1.28
   4   3  -3   20.25    1.36
  -4  -3   2   51.87    1.95
  -4  -3   2   54.55    1.90
  -4  -3   2   54.01    2.22
   4   3  -2   51.93    1.93
   4   3  -2   51.97    1.96
   4   3  -2   50.67    2.12
  -4  -3   1   52.77    2.24
  -4  -3   1   51.62    1.95
  -4  -3   1   49.93    1.91
   4   3  -1   49.33    1.89
   4   3  -1   53.02    1.94
  -4  -3   0  153.91    4.38
  -4  -3   0  157.47    4.58
  -4  -3   0  153.37    4.36
  -4  -3   0  145.93    4.53
   4   3   0  152.68    4.36
   4   3   0  159.55    4.40
  -4  -3  -1   13.34    1.25
  -4  -3  -1   13.14    1.06
  -4  -3  -1   12.45    1.06
  -4  -3  -1   13.83    1.37
   4   3   1   13.33    1.29
   4   3   1   13.09    1.24
   4   3   1   13.58    1.28
  -4  -3  -2    0.71    0.82
  -4  -3  -2   -0.19    0.98
  -4  -3  -2    0.24    0.99
  -4  -3  -2   -0.50    0.77
   4   3   2    0.37    0.82
  -4  -3  -3   19.18    1.70
  -4  -3  -3   17.58    1.79
   4   3   3   15.67    1.58
  -4  -3  -4   25.57    2.00
  -4  -3  -4   27.53    1.97
   4   3   4   27.04    1.89
  -4  -3  -5   30.41    2.12
  -4  -3  -5   27.34    2.12
   4   3   5   31.61    2.05
  -4  -3  -6  110.22    3.80
  -4  -3  -6  109.21    3.79
   4   3   6  106.26    3.73
  -4  -3  -7    3.60    1.49
  -4  -3  -7    6.28    1.59
   4   3   7    4.03    1.42
  -4  -3  -8   -1.57    1.55
  -4  -3  -8   -1.90    1.69
   4   3   8    0.44    1.50
  -4  -3  -9   -0.33    1.72
  -4  -3  -9    0.21    1.98
   4   3   9   -0.42    1.65
  -4  -3 -10    1.05    2.32
  -4  -3 -10    0.39    1.89
   4   3  10    0.41    1.79
  -4  -3 -11    2.03    2.14
  -4  -3 -12    9.85    2.43
  -4  -3 -13    2.14    2.71
   4   2 -15   11.54    2.67
   4   2 -14    5.04    2.55
   4   2 -14   10.13    2.62
   4   2 -13    4.42    2.30
   4   2 -13    6.61    2.22
   4   2 -12   39.32    3.04
   4   2 -12   37.39    3.08
   4   2 -11    7.97    1.97
   4   2 -10   85.76    3.36
  -4  -2   2    1.61    0.95
  -4  -2   2    1.82    0.76
  -4  -2   2    1.83    0.73
   4   2  -2    2.12    0.77
   4   2  -2    2.26    0.73
  -4  -2   1  246.44    6.74
  -4  -2   1  252.12    6.83
  -4  -2   1  247.46    6.74
   4   2  -1  248.47    6.74
   4   2  -1  240.51    6.73
  -4  -2   0   55.89    2.01
  -4  -2   0   57.69    2.02
   4   2   0   56.72    2.03
   4   2   0   53.38    1.98
   4   2   0   59.38    2.01
  -4  -2  -1   14.72    1.29
  -4  -2  -1   14.27    1.26
  -4  -2  -1   14.12    1.39
  -4  -2  -1   13.52    1.33
   4   2   1   15.51    1.13
   4   2   1   13.26    1.21
   4   2   1   16.07    1.29
  -4  -2  -2   71.99    2.43
  -4  -2  -2   76.53    2.57
  -4  -2  -2   73.59    2.56
  -4  -2  -2   74.06    2.39
   4   2   2   73.71    2.47
  -4  -2  -3   18.68    1.70
  -4  -2  -3   21.06    1.68
   4   2   3   19.75    1.51
  -4  -2  -4   10.26    1.26
  -4  -2  -4    9.89    1.29
   4   2   4   10.70    1.21
  -4  -2  -5   11.36    2.25
  -4  -2  -5   10.79    1.34
   4   2   5    9.58    1.26
  -4  -2  -6    6.00    1.37
  -4  -2  -6    5.29    1.42
   4   2   6    4.36    1.28
  -4  -2  -7   -0.65    1.49
  -4  -2  -7   -0.25    1.35
   4   2   7   -2.57    1.33
  -4  -2  -8    9.35    1.65
  -4  -2  -8    9.19    1.79
   4   2   8    7.86    1.57
  -4  -2  -9    8.08    1.82
  -4  -2  -9    9.04    2.06
  -4  -2 -10   18.15    2.08
  -4  -2 -10   11.90    2.45
  -4  -2 -11    8.83    2.17
  -4  -2 -12    1.72    2.22
   4   1 -15   -1.19    2.63
   4   1 -14   10.58    2.59
   4   1 -13    0.80    2.06
   4   1 -13    2.82    2.07
   4   1 -12    0.64    1.85
   4   1 -12    0.45    1.79
   4   1 -11   -0.30    1.71
   4   1 -10   10.51    1.77
   4   1  -9   34.49    2.40
   4   1  -2    0.16    0.72
   4   1  -2   -0.35    0.72
  -4  -1   1  156.07    4.30
  -4  -1   1  146.01    4.30
  -4  -1   1  153.15    4.29
   4   1  -1  151.28    4.28
   4   1  -1  154.00    4.30
   4   1  -1  155.32    4.30
  -4  -1   0  103.48    3.05
   4   1   0   98.04    3.01
   4   1   0  106.89    3.03
   4   1   0   99.32    3.07
  -4  -1  -1   10.83    0.92
  -4  -1  -1    9.97    1.02
  -4  -1  -1    9.27    0.86
  -4  -1  -1   10.11    0.90
   4   1   1   10.36    0.85
   4   1   1   10.26    0.99
   4   1   1    8.61    0.79
   4   1   1    9.45    0.95
  -4  -1  -2   34.45    1.72
  -4  -1  -2   34.26    1.59
  -4  -1  -2   34.98    1.78
  -4  -1  -2   34.43    1.56
   4   1   2   34.88    1.67
   4   1   2   35.65    1.80
  -4  -1  -3    2.06    1.02
  -4  -1  -3    1.09    1.01
   4   1   3    0.64    1.06
   4   1   3    0.64    0.93
  -4  -1  -4    5.64    1.18
  -4  -1  -4    4.10    1.15
   4   1   4    4.63    1.08
  -4  -1  -5   25.01    1.99
  -4  -1  -5   27.24    2.33
   4   1   5   25.52    1.94
  -4  -1  -6   17.46    1.51
  -4  -1  -6   19.49    2.04
  -4  -1  -7   69.46    3.00
  -4  -1  -7   74.05    3.15
  -4  -1  -8    0.70    1.50
  -4  -1  -8   -0.89    1.60
  -4  -1  -9    3.51    1.97
  -4  -1  -9    1.22    1.71
  -4  -1 -10    0.16    2.18
  -4  -1 -10    1.55    1.94
  -4  -1 -11   10.15    2.68
  -4  -1 -11    8.92    2.22
  -4  -1 -12    5.52    2.31
  -4  -1 -13   23.88    2.95
   4   0 -15    2.44    2.72
   4   0 -15    2.21    2.82
   4   0 -14    9.72    2.63
   4   0 -14   13.55    2.48
   4   0 -13    2.04    2.06
   4   0 -13    1.12    2.12
   4   0 -12   58.27    3.18
   4   0 -12   52.93    3.29
   4   0 -11    0.37    1.70
   4   0 -10   78.10    3.28
   4   0 -10   79.58    3.14
   4   0  -9   -0.95    1.36
   4   0  -8   20.94    1.97
   4   0  -7   -0.76    1.22
   4   0  -6  134.28    4.15
   4   0  -5   -0.25    1.12
   4   0  -4  188.09    5.37
   4   0  -3   -0.68    0.96
  -4   0   2    0.30    0.69
  -4   0   2    0.28    0.83
   4   0  -2    0.93    0.84
   4   0  -2    0.53    0.92
   4   0  -2    1.30    0.72
  -4   0   1   -0.42    0.72
  -4   0   1   -0.24    0.87
  -4   0   1   -0.26    0.70
   4   0  -1    0.32    0.74
   4   0  -1   -0.03    0.77
   4   0  -1    0.42    0.73
   4   0  -1    0.56    0.90
  -4   0   0   69.00    2.26
  -4   0   0   71.62    2.30
   4   0   0   68.54    2.25
   4   0   0   69.95    2.36
   4   0   0   71.43    2.27
  -4   0  -1   -0.08    0.79
  -4   0  -1   -0.09    0.87
  -4   0  -1   -0.27    0.73
  -4   0  -1   -0.04    0.76
   4   0   1   -1.31    0.68
   4   0   1    0.40    0.75
   4   0   1   -0.04    0.89
  -4   0  -2  130.38    3.97
  -4   0  -2  136.26    3.84
  -4   0  -2  135.23    3.94
   4   0   2  132.68    3.97
  -4   0  -3    1.87    1.01
  -4   0  -3    0.49    0.98
   4   0   3   -1.27    1.02
  -4   0  -4   61.60    2.47
  -4   0  -4   59.26    2.48
   4   0   4   60.59    2.48
  -4   0  -5   -1.48    1.46
  -4   0  -5   -0.01    1.20
   4   0   5   -0.52    1.25
  -4   0  -6   -0.19    1.29
  -4   0  -6    0.09    1.25
  -4   0  -7    1.23    1.47
  -4   0  -7   -0.64    1.38
  -4   0  -8   30.62    2.51
  -4   0  -8   26.49    2.59
  -4   0  -9   -0.46    1.68
  -4   0  -9   -2.06    1.83
  -4   0 -10   22.13    2.54
  -4   0 -10   26.50    2.25
  -4   0 -11   -2.66    2.40
  -4   0 -11    0.40    2.00
  -4   0 -12   -1.91    2.29
  -4   0 -13    0.92    2.56
  -4   0 -13   -2.62    3.32
   4  -1 -14    7.59    2.43
   4  -1 -14    7.49    2.62
   4  -1 -13    6.08    2.21
   4  -1 -13    3.88    2.13
   4  -1 -12    1.17    1.87
   4  -1 -12   -1.48    1.94
   4  -1 -11    4.73    1.74
   4  -1 -11    2.55    1.60
  -4   1  10    8.27    1.51
   4  -1 -10   10.02    1.71
   4  -1 -10   10.27    1.52
   4  -1  -9   37.67    2.14
   4  -1  -9   35.22    2.36
  -4   1   8   17.74    1.64
   4  -1  -8   18.95    1.96
   4  -1  -7   26.25    1.96
   4  -1  -6    3.67    1.19
   4  -1  -5    9.58    1.20
   4  -1  -4    5.74    1.05
   4  -1  -3   63.44    2.30
   4  -1  -3   64.47    2.19
  -4   1   2    0.12    0.87
  -4   1   2   -0.16    1.01
  -4   1   2   -0.99    0.70
   4  -1  -2   -0.33    0.83
   4  -1  -2    0.18    0.73
   4  -1  -2    0.05    0.90
   4  -1  -2    0.86    0.71
  -4   1   1  155.59    4.34
  -4   1   1  156.54    4.40
  -4   1   1  149.53    4.33
   4  -1  -1  152.87    4.40
   4  -1  -1  158.06    4.35
   4  -1  -1  152.98    4.34
  -4   1   0   98.05    2.98
  -4   1   0  101.30    3.00
  -4   1   0   97.81    3.10
   4  -1   0  101.65    2.97
   4  -1   0  101.57    3.00
   4  -1   0  100.62    3.08
  -4   1  -1    8.81    0.83
  -4   1  -1    9.14    1.01
  -4   1  -1    9.72    0.88
   4  -1   1    8.71    0.82
   4  -1   1   10.12    1.03
  -4   1  -2   32.73    1.73
   4  -1   2   35.69    1.79
  -4   1  -3    1.68    1.02
  -4   1  -3    2.81    1.01
   4  -1   3    1.56    1.02
  -4   1  -4    6.25    1.15
  -4   1  -4    7.16    1.21
   4  -1   4    3.71    1.14
  -4   1  -5   27.99    2.03
   4  -1   5   28.59    1.98
  -4   1  -6   20.09    2.02
  -4   1  -6   17.58    1.57
   4  -1   6   18.91    2.04
  -4   1  -7   67.15    2.96
  -4   1  -7   70.61    3.06
  -4   1  -8   -2.62    1.46
  -4   1  -8    1.43    1.62
  -4   1  -9    6.40    1.99
  -4   1  -9    5.21    1.71
  -4   1 -10    1.97    1.87
  -4   1 -10   -0.92    2.15
  -4   1 -11    5.32    2.48
  -4   1 -11   11.21    2.16
  -4   1 -12    4.86    2.85
  -4   1 -12   -0.41    2.29
  -4   1 -13   21.74    2.81
  -4   1 -13   23.53    4.21
   4  -2 -15    8.79    2.75
   4  -2 -14    9.18    2.68
   4  -2 -14    8.95    2.51
   4  -2 -13    1.76    2.24
  -4   2  12   36.42    2.93
   4  -2 -12   35.72    3.05
   4  -2 -12   33.36    2.97
  -4   2  11    9.31    1.72
   4  -2 -11    7.61    1.84
   4  -2 -11    8.22    1.74
  -4   2  10   84.24    3.18
   4  -2 -10   75.83    3.32
   4  -2 -10   79.00    3.19
  -4   2   9   12.81    1.37
   4  -2  -9    6.63    1.54
   4  -2  -8    2.02    1.30
  -4   2   7   36.92    1.74
   4  -2  -7   34.62    2.09
   4  -2  -6   46.34    2.20
   4  -2  -5    6.64    1.21
  -4   2   4  240.64    6.65
   4  -2  -4  231.39    6.62
   4  -2  -4  236.40    6.54
  -4   2   3    6.37    1.10
   4  -2  -3    5.91    0.78
   4  -2  -3    7.74    1.11
   4  -2  -3    6.62    0.98
   4  -2  -3    9.69    0.90
  -4   2   2    0.29    0.94
  -4   2   2    0.75    0.74
  -4   2   2    2.21    0.75
  -4   2   2    1.59    1.03
   4  -2  -2    1.35    0.73
   4  -2  -2   -0.51    0.90
   4  -2  -2    1.44    0.93
   4  -2  -2    2.48    0.81
  -4   2   1  240.39    6.55
  -4   2   1  244.46    6.55
  -4   2   1  240.88    6.62
  -4   2   1  241.81    6.60
   4  -2  -1  238.09    6.55
   4  -2  -1  229.56    6.60
   4  -2  -1  240.80    6.54
   4  -2  -1  242.11    6.63
  -4   2   0   54.62    1.95
  -4   2   0   53.11    2.08
  -4   2   0   54.82    1.96
   4  -2   0   54.10    1.92
   4  -2   0   56.26    2.13
   4  -2   0   55.49    1.97
  -4   2  -1   12.92    1.08
  -4   2  -1   13.25    1.19
  -4   2  -1   14.04    1.27
   4  -2   1   13.48    1.17
   4  -2   1   13.84    1.46
   4  -2   1   14.12    1.27
  -4   2  -2   73.68    2.37
  -4   2  -2   69.50    2.52
   4  -2   2   72.30    2.58
  -4   2  -3   19.41    1.67
   4  -2   3   19.86    1.71
  -4   2  -4   10.07    1.23
   4  -2   4   10.99    1.24
  -4   2  -5   10.94    1.40
  -4   2  -5    9.82    1.26
   4  -2   5   11.21    1.33
  -4   2  -6    4.23    1.29
  -4   2  -6    5.26    1.37
   4  -2   6    4.98    1.36
  -4   2  -7    2.60    1.48
  -4   2  -7   -0.47    1.32
   4  -2   7   -0.77    1.43
  -4   2  -8   10.27    1.58
  -4   2  -8    7.39    1.79
  -4   2  -9   11.11    2.11
  -4   2  -9   12.50    1.80
  -4   2 -10   15.22    2.53
  -4   2 -10   14.15    2.00
  -4   2 -10   15.66    2.43
  -4   2 -11    7.08    2.64
  -4   2 -11    6.14    2.09
  -4   2 -11    3.50    3.15
  -4   2 -12   -2.83    2.17
  -4   2 -12    0.78    2.81
  -4   2 -13    2.64    2.56
   4  -3 -14   14.58    2.70
  -4   3  13    1.78    2.09
   4  -3 -13   -5.12    2.21
   4  -3 -13    0.90    2.19
  -4   3  12   -2.95    1.90
   4  -3 -12    3.50    1.99
   4  -3 -12   -5.03    1.87
  -4   3  11    7.90    1.75
   4  -3 -11    1.94    1.69
   4  -3 -11    5.11    1.89
  -4   3  10   13.72    1.66
   4  -3 -10    5.23    1.51
   4  -3 -10   10.62    1.74
  -4   3   9   15.77    1.48
   4  -3  -9   13.52    1.64
  -4   3   8   82.38    2.93
   4  -3  -8   80.16    3.08
  -4   3   7    2.41    1.06
   4  -3  -7    2.80    1.28
  -4   3   6   19.70    1.86
   4  -3  -6   16.14    1.81
  -4   3   5   20.52    1.36
  -4   3   5   21.33    1.83
   4  -3  -5   21.87    1.78
  -4   3   4    6.58    1.25
   4  -3  -4    6.15    1.16
   4  -3  -4    4.78    1.03
  -4   3   3   23.07    1.66
   4  -3  -3   21.41    1.60
   4  -3  -3   22.52    1.31
   4  -3  -3   22.03    1.43
   4  -3  -3   18.20    1.64
  -4   3   2   52.85    1.92
  -4   3   2   52.87    1.92
  -4   3   2   53.47    2.14
  -4   3   2   50.61    2.08
   4  -3  -2   52.05    2.02
   4  -3  -2   52.31    2.05
   4  -3  -2   53.00    1.92
   4  -3  -2   51.56    2.12
  -4   3   1   50.79    1.92
  -4   3   1   51.18    2.05
  -4   3   1   49.55    2.06
  -4   3   1   50.32    1.91
   4  -3  -1   51.93    2.09
   4  -3  -1   51.61    2.00
   4  -3  -1   50.74    1.86
   4  -3  -1   53.36    1.98
  -4   3   0  157.47    4.35
  -4   3   0  150.89    4.45
  -4   3   0  147.62    4.45
  -4   3   0  149.73    4.33
  -4   3   0  152.72    4.39
   4  -3   0  154.65    4.47
   4  -3   0  154.48    4.35
   4  -3   0  154.57    4.32
  -4   3  -1   14.88    1.33
  -4   3  -1   12.67    1.12
  -4   3  -1   13.25    1.22
  -4   3  -1   12.39    1.25
   4  -3   1   13.84    1.20
   4  -3   1   14.70    1.32
   4  -3   1   14.22    1.16
  -4   3  -2    0.46    0.81
  -4   3  -2    0.65    1.00
  -4   3  -2    0.83    0.76
  -4   3  -2   -0.85    1.20
   4  -3   2    0.61    1.01
  -4   3  -3   18.12    1.60
  -4   3  -3   17.12    1.72
   4  -3   3   20.91    1.79
  -4   3  -4   29.31    1.96
   4  -3   4   30.53    1.95
  -4   3  -5   30.05    2.52
  -4   3  -5   32.57    2.05
   4  -3   5   31.28    2.09
  -4   3  -6  111.18    4.05
  -4   3  -6  103.81    3.62
  -4   3  -6  108.35    3.80
   4  -3   6  107.14    3.68
  -4   3  -7    4.93    1.39
  -4   3  -7    4.32    1.55
  -4   3  -7    3.16    1.73
   4  -3   7    6.13    1.48
  -4   3  -8    1.03    1.71
  -4   3  -8    1.09    1.46
  -4   3  -8    0.25    1.92
   4  -3   8   -0.83    1.58
  -4   3  -9   -1.95    2.00
  -4   3  -9    1.06    2.08
  -4   3  -9   -2.44    1.59
  -4   3 -10    2.61    2.28
  -4   3 -10    4.53    1.80
  -4   3 -10   -0.07    2.37
  -4   3 -11    1.69    2.02
  -4   3 -11    4.99    2.61
  -4   3 -12   17.77    3.31
  -4   3 -12   16.49    2.40
  -4   3 -13    2.12    2.40
  -4   3 -13   -1.08    3.52
  -4   4  14    0.96    2.47
   4  -4 -14    1.72    2.41
  -4   4  13    2.71    2.19
   4  -4 -13    4.92    2.21
  -4   4  12    4.22    2.00
   4  -4 -12    3.33    2.08
  -4   4  11    1.19    1.72
   4  -4 -11    0.72    1.81
  -4   4  10    8.94    1.58
   4  -4 -10    8.96    1.77
  -4   4   9    8.59    1.39
   4  -4  -9    7.43    1.64
  -4   4   8   -0.37    1.22
   4  -4  -8   -1.22    1.43
  -4   4   7   35.63    2.05
  -4   4   7   35.04    2.35
   4  -4  -7   37.55    2.25
  -4   4   6    4.67    1.02
  -4   4   6    2.30    1.36
   4  -4  -6    4.38    1.30
  -4   4   5   18.77    1.89
  -4   4   5   16.90    1.50
   4  -4  -5   20.53    1.82
  -4   4   4   26.53    1.89
   4  -4  -4   28.49    1.85
   4  -4  -4   25.93    1.85
  -4   4   3   31.17    1.88
   4  -4  -3   30.54    1.63
   4  -4  -3   32.07    1.52
   4  -4  -3   31.25    1.89
   4  -4  -3   29.74    1.86
  -4   4   2   -0.48    0.82
  -4   4   2   -0.10    1.09
  -4   4   2    0.37    0.77
   4  -4  -2    0.34    0.88
   4  -4  -2   -0.80    1.06
   4  -4  -2   -0.37    0.80
   4  -4  -2   -0.44    1.03
  -4   4   1   92.32    3.09
  -4   4   1   95.55    2.94
  -4   4   1   96.83    2.93
  -4   4   1   93.94    3.06
   4  -4  -1   92.47    3.02
   4  -4  -1   94.43    2.91
   4  -4  -1   92.32    3.12
   4  -4  -1   96.16    3.00
  -4   4   0   64.63    2.33
  -4   4   0   60.60    2.39
  -4   4   0   61.92    2.40
  -4   4   0   60.14    2.23
  -4   4   0   67.09    2.25
   4  -4   0   65.17    2.32
   4  -4   0   67.80    2.29
   4  -4   0   63.21    2.16
   4  -4   0   65.14    2.46
  -4   4  -1   35.67    1.92
  -4   4  -1   34.61    1.68
  -4   4  -1   37.32    1.96
  -4   4  -1   37.20    1.80
  -4   4  -1   36.62    1.70
   4  -4   1   40.58    1.97
   4  -4   1   36.96    1.73
   4  -4   1   37.38    1.78
   4  -4   1   36.82    1.59
  -4   4  -2    0.86    0.83
  -4   4  -2    1.23    1.20
  -4   4  -2    1.68    1.02
  -4   4  -2    1.42    0.89
   4  -4   2    4.48    1.13
  -4   4  -3   46.92    1.86
  -4   4  -3   45.18    2.23
  -4   4  -3   49.00    2.47
   4  -4   3   51.47    2.27
  -4   4  -4   20.39    2.17
  -4   4  -4   19.42    1.84
   4  -4   4   20.11    1.89
  -4   4  -5   22.88    2.35
  -4   4  -5   25.97    2.00
  -4   4  -6    9.08    1.39
  -4   4  -6    6.52    1.67
   4  -4   6   10.00    1.42
  -4   4  -7    1.51    1.40
  -4   4  -7    0.28    1.71
  -4   4  -7    1.29    1.63
   4  -4   7    0.50    1.40
  -4   4  -8    8.47    1.90
  -4   4  -8    6.42    1.60
  -4   4  -8    4.94    1.95
   4  -4   8    8.80    1.71
  -4   4  -9    4.29    2.20
  -4   4  -9    5.81    1.72
  -4   4  -9    6.16    2.13
  -4   4 -10    3.14    2.42
  -4   4 -10    1.20    2.46
  -4   4 -10    3.32    1.84
  -4   4 -11   11.90    2.93
  -4   4 -11   13.88    2.20
  -4   4 -12    0.02    2.27
  -4   4 -12    2.72    3.17
  -4   4 -13    5.81    2.52
  -4   4 -13   11.88    3.56
  -4   5  14   14.42    2.82
   4  -5 -14   14.41    2.65
  -4   5  13   15.25    2.47
   4  -5 -13   14.36    2.52
  -4   5  12    0.48    2.04
   4  -5 -12   -0.81    2.03
  -4   5  11   34.58    2.77
   4  -5 -11   25.26    2.79
  -4   5  10    4.62    1.52
   4  -5 -10    7.03    1.85
  -4   5   9   19.06    1.71
  -4   5   9   19.39    2.20
   4  -5  -9   19.67    1.93
  -4   5   8   52.40    2.90
  -4   5   8   51.06    2.52
   4  -5  -8   51.48    2.68
  -4   5   7    8.00    1.29
  -4   5   7    9.61    1.62
   4  -5  -7    8.08    1.51
  -4   5   6   11.92    1.25
  -4   5   6   14.33    1.66
   4  -5  -6    9.71    1.47
  -4   5   5   65.65    2.73
  -4   5   5   65.01    2.47
   4  -5  -5   61.32    2.65
  -4   5   4    5.79    1.33
   4  -5  -4    4.95    1.00
   4  -5  -4    4.92    1.21
   4  -5  -4    5.22    1.29
  -4   5   3   16.08    1.77
   4  -5  -3   13.08    1.09
   4  -5  -3   13.38    1.38
   4  -5  -3   13.79    1.41
   4  -5  -3   14.21    1.35
  -4   5   2   32.35    1.68
  -4   5   2   31.47    1.94
  -4   5   2   31.42    1.65
   4  -5  -2   33.93    2.01
   4  -5  -2   33.25    1.76
   4  -5  -2   33.89    1.91
   4  -5  -2   31.67    1.67
  -4   5   1    6.35    1.18
  -4   5   1   10.58    1.29
  -4   5   1    7.32    0.96
  -4   5   1    7.91    0.97
   4  -5  -1    8.83    1.21
   4  -5  -1    6.32    0.94
   4  -5  -1    7.70    1.22
   4  -5  -1    9.48    1.06
  -4   5   0   70.92    2.60
  -4   5   0   69.72    2.64
  -4   5   0   70.94    2.44
  -4   5   0   69.09    2.47
   4  -5   0   71.41    2.50
   4  -5   0   70.10    2.41
   4  -5   0   68.97    2.77
   4  -5   0   68.28    2.53
   4  -5   0   70.38    2.67
  -4   5  -1   30.85    1.71
  -4   5  -1   30.85    1.71
  -4   5  -1   32.77    1.98
  -4   5  -1   31.92    1.93
   4  -5   1   30.17    1.62
   4  -5   1   34.79    2.00
   4  -5   1   33.67    1.76
   4  -5   1   31.31    1.86
  -4   5  -2    0.57    0.92
  -4   5  -2   -0.73    0.92
  -4   5  -2    0.03    1.14
  -4   5  -2    2.24    1.27
   4  -5   2    1.43    1.16
  -4   5  -3   39.29    2.38
  -4   5  -3   38.98    1.85
  -4   5  -3   37.95    2.09
  -4   5  -3   40.80    1.90
   4  -5   3   41.12    2.16
  -4   5  -4    2.06    1.36
  -4   5  -4    1.34    1.19
   4  -5   4    1.63    1.27
  -4   5  -5    4.15    1.49
  -4   5  -5    3.35    1.27
   4  -5   5    1.50    1.35
  -4   5  -6   95.38    3.82
  -4   5  -6   91.05    3.38
   4  -5   6   94.39    3.46
  -4   5  -7   16.34    2.03
  -4   5  -7   22.24    2.18
   4  -5   7   22.14    1.82
  -4   5  -8    5.72    1.61
  -4   5  -8    5.96    2.00
  -4   5  -8    6.66    2.06
   4  -5   8    4.89    1.71
  -4   5  -9   17.15    2.44
  -4   5  -9   16.48    2.45
  -4   5  -9   15.33    1.95
   4  -5   9   11.81    2.03
  -4   5 -10    0.73    1.91
  -4   5 -10    0.63    2.54
  -4   5 -10    0.83    2.30
  -4   5 -11    6.36    2.91
  -4   5 -11    1.93    2.08
  -4   5 -12    6.91    2.34
  -4   5 -13    0.18    3.54
  -4   5 -13    4.02    2.54
  -4   6  14    2.70    2.84
   4  -6 -14    2.30    2.62
  -4   6  13    3.15    2.46
   4  -6 -13    1.04    2.43
  -4   6  12    5.68    2.18
   4  -6 -12    5.48    2.34
  -4   6  11    2.47    1.79
   4  -6 -11   -0.81    1.99
  -4   6  10    0.49    1.63
   4  -6 -10   -1.66    1.91
  -4   6   9    6.45    1.57
  -4   6   9    7.94    2.09
   4  -6  -9    6.19    1.86
  -4   6   8    2.03    1.39
  -4   6   8   -1.14    1.78
   4  -6  -8    1.02    1.66
  -4   6   7    3.11    1.34
  -4   6   7    0.78    1.69
   4  -6  -7    2.96    1.52
  -4   6   6   52.36    2.44
  -4   6   6   54.96    2.70
   4  -6  -6   52.15    2.57
  -4   6   5    2.94    1.45
   4  -6  -5    4.63    1.03
   4  -6  -5    4.73    1.40
  -4   6   4    1.34    1.41
   4  -6  -4    1.54    1.33
   4  -6  -4    3.17    1.09
   4  -6  -4    3.62    0.98
   4  -6  -4    0.14    1.24
   4  -6  -3   18.84    1.97
   4  -6  -3   16.75    1.63
   4  -6  -3   14.90    1.49
   4  -6  -3   14.54    1.16
  -4   6   2   -0.14    0.92
  -4   6   2    0.11    0.95
  -4   6   2    1.20    1.23
   4  -6  -2    0.45    0.92
   4  -6  -2   -0.55    0.97
   4  -6  -2    0.84    1.26
   4  -6  -2   -1.92    1.20
  -4   6   1   10.39    1.07
  -4   6   1    9.65    1.06
  -4   6   1   13.88    1.44
   4  -6  -1    9.16    1.32
   4  -6  -1    9.71    1.29
   4  -6  -1    9.26    1.12
   4  -6  -1    8.25    1.05
  -4   6   0  103.51    3.19
  -4   6   0   95.88    3.30
  -4   6   0   95.38    3.34
  -4   6   0   98.58    3.18
  -4   6   0  102.18    3.35
   4  -6   0   96.40    3.45
   4  -6   0   98.83    3.15
   4  -6   0  101.41    3.39
   4  -6   0  102.25    3.24
   4  -6   0   98.81    3.37
  -4   6  -1   13.95    1.18
  -4   6  -1   14.44    1.37
  -4   6  -1   15.86    1.41
  -4   6  -1   14.51    1.15
  -4   6  -1   14.01    1.38
   4  -6   1   13.58    1.19
   4  -6   1   12.89    1.08
   4  -6   1   15.74    1.59
   4  -6   1   11.53    1.43
   4  -6   1   14.41    1.38
  -4   6  -2   24.37    1.93
  -4   6  -2   26.82    1.87
  -4   6  -2   20.19    1.92
  -4   6  -2   22.31    2.11
  -4   6  -2   26.37    1.71
   4  -6   2   28.60    1.99
  -4   6  -3   -1.75    1.18
  -4   6  -3   -0.71    0.97
  -4   6  -3   -0.59    1.28
   4  -6   3    0.82    1.45
  -4   6  -4    0.09    1.40
  -4   6  -4   -1.66    1.18
   4  -6   4    1.37    1.28
  -4   6  -5    2.38    1.58
  -4   6  -5    0.21    1.24
   4  -6   5    3.94    1.43
  -4   6  -6   11.27    1.48
  -4   6  -6   10.92    1.90
   4  -6   6   11.15    1.57
  -4   6  -7    0.56    1.92
  -4   6  -7    0.70    1.50
   4  -6   7    2.59    1.62
  -4   6  -8   13.42    1.79
  -4   6  -8   16.37    2.40
   4  -6   8   18.90    1.96
  -4   6  -9    8.26    1.86
  -4   6  -9    3.17    2.41
  -4   6  -9    8.00    2.47
   4  -6   9    6.96    1.99
  -4   6 -10   -1.09    2.73
  -4   6 -10    2.98    1.94
   4  -6  10    0.98    2.16
  -4   6 -11    9.51    2.22
  -4   6 -11   10.10    3.09
  -4   6 -12    2.82    2.36
  -4   6 -12   -0.56    3.19
  -4   7  13   20.35    2.80
   4  -7 -13   15.89    2.88
  -4   7  12    0.69    2.05
   4  -7 -12   -0.82    2.39
  -4   7  11   17.82    2.12
   4  -7 -11   21.71    2.46
  -4   7  10   -0.10    2.50
  -4   7  10   -3.67    1.72
   4  -7 -10    2.66    2.03
  -4   7   9   -0.41    2.13
  -4   7   9    0.92    1.65
   4  -7  -9    2.32    1.93
  -4   7   8    7.41    1.55
  -4   7   8    5.27    2.01
   4  -7  -8    9.83    1.86
  -4   7   7   35.71    2.30
  -4   7   7   35.72    2.76
   4  -7  -7   33.24    2.54
  -4   7   6   19.05    1.95
  -4   7   6   16.21    1.52
   4  -7  -6   13.62    1.70
  -4   7   5   55.88    2.69
   4  -7  -5   50.80    2.31
   4  -7  -5   52.54    2.59
  -4   7   4   -2.45    1.43
   4  -7  -4    0.79    1.00
   4  -7  -4   -0.08    1.34
   4  -7  -4    0.79    1.38
   4  -7  -4   -0.95    1.10
  -4   7   3   35.85    2.27
  -4   7   3   40.12    1.94
   4  -7  -3   41.60    2.30
   4  -7  -3   36.99    2.23
   4  -7  -3   38.28    2.06
   4  -7  -3   39.26    1.95
  -4   7   2    4.38    1.39
  -4   7   2    4.06    1.07
  -4   7   2    1.45    1.03
   4  -7  -2    2.70    1.38
   4  -7  -2    2.10    1.30
   4  -7  -2    1.45    0.96
   4  -7  -2    3.44    1.07
  -4   7   1    6.20    1.70
  -4   7   1    7.38    1.25
  -4   7   1    8.38    1.30
  -4   7   1    5.78    1.07
   4  -7  -1    5.78    1.04
   4  -7  -1    6.57    1.41
   4  -7  -1    5.19    1.36
   4  -7  -1    5.29    1.14
  -4   7   0   47.94    2.11
  -4   7   0   48.00    2.35
  -4   7   0   47.03    2.40
  -4   7   0   48.38    2.13
   4  -7   0   50.31    2.56
   4  -7   0   45.98    2.36
   4  -7   0   43.88    2.76
   4  -7   0   50.71    2.08
  -4   7  -1   32.65    2.20
  -4   7  -1   29.29    2.07
  -4   7  -1   31.42    1.84
  -4   7  -1   32.86    1.88
  -4   7  -1   31.52    2.36
   4  -7   1   32.20    1.71
   4  -7   1   26.84    2.03
   4  -7   1   29.87    2.54
   4  -7   1   31.32    1.97
   4  -7   1   33.13    2.38
  -4   7  -2    8.26    1.35
  -4   7  -2    5.63    1.14
  -4   7  -2    8.97    1.16
  -4   7  -2    6.77    1.35
  -4   7  -2    8.02    1.48
   4  -7   2   10.58    1.69
   4  -7   2    7.54    1.36
   4  -7   2    7.13    1.39
  -4   7  -3    9.18    1.20
  -4   7  -3    6.29    1.14
  -4   7  -3    7.28    1.46
  -4   7  -3    6.61    1.33
   4  -7   3    8.27    1.45
  -4   7  -4   -1.46    1.28
  -4   7  -4    2.54    1.08
  -4   7  -4   -0.44    1.49
  -4   7  -4   -0.20    1.17
   4  -7   4   -0.19    1.34
  -4   7  -5    1.15    1.59
  -4   7  -5   -1.14    1.33
   4  -7   5    1.15    1.45
  -4   7  -6    5.64    1.78
  -4   7  -6    5.92    1.50
   4  -7   6    5.59    1.59
  -4   7  -7   17.38    1.78
  -4   7  -7   18.28    2.17
   4  -7   7   16.49    1.92
  -4   7  -8   -0.81    1.68
  -4   7  -8   -0.06    2.13
   4  -7   8    1.77    1.85
  -4   7  -9    5.83    2.36
  -4   7  -9   10.59    2.00
   4  -7   9    8.18    2.16
  -4   7 -10    2.04    2.61
  -4   7 -10    0.62    2.02
   4  -7  10    0.82    2.35
  -4   7 -11    1.45    2.23
  -4   7 -12   -0.60    2.38
  -4   7 -12    4.26    3.32
  -4   8  13   -2.38    3.40
   4  -8 -13   -4.34    2.74
  -4   8  12    3.74    2.17
   4  -8 -12    7.09    2.64
  -4   8  11    3.30    2.05
  -4   8  11    3.20    3.13
   4  -8 -11    2.69    2.29
  -4   8  10   -1.47    1.85
  -4   8  10   -2.78    2.71
   4  -8 -10   -1.49    2.04
  -4   8   9    1.81    1.69
  -4   8   9   -2.19    2.37
   4  -8  -9    1.91    2.02
  -4   8   8    3.53    1.59
  -4   8   8    1.96    2.15
   4  -8  -8    3.18    1.89
  -4   8   7   10.80    1.63
  -4   8   7   15.74    2.13
   4  -8  -7   12.09    1.93
  -4   8   6   29.87    2.34
  -4   8   6   27.90    2.71
   4  -8  -6   32.76    2.07
   4  -8  -6   29.00    2.48
  -4   8   5    0.23    1.67
   4  -8  -5   -1.20    1.11
   4  -8  -5   -0.17    1.24
   4  -8  -5    0.44    1.54
   4  -8  -5   -2.00    1.55
  -4   8   4    9.93    1.79
   4  -8  -4   14.28    1.34
   4  -8  -4    9.66    1.20
   4  -8  -4   10.70    1.62
   4  -8  -4    9.79    1.62
  -4   8   3    9.20    1.14
  -4   8   3   11.79    1.21
  -4   8   3   12.45    1.66
   4  -8  -3   11.18    1.50
   4  -8  -3   10.12    1.26
   4  -8  -3   11.21    1.55
   4  -8  -3   13.26    1.35
  -4   8   2    5.25    1.10
  -4   8   2    7.11    1.49
   4  -8  -2    4.33    1.15
   4  -8  -2    5.72    1.43
   4  -8  -2    4.12    1.08
   4  -8  -2    1.83    1.40
  -4   8   1   21.74    1.79
  -4   8   1   20.76    1.79
  -4   8   1   19.14    1.77
  -4   8   1   20.61    2.01
   4  -8  -1   23.45    1.90
   4  -8  -1   20.81    1.72
   4  -8  -1   21.24    2.10
   4  -8  -1   21.60    2.23
   4  -8  -1   22.61    2.18
  -4   8   0   31.00    1.93
  -4   8   0   31.04    1.89
  -4   8   0   30.31    2.20
  -4   8   0   28.64    2.25
   4  -8   0   31.25    1.87
   4  -8   0   35.32    2.04
   4  -8   0   29.85    2.27
   4  -8   0   32.10    2.16
  -4   8  -1    0.39    1.34
  -4   8  -1    0.62    1.10
  -4   8  -1    2.62    1.43
  -4   8  -1   -0.97    1.30
  -4   8  -1    1.27    1.07
   4  -8   1    1.22    1.35
   4  -8   1    0.74    1.20
   4  -8   1   -1.07    1.32
   4  -8   1    0.87    1.58
   4  -8   1    0.71    1.02
  -4   8  -2   29.43    2.25
  -4   8  -2   31.17    1.95
  -4   8  -2   31.44    2.20
  -4   8  -2   24.84    2.41
  -4   8  -2   30.04    2.01
   4  -8   2   32.99    2.27
   4  -8   2   27.63    2.13
   4  -8   2   30.34    2.03
   4  -8   2   25.83    2.64
  -4   8  -3    5.76    1.54
  -4   8  -3    2.87    1.25
  -4   8  -3    3.88    1.17
  -4   8  -3    5.80    1.40
   4  -8   3    4.47    1.44
   4  -8   3    4.72    1.86
  -4   8  -4    0.20    1.57
  -4   8  -4   -0.94    1.19
  -4   8  -4   -1.44    1.28
  -4   8  -4    1.47    1.37
   4  -8   4   -2.02    1.40
  -4   8  -5    0.45    1.47
  -4   8  -5   -0.29    1.28
  -4   8  -5    2.02    1.74
   4  -8   5    0.07    1.56
  -4   8  -6    9.88    1.99
  -4   8  -6    8.62    1.65
   4  -8   6    8.55    1.76
  -4   8  -7    1.08    2.09
  -4   8  -7    0.48    1.69
   4  -8   7   -1.57    1.80
  -4   8  -8   10.80    1.86
  -4   8  -8    9.78    2.42
   4  -8   8    8.40    2.07
  -4   8  -9    0.38    1.93
  -4   8  -9    1.14    2.54
   4  -8   9    2.95    2.12
  -4   8 -10    1.94    2.99
  -4   8 -10    0.29    2.08
   4  -8  10    3.33    2.39
  -4   8 -11    2.49    3.25
  -4   8 -11   -0.06    2.26
   4  -8  11    0.43    2.87
  -4   8 -12   -4.63    3.37
  -4   8 -12   -1.93    2.44
  -4   9  13    6.06    2.75
  -4   9  12   -1.51    2.39
   4  -9 -12    2.78    2.77
  -4   9  11    8.19    3.08
  -4   9  11    6.86    2.25
   4  -9 -11    7.63    2.58
  -4   9  10    7.09    2.02
  -4   9  10    4.15    2.97
   4  -9 -10   10.73    2.36
  -4   9   9    0.25    1.84
  -4   9   9   -1.45    2.70
   4  -9  -9    0.00    2.12
  -4   9   8   15.27    1.92
  -4   9   8   19.58    2.61
   4  -9  -8   14.49    2.18
  -4   9   7    9.06    1.64
  -4   9   7    9.76    2.34
   4  -9  -7   10.53    2.02
  -4   9   6   -1.39    1.47
  -4   9   6   -1.20    2.04
   4  -9  -6    1.28    1.50
   4  -9  -6    1.86    1.34
   4  -9  -6   -0.54    1.74
  -4   9   5    6.86    2.05
   4  -9  -5    8.38    1.83
   4  -9  -5    7.59    1.50
   4  -9  -5    7.01    1.37
   4  -9  -5    7.71    1.82
  -4   9   4   16.25    1.96
   4  -9  -4   13.40    1.68
   4  -9  -4   14.96    1.79
   4  -9  -4   15.88    1.54
   4  -9  -4   11.80    1.35
  -4   9   3    3.97    1.16
  -4   9   3    3.01    1.19
  -4   9   3    2.45    1.64
   4  -9  -3    3.28    1.52
   4  -9  -3    4.19    1.35
   4  -9  -3    3.72    1.61
   4  -9  -3    2.41    1.15
  -4   9   2   22.31    1.93
  -4   9   2   25.84    2.23
  -4   9   2   25.02    2.38
   4  -9  -2   19.67    1.91
   4  -9  -2   20.53    2.29
   4  -9  -2   24.75    2.07
   4  -9  -2   29.41    2.41
   4  -9  -2   23.05    2.54
  -4   9   1    2.89    1.41
  -4   9   1    1.05    1.63
  -4   9   1    2.24    1.17
   4  -9  -1    0.07    1.59
   4  -9  -1    1.57    1.16
   4  -9  -1    3.74    1.54
   4  -9  -1    3.07    1.26
   4  -9  -1    1.85    1.55
  -4   9   0    1.31    1.22
  -4   9   0    0.80    1.39
  -4   9   0    1.39    1.15
  -4   9   0    0.68    1.55
   4  -9   0   -1.19    1.45
   4  -9   0    1.66    1.66
   4  -9   0    0.61    1.09
   4  -9   0    0.22    1.29
   4  -9   0   -0.09    1.45
  -4   9  -1   27.46    2.33
  -4   9  -1   23.76    1.95
  -4   9  -1   25.76    2.04
  -4   9  -1   22.39    2.39
   4  -9   1   21.78    2.21
   4  -9   1   24.72    2.12
   4  -9   1   19.88    1.80
   4  -9   1   22.43    2.35
   4  -9   1   23.41    2.07
  -4   9  -2    4.08    1.33
  -4   9  -2    3.15    1.22
  -4   9  -2    2.97    1.62
  -4   9  -2    6.52    1.70
  -4   9  -2    2.91    1.44
   4  -9   2    4.62    1.11
   4  -9   2    2.96    1.51
   4  -9   2    8.01    1.57
   4  -9   2    4.00    1.31
   4  -9   2    4.01    1.83
  -4   9  -3    3.77    1.26
  -4   9  -3    4.11    1.70
  -4   9  -3    4.12    1.43
  -4   9  -3    4.70    1.67
  -4   9  -3    2.77    1.45
   4  -9   3    5.02    1.57
   4  -9   3    4.95    1.99
  -4   9  -4   14.26    1.46
  -4   9  -4   17.03    1.76
  -4   9  -4   14.87    1.94
  -4   9  -4   14.09    1.66
  -4   9  -4   12.67    1.93
   4  -9   4   16.32    2.38
   4  -9   4   16.96    1.83
  -4   9  -5    4.15    1.86
  -4   9  -5    3.16    1.59
  -4   9  -5    1.23    1.35
  -4   9  -5    2.57    1.94
  -4   9  -5   -0.41    1.54
   4  -9   5    0.87    1.69
  -4   9  -6    1.20    1.44
  -4   9  -6    3.17    1.68
  -4   9  -6    0.35    1.93
   4  -9   6    3.14    1.83
  -4   9  -7   12.93    1.94
  -4   9  -7    7.62    2.27
   4  -9   7    8.00    2.05
  -4   9  -8    7.58    1.94
  -4   9  -8    0.70    2.39
   4  -9   8    7.41    2.22
  -4   9  -9    5.83    2.67
  -4   9  -9    4.99    2.11
   4  -9   9   -2.33    2.29
  -4   9 -10   14.36    2.42
  -4   9 -10   10.92    3.16
   4  -9  10   13.44    2.69
  -4   9 -11    5.41    3.07
  -4   9 -11    6.03    2.46
  -4  10  12   -0.23    2.58
  -4  10  11    0.18    2.30
   4 -10 -11   -1.09    2.64
  -4  10  10    0.65    2.94
  -4  10  10   -1.36    2.20
   4 -10 -10    1.57    2.40
  -4  10   9    9.56    2.98
  -4  10   9    7.23    2.00
   4 -10  -9    6.23    2.33
  -4  10   8    4.27    2.73
  -4  10   8    3.70    1.78
   4 -10  -8    1.49    2.20
  -4  10   7   18.74    1.97
  -4  10   7   17.61    2.62
   4 -10  -7   15.84    2.26
   4 -10  -7   16.38    1.68
  -4  10   6   -1.35    1.68
  -4  10   6    5.19    2.34
   4 -10  -6    0.52    1.67
   4 -10  -6    3.28    1.83
   4 -10  -6    0.34    1.39
  -4  10   5   -1.07    2.11
   4 -10  -5   -1.42    1.94
   4 -10  -5    0.40    1.73
   4 -10  -5    2.01    1.40
   4 -10  -5   -2.33    1.53
  -4  10   4    0.36    1.89
   4 -10  -4   -2.00    1.50
   4 -10  -4    0.48    1.72
   4 -10  -4   -0.33    1.81
   4 -10  -4    0.12    1.34
  -4  10   3   20.86    1.98
  -4  10   3   21.01    2.15
  -4  10   3   22.22    2.08
   4 -10  -3   18.15    2.04
   4 -10  -3   15.20    1.68
   4 -10  -3   20.88    2.02
   4 -10  -3   23.45    2.06
  -4  10   2    1.81    1.88
  -4  10   2    3.41    1.32
  -4  10   2    0.91    1.22
   4 -10  -2    3.29    1.70
   4 -10  -2    4.86    1.74
   4 -10  -2    6.35    1.77
   4 -10  -2    4.70    1.44
   4 -10  -2    4.19    1.31
  -4  10   1   31.73    2.70
  -4  10   1   39.18    2.60
  -4  10   1   35.38    2.30
   4 -10  -1   31.79    2.57
   4 -10  -1   42.27    2.88
   4 -10  -1   35.99    2.22
   4 -10  -1   38.41    2.42
   4 -10  -1   34.15    2.84
  -4  10   0    1.70    1.32
  -4  10   0    0.13    1.77
  -4  10   0   -0.25    1.57
   4 -10   0    3.22    1.17
   4 -10   0    4.76    1.81
   4 -10   0    3.66    1.50
   4 -10   0    1.54    1.59
   4 -10   0    1.93    1.66
  -4  10  -1   -1.63    1.59
  -4  10  -1    1.56    1.76
  -4  10  -1    0.66    1.27
  -4  10  -1    0.09    1.37
   4 -10   1    1.37    1.66
   4 -10   1    3.65    1.47
   4 -10   1   -0.93    1.61
   4 -10   1   -1.33    1.21
   4 -10   1    2.63    1.95
  -4  10  -2    4.20    1.37
  -4  10  -2    6.79    1.52
  -4  10  -2    4.51    1.75
  -4  10  -2    4.98    1.94
   4 -10   2    2.99    1.19
   4 -10   2    4.34    1.46
   4 -10   2    0.30    1.53
   4 -10   2    3.89    2.07
   4 -10   2    5.46    1.67
  -4  10  -3   11.07    1.96
  -4  10  -3   10.65    1.66
  -4  10  -3   10.85    1.99
  -4  10  -3   11.93    1.43
  -4  10  -3   10.27    1.74
   4 -10   3   14.23    2.28
   4 -10   3    9.96    1.80
  -4  10  -4    6.85    2.07
  -4  10  -4    5.56    1.40
  -4  10  -4    3.59    1.72
  -4  10  -4    3.37    1.62
  -4  10  -4    5.95    1.96
   4 -10   4    2.88    2.46
   4 -10   4    3.91    1.83
  -4  10  -5   17.61    1.94
  -4  10  -5   12.08    1.60
  -4  10  -5   16.30    2.28
  -4  10  -5   10.11    1.88
  -4  10  -5   19.03    2.25
   4 -10   5   14.36    2.03
  -4  10  -6    1.13    2.06
  -4  10  -6    1.39    1.51
  -4  10  -6   -2.33    1.87
  -4  10  -6   -0.64    1.83
   4 -10   6   -0.70    1.97
  -4  10  -7    3.57    2.28
  -4  10  -7    3.87    1.95
   4 -10   7    6.62    2.19
  -4  10  -8    2.43    2.04
  -4  10  -8    2.78    2.57
   4 -10   8   -3.09    2.29
  -4  10  -9   -1.32    4.43
   4 -10   9    2.55    2.54
  -4  10 -10   -0.13    2.93
   4 -10  10   -0.63    2.81
  -4  10 -11   -1.96    3.17
  -4  11  11   -0.76    2.50
  -4  11  10    5.45    2.33
   4 -11 -10    3.40    2.67
   4 -11 -10    6.23    2.72
  -4  11   9    1.46    2.04
   4 -11  -9    1.71    2.38
  -4  11   8   16.11    2.13
  -4  11   8   13.65    2.99
   4 -11  -8   14.37    2.33
   4 -11  -8   13.80    2.30
  -4  11   7   -0.51    1.87
  -4  11   7   -0.01    2.66
   4 -11  -7    0.64    1.69
   4 -11  -7    0.05    2.03
   4 -11  -7    1.64    2.16
  -4  11   6   -2.64    2.58
  -4  11   6   -3.12    1.72
   4 -11  -6    1.98    1.62
   4 -11  -6    0.39    2.30
   4 -11  -6    2.22    1.85
   4 -11  -6    0.09    1.99
  -4  11   5    0.14    2.43
   4 -11  -5   -2.94    1.70
   4 -11  -5    1.58    1.96
   4 -11  -5   -0.41    1.54
   4 -11  -5   -1.70    2.09
  -4  11   4    3.44    2.25
   4 -11  -4   10.17    2.17
   4 -11  -4    8.67    1.56
   4 -11  -4    8.47    2.00
   4 -11  -4    7.38    1.79
  -4  11   3    0.96    1.32
  -4  11   3    0.81    2.09
  -4  11   3    0.69    1.44
   4 -11  -3    4.35    2.04
   4 -11  -3   -0.75    1.42
   4 -11  -3   -1.29    1.91
   4 -11  -3   -0.77    1.68
  -4  11   2    8.78    1.55
  -4  11   2    8.51    1.47
  -4  11   2   12.96    1.88
  -4  11   2   10.11    2.20
   4 -11  -2   12.43    2.06
   4 -11  -2    7.66    1.89
   4 -11  -2    9.63    1.47
   4 -11  -2   13.30    1.72
  -4  11   1    0.61    1.33
  -4  11   1   -0.91    1.44
  -4  11   1    1.08    1.80
  -4  11   1   -2.29    1.99
   4 -11  -1   -0.18    1.29
   4 -11  -1    1.37    1.60
   4 -11  -1    1.48    1.93
   4 -11  -1    1.66    2.04
   4 -11  -1    2.17    1.78
  -4  11   0    1.64    1.96
  -4  11   0    1.01    1.71
  -4  11   0   -0.45    1.50
   4 -11   0   -0.03    1.36
   4 -11   0   -1.00    1.71
   4 -11   0   -0.79    2.04
   4 -11   0   -0.30    1.63
   4 -11   0    0.62    1.80
  -4  11  -1    0.86    1.82
  -4  11  -1    2.02    1.99
  -4  11  -1    5.05    1.56
   4 -11   1    1.41    1.83
   4 -11   1   -1.70    1.73
   4 -11   1    1.59    2.15
   4 -11   1    1.87    1.60
   4 -11   1    1.20    1.31
  -4  11  -2    2.19    1.63
  -4  11  -2   -2.33    1.84
  -4  11  -2    0.06    2.10
  -4  11  -2    0.19    1.41
   4 -11   2    1.37    1.32
   4 -11   2   -0.98    1.85
   4 -11   2   -1.95    2.28
  -4  11  -3    5.71    1.55
  -4  11  -3    6.07    2.18
  -4  11  -3    7.07    2.01
  -4  11  -3    7.43    1.80
   4 -11   3    4.75    1.89
   4 -11   3    7.71    2.52
  -4  11  -4   18.55    2.06
  -4  11  -4   16.50    1.77
  -4  11  -4   19.48    2.49
  -4  11  -4   16.06    2.26
   4 -11   4   22.40    2.86
   4 -11   4   17.04    2.16
  -4  11  -5   -1.82    1.94
  -4  11  -5    1.41    1.85
  -4  11  -5    4.33    2.42
  -4  11  -5    0.13    1.53
  -4  11  -5    2.84    2.22
   4 -11   5    6.42    2.96
   4 -11   5    0.00    2.04
  -4  11  -6   12.10    2.08
  -4  11  -6   11.34    1.75
  -4  11  -6   11.45    2.25
  -4  11  -6   12.10    2.47
  -4  11  -6    8.40    2.64
   4 -11   6    3.88    2.17
  -4  11  -7   -0.18    2.43
  -4  11  -7    0.93    2.28
  -4  11  -7   -1.27    2.03
  -4  11  -7   -0.18    2.78
  -4  11  -7    0.77    1.70
   4 -11   7    1.62    2.38
  -4  11  -8    7.72    2.23
   4 -11   8   -2.90    2.50
  -4  11  -9    0.75    2.35
  -4  11  -9   -6.73    2.75
  -4  11 -10   10.92    3.29
  -4  12  10    4.09    2.55
   4 -12 -10    2.53    3.54
  -4  12   9    2.07    2.32
   4 -12  -9    5.62    2.09
   4 -12  -9    4.69    2.71
  -4  12   8    2.25    2.12
   4 -12  -8    2.74    2.61
   4 -12  -8    1.18    1.94
  -4  12   7    2.92    2.99
  -4  12   7    3.83    2.07
   4 -12  -7   -0.26    1.82
   4 -12  -7   -1.58    2.36
   4 -12  -7    0.91    2.09
  -4  12   6    2.51    1.92
  -4  12   6    3.03    2.80
   4 -12  -6    3.02    2.04
   4 -12  -6    4.69    2.36
   4 -12  -6    4.81    2.27
   4 -12  -6    5.33    1.81
  -4  12   5   -1.34    2.60
   4 -12  -5   -0.68    2.08
   4 -12  -5   -3.26    1.61
   4 -12  -5    4.92    2.36
   4 -12  -5   -3.92    1.94
  -4  12   4   -0.27    2.44
   4 -12  -4   -1.58    1.94
   4 -12  -4   -1.62    1.56
   4 -12  -4    0.17    2.26
   4 -12  -4   -1.30    2.09
  -4  12   3    2.15    1.60
  -4  12   3   -0.93    2.30
  -4  12   3   -0.94    1.95
  -4  12   3    0.98    1.40
   4 -12  -3    0.73    1.54
   4 -12  -3    0.34    1.92
   4 -12  -3   -1.37    2.22
   4 -12  -3    2.82    1.90
  -4  12   2    1.53    1.44
  -4  12   2   -1.77    2.23
  -4  12   2    0.86    1.63
   4 -12  -2   -3.91    2.17
   4 -12  -2   -2.06    2.23
   4 -12  -2    1.07    1.48
   4 -12  -2   -2.47    1.81
   4 -12  -2    2.00    1.79
  -4  12   1    2.21    1.65
  -4  12   1   -0.83    2.28
  -4  12   1    4.85    1.52
  -4  12   1    0.37    2.04
   4 -12  -1    5.31    2.23
   4 -12  -1    2.63    2.32
   4 -12  -1    5.42    1.84
   4 -12  -1    3.81    1.55
   4 -12  -1    1.31    1.88
  -4  12   0    8.62    2.06
  -4  12   0    3.80    1.74
  -4  12   0    7.33    1.56
  -4  12   0    5.38    2.24
   4 -12   0    5.32    1.54
   4 -12   0    7.31    1.95
   4 -12   0    5.46    2.01
   4 -12   0    7.56    2.18
   4 -12   0    7.00    2.39
  -4  12  -1    4.12    2.05
  -4  12  -1    3.66    1.78
  -4  12  -1    4.20    2.24
   4 -12   1    3.12    1.87
   4 -12   1    6.13    2.40
   4 -12   1   -1.19    1.79
   4 -12   1    4.39    2.08
   4 -12   1    2.14    1.45
  -4  12  -2    1.30    2.07
  -4  12  -2   -0.38    2.34
  -4  12  -2    3.08    1.86
   4 -12   2    2.08    1.87
   4 -12   2    0.53    2.15
   4 -12   2    0.90    2.65
  -4  12  -3    0.08    2.41
  -4  12  -3    2.39    2.16
  -4  12  -3    2.66    1.97
  -4  12  -3   -0.09    1.58
   4 -12   3   -2.45    2.70
   4 -12   3    3.46    2.11
  -4  12  -4    0.57    1.65
  -4  12  -4   -2.44    2.05
  -4  12  -4   -1.93    2.17
  -4  12  -4   -1.04    2.57
   4 -12   4    2.40    2.23
   4 -12   4    1.16    2.93
  -4  12  -5    2.14    1.77
  -4  12  -5   -1.17    2.11
  -4  12  -5    6.75    2.77
  -4  12  -5    5.49    2.47
   4 -12   5    8.15    3.23
   4 -12   5    8.33    2.37
  -4  12  -6    1.12    2.40
  -4  12  -6    1.26    1.81
  -4  12  -6    1.81    2.51
  -4  12  -6   -3.35    2.86
  -4  12  -6    4.90    2.13
   4 -12   6   -0.06    2.40
  -4  12  -7    4.77    3.08
  -4  12  -7    3.17    1.98
  -4  12  -7    6.26    2.25
   4 -12   7   -0.21    2.59
  -4  12  -8    6.33    2.37
  -4  12  -8    1.53    3.15
  -4  12  -8    2.62    2.89
   4 -12   8    0.53    2.83
  -4  12  -9   -4.17    3.11
  -4  13  10   -3.06    2.59
  -4  13   9   -2.41    2.46
   4 -13  -9    2.89    2.85
   4 -13  -9   -5.74    2.91
  -4  13   8    8.24    4.17
   4 -13  -8    0.63    2.11
  -4  13   7    4.30    2.30
   4 -13  -7    3.63    2.62
   4 -13  -7    4.97    2.07
  -4  13   6    0.12    2.03
   4 -13  -6    3.78    2.45
   4 -13  -6    2.28    1.92
   4 -13  -5    1.52    2.30
   4 -13  -5    1.63    1.87
  -4  13   4    0.92    2.56
   4 -13  -4   -0.62    2.07
   4 -13  -4   -2.14    2.11
   4 -13  -4    0.43    1.80
   4 -13  -4    0.64    2.33
  -4  13   3    5.17    1.87
  -4  13   3    2.42    1.54
  -4  13   3   -0.36    2.44
  -4  13   3    0.85    2.22
   4 -13  -3    1.35    1.70
   4 -13  -3    2.75    2.49
   4 -13  -3    1.71    2.01
   4 -13  -3    0.07    2.59
   4 -13  -3    2.01    2.09
  -4  13   2    9.96    2.33
  -4  13   2   10.13    2.52
  -4  13   2    9.46    1.95
  -4  13   2    9.48    1.68
   4 -13  -2    9.35    2.11
   4 -13  -2    8.92    2.53
   4 -13  -2    9.48    1.76
   4 -13  -2   14.50    2.63
   4 -13  -2    8.18    2.13
  -4  13   1    1.40    2.22
  -4  13   1    1.58    1.85
  -4  13   1   -2.45    2.49
  -4  13   1   -0.48    1.57
   4 -13  -1    2.35    2.44
   4 -13  -1   -0.73    2.58
   4 -13  -1   -2.31    1.60
   4 -13  -1    0.02    2.02
   4 -13  -1    1.58    2.10
  -4  13   0    0.26    2.49
  -4  13   0   -2.15    1.91
  -4  13   0    3.04    1.62
  -4  13   0    1.34    2.26
   4 -13   0    1.72    2.03
   4 -13   0    2.86    2.13
   4 -13   0    1.95    2.72
   4 -13   0    2.52    1.60
   4 -13   0   -2.88    2.36
  -4  13  -1   15.78    2.72
  -4  13  -1   13.73    1.80
  -4  13  -1   11.64    2.00
  -4  13  -1   17.67    2.37
   4 -13   1   16.27    2.26
   4 -13   1   18.51    2.94
   4 -13   1   13.37    1.76
   4 -13   1   18.32    2.53
  -4  13  -2    0.84    2.25
  -4  13  -2    1.86    1.91
  -4  13  -2   -1.95    2.69
   4 -13   2   -3.13    2.35
   4 -13   2   -1.13    2.98
   4 -13   2    5.99    2.19
   4 -13   2    1.24    1.54
  -4  13  -3    6.88    2.75
  -4  13  -3    7.74    2.36
  -4  13  -3    5.61    2.46
   4 -13   3    6.25    2.39
   4 -13   3    4.57    2.86
  -4  13  -4    2.49    2.41
  -4  13  -4    1.03    2.69
   4 -13   4    2.63    2.49
  -4  13  -5    2.83    2.93
  -4  13  -5   -0.06    1.93
  -4  13  -5    1.18    2.59
   4 -13   5   -3.59    2.52
  -4  13  -6    1.34    3.01
  -4  13  -6   -0.60    1.92
   4 -13   6    4.96    2.66
  -4  13  -7    5.80    3.02
  -4  13  -7    3.17    2.23
   4 -13   7    4.94    2.90
  -4  13  -8   -0.79    3.10
  -4  14   8    4.53    2.42
   4 -14  -8   -6.39    2.87
   4 -14  -8   -3.82    2.27
  -4  14   7    0.67    2.35
   4 -14  -7   -0.76    2.79
   4 -14  -7    1.52    2.44
  -4  14   6    9.31    3.75
   4 -14  -6    9.24    4.67
   4 -14  -5    3.28    2.24
   4 -14  -5   -2.58    2.76
   4 -14  -4    4.45    2.00
   4 -14  -4    7.26    2.35
  -4  14   3   -0.54    2.08
  -4  14   3    1.59    1.69
   4 -14  -3    0.68    2.24
   4 -14  -3    1.62    2.92
   4 -14  -3   -2.09    1.85
  -4  14   2    1.53    2.41
  -4  14   2    0.11    1.75
  -4  14   2   -0.73    1.96
   4 -14  -2    0.14    2.67
   4 -14  -2    2.25    1.80
   4 -14  -2   -3.93    2.90
   4 -14  -2   -0.19    2.33
  -4  14   1   -3.14    2.42
  -4  14   1    2.37    1.78
  -4  14   1   -2.06    1.87
   4 -14  -1    1.67    2.16
   4 -14  -1   -1.00    2.95
   4 -14  -1    2.62    1.78
   4 -14  -1    5.37    2.57
   4 -14  -1    1.33    2.56
  -4  14   0    9.78    1.91
  -4  14   0    7.98    2.64
   4 -14   0    9.95    2.29
   4 -14   0    6.46    2.29
   4 -14   0    9.77    1.94
   4 -14   0   10.88    3.21
   4 -14   0    7.25    2.73
  -4  14  -1    0.08    1.76
  -4  14  -1    2.56    2.51
   4 -14   1   -1.29    2.65
   4 -14   1    3.78    2.36
   4 -14   1    3.36    3.01
   4 -14   1    3.66    1.77
  -4  14  -2    4.83    1.88
  -4  14  -2    6.70    2.57
   4 -14   2    8.89    2.49
   4 -14   2    4.45    2.80
   4 -14   2    6.90    1.89
  -4  14  -3   -1.10    2.56
   4 -14   3    0.46    2.71
  -4  14  -4   -4.13    4.62
   4 -14   4    3.33    2.81
  -4  14  -5   -0.89    2.92
   4 -14   5   -1.99    2.86
  -4  14  -6    2.61    3.03
   4 -14   6    1.38    2.98
  -4  14  -7    4.64    3.22
   4 -14   7    1.50    3.08
  -4  15   7    5.42    2.59
   4 -15  -7   -0.26    2.43
   4 -15  -7    2.69    2.97
  -4  15   6   -3.93    2.43
   4 -15  -6    1.24    2.83
   4 -15  -6    0.82    2.33
   4 -15  -5    2.71    2.28
   4 -15  -5    6.76    2.73
   4 -15  -4    3.96    2.19
   4 -15  -4   -0.35    3.50
   4 -15  -4    1.85    2.55
  -4  15   3    1.72    1.89
  -4  15   3    3.27    2.69
   4 -15  -3    5.48    3.41
   4 -15  -3    4.29    2.09
   4 -15  -3    2.06    2.58
  -4  15   2    3.55    2.83
  -4  15   2   -2.22    1.86
   4 -15  -2   -1.33    3.19
   4 -15  -2   -0.13    2.66
   4 -15  -2    2.77    2.86
  -4  15   1    5.06    2.47
  -4  15   1    5.65    2.82
   4 -15  -1    0.88    3.25
   4 -15  -1   -0.65    3.17
  -4  15   0    0.42    2.79
   4 -15   0    0.74    2.04
  -4  15  -1   14.63    3.10
  -4  15  -1    9.78    2.23
   4 -15   1   12.00    2.19
  -4  15  -2    3.04    2.00
  -4  15  -2    2.81    3.34
   4 -15   2   -3.75    4.01
   4 -15   2    0.58    2.02
  -4  15  -3    2.14    2.00
  -4  15  -3    2.31    2.93
   4 -15   3    0.02    3.55
  -4  15  -4   -2.65    2.89
  -4  15  -4   -0.94    2.15
   4 -15   4   -2.55    3.71
  -4  15  -5    4.45    3.18
   4 -15   5   -6.11    4.47
  -4  15  -6    0.47    3.29
   4 -16  -5   -3.27    2.79
   4 -16  -5    0.24    2.37
  -4  16   4    5.42    2.73
   4 -16  -4    1.18    2.75
   4 -16  -4   -1.23    2.32
  -4  16   3    2.37    2.12
  -4  16   3    7.64    3.25
   4 -16  -3   13.09    2.81
   4 -16  -3    5.97    2.26
  -4  16   2    2.07    3.14
  -4  16   2   -2.23    2.10
   4 -16  -2    2.09    2.52
   4 -16  -2    1.48    2.23
  -4  16   1    6.50    3.16
  -4  16   1    7.23    2.14
   4 -16  -1    4.48    2.31
  -4  16   0    5.39    2.06
   4 -16   0    2.10    2.33
  -4  16  -1    0.81    3.24
  -4  16  -1    1.34    2.11
   4 -16   1    2.63    2.29
  -4  16  -2    2.34    3.41
  -4  16  -2    1.12    2.12
   4 -16   2    3.26    2.66
  -4  16  -3    5.86    3.31
  -4  16  -3    3.72    2.16
  -4  16  -4   -3.45    3.29
   5  16  -4    1.54    2.08
   5  16  -4    5.26    2.98
  -5 -16   3   -0.47    2.31
   5  16  -3    0.98    2.06
   5  16  -3    5.18    3.04
  -5 -16   2   -3.76    2.22
   5  16  -2   -3.07    2.03
   5  16  -2   -0.94    2.85
  -5 -16   1    0.55    2.36
   5  16  -1    2.63    2.83
   5  16  -1   -1.55    2.04
  -5 -16   0    1.57    2.31
   5  16   0    4.80    2.14
   5  16   0   -0.85    3.00
  -5 -16  -1    0.45    2.32
   5  16   1    0.01    2.47
   5  16   1   -1.01    2.13
  -5 -16  -2    4.15    2.49
   5  16   2   -0.40    2.36
   5  16   2   -0.85    2.20
   5  15  -7    3.38    3.11
   5  15  -6    2.62    2.86
   5  15  -6   -2.56    2.02
   5  15  -5    5.59    2.92
   5  15  -5    6.22    2.06
   5  15  -4    0.75    1.97
   5  15  -4    8.96    2.94
   5  15  -3    1.20    1.87
   5  15  -3   -0.03    2.67
  -5 -15   2    0.80    2.02
   5  15  -2   -3.45    2.71
   5  15  -2   -0.99    1.93
   5  15  -1    0.61    2.70
   5  15  -1   -0.49    1.88
  -5 -15   0   -1.47    2.10
   5  15   0    1.17    1.93
   5  15   0   -3.21    2.23
  -5 -15  -1    7.24    2.18
   5  15   1    2.25    2.44
   5  15   1    5.11    2.27
  -5 -15  -2   -1.15    2.19
   5  15   2    3.07    2.75
  -5 -15  -3    5.57    2.29
   5  15   3    2.72    2.35
  -5 -15  -4   -0.92    2.21
   5  15   4   -0.46    2.37
  -5 -15  -5    1.59    2.31
   5  15   5   -0.19    2.40
   5  14  -8   -2.53    2.05
   5  14  -8   -1.35    3.02
   5  14  -7   -2.80    1.93
   5  14  -7    1.05    2.92
   5  14  -6   13.41    3.06
   5  14  -6    9.98    2.81
   5  14  -4   11.00    2.25
   5  14  -4    9.57    3.18
  -5 -14   3   -0.52    2.77
   5  14  -3    1.67    1.81
   5  14  -3   -0.10    2.39
  -5 -14   2    0.06    1.78
  -5 -14   2    0.06    2.51
   5  14  -2    1.02    1.75
   5  14  -2    0.60    2.50
  -5 -14   1   -1.03    1.79
   5  14  -1    2.92    2.45
   5  14  -1    1.09    1.73
  -5 -14   0    6.48    1.96
   5  14   0    8.47    3.05
   5  14   0    5.52    1.79
   5  14   0    6.14    2.03
  -5 -14  -1    2.18    1.95
   5  14   1   -0.73    3.03
   5  14   1   -2.90    3.24
   5  14   1   -0.31    2.00
   5  14   1    0.77    1.79
  -5 -14  -2    5.92    3.02
   5  14   2    7.78    3.12
   5  14   2    3.15    1.83
   5  14   2    1.21    2.04
   5  14   2    6.19    2.08
  -5 -14  -3   -1.10    2.78
   5  14   3   -4.79    3.13
   5  14   3   -0.61    2.11
  -5 -14  -4   -2.13    2.02
   5  14   4    7.66    3.42
  -5 -14  -5    2.17    2.25
   5  14   5    1.88    2.33
  -5 -14  -6    0.59    2.28
   5  14   6   -2.11    2.48
   5  13  -9   -1.93    2.68
   5  13  -9    1.66    2.96
   5  13  -8    5.46    2.02
   5  13  -7    1.03    2.69
   5  13  -7    2.56    1.84
   5  13  -6   -2.17    1.78
   5  13  -6    2.38    2.58
   5  13  -5    5.25    1.77
   5  13  -5    1.22    2.53
  -5 -13   4   -1.96    4.22
   5  13  -4    0.01    1.61
   5  13  -4    0.01    2.33
  -5 -13   3   -0.05    1.56
  -5 -13   3    1.53    2.93
   5  13  -3    5.15    2.84
   5  13  -3    1.79    1.61
   5  13  -3    6.88    2.31
   5  13  -3    2.69    2.33
  -5 -13   2    7.08    2.87
  -5 -13   2    5.07    1.60
   5  13  -2   12.62    3.04
   5  13  -2    6.15    2.02
   5  13  -2    6.24    2.26
   5  13  -2    5.38    1.65
  -5 -13   1    1.41    1.67
  -5 -13   1    4.07    2.81
   5  13  -1    2.73    2.13
   5  13  -1    0.87    3.00
   5  13  -1    3.06    1.57
   5  13  -1    0.28    1.91
  -5 -13   0    0.40    2.10
  -5 -13   0    0.14    1.70
  -5 -13   0    0.43    2.76
   5  13   0   -0.56    1.55
   5  13   0    0.88    2.88
   5  13   0    2.37    2.00
   5  13   0   -0.41    1.79
  -5 -13  -1   11.62    3.06
  -5 -13  -1   17.77    1.97
  -5 -13  -1   16.78    2.28
   5  13   1   15.13    2.09
   5  13   1   16.40    2.17
   5  13   1   21.41    3.01
   5  13   1   11.89    1.80
  -5 -13  -2   -0.38    1.76
   5  13   2    1.76    1.64
   5  13   2   -0.35    2.77
   5  13   2   -0.04    1.93
   5  13   2    5.69    2.06
  -5 -13  -3    1.01    1.78
   5  13   3    1.88    1.97
  -5 -13  -4    3.10    1.93
   5  13   4   -1.59    2.03
  -5 -13  -5    0.28    2.11
   5  13   5   -1.85    2.18
  -5 -13  -6    3.30    3.40
   5  13   6    0.23    2.34
  -5 -13  -7   10.24    2.40
   5  13   7    4.76    2.40
   5  12  -9    1.36    1.91
   5  12  -9    4.40    2.77
   5  12  -8   -1.52    2.54
   5  12  -8   -1.99    1.76
  -5 -12   7    8.10    2.96
   5  12  -7    6.89    2.37
   5  12  -7    3.49    1.72
   5  12  -7    0.70    2.45
  -5 -12   6    6.56    2.82
   5  12  -6    8.58    2.44
   5  12  -6    7.78    1.73
   5  12  -6    6.24    2.11
  -5 -12   5    5.02    2.85
   5  12  -5   -1.93    2.00
   5  12  -5   -2.67    2.20
   5  12  -5    2.65    1.58
  -5 -12   4    1.62    2.72
   5  12  -4    5.12    1.57
   5  12  -4    7.67    2.84
   5  12  -4    6.14    2.21
   5  12  -4    2.32    1.92
  -5 -12   3   -0.04    2.77
  -5 -12   3   -1.03    1.39
   5  12  -3    5.22    2.67
   5  12  -3   -1.29    1.41
   5  12  -3    1.87    2.10
   5  12  -3   -0.07    1.87
  -5 -12   2    5.32    2.70
  -5 -12   2    2.66    1.47
   5  12  -2    3.86    2.68
   5  12  -2    2.95    2.05
   5  12  -2    1.10    1.43
   5  12  -2    4.96    1.88
  -5 -12   1   10.71    1.97
  -5 -12   1    8.26    1.58
  -5 -12   1    8.59    2.75
   5  12  -1    4.00    2.67
   5  12  -1    6.08    2.02
   5  12  -1    8.07    1.92
   5  12  -1    8.52    1.50
  -5 -12   0    1.84    1.55
  -5 -12   0    1.80    1.98
  -5 -12   0    2.80    2.68
   5  12   0    3.58    1.78
   5  12   0    3.86    1.89
   5  12   0    6.60    2.64
   5  12   0    3.18    1.42
  -5 -12  -1   -0.76    2.73
  -5 -12  -1   -0.32    2.01
  -5 -12  -1    2.05    1.63
   5  12   1   -0.17    1.47
   5  12   1    0.07    2.45
   5  12   1    1.45    1.76
   5  12   1    2.97    1.79
  -5 -12  -2    4.57    2.15
  -5 -12  -2    6.05    2.94
  -5 -12  -2    6.20    1.67
   5  12   2    5.21    1.83
   5  12   2    6.26    2.55
   5  12   2    5.41    1.49
   5  12   2    5.77    1.82
  -5 -12  -3    1.35    1.60
  -5 -12  -3   -3.54    1.98
  -5 -12  -3    1.87    2.80
   5  12   3    1.88    1.86
  -5 -12  -4    6.41    2.88
  -5 -12  -4    3.00    2.29
  -5 -12  -4    2.83    1.79
   5  12   4    2.47    1.92
  -5 -12  -5   10.57    1.98
   5  12   5    8.80    2.18
  -5 -12  -6   -1.51    1.90
   5  12   6    1.91    2.13
  -5 -12  -7   -1.09    2.06
   5  12   7    3.78    2.43
   5  12   8    0.60    2.30
   5  11 -11   -4.67    3.19
   5  11 -10    7.12    2.81
  -5 -11   9   -1.67    2.83
   5  11  -9    2.12    2.56
  -5 -11   8   16.35    3.06
   5  11  -8   14.34    1.79
   5  11  -8   17.00    2.59
  -5 -11   7   -1.88    2.74
   5  11  -7   -2.00    1.56
   5  11  -7   -2.41    2.08
   5  11  -7    0.23    2.24
  -5 -11   6   -2.30    2.60
   5  11  -6    3.32    1.56
   5  11  -6    2.50    1.95
   5  11  -6    2.24    2.20
  -5 -11   5   -0.66    2.52
   5  11  -5   -1.63    2.10
   5  11  -5    0.25    1.81
   5  11  -5   -0.46    1.43
  -5 -11   4    0.35    2.44
   5  11  -4    2.96    1.45
   5  11  -4   -0.07    1.95
   5  11  -4    0.23    1.72
  -5 -11   3    0.06    1.31
  -5 -11   3    1.31    2.38
   5  11  -3   -1.22    1.86
   5  11  -3   -0.26    1.68
   5  11  -3    1.36    2.35
   5  11  -3   -0.63    1.36
  -5 -11   2   13.77    1.51
  -5 -11   2   16.30    2.54
  -5 -11   2   13.61    1.81
   5  11  -2   23.94    2.59
   5  11  -2   13.91    1.75
   5  11  -2   15.93    1.61
   5  11  -2   13.84    2.11
  -5 -11   1   -0.93    2.25
  -5 -11   1   -0.33    1.69
  -5 -11   1   -1.05    1.33
   5  11  -1    5.02    2.22
   5  11  -1   -1.06    1.86
   5  11  -1   -0.31    1.58
   5  11  -1    1.38    1.37
  -5 -11   0    1.17    2.38
  -5 -11   0    3.15    1.75
  -5 -11   0    3.57    1.41
   5  11   0    4.94    2.24
   5  11   0    4.51    1.38
   5  11   0    4.97    1.63
   5  11   0    6.55    1.64
  -5 -11  -1    7.85    1.86
  -5 -11  -1    8.23    1.58
  -5 -11  -1    9.56    2.59
   5  11   1    9.40    1.73
   5  11   1    9.88    1.53
   5  11   1   12.70    2.28
   5  11   1    7.99    1.65
  -5 -11  -2    1.11    1.52
  -5 -11  -2    2.61    2.47
  -5 -11  -2    1.66    1.83
   5  11   2    0.31    1.61
   5  11   2    0.89    1.37
   5  11   2   -3.15    1.52
   5  11   2    2.80    2.23
  -5 -11  -3    4.26    2.59
  -5 -11  -3    2.10    1.97
  -5 -11  -3   -0.47    1.43
   5  11   3   -1.24    1.73
  -5 -11  -4   11.33    2.12
  -5 -11  -4   10.48    2.89
  -5 -11  -4    7.07    1.65
   5  11   4    5.59    1.88
  -5 -11  -5    2.15    2.10
  -5 -11  -5   -0.73    1.64
  -5 -11  -5   -0.56    2.97
   5  11   5    2.35    2.00
  -5 -11  -6   10.86    1.88
  -5 -11  -6    6.52    2.21
  -5 -11  -6   16.31    3.01
   5  11   6    8.29    2.11
  -5 -11  -7    7.18    1.97
   5  11   7    5.60    2.16
  -5 -11  -8    3.15    2.04
   5  11   8    3.93    2.33
  -5 -11  -9   -1.23    2.19
   5  11   9    1.16    2.32
   5  10 -12    1.56    3.00
  -5 -10  11    0.80    3.56
   5  10 -11    2.11    2.86
  -5 -10  10    2.87    3.16
   5  10 -10    3.88    2.62
  -5 -10   9    3.46    2.89
   5  10  -9    2.62    2.37
  -5 -10   8    0.20    2.59
   5  10  -8    1.72    2.16
  -5 -10   7    6.79    2.48
   5  10  -7    4.64    1.48
   5  10  -7    3.61    2.10
   5  10  -7    3.47    1.82
  -5 -10   6   -0.27    2.30
   5  10  -6    0.52    1.40
   5  10  -6    0.63    1.96
   5  10  -6    1.03    1.67
  -5 -10   5    0.46    2.22
   5  10  -5    0.89    1.93
   5  10  -5    0.00    1.37
   5  10  -5    1.36    1.62
  -5 -10   4    6.56    2.19
   5  10  -4    4.08    1.39
   5  10  -4    3.56    1.88
   5  10  -4    6.23    1.57
  -5 -10   3    3.64    2.16
   5  10  -3    4.28    1.26
   5  10  -3    2.78    1.87
   5  10  -3    1.50    1.48
  -5 -10   2    4.83    1.51
  -5 -10   2    2.68    1.21
  -5 -10   2    5.76    2.14
   5  10  -2    3.67    1.49
   5  10  -2    3.02    1.79
   5  10  -2    4.63    1.29
  -5 -10   1   13.11    1.68
  -5 -10   1   11.03    1.37
  -5 -10   1   13.32    2.28
   5  10  -1   15.76    1.58
   5  10  -1   21.36    2.17
   5  10  -1   12.14    1.86
   5  10  -1   13.28    1.40
  -5 -10   0    4.70    1.56
  -5 -10   0    5.29    2.18
  -5 -10   0    4.77    1.29
   5  10   0    4.64    1.29
   5  10   0    5.16    1.41
   5  10   0    5.28    1.49
   5  10   0    9.14    2.03
  -5 -10  -1    0.26    2.06
  -5 -10  -1   -2.31    1.32
  -5 -10  -1   -0.31    1.58
   5  10   1   -1.03    1.98
   5  10   1    2.62    1.38
   5  10   1   -1.52    1.45
   5  10   1   -0.58    1.29
  -5 -10  -2    9.16    1.70
  -5 -10  -2    6.51    1.44
  -5 -10  -2   11.79    2.29
   5  10   2    6.65    1.46
   5  10   2    9.34    1.58
   5  10   2    8.23    1.37
  -5 -10  -3    6.83    2.36
  -5 -10  -3    1.86    1.72
  -5 -10  -3    1.94    1.34
   5  10   3    4.90    1.59
  -5 -10  -4    0.40    1.46
  -5 -10  -4    0.09    2.44
  -5 -10  -4   -2.35    1.75
   5  10   4    0.21    1.69
  -5 -10  -5   23.63    2.18
  -5 -10  -5   22.84    2.90
  -5 -10  -5   15.48    1.81
   5  10   5   20.20    2.12
  -5 -10  -6    3.13    1.68
  -5 -10  -6    1.89    2.07
  -5 -10  -6    3.74    2.95
   5  10   6   -2.74    1.82
  -5 -10  -7    7.49    3.01
  -5 -10  -7    2.83    2.23
  -5 -10  -7    1.20    1.70
   5  10   7   -2.33    1.93
  -5 -10  -8    4.40    1.86
   5  10   8    6.61    2.16
  -5 -10  -9    3.60    2.04
  -5 -10  -9    2.51    2.62
   5  10   9    1.39    2.34
  -5 -10 -10   -0.88    2.12
  -5 -10 -10    3.60    2.69
   5  10  10    6.27    2.61
  -5  -9  12   13.73    3.60
   5   9 -12    1.98    2.95
  -5  -9  10    3.03    2.98
   5   9 -10    8.04    2.50
  -5  -9   9    5.14    2.58
   5   9  -9    2.31    2.24
  -5  -9   8   30.19    2.66
   5   9  -8   29.73    3.22
  -5  -9   7    2.71    2.15
   5   9  -7    4.87    1.91
  -5  -9   6    9.54    2.16
   5   9  -6   13.53    1.64
   5   9  -6   11.59    1.46
   5   9  -6    9.89    1.95
  -5  -9   5   14.34    2.13
   5   9  -5   16.05    1.48
   5   9  -5   15.51    2.00
   5   9  -5   18.83    1.67
  -5  -9   4   -0.78    1.90
   5   9  -4    0.68    1.68
   5   9  -4    0.30    1.21
   5   9  -4    0.19    1.35
  -5  -9   3   17.71    2.08
   5   9  -3   15.62    1.92
   5   9  -3   12.98    1.32
   5   9  -3   11.49    1.46
  -5  -9   2   36.04    2.11
  -5  -9   2   38.32    3.04
  -5  -9   2   42.69    2.43
   5   9  -2   39.97    2.22
   5   9  -2   39.17    2.79
   5   9  -2   39.37    2.36
  -5  -9   1    1.44    1.90
  -5  -9   1    3.51    1.35
  -5  -9   1    2.90    1.13
   5   9  -1    0.18    1.24
   5   9  -1   -0.92    1.56
   5   9  -1    0.90    1.11
  -5  -9   0   23.82    2.22
  -5  -9   0   21.16    1.66
  -5  -9   0   19.65    1.94
   5   9   0   23.62    2.10
   5   9   0   25.37    1.95
   5   9   0   25.61    2.42
   5   9   0   26.26    2.07
  -5  -9  -1   12.89    2.01
  -5  -9  -1   10.45    1.36
  -5  -9  -1   13.17    1.51
   5   9   1   12.06    1.50
   5   9   1   10.80    1.30
   5   9   1   11.03    1.35
   5   9   1   15.96    1.88
  -5  -9  -2    2.79    1.45
  -5  -9  -2    1.16    1.94
  -5  -9  -2    0.16    1.27
   5   9   2    0.21    1.23
   5   9   2    1.58    1.41
   5   9   2    1.33    1.13
  -5  -9  -3    9.25    2.19
  -5  -9  -3   10.49    1.61
  -5  -9  -3    8.09    1.33
   5   9   3   11.18    1.62
  -5  -9  -4    6.92    1.66
  -5  -9  -4    2.89    2.25
  -5  -9  -4    6.10    1.38
   5   9   4    6.30    1.71
  -5  -9  -5    0.52    2.36
  -5  -9  -5   -1.74    1.39
  -5  -9  -5    1.63    1.75
   5   9   5   -1.03    1.67
  -5  -9  -6   -1.27    1.51
  -5  -9  -6    4.88    2.66
  -5  -9  -6    4.34    1.89
   5   9   6   -0.64    1.74
  -5  -9  -7    6.35    2.93
  -5  -9  -7    1.76    2.02
  -5  -9  -7    3.56    1.63
   5   9   7    1.47    1.88
  -5  -9  -8   -0.34    2.12
  -5  -9  -8    4.27    3.06
   5   9   8    0.00    1.92
  -5  -9  -9   -4.34    3.55
  -5  -9 -10    3.37    2.53
   5   9  10   -0.65    2.44
  -5  -9 -11    5.39    2.80
   5   9  11    4.53    2.84
  -5  -8  10   -2.97    2.54
  -5  -8   9    6.23    2.30
   5   8  -9    0.69    2.05
  -5  -8   8    1.72    2.01
   5   8  -8   -0.55    1.84
  -5  -8   7    0.65    1.94
   5   8  -7    0.85    1.70
  -5  -8   6   14.84    2.02
   5   8  -6   13.19    1.84
  -5  -8   5   12.36    1.88
   5   8  -5   13.57    1.78
   5   8  -5   10.70    1.30
   5   8  -5   13.22    1.53
  -5  -8   4   14.65    1.85
   5   8  -4   13.25    1.42
   5   8  -4   11.84    1.71
   5   8  -4   12.89    1.30
  -5  -8   3    6.48    1.29
  -5  -8   3    7.28    1.76
   5   8  -3    7.35    1.29
   5   8  -3    9.96    1.65
   5   8  -3    6.27    1.16
  -5  -8   2   13.38    1.31
  -5  -8   2    9.68    1.10
  -5  -8   2   12.87    1.86
   5   8  -2    9.71    1.20
   5   8  -2   12.22    1.31
   5   8  -2   10.81    1.63
  -5  -8   1   -1.11    1.19
  -5  -8   1   -1.04    1.64
  -5  -8   1   -0.24    1.00
   5   8  -1   -0.22    1.05
   5   8  -1    0.73    1.13
   5   8  -1   -2.25    1.43
  -5  -8   0   31.85    2.70
  -5  -8   0   30.68    2.09
  -5  -8   0   27.72    1.89
   5   8   0   29.70    2.26
   5   8   0   30.26    2.07
   5   8   0   31.45    2.00
   5   8   0   29.54    1.97
  -5  -8  -1   25.10    1.94
  -5  -8  -1   28.96    2.79
  -5  -8  -1   27.10    2.12
   5   8   1   27.00    2.04
   5   8   1   22.89    1.90
   5   8   1   26.79    1.93
  -5  -8  -2   27.62    2.11
  -5  -8  -2   29.24    2.24
  -5  -8  -2   35.71    2.90
   5   8   2   26.79    1.94
   5   8   2   33.01    1.92
   5   8   2   32.40    2.20
  -5  -8  -3    0.92    1.38
  -5  -8  -3    5.45    1.95
  -5  -8  -3    2.48    1.23
   5   8   3    4.31    1.45
  -5  -8  -4    2.04    1.49
  -5  -8  -4    0.58    1.23
  -5  -8  -4    5.59    1.99
   5   8   4    0.27    1.45
  -5  -8  -5   -0.03    2.11
  -5  -8  -5    0.96    1.31
  -5  -8  -5   -2.54    1.54
   5   8   5   -0.16    1.62
  -5  -8  -6    7.68    2.50
   5   8   6    6.23    1.76
  -5  -8  -7   -2.19    1.92
  -5  -8  -7    1.04    2.63
   5   8   7    0.75    1.77
  -5  -8  -8   21.51    3.22
  -5  -8  -8   18.14    2.34
   5   8   8   18.84    2.21
  -5  -8  -9    8.27    3.20
  -5  -8  -9    9.18    2.36
   5   8   9    7.06    2.27
  -5  -8 -10    7.51    2.51
   5   8  10    3.91    2.49
  -5  -8 -11    3.25    2.64
   5   8  11    5.73    2.69
  -5  -7   8   -0.52    1.82
   5   7  -7   26.92    2.65
  -5  -7   6    0.06    1.61
   5   7  -6    0.05    1.47
  -5  -7   5   56.31    2.95
   5   7  -5   62.04    2.94
   5   7  -5   60.72    2.56
   5   7  -5   57.97    2.42
  -5  -7   4    1.78    1.52
   5   7  -4   -1.57    1.40
   5   7  -4    1.65    1.13
   5   7  -4    0.34    1.03
  -5  -7   3   13.36    1.12
  -5  -7   3   15.46    1.66
  -5  -7   3   17.03    1.30
   5   7  -3   17.36    1.32
   5   7  -3   16.40    1.65
   5   7  -3   14.93    1.23
  -5  -7   2    5.93    1.65
  -5  -7   2    6.43    1.18
  -5  -7   2    6.04    0.98
   5   7  -2    5.03    1.44
   5   7  -2    6.17    1.08
   5   7  -2    5.66    1.13
  -5  -7   1    2.41    1.54
  -5  -7   1    1.82    1.13
  -5  -7   1    1.14    0.97
   5   7  -1    0.79    1.39
   5   7  -1    2.40    1.06
   5   7  -1    1.72    1.00
  -5  -7   0   -0.59    1.12
  -5  -7   0    0.97    1.00
  -5  -7   0   -1.14    1.52
   5   7   0   -0.19    1.02
   5   7   0    1.06    1.06
   5   7   0    0.73    1.01
  -5  -7  -1   42.44    2.20
  -5  -7  -1   42.77    2.07
  -5  -7  -1   45.73    2.74
   5   7   1   39.55    2.04
   5   7   1   43.77    2.20
   5   7   1   43.05    2.08
  -5  -7  -2    4.06    1.25
  -5  -7  -2    4.41    1.66
  -5  -7  -2    4.00    1.18
   5   7   2    4.81    1.05
   5   7   2    4.27    1.26
  -5  -7  -3    0.83    1.68
  -5  -7  -3    6.08    1.31
  -5  -7  -3    0.10    1.17
   5   7   3    1.00    1.36
  -5  -7  -4   -0.82    1.82
  -5  -7  -4    2.83    1.33
  -5  -7  -4   -1.17    1.21
   5   7   4    1.66    1.42
  -5  -7  -5    0.98    1.99
  -5  -7  -5    0.43    1.43
   5   7   5    0.06    1.49
  -5  -7  -6    1.73    1.88
  -5  -7  -6   -0.21    1.77
   5   7   6   -0.01    1.53
  -5  -7  -7   10.45    1.95
  -5  -7  -7    7.75    2.23
   5   7   7    9.52    1.81
  -5  -7  -8    4.52    2.00
  -5  -7  -8    6.03    2.57
   5   7   8    3.84    1.92
  -5  -7  -9    0.64    2.09
   5   7   9    0.32    2.02
  -5  -7 -10    9.15    3.99
   5   7  10    5.42    4.04
  -5  -7 -11   -2.66    2.52
   5   7  11   -2.53    2.43
  -5  -7 -12   -5.55    2.68
   5   7  12    3.82    2.66
  -5  -6   6   46.78    3.24
   5   6  -6   50.74    2.64
  -5  -6   5    8.75    1.74
  -5  -6   4    1.18    1.39
   5   6  -4    0.23    1.31
   5   6  -4    1.35    1.06
   5   6  -4    0.67    0.97
  -5  -6   3   10.23    1.53
   5   6  -3    8.28    1.08
   5   6  -3   10.09    1.39
   5   6  -3   10.36    1.12
  -5  -6   2   16.83    1.68
  -5  -6   2   15.79    1.64
  -5  -6   2   14.08    1.45
   5   6  -2   16.04    1.23
   5   6  -2   16.46    1.50
   5   6  -2   15.06    1.18
  -5  -6   1   34.85    1.80
  -5  -6   1   37.14    2.20
  -5  -6   1   35.38    2.76
   5   6  -1   39.10    2.03
   5   6  -1   37.48    1.93
  -5  -6   0   41.25    2.08
  -5  -6   0   39.58    1.94
  -5  -6   0   38.71    1.93
  -5  -6   0   43.42    3.29
   5   6   0   42.82    1.95
   5   6   0   41.03    1.79
  -5  -6  -1   58.51    2.42
  -5  -6  -1   61.85    2.89
   5   6   1   56.18    2.61
   5   6   1   57.20    2.28
   5   6   1   57.77    2.32
  -5  -6  -2    3.06    1.53
  -5  -6  -2    3.37    1.08
  -5  -6  -2    5.67    1.15
   5   6   2    2.50    0.96
   5   6   2    3.96    0.99
   5   6   2    3.41    1.21
  -5  -6  -3    8.75    1.21
  -5  -6  -3   12.68    1.69
  -5  -6  -3    9.48    1.44
  -5  -6  -3    9.29    1.28
   5   6   3    9.86    1.34
  -5  -6  -4   15.69    1.37
  -5  -6  -4   15.19    1.68
  -5  -6  -4   19.89    2.20
   5   6   4   15.52    1.51
  -5  -6  -5   -0.68    1.62
  -5  -6  -5    0.80    1.49
   5   6   5    1.26    1.38
  -5  -6  -6   -1.05    1.77
  -5  -6  -6   -2.10    1.60
   5   6   6   -0.16    1.51
  -5  -6  -7    5.92    2.11
  -5  -6  -7    5.43    1.78
   5   6   7    4.90    1.74
  -5  -6  -8   16.33    2.01
  -5  -6  -8   17.69    2.51
   5   6   8   15.45    1.98
  -5  -6  -9    3.24    2.03
  -5  -6  -9    4.85    2.41
   5   6   9    0.24    1.89
  -5  -6 -10    4.38    2.29
   5   6  10    0.76    2.19
  -5  -6 -11   -1.70    2.43
   5   6  11   -1.55    2.33
  -5  -6 -12   -2.91    2.56
   5   6  12   -1.28    2.58
   5   5  -5   15.49    1.43
  -5  -5   4   71.08    2.81
   5   5  -4   67.98    2.77
   5   5  -4   68.81    2.47
  -5  -5   3    0.46    1.34
   5   5  -3    0.44    0.90
   5   5  -3   -0.02    1.20
   5   5  -3   -1.06    0.97
  -5  -5   2   19.42    1.57
  -5  -5   2   14.98    1.47
  -5  -5   2   16.41    1.18
   5   5  -2   15.95    1.61
   5   5  -2   14.72    1.15
   5   5  -2   15.62    1.43
  -5  -5   1   15.78    1.56
  -5  -5   1   12.62    1.17
  -5  -5   1   12.16    1.08
   5   5  -1   12.92    1.11
   5   5  -1   15.37    1.15
  -5  -5   0    1.56    1.01
  -5  -5   0    1.52    0.91
  -5  -5   0    1.67    1.36
  -5  -5   0    0.51    0.94
   5   5   0    0.87    0.98
   5   5   0    1.71    0.91
  -5  -5  -1   74.97    3.07
  -5  -5  -1   73.42    2.62
  -5  -5  -1   74.93    2.70
  -5  -5  -1   75.72    2.69
   5   5   1   75.18    2.60
   5   5   1   72.61    2.55
   5   5   1   74.03    2.59
  -5  -5  -2   64.50    2.47
  -5  -5  -2   69.27    2.59
  -5  -5  -2   64.08    3.05
  -5  -5  -2   69.36    2.65
   5   5   2   66.78    2.58
   5   5   2   64.28    2.36
  -5  -5  -3    1.50    1.08
  -5  -5  -3    0.31    1.01
  -5  -5  -3    0.25    1.20
  -5  -5  -3    1.83    1.27
   5   5   3    1.04    1.14
  -5  -5  -4   28.17    2.00
  -5  -5  -4   27.93    2.24
  -5  -5  -4   26.36    2.16
  -5  -5  -4   26.44    1.86
   5   5   4   25.77    2.01
  -5  -5  -5    3.04    1.45
  -5  -5  -5    2.17    1.53
   5   5   5    0.59    1.34
  -5  -5  -6   26.87    2.42
  -5  -5  -6   28.35    2.69
   5   5   6   28.83    2.38
  -5  -5  -7   18.88    2.06
  -5  -5  -7   13.13    1.79
   5   5   7   15.33    1.77
  -5  -5  -8   -0.80    1.85
  -5  -5  -8    0.29    2.13
   5   5   8   -0.20    1.64
  -5  -5  -9   -1.65    2.37
  -5  -5  -9   -2.02    1.89
   5   5   9    1.45    1.83
  -5  -5 -10    9.22    2.18
   5   5  10    9.19    2.21
  -5  -5 -11   -5.26    3.90
   5   5  11   -0.18    2.42
  -5  -5 -12   14.22    2.83
   5   5  12   15.01    2.66
   5   4 -14    0.58    3.38
   5   4  -4    8.86    0.92
  -5  -4   3   36.58    2.18
   5   4  -3   35.95    1.74
   5   4  -3   37.54    1.80
  -5  -4   2   62.04    2.65
  -5  -4   2   63.29    2.31
  -5  -4   2   61.98    2.25
   5   4  -2   64.40    2.31
   5   4  -2   61.22    2.29
  -5  -4   1  105.27    3.26
  -5  -4   1  104.21    3.25
  -5  -4   1  104.66    3.57
   5   4  -1   99.25    3.23
   5   4  -1  106.93    3.27
  -5  -4   0   -1.36    0.83
  -5  -4   0   -0.49    0.89
  -5  -4   0   -1.35    1.23
  -5  -4   0   -0.56    0.93
   5   4   0    0.00    0.89
   5   4   0    0.80    0.90
  -5  -4  -1   22.65    1.63
  -5  -4  -1   24.42    1.65
  -5  -4  -1   23.19    1.60
  -5  -4  -1   23.11    1.69
   5   4   1   24.06    1.57
   5   4   1   20.44    1.46
   5   4   1   23.86    1.59
  -5  -4  -2   17.34    1.73
  -5  -4  -2   20.05    1.67
  -5  -4  -2   18.12    1.78
  -5  -4  -2   17.24    1.54
   5   4   2   17.68    1.50
  -5  -4  -3    2.15    1.20
  -5  -4  -3    1.18    1.22
  -5  -4  -3    2.10    0.96
  -5  -4  -3    1.93    1.00
   5   4   3    0.78    1.10
  -5  -4  -4   51.74    2.54
  -5  -4  -4   56.56    2.56
   5   4   4   50.89    2.43
  -5  -4  -5   31.70    2.30
  -5  -4  -5   33.60    2.35
   5   4   5   32.67    2.20
  -5  -4  -6    4.69    1.46
  -5  -4  -6    5.20    1.59
   5   4   6    5.05    1.40
  -5  -4  -7   49.52    3.13
  -5  -4  -7   51.66    2.91
   5   4   7   51.49    2.82
  -5  -4  -8    2.39    2.08
  -5  -4  -8    2.22    1.74
   5   4   8    4.13    1.66
  -5  -4  -9    4.81    2.33
  -5  -4  -9    5.11    1.91
   5   4   9    3.82    1.89
  -5  -4 -10    3.41    2.83
  -5  -4 -10   -0.01    2.13
   5   4  10    4.53    2.00
  -5  -4 -11    1.87    2.37
   5   4  11    1.29    3.45
  -5  -4 -12    0.94    2.52
   5   3 -14    8.12    2.77
   5   3 -13    2.78    2.46
   5   3 -12   -0.91    2.25
   5   3  -3    5.19    0.84
   5   3  -3    4.35    0.89
  -5  -3   2   44.13    1.84
  -5  -3   2   46.58    2.20
  -5  -3   2   48.43    1.92
   5   3  -2   44.63    1.86
   5   3  -2   47.33    1.90
  -5  -3   1   -0.81    1.13
  -5  -3   1    0.37    0.84
  -5  -3   1   -1.21    0.84
   5   3  -1    0.47    0.85
   5   3  -1    0.33    0.82
  -5  -3   0   80.59    2.65
  -5  -3   0   80.10    2.70
  -5  -3   0   80.15    2.63
   5   3   0   81.91    2.67
   5   3   0   77.18    2.63
  -5  -3  -1    4.70    0.93
  -5  -3  -1    5.09    0.98
  -5  -3  -1    4.44    1.00
  -5  -3  -1    4.92    0.95
   5   3   1    6.22    0.93
   5   3   1    3.98    0.88
   5   3   1    5.59    0.90
  -5  -3  -2   68.82    2.42
  -5  -3  -2   67.96    2.56
  -5  -3  -2   66.13    2.51
  -5  -3  -2   65.36    2.36
   5   3   2   66.61    2.38
  -5  -3  -3    8.57    1.24
  -5  -3  -3    7.96    1.25
  -5  -3  -3    7.24    0.98
  -5  -3  -3    8.53    1.04
   5   3   3    6.21    1.12
  -5  -3  -4   57.17    2.46
  -5  -3  -4   52.37    2.98
   5   3   4   56.69    2.42
  -5  -3  -5   22.07    2.17
  -5  -3  -5   21.98    2.05
   5   3   5   17.30    1.94
  -5  -3  -6   39.59    2.63
  -5  -3  -6   39.35    2.45
   5   3   6   40.47    2.40
  -5  -3  -7   10.01    1.63
  -5  -3  -7   10.08    1.82
   5   3   7   10.88    1.60
  -5  -3  -8    5.83    1.73
  -5  -3  -8    5.12    1.95
   5   3   8    6.46    1.65
  -5  -3  -9   -1.16    1.82
  -5  -3  -9    3.03    2.21
   5   3   9   -0.70    1.70
  -5  -3 -10   10.56    2.45
  -5  -3 -10    8.46    2.17
  -5  -3 -11    8.57    2.37
  -5  -3 -12   12.77    4.18
  -5  -3 -13    3.00    2.82
   5   2 -14    1.93    2.54
   5   2 -13   10.21    2.48
   5   2 -12    1.96    2.15
   5   2 -11    4.20    2.07
   5   2  -3    0.45    0.76
   5   2  -3    1.16    0.82
  -5  -2   2  115.06    3.48
  -5  -2   2  118.64    3.62
  -5  -2   2  115.79    3.44
   5   2  -2  117.73    3.47
   5   2  -2  119.27    3.51
  -5  -2   1   91.45    2.84
  -5  -2   1   91.27    2.87
   5   2  -1   91.89    2.87
   5   2  -1   89.77    2.84
   5   2  -1   89.61    2.82
  -5  -2   0   41.15    1.79
  -5  -2   0   42.07    1.81
  -5  -2   0   41.74    1.83
   5   2   0   42.14    1.84
   5   2   0   43.20    1.87
   5   2   0   41.22    1.74
  -5  -2  -1   69.92    2.35
  -5  -2  -1   68.97    2.41
  -5  -2  -1   64.60    2.36
  -5  -2  -1   63.83    2.32
   5   2   1   68.45    2.27
   5   2   1   68.13    2.33
   5   2   1   65.06    2.24
   5   2   1   63.02    2.44
  -5  -2  -2    4.06    1.06
  -5  -2  -2    4.05    1.12
  -5  -2  -2    3.67    0.93
  -5  -2  -2    3.65    0.85
   5   2   2    1.73    1.16
   5   2   2    3.16    0.88
  -5  -2  -3    1.86    1.13
  -5  -2  -3    2.04    0.96
  -5  -2  -3    2.81    1.15
   5   2   3    1.26    1.00
  -5  -2  -4   25.73    2.03
  -5  -2  -4   24.67    1.97
   5   2   4   23.75    1.88
  -5  -2  -5    3.03    1.26
  -5  -2  -5    3.30    1.35
   5   2   5    3.30    1.23
  -5  -2  -6   39.59    2.58
  -5  -2  -6   41.55    2.50
   5   2   6   45.51    2.44
  -5  -2  -7    5.65    1.55
  -5  -2  -7    4.96    1.68
   5   2   7    5.89    1.48
  -5  -2  -8   11.24    1.76
  -5  -2  -8   11.98    1.98
  -5  -2  -9    0.96    2.12
  -5  -2  -9   -1.48    1.77
  -5  -2 -10   -1.32    1.95
  -5  -2 -10    1.65    2.51
  -5  -2 -11    2.62    2.33
  -5  -2 -12    8.42    2.98
  -5  -2 -13    2.83    2.76
   5   1 -15    0.06    2.80
   5   1 -14    3.46    2.66
   5   1 -13   13.94    2.42
   5   1 -12    0.71    1.96
   5   1 -11   16.43    2.08
   5   1 -10    2.78    1.70
   5   1  -9   28.81    2.38
   5   1  -8   -0.84    1.45
   5   1  -3  173.02    4.81
   5   1  -3  169.37    4.82
  -5  -1   2    0.74    0.79
  -5  -1   2   -0.13    0.75
   5   1  -2    1.22    0.77
   5   1  -2    1.75    0.82
  -5  -1   1  120.19    3.51
  -5  -1   1  120.23    3.53
  -5  -1   1  119.23    3.53
   5   1  -1  117.31    3.53
   5   1  -1  122.76    3.54
   5   1  -1  116.85    3.51
  -5  -1   0    2.12    0.81
  -5  -1   0    1.84    0.88
  -5  -1   0    2.46    0.86
   5   1   0    2.78    0.93
   5   1   0    1.56    0.84
   5   1   0    2.77    0.80
  -5  -1  -1  136.83    3.93
  -5  -1  -1  134.11    4.02
  -5  -1  -1  134.90    3.95
   5   1   1  134.60    4.02
   5   1   1  137.50    3.93
   5   1   1  129.04    3.86
  -5  -1  -2    6.14    1.12
  -5  -1  -2    4.62    0.87
  -5  -1  -2    6.19    0.94
  -5  -1  -2    6.92    1.04
   5   1   2    6.52    1.15
  -5  -1  -3  140.35    4.10
  -5  -1  -3  135.76    4.33
  -5  -1  -3  145.69    4.28
   5   1   3  142.94    4.34
  -5  -1  -4    8.94    1.28
  -5  -1  -4    6.44    1.29
  -5  -1  -5   38.43    2.32
  -5  -1  -5   38.79    2.29
  -5  -1  -6    9.72    1.46
  -5  -1  -6    9.86    1.53
  -5  -1  -7    8.25    1.62
  -5  -1  -7    9.53    1.71
  -5  -1  -8    7.05    1.71
  -5  -1  -8    5.53    1.90
  -5  -1  -9   10.08    2.19
  -5  -1  -9    8.56    1.97
  -5  -1 -10    2.47    2.07
  -5  -1 -10   -0.98    2.30
  -5  -1 -11    2.89    2.27
  -5  -1 -12    4.28    2.50
  -5  -1 -13   -0.83    2.74
   5   0 -15   -0.38    2.71
   5   0 -14    7.75    2.46
   5   0 -14   10.92    2.58
[truncated: 468,203 more chars]
